# Supplementary material
Source: MDPI journal article supplement (https://www.mdpi.com/2076-3417/12/6/2776)
Supplement: s1 [file s1]

Archive with 2 entries (2 files):
- database.csv
- Supplementary Materials.pdf
