# Supplementary material
Source: MDPI journal article supplement (https://www.mdpi.com/2076-3417/12/6/2776)
Supplement: s1 [file s1 › database.csv]

id	country	location	fao_division	sea	lat	lon	geog_prec	class	order	family	spec_nam_s	spec_nam_c	spec_code	mar_habit	troph_lev	troph_lev_r	depth_m	lenght_cm	weight_g	age_y	sex	tissue_cod	pah	pah_molecular_weight	pah_origin	DW_FW_WW	LOQ_mg_kg	LOD_mg_kg	mea_mg_kg_orig	mea_mg_kg_derived	min_mg_kg	max_mg_kg	sample_size	period	samp_date	season	wild_farmed_transplanted	ref_source	yr_ref	yr_samp	ref_num	THQ_mean_orig	THQ_mean_derived	THQ_min	THQ_max	ELCR	species_IR_kg/day	RFD_mg/kg/day	CSF_mg/kg-day
1	IT	Gulf of Naples	37.1.3	Tyrrhenian	40.69191	14.17448	2	Actinopterygii	Perciformes	Gobiidae	Gobius paganellus	Rock goby	Gobpag	brackishwater estuaries	3.30	FB	NA	NA	8	NA	NA	NA	Ace	LMW	Petrogenic	WW	NA	NA	<LOD	NA	NA	NA	NA	March-December 1988	01/03/1988	NA	W	Cocchieri et al., 1990	1990	1988	1	NA	NA	NA	NA	NA	0.003945205	0.06	NA
2	IT	Gulf of Naples	37.1.3	Tyrrhenian	40.69191	14.17448	2	Actinopterygii	Perciformes	Gobiidae	Gobius paganellus	Rock goby	Gobpag	brackishwater estuaries	3.30	FB	NA	NA	8	NA	NA	NA	Acy	LMW	Petrogenic	WW	NA	0.02	<LOD	0.01	NA	NA	NA	March-December 1988	01/03/1988	NA	W	Cocchieri et al., 1990	1990	1988	1	NA	NA	NA	NA	NA	0.003945205	NA	NA
3	IT	Gulf of Naples	37.1.3	Tyrrhenian	40.69191	14.17448	2	Actinopterygii	Perciformes	Gobiidae	Gobius paganellus	Rock goby	Gobpag	brackishwater estuaries	3.30	FB	NA	NA	8	NA	NA	NA	Ant	LMW	Petrogenic	WW	NA	0.001	0.003	0.003	NA	NA	NA	March-December 1988	01/03/1988	NA	W	Cocchieri et al., 1990	1990	1988	1	5.92373E-07	5.92373E-07	NA	NA	NA	0.003945205	0.3	NA
4	IT	Gulf of Naples	37.1.3	Tyrrhenian	40.69191	14.17448	2	Actinopterygii	Perciformes	Gobiidae	Gobius paganellus	Rock goby	Gobpag	brackishwater estuaries	3.30	FB	NA	NA	8	NA	NA	NA	BaA	HMW	Pyrolitic	WW	NA	NA	0.032	0.032	NA	NA	NA	March-December 1988	01/03/1988	NA	W	Cocchieri et al., 1990	1990	1988	1	NA	NA	NA	NA	2.27471E-06	0.003945205	NA	1.2
5	IT	Gulf of Naples	37.1.3	Tyrrhenian	40.69191	14.17448	2	Actinopterygii	Perciformes	Gobiidae	Gobius paganellus	Rock goby	Gobpag	brackishwater estuaries	3.30	FB	NA	NA	8	NA	NA	NA	BaP	HMW	Pyrolitic	WW	NA	NA	<LOD	NA	NA	NA	NA	March-December 1988	01/03/1988	NA	W	Cocchieri et al., 1990	1990	1988	1	NA	NA	NA	NA	NA	0.003945205	0.0003	2.9
6	IT	Gulf of Naples	37.1.3	Tyrrhenian	40.69191	14.17448	2	Actinopterygii	Perciformes	Gobiidae	Gobius paganellus	Rock goby	Gobpag	brackishwater estuaries	3.30	FB	NA	NA	8	NA	NA	NA	BbF	HMW	Pyrolitic	WW	NA	NA	0.01	0.01	NA	NA	NA	March-December 1988	01/03/1988	NA	W	Cocchieri et al., 1990	1990	1988	1	NA	NA	NA	NA	7.10848E-07	0.003945205	NA	1.2
7	IT	Gulf of Naples	37.1.3	Tyrrhenian	40.69191	14.17448	2	Actinopterygii	Perciformes	Gobiidae	Gobius paganellus	Rock goby	Gobpag	brackishwater estuaries	3.30	FB	NA	NA	8	NA	NA	NA	BghiP	HMW	Pyrolitic	WW	NA	NA	0.014	0.014	NA	NA	NA	March-December 1988	01/03/1988	NA	W	Cocchieri et al., 1990	1990	1988	1	NA	NA	NA	NA	NA	0.003945205	NA	NA
8	IT	Gulf of Naples	37.1.3	Tyrrhenian	40.69191	14.17448	2	Actinopterygii	Perciformes	Gobiidae	Gobius paganellus	Rock goby	Gobpag	brackishwater estuaries	3.30	FB	NA	NA	8	NA	NA	NA	BkF	HMW	Pyrolitic	WW	NA	NA	0.062	0.062	NA	NA	NA	March-December 1988	01/03/1988	NA	W	Cocchieri et al., 1990	1990	1988	1	NA	NA	NA	NA	4.40726E-06	0.003945205	NA	1.2
9	IT	Gulf of Naples	37.1.3	Tyrrhenian	40.69191	14.17448	2	Actinopterygii	Perciformes	Gobiidae	Gobius paganellus	Rock goby	Gobpag	brackishwater estuaries	3.30	FB	NA	NA	8	NA	NA	NA	Chr	HMW	Pyrolitic	WW	NA	NA	0.01	0.01	NA	NA	NA	March-December 1988	01/03/1988	NA	W	Cocchieri et al., 1990	1990	1988	1	NA	NA	NA	NA	2.61506E-07	0.003945205	NA	0.441455329
10	IT	Gulf of Naples	37.1.3	Tyrrhenian	40.69191	14.17448	2	Actinopterygii	Perciformes	Gobiidae	Gobius paganellus	Rock goby	Gobpag	brackishwater estuaries	3.30	FB	NA	NA	8	NA	NA	NA	DahA	HMW	Pyrolitic	WW	NA	NA	0.014	0.014	NA	NA	NA	March-December 1988	01/03/1988	NA	W	Cocchieri et al., 1990	1990	1988	1	NA	NA	NA	NA	3.40022E-06	0.003945205	NA	4.1
11	IT	Gulf of Naples	37.1.3	Tyrrhenian	40.69191	14.17448	2	Actinopterygii	Perciformes	Gobiidae	Gobius paganellus	Rock goby	Gobpag	brackishwater estuaries	3.30	FB	NA	NA	8	NA	NA	NA	Fl	LMW	Petrogenic	WW	NA	NA	0.005	0.005	NA	NA	NA	March-December 1988	01/03/1988	NA	W	Cocchieri et al., 1990	1990	1988	1	7.40466E-06	7.40466E-06	NA	NA	NA	0.003945205	0.04	NA
12	IT	Gulf of Naples	37.1.3	Tyrrhenian	40.69191	14.17448	2	Actinopterygii	Perciformes	Gobiidae	Gobius paganellus	Rock goby	Gobpag	brackishwater estuaries	3.30	FB	NA	NA	8	NA	NA	NA	Flu	MMW	Pyrolitic	WW	NA	NA	0.007	0.007	NA	NA	NA	March-December 1988	01/03/1988	NA	W	Cocchieri et al., 1990	1990	1988	1	1.03665E-05	1.03665E-05	NA	NA	NA	0.003945205	0.04	NA
13	IT	Gulf of Naples	37.1.3	Tyrrhenian	40.69191	14.17448	2	Actinopterygii	Perciformes	Gobiidae	Gobius paganellus	Rock goby	Gobpag	brackishwater estuaries	3.30	FB	NA	NA	8	NA	NA	NA	InP	HMW	Pyrolitic	WW	NA	NA	0.027	0.027	NA	NA	NA	March-December 1988	01/03/1988	NA	W	Cocchieri et al., 1990	1990	1988	1	NA	NA	NA	NA	1.91929E-06	0.003945205	NA	1.2
14	IT	Gulf of Naples	37.1.3	Tyrrhenian	40.69191	14.17448	2	Actinopterygii	Perciformes	Gobiidae	Gobius paganellus	Rock goby	Gobpag	brackishwater estuaries	3.30	FB	NA	NA	8	NA	NA	NA	Nap	LMW	Petrogenic	WW	NA	NA	0.02	0.02	NA	NA	NA	March-December 1988	01/03/1988	NA	W	Cocchieri et al., 1990	1990	1988	1	5.92373E-05	5.92373E-05	NA	NA	5.23013E-07	0.003945205	0.02	0.441455329
15	IT	Gulf of Naples	37.1.3	Tyrrhenian	40.69191	14.17448	2	Actinopterygii	Perciformes	Gobiidae	Gobius paganellus	Rock goby	Gobpag	brackishwater estuaries	3.30	FB	NA	NA	8	NA	NA	NA	Phe	LMW	Petrogenic	WW	NA	NA	0.006	0.006	NA	NA	NA	March-December 1988	01/03/1988	NA	W	Cocchieri et al., 1990	1990	1988	1	NA	NA	NA	NA	NA	0.003945205	NA	NA
16	IT	Gulf of Naples	37.1.3	Tyrrhenian	40.69191	14.17448	2	Actinopterygii	Perciformes	Gobiidae	Gobius paganellus	Rock goby	Gobpag	brackishwater estuaries	3.30	FB	NA	NA	8	NA	NA	NA	Pyr	MMW	Pyrolitic	WW	NA	NA	<LOD	NA	NA	NA	NA	March-December 1988	01/03/1988	NA	W	Cocchieri et al., 1990	1990	1988	1	NA	NA	NA	NA	NA	0.003945205	0.03	NA
17	IT	Gulf of Naples	37.1.3	Tyrrhenian	40.69191	14.17448	2	Actinopterygii	Pleuronectiformes	Soleidae	Solea solea	Common sole	Solsol	brackishwater estuaries	3.30	FB	NA	NA	33	NA	NA	NA	Ace	LMW	Petrogenic	WW	NA	NA	<LOD	NA	NA	NA	NA	March-December 1988	01/03/1988	NA	W	Cocchieri et al., 1990	1990	1988	1	NA	NA	NA	NA	NA	0.003945205	0.06	NA
18	IT	Gulf of Naples	37.1.3	Tyrrhenian	40.69191	14.17448	2	Actinopterygii	Pleuronectiformes	Soleidae	Solea solea	Common sole	Solsol	brackishwater estuaries	3.30	FB	NA	NA	33	NA	NA	NA	Acy	LMW	Petrogenic	WW	NA	0.02	<LOD	0.01	NA	NA	NA	March-December 1988	01/03/1988	NA	W	Cocchieri et al., 1990	1990	1988	1	NA	NA	NA	NA	NA	0.003945205	NA	NA
19	IT	Gulf of Naples	37.1.3	Tyrrhenian	40.69191	14.17448	2	Actinopterygii	Pleuronectiformes	Soleidae	Solea solea	Common sole	Solsol	brackishwater estuaries	3.30	FB	NA	NA	33	NA	NA	NA	Ant	LMW	Petrogenic	WW	NA	0.001	0.004	0.004	NA	NA	NA	March-December 1988	01/03/1988	NA	W	Cocchieri et al., 1990	1990	1988	1	7.89831E-07	7.89831E-07	NA	NA	NA	0.003945205	0.3	NA
20	IT	Gulf of Naples	37.1.3	Tyrrhenian	40.69191	14.17448	2	Actinopterygii	Pleuronectiformes	Soleidae	Solea solea	Common sole	Solsol	brackishwater estuaries	3.30	FB	NA	NA	33	NA	NA	NA	BaA	HMW	Pyrolitic	WW	NA	NA	0.004	0.004	NA	NA	NA	March-December 1988	01/03/1988	NA	W	Cocchieri et al., 1990	1990	1988	1	NA	NA	NA	NA	2.84339E-07	0.003945205	NA	1.2
21	IT	Gulf of Naples	37.1.3	Tyrrhenian	40.69191	14.17448	2	Actinopterygii	Pleuronectiformes	Soleidae	Solea solea	Common sole	Solsol	brackishwater estuaries	3.30	FB	NA	NA	33	NA	NA	NA	BaP	HMW	Pyrolitic	WW	NA	NA	<LOD	NA	NA	NA	NA	March-December 1988	01/03/1988	NA	W	Cocchieri et al., 1990	1990	1988	1	NA	NA	NA	NA	NA	0.003945205	0.0003	2.9
22	IT	Gulf of Naples	37.1.3	Tyrrhenian	40.69191	14.17448	2	Actinopterygii	Pleuronectiformes	Soleidae	Solea solea	Common sole	Solsol	brackishwater estuaries	3.30	FB	NA	NA	33	NA	NA	NA	BbF	HMW	Pyrolitic	WW	NA	NA	<LOD	NA	NA	NA	NA	March-December 1988	01/03/1988	NA	W	Cocchieri et al., 1990	1990	1988	1	NA	NA	NA	NA	NA	0.003945205	NA	1.2
23	IT	Gulf of Naples	37.1.3	Tyrrhenian	40.69191	14.17448	2	Actinopterygii	Pleuronectiformes	Soleidae	Solea solea	Common sole	Solsol	brackishwater estuaries	3.30	FB	NA	NA	33	NA	NA	NA	BghiP	HMW	Pyrolitic	WW	NA	NA	<LOD	NA	NA	NA	NA	March-December 1988	01/03/1988	NA	W	Cocchieri et al., 1990	1990	1988	1	NA	NA	NA	NA	NA	0.003945205	NA	NA
24	IT	Gulf of Naples	37.1.3	Tyrrhenian	40.69191	14.17448	2	Actinopterygii	Pleuronectiformes	Soleidae	Solea solea	Common sole	Solsol	brackishwater estuaries	3.30	FB	NA	NA	33	NA	NA	NA	BkF	HMW	Pyrolitic	WW	NA	NA	0.735	0.735	NA	NA	NA	March-December 1988	01/03/1988	NA	W	Cocchieri et al., 1990	1990	1988	1	NA	NA	NA	NA	5.22473E-05	0.003945205	NA	1.2
25	IT	Gulf of Naples	37.1.3	Tyrrhenian	40.69191	14.17448	2	Actinopterygii	Pleuronectiformes	Soleidae	Solea solea	Common sole	Solsol	brackishwater estuaries	3.30	FB	NA	NA	33	NA	NA	NA	Chr	HMW	Pyrolitic	WW	NA	NA	0.002	0.002	NA	NA	NA	March-December 1988	01/03/1988	NA	W	Cocchieri et al., 1990	1990	1988	1	NA	NA	NA	NA	5.23013E-08	0.003945205	NA	0.441455329
26	IT	Gulf of Naples	37.1.3	Tyrrhenian	40.69191	14.17448	2	Actinopterygii	Pleuronectiformes	Soleidae	Solea solea	Common sole	Solsol	brackishwater estuaries	3.30	FB	NA	NA	33	NA	NA	NA	DahA	HMW	Pyrolitic	WW	NA	NA	0.003	0.003	NA	NA	NA	March-December 1988	01/03/1988	NA	W	Cocchieri et al., 1990	1990	1988	1	NA	NA	NA	NA	7.28619E-07	0.003945205	NA	4.1
27	IT	Gulf of Naples	37.1.3	Tyrrhenian	40.69191	14.17448	2	Actinopterygii	Pleuronectiformes	Soleidae	Solea solea	Common sole	Solsol	brackishwater estuaries	3.30	FB	NA	NA	33	NA	NA	NA	Fl	LMW	Petrogenic	WW	NA	NA	<LOD	NA	NA	NA	NA	March-December 1988	01/03/1988	NA	W	Cocchieri et al., 1990	1990	1988	1	NA	NA	NA	NA	NA	0.003945205	0.04	NA
28	IT	Gulf of Naples	37.1.3	Tyrrhenian	40.69191	14.17448	2	Actinopterygii	Pleuronectiformes	Soleidae	Solea solea	Common sole	Solsol	brackishwater estuaries	3.30	FB	NA	NA	33	NA	NA	NA	Flu	MMW	Pyrolitic	WW	NA	NA	0.002	0.002	NA	NA	NA	March-December 1988	01/03/1988	NA	W	Cocchieri et al., 1990	1990	1988	1	2.96187E-06	2.96187E-06	NA	NA	NA	0.003945205	0.04	NA
29	IT	Gulf of Naples	37.1.3	Tyrrhenian	40.69191	14.17448	2	Actinopterygii	Pleuronectiformes	Soleidae	Solea solea	Common sole	Solsol	brackishwater estuaries	3.30	FB	NA	NA	33	NA	NA	NA	InP	HMW	Pyrolitic	WW	NA	NA	0.006	0.006	NA	NA	NA	March-December 1988	01/03/1988	NA	W	Cocchieri et al., 1990	1990	1988	1	NA	NA	NA	NA	4.26509E-07	0.003945205	NA	1.2
30	IT	Gulf of Naples	37.1.3	Tyrrhenian	40.69191	14.17448	2	Actinopterygii	Pleuronectiformes	Soleidae	Solea solea	Common sole	Solsol	brackishwater estuaries	3.30	FB	NA	NA	33	NA	NA	NA	Nap	LMW	Petrogenic	WW	NA	NA	<LOD	NA	NA	NA	NA	March-December 1988	01/03/1988	NA	W	Cocchieri et al., 1990	1990	1988	1	NA	NA	NA	NA	NA	0.003945205	0.02	0.441455329
31	IT	Gulf of Naples	37.1.3	Tyrrhenian	40.69191	14.17448	2	Actinopterygii	Pleuronectiformes	Soleidae	Solea solea	Common sole	Solsol	brackishwater estuaries	3.30	FB	NA	NA	33	NA	NA	NA	Phe	LMW	Petrogenic	WW	NA	NA	0.004	0.004	NA	NA	NA	March-December 1988	01/03/1988	NA	W	Cocchieri et al., 1990	1990	1988	1	NA	NA	NA	NA	NA	0.003945205	NA	NA
32	IT	Gulf of Naples	37.1.3	Tyrrhenian	40.69191	14.17448	2	Actinopterygii	Pleuronectiformes	Soleidae	Solea solea	Common sole	Solsol	brackishwater estuaries	3.30	FB	NA	NA	33	NA	NA	NA	Pyr	MMW	Pyrolitic	WW	NA	NA	<LOD	NA	NA	NA	NA	March-December 1988	01/03/1988	NA	W	Cocchieri et al., 1990	1990	1988	1	NA	NA	NA	NA	NA	0.003945205	0.03	NA
33	IT	Gulf of Naples	37.1.3	Tyrrhenian	40.69191	14.17448	2	Bivalvia	Veneroidea	Cardiidae	Cerastoderma edule	Common edible cockle	Ceredu	neritic epipelagic benthic	NA		NA	NA	NA	NA	NA	NA	Ace	LMW	Petrogenic	WW	NA	NA	<LOD	NA	NA	NA	NA	March-December 1988	01/03/1988	NA	W	Cocchieri et al., 1990	1990	1988	1	NA	NA	NA	NA	NA	0.014684932	0.06	NA
34	IT	Gulf of Naples	37.1.3	Tyrrhenian	40.69191	14.17448	2	Bivalvia	Veneroidea	Cardiidae	Cerastoderma edule	Common edible cockle	Ceredu	neritic epipelagic benthic	NA		NA	NA	NA	NA	NA	NA	Acy	LMW	Petrogenic	WW	NA	0.02	<LOD	0.01	NA	NA	NA	March-December 1988	01/03/1988	NA	W	Cocchieri et al., 1990	1990	1988	1	NA	NA	NA	NA	NA	0.014684932	NA	NA
35	IT	Gulf of Naples	37.1.3	Tyrrhenian	40.69191	14.17448	2	Bivalvia	Veneroidea	Cardiidae	Cerastoderma edule	Common edible cockle	Ceredu	neritic epipelagic benthic	NA		NA	NA	NA	NA	NA	NA	Ant	LMW	Petrogenic	WW	NA	0.001	0.003	0.003	NA	NA	NA	March-December 1988	01/03/1988	NA	W	Cocchieri et al., 1990	1990	1988	1	2.20494E-06	2.20494E-06	NA	NA	NA	0.014684932	0.3	NA
36	IT	Gulf of Naples	37.1.3	Tyrrhenian	40.69191	14.17448	2	Bivalvia	Veneroidea	Cardiidae	Cerastoderma edule	Common edible cockle	Ceredu	neritic epipelagic benthic	NA		NA	NA	NA	NA	NA	NA	BaA	HMW	Pyrolitic	WW	NA	NA	0.046	0.046	NA	NA	NA	March-December 1988	01/03/1988	NA	W	Cocchieri et al., 1990	1990	1988	1	NA	NA	NA	NA	1.21713E-05	0.014684932	NA	1.2
37	IT	Gulf of Naples	37.1.3	Tyrrhenian	40.69191	14.17448	2	Bivalvia	Veneroidea	Cardiidae	Cerastoderma edule	Common edible cockle	Ceredu	neritic epipelagic benthic	NA		NA	NA	NA	NA	NA	NA	BaP	HMW	Pyrolitic	WW	NA	NA	0.021	0.021	NA	NA	NA	March-December 1988	01/03/1988	NA	W	Cocchieri et al., 1990	1990	1988	1	0.015434613	0.015434613	NA	NA	1.34281E-05	0.014684932	0.0003	2.9
38	IT	Gulf of Naples	37.1.3	Tyrrhenian	40.69191	14.17448	2	Bivalvia	Veneroidea	Cardiidae	Cerastoderma edule	Common edible cockle	Ceredu	neritic epipelagic benthic	NA		NA	NA	NA	NA	NA	NA	BbF	HMW	Pyrolitic	WW	NA	NA	0.011	0.011	NA	NA	NA	March-December 1988	01/03/1988	NA	W	Cocchieri et al., 1990	1990	1988	1	NA	NA	NA	NA	2.91053E-06	0.014684932	NA	1.2
39	IT	Gulf of Naples	37.1.3	Tyrrhenian	40.69191	14.17448	2	Bivalvia	Veneroidea	Cardiidae	Cerastoderma edule	Common edible cockle	Ceredu	neritic epipelagic benthic	NA		NA	NA	NA	NA	NA	NA	BghiP	HMW	Pyrolitic	WW	NA	NA	0.01	0.01	NA	NA	NA	March-December 1988	01/03/1988	NA	W	Cocchieri et al., 1990	1990	1988	1	NA	NA	NA	NA	NA	0.014684932	NA	NA
40	IT	Gulf of Naples	37.1.3	Tyrrhenian	40.69191	14.17448	2	Bivalvia	Veneroidea	Cardiidae	Cerastoderma edule	Common edible cockle	Ceredu	neritic epipelagic benthic	NA		NA	NA	NA	NA	NA	NA	BkF	HMW	Pyrolitic	WW	NA	NA	0.01	0.01	NA	NA	NA	March-December 1988	01/03/1988	NA	W	Cocchieri et al., 1990	1990	1988	1	NA	NA	NA	NA	2.64593E-06	0.014684932	NA	1.2
41	IT	Gulf of Naples	37.1.3	Tyrrhenian	40.69191	14.17448	2	Bivalvia	Veneroidea	Cardiidae	Cerastoderma edule	Common edible cockle	Ceredu	neritic epipelagic benthic	NA		NA	NA	NA	NA	NA	NA	Chr	HMW	Pyrolitic	WW	NA	NA	0.04	0.04	NA	NA	NA	March-December 1988	01/03/1988	NA	W	Cocchieri et al., 1990	1990	1988	1	NA	NA	NA	NA	3.89354E-06	0.014684932	NA	0.441455329
42	IT	Gulf of Naples	37.1.3	Tyrrhenian	40.69191	14.17448	2	Bivalvia	Veneroidea	Cardiidae	Cerastoderma edule	Common edible cockle	Ceredu	neritic epipelagic benthic	NA		NA	NA	NA	NA	NA	NA	DahA	HMW	Pyrolitic	WW	NA	NA	0.008	0.008	NA	NA	NA	March-December 1988	01/03/1988	NA	W	Cocchieri et al., 1990	1990	1988	1	NA	NA	NA	NA	7.23222E-06	0.014684932	NA	4.1
43	IT	Gulf of Naples	37.1.3	Tyrrhenian	40.69191	14.17448	2	Bivalvia	Veneroidea	Cardiidae	Cerastoderma edule	Common edible cockle	Ceredu	neritic epipelagic benthic	NA		NA	NA	NA	NA	NA	NA	Fl	LMW	Petrogenic	WW	NA	NA	0.005	0.005	NA	NA	NA	March-December 1988	01/03/1988	NA	W	Cocchieri et al., 1990	1990	1988	1	2.75618E-05	2.75618E-05	NA	NA	NA	0.014684932	0.04	NA
44	IT	Gulf of Naples	37.1.3	Tyrrhenian	40.69191	14.17448	2	Bivalvia	Veneroidea	Cardiidae	Cerastoderma edule	Common edible cockle	Ceredu	neritic epipelagic benthic	NA		NA	NA	NA	NA	NA	NA	Flu	MMW	Pyrolitic	WW	NA	NA	0.02	0.02	NA	NA	NA	March-December 1988	01/03/1988	NA	W	Cocchieri et al., 1990	1990	1988	1	0.000110247	0.000110247	NA	NA	NA	0.014684932	0.04	NA
45	IT	Gulf of Naples	37.1.3	Tyrrhenian	40.69191	14.17448	2	Bivalvia	Veneroidea	Cardiidae	Cerastoderma edule	Common edible cockle	Ceredu	neritic epipelagic benthic	NA		NA	NA	NA	NA	NA	NA	InP	HMW	Pyrolitic	WW	NA	NA	0.008	0.008	NA	NA	NA	March-December 1988	01/03/1988	NA	W	Cocchieri et al., 1990	1990	1988	1	NA	NA	NA	NA	2.11675E-06	0.014684932	NA	1.2
46	IT	Gulf of Naples	37.1.3	Tyrrhenian	40.69191	14.17448	2	Bivalvia	Veneroidea	Cardiidae	Cerastoderma edule	Common edible cockle	Ceredu	neritic epipelagic benthic	NA		NA	NA	NA	NA	NA	NA	Nap	LMW	Petrogenic	WW	NA	NA	<LOD	NA	NA	NA	NA	March-December 1988	01/03/1988	NA	W	Cocchieri et al., 1990	1990	1988	1	NA	NA	NA	NA	NA	0.014684932	0.02	0.441455329
47	IT	Gulf of Naples	37.1.3	Tyrrhenian	40.69191	14.17448	2	Bivalvia	Veneroidea	Cardiidae	Cerastoderma edule	Common edible cockle	Ceredu	neritic epipelagic benthic	NA		NA	NA	NA	NA	NA	NA	Phe	LMW	Petrogenic	WW	NA	NA	0.006	0.006	NA	NA	NA	March-December 1988	01/03/1988	NA	W	Cocchieri et al., 1990	1990	1988	1	NA	NA	NA	NA	NA	0.014684932	NA	NA
48	IT	Gulf of Naples	37.1.3	Tyrrhenian	40.69191	14.17448	2	Bivalvia	Veneroidea	Cardiidae	Cerastoderma edule	Common edible cockle	Ceredu	neritic epipelagic benthic	NA		NA	NA	NA	NA	NA	NA	Pyr	MMW	Pyrolitic	WW	NA	NA	0.01	0.01	NA	NA	NA	March-December 1988	01/03/1988	NA	W	Cocchieri et al., 1990	1990	1988	1	7.34982E-05	7.34982E-05	NA	NA	NA	0.014684932	0.03	NA
49	IT	Gulf of Naples	37.1.3	Tyrrhenian	40.69191	14.17448	2	Bivalvia	Veneroidea	Pharidae	Ensis siliqua	Sword razor shell	Enssil	neritic epipelagic benthic	NA		NA	NA	NA	NA	NA	NA	Ace	LMW	Petrogenic	WW	NA	NA	0.027	0.027	NA	NA	NA	March-December 1988	01/03/1988	NA	W	Cocchieri et al., 1990	1990	1988	1	9.92225E-05	9.92225E-05	NA	NA	NA	0.014684932	0.06	NA
50	IT	Gulf of Naples	37.1.3	Tyrrhenian	40.69191	14.17448	2	Bivalvia	Veneroidea	Pharidae	Ensis siliqua	Sword razor shell	Enssil	neritic epipelagic benthic	NA		NA	NA	NA	NA	NA	NA	Acy	LMW	Petrogenic	WW	NA	0.02	0.025	0.025	NA	NA	NA	March-December 1988	01/03/1988	NA	W	Cocchieri et al., 1990	1990	1988	1	NA	NA	NA	NA	NA	0.014684932	NA	NA
51	IT	Gulf of Naples	37.1.3	Tyrrhenian	40.69191	14.17448	2	Bivalvia	Veneroidea	Pharidae	Ensis siliqua	Sword razor shell	Enssil	neritic epipelagic benthic	NA		NA	NA	NA	NA	NA	NA	Ant	LMW	Petrogenic	WW	NA	0.001	0.002	0.002	NA	NA	NA	March-December 1988	01/03/1988	NA	W	Cocchieri et al., 1990	1990	1988	1	1.46996E-06	1.46996E-06	NA	NA	NA	0.014684932	0.3	NA
52	IT	Gulf of Naples	37.1.3	Tyrrhenian	40.69191	14.17448	2	Bivalvia	Veneroidea	Pharidae	Ensis siliqua	Sword razor shell	Enssil	neritic epipelagic benthic	NA		NA	NA	NA	NA	NA	NA	BaA	HMW	Pyrolitic	WW	NA	NA	0.004	0.004	NA	NA	NA	March-December 1988	01/03/1988	NA	W	Cocchieri et al., 1990	1990	1988	1	NA	NA	NA	NA	1.05837E-06	0.014684932	NA	1.2
53	IT	Gulf of Naples	37.1.3	Tyrrhenian	40.69191	14.17448	2	Bivalvia	Veneroidea	Pharidae	Ensis siliqua	Sword razor shell	Enssil	neritic epipelagic benthic	NA		NA	NA	NA	NA	NA	NA	BaP	HMW	Pyrolitic	WW	NA	NA	0.005	0.005	NA	NA	NA	March-December 1988	01/03/1988	NA	W	Cocchieri et al., 1990	1990	1988	1	0.003674908	0.003674908	NA	NA	3.19717E-06	0.014684932	0.0003	2.9
54	IT	Gulf of Naples	37.1.3	Tyrrhenian	40.69191	14.17448	2	Bivalvia	Veneroidea	Pharidae	Ensis siliqua	Sword razor shell	Enssil	neritic epipelagic benthic	NA		NA	NA	NA	NA	NA	NA	BbF	HMW	Pyrolitic	WW	NA	NA	0.026	0.026	NA	NA	NA	March-December 1988	01/03/1988	NA	W	Cocchieri et al., 1990	1990	1988	1	NA	NA	NA	NA	6.87943E-06	0.014684932	NA	1.2
55	IT	Gulf of Naples	37.1.3	Tyrrhenian	40.69191	14.17448	2	Bivalvia	Veneroidea	Pharidae	Ensis siliqua	Sword razor shell	Enssil	neritic epipelagic benthic	NA		NA	NA	NA	NA	NA	NA	BghiP	HMW	Pyrolitic	WW	NA	NA	0.007	0.007	NA	NA	NA	March-December 1988	01/03/1988	NA	W	Cocchieri et al., 1990	1990	1988	1	NA	NA	NA	NA	NA	0.014684932	NA	NA
56	IT	Gulf of Naples	37.1.3	Tyrrhenian	40.69191	14.17448	2	Bivalvia	Veneroidea	Pharidae	Ensis siliqua	Sword razor shell	Enssil	neritic epipelagic benthic	NA		NA	NA	NA	NA	NA	NA	BkF	HMW	Pyrolitic	WW	NA	NA	0.025	0.025	NA	NA	NA	March-December 1988	01/03/1988	NA	W	Cocchieri et al., 1990	1990	1988	1	NA	NA	NA	NA	6.61483E-06	0.014684932	NA	1.2
57	IT	Gulf of Naples	37.1.3	Tyrrhenian	40.69191	14.17448	2	Bivalvia	Veneroidea	Pharidae	Ensis siliqua	Sword razor shell	Enssil	neritic epipelagic benthic	NA		NA	NA	NA	NA	NA	NA	Chr	HMW	Pyrolitic	WW	NA	NA	0.013	0.013	NA	NA	NA	March-December 1988	01/03/1988	NA	W	Cocchieri et al., 1990	1990	1988	1	NA	NA	NA	NA	1.2654E-06	0.014684932	NA	0.441455329
58	IT	Gulf of Naples	37.1.3	Tyrrhenian	40.69191	14.17448	2	Bivalvia	Veneroidea	Pharidae	Ensis siliqua	Sword razor shell	Enssil	neritic epipelagic benthic	NA		NA	NA	NA	NA	NA	NA	DahA	HMW	Pyrolitic	WW	NA	NA	<LOD	NA	NA	NA	NA	March-December 1988	01/03/1988	NA	W	Cocchieri et al., 1990	1990	1988	1	NA	NA	NA	NA	NA	0.014684932	NA	4.1
59	IT	Gulf of Naples	37.1.3	Tyrrhenian	40.69191	14.17448	2	Bivalvia	Veneroidea	Pharidae	Ensis siliqua	Sword razor shell	Enssil	neritic epipelagic benthic	NA		NA	NA	NA	NA	NA	NA	Fl	LMW	Petrogenic	WW	NA	NA	0.017	0.017	NA	NA	NA	March-December 1988	01/03/1988	NA	W	Cocchieri et al., 1990	1990	1988	1	9.37101E-05	9.37101E-05	NA	NA	NA	0.014684932	0.04	NA
60	IT	Gulf of Naples	37.1.3	Tyrrhenian	40.69191	14.17448	2	Bivalvia	Veneroidea	Pharidae	Ensis siliqua	Sword razor shell	Enssil	neritic epipelagic benthic	NA		NA	NA	NA	NA	NA	NA	Flu	MMW	Pyrolitic	WW	NA	NA	0.022	0.022	NA	NA	NA	March-December 1988	01/03/1988	NA	W	Cocchieri et al., 1990	1990	1988	1	0.000121272	0.000121272	NA	NA	NA	0.014684932	0.04	NA
61	IT	Gulf of Naples	37.1.3	Tyrrhenian	40.69191	14.17448	2	Bivalvia	Veneroidea	Pharidae	Ensis siliqua	Sword razor shell	Enssil	neritic epipelagic benthic	NA		NA	NA	NA	NA	NA	NA	InP	HMW	Pyrolitic	WW	NA	NA	0.004	0.004	NA	NA	NA	March-December 1988	01/03/1988	NA	W	Cocchieri et al., 1990	1990	1988	1	NA	NA	NA	NA	1.05837E-06	0.014684932	NA	1.2
62	IT	Gulf of Naples	37.1.3	Tyrrhenian	40.69191	14.17448	2	Bivalvia	Veneroidea	Pharidae	Ensis siliqua	Sword razor shell	Enssil	neritic epipelagic benthic	NA		NA	NA	NA	NA	NA	NA	Nap	LMW	Petrogenic	WW	NA	NA	0.02	0.02	NA	NA	NA	March-December 1988	01/03/1988	NA	W	Cocchieri et al., 1990	1990	1988	1	0.000220494	0.000220494	NA	NA	1.94677E-06	0.014684932	0.02	0.441455329
63	IT	Gulf of Naples	37.1.3	Tyrrhenian	40.69191	14.17448	2	Bivalvia	Veneroidea	Pharidae	Ensis siliqua	Sword razor shell	Enssil	neritic epipelagic benthic	NA		NA	NA	NA	NA	NA	NA	Phe	LMW	Petrogenic	WW	NA	NA	0.002	0.002	NA	NA	NA	March-December 1988	01/03/1988	NA	W	Cocchieri et al., 1990	1990	1988	1	NA	NA	NA	NA	NA	0.014684932	NA	NA
64	IT	Gulf of Naples	37.1.3	Tyrrhenian	40.69191	14.17448	2	Bivalvia	Veneroidea	Pharidae	Ensis siliqua	Sword razor shell	Enssil	neritic epipelagic benthic	NA		NA	NA	NA	NA	NA	NA	Pyr	MMW	Pyrolitic	WW	NA	NA	<LOD	NA	NA	NA	NA	March-December 1988	01/03/1988	NA	W	Cocchieri et al., 1990	1990	1988	1	NA	NA	NA	NA	NA	0.014684932	0.03	NA
65	IT	Gulf of Naples	37.1.3	Tyrrhenian	40.69191	14.17448	2	Bivalvia	Mytiloida	Mytilidae	Mytilus edulis	Blue mussel	Mytedu	neritic epipelagic benthic	2.00	SLB	NA	NA	NA	NA	NA	NA	Ace	LMW	Petrogenic	WW	NA	NA	0.035	0.035	NA	NA	NA	March-December 1988	01/03/1988	NA	W	Cocchieri et al., 1990	1990	1988	1	0.000128622	0.000128622	NA	NA	NA	0.014684932	0.06	NA
66	IT	Gulf of Naples	37.1.3	Tyrrhenian	40.69191	14.17448	2	Bivalvia	Mytiloida	Mytilidae	Mytilus edulis	Blue mussel	Mytedu	neritic epipelagic benthic	2.00	SLB	NA	NA	NA	NA	NA	NA	Acy	LMW	Petrogenic	WW	NA	0.02	0.06	0.06	NA	NA	NA	March-December 1988	01/03/1988	NA	W	Cocchieri et al., 1990	1990	1988	1	NA	NA	NA	NA	NA	0.014684932	NA	NA
67	IT	Gulf of Naples	37.1.3	Tyrrhenian	40.69191	14.17448	2	Bivalvia	Mytiloida	Mytilidae	Mytilus edulis	Blue mussel	Mytedu	neritic epipelagic benthic	2.00	SLB	NA	NA	NA	NA	NA	NA	Ant	LMW	Petrogenic	WW	NA	0.001	0.005	0.005	NA	NA	NA	March-December 1988	01/03/1988	NA	W	Cocchieri et al., 1990	1990	1988	1	3.67491E-06	3.67491E-06	NA	NA	NA	0.014684932	0.3	NA
68	IT	Gulf of Naples	37.1.3	Tyrrhenian	40.69191	14.17448	2	Bivalvia	Mytiloida	Mytilidae	Mytilus edulis	Blue mussel	Mytedu	neritic epipelagic benthic	2.00		NA	NA	NA	NA	NA	NA	BaA	HMW	Pyrolitic	WW	NA	NA	0.029	0.029	NA	NA	NA	March-December 1988	01/03/1988	NA	W	Cocchieri et al., 1990	1990	1988	1	NA	NA	NA	NA	7.67321E-06	0.014684932	NA	1.2
69	IT	Gulf of Naples	37.1.3	Tyrrhenian	40.69191	14.17448	2	Bivalvia	Mytiloida	Mytilidae	Mytilus edulis	Blue mussel	Mytedu	neritic epipelagic benthic	2.00		NA	NA	NA	NA	NA	NA	BaP	HMW	Pyrolitic	WW	NA	NA	0.005	0.005	NA	NA	NA	March-December 1988	01/03/1988	NA	W	Cocchieri et al., 1990	1990	1988	1	0.003674908	0.003674908	NA	NA	3.19717E-06	0.014684932	0.0003	2.9
70	IT	Gulf of Naples	37.1.3	Tyrrhenian	40.69191	14.17448	2	Bivalvia	Mytiloida	Mytilidae	Mytilus edulis	Blue mussel	Mytedu	neritic epipelagic benthic	2.00		NA	NA	NA	NA	NA	NA	BbF	HMW	Pyrolitic	WW	NA	NA	0.046	0.046	NA	NA	NA	March-December 1988	01/03/1988	NA	W	Cocchieri et al., 1990	1990	1988	1	NA	NA	NA	NA	1.21713E-05	0.014684932	NA	1.2
71	IT	Gulf of Naples	37.1.3	Tyrrhenian	40.69191	14.17448	2	Bivalvia	Mytiloida	Mytilidae	Mytilus edulis	Blue mussel	Mytedu	neritic epipelagic benthic	2.00		NA	NA	NA	NA	NA	NA	BghiP	HMW	Pyrolitic	WW	NA	NA	0.022	0.022	NA	NA	NA	March-December 1988	01/03/1988	NA	W	Cocchieri et al., 1990	1990	1988	1	NA	NA	NA	NA	NA	0.014684932	NA	NA
72	IT	Gulf of Naples	37.1.3	Tyrrhenian	40.69191	14.17448	2	Bivalvia	Mytiloida	Mytilidae	Mytilus edulis	Blue mussel	Mytedu	neritic epipelagic benthic	2.00		NA	NA	NA	NA	NA	NA	BkF	HMW	Pyrolitic	WW	NA	NA	0.004	0.004	NA	NA	NA	March-December 1988	01/03/1988	NA	W	Cocchieri et al., 1990	1990	1988	1	NA	NA	NA	NA	1.05837E-06	0.014684932	NA	1.2
73	IT	Gulf of Naples	37.1.3	Tyrrhenian	40.69191	14.17448	2	Bivalvia	Mytiloida	Mytilidae	Mytilus edulis	Blue mussel	Mytedu	neritic epipelagic benthic	2.00		NA	NA	NA	NA	NA	NA	Chr	HMW	Pyrolitic	WW	NA	NA	0.013	0.013	NA	NA	NA	March-December 1988	01/03/1988	NA	W	Cocchieri et al., 1990	1990	1988	1	NA	NA	NA	NA	1.2654E-06	0.014684932	NA	0.441455329
74	IT	Gulf of Naples	37.1.3	Tyrrhenian	40.69191	14.17448	2	Bivalvia	Mytiloida	Mytilidae	Mytilus edulis	Blue mussel	Mytedu	neritic epipelagic benthic	2.00		NA	NA	NA	NA	NA	NA	DahA	HMW	Pyrolitic	WW	NA	NA	0.02	0.02	NA	NA	NA	March-December 1988	01/03/1988	NA	W	Cocchieri et al., 1990	1990	1988	1	NA	NA	NA	NA	1.80805E-05	0.014684932	NA	4.1
75	IT	Gulf of Naples	37.1.3	Tyrrhenian	40.69191	14.17448	2	Bivalvia	Mytiloida	Mytilidae	Mytilus edulis	Blue mussel	Mytedu	neritic epipelagic benthic	2.00	SLB	NA	NA	NA	NA	NA	NA	Fl	LMW	Petrogenic	WW	NA	NA	0.005	0.005	NA	NA	NA	March-December 1988	01/03/1988	NA	W	Cocchieri et al., 1990	1990	1988	1	2.75618E-05	2.75618E-05	NA	NA	NA	0.014684932	0.04	NA
76	IT	Gulf of Naples	37.1.3	Tyrrhenian	40.69191	14.17448	2	Bivalvia	Mytiloida	Mytilidae	Mytilus edulis	Blue mussel	Mytedu	neritic epipelagic benthic	2.00	SLB	NA	NA	NA	NA	NA	NA	Flu	MMW	Pyrolitic	WW	NA	NA	0.021	0.021	NA	NA	NA	March-December 1988	01/03/1988	NA	W	Cocchieri et al., 1990	1990	1988	1	0.00011576	0.00011576	NA	NA	NA	0.014684932	0.04	NA
77	IT	Gulf of Naples	37.1.3	Tyrrhenian	40.69191	14.17448	2	Bivalvia	Mytiloida	Mytilidae	Mytilus edulis	Blue mussel	Mytedu	neritic epipelagic benthic	2.00		NA	NA	NA	NA	NA	NA	InP	HMW	Pyrolitic	WW	NA	NA	0.002	0.002	NA	NA	NA	March-December 1988	01/03/1988	NA	W	Cocchieri et al., 1990	1990	1988	1	NA	NA	NA	NA	5.29187E-07	0.014684932	NA	1.2
78	IT	Gulf of Naples	37.1.3	Tyrrhenian	40.69191	14.17448	2	Bivalvia	Mytiloida	Mytilidae	Mytilus edulis	Blue mussel	Mytedu	neritic epipelagic benthic	2.00	SLB	NA	NA	NA	NA	NA	NA	Nap	LMW	Petrogenic	WW	NA	NA	<LOD	NA	NA	NA	NA	March-December 1988	01/03/1988	NA	W	Cocchieri et al., 1990	1990	1988	1	NA	NA	NA	NA	NA	0.014684932	0.02	0.441455329
79	IT	Gulf of Naples	37.1.3	Tyrrhenian	40.69191	14.17448	2	Bivalvia	Mytiloida	Mytilidae	Mytilus edulis	Blue mussel	Mytedu	neritic epipelagic benthic	2.00	SLB	NA	NA	NA	NA	NA	NA	Phe	LMW	Petrogenic	WW	NA	NA	0.004	0.004	NA	NA	NA	March-December 1988	01/03/1988	NA	W	Cocchieri et al., 1990	1990	1988	1	NA	NA	NA	NA	NA	0.014684932	NA	NA
80	IT	Gulf of Naples	37.1.3	Tyrrhenian	40.69191	14.17448	2	Bivalvia	Mytiloida	Mytilidae	Mytilus edulis	Blue mussel	Mytedu	neritic epipelagic benthic	2.00	SLB	NA	NA	NA	NA	NA	NA	Pyr	MMW	Pyrolitic	WW	NA	NA	0.024	0.024	NA	NA	NA	March-December 1988	01/03/1988	NA	W	Cocchieri et al., 1990	1990	1988	1	0.000176396	0.000176396	NA	NA	NA	0.014684932	0.03	NA
81	IT	Gulf of Naples	37.1.3	Tyrrhenian	40.69191	14.17448	2	Bivalvia	Veneroida	Veneridae	Ruditapes decussatus	Grooved carpet shell	Ruddec	neritic epipelagic benthic	2.00	SLB	NA	NA	NA	NA	NA	NA	Ace	LMW	Petrogenic	WW	NA	NA	<LOD	NA	NA	NA	NA	March-December 1988	01/03/1988	NA	W	Cocchieri et al., 1990	1990	1988	1	NA	NA	NA	NA	NA	0.014684932	0.06	NA
82	IT	Gulf of Naples	37.1.3	Tyrrhenian	40.69191	14.17448	2	Bivalvia	Veneroida	Veneridae	Ruditapes decussatus	Grooved carpet shell	Ruddec	neritic epipelagic benthic	2.00	SLB	NA	NA	NA	NA	NA	NA	Acy	LMW	Petrogenic	WW	NA	0.02	0.062	0.062	NA	NA	NA	March-December 1988	01/03/1988	NA	W	Cocchieri et al., 1990	1990	1988	1	NA	NA	NA	NA	NA	0.014684932	NA	NA
83	IT	Gulf of Naples	37.1.3	Tyrrhenian	40.69191	14.17448	2	Bivalvia	Veneroida	Veneridae	Ruditapes decussatus	Grooved carpet shell	Ruddec	neritic epipelagic benthic	2.00	SLB	NA	NA	NA	NA	NA	NA	Ant	LMW	Petrogenic	WW	NA	0.001	0.003	0.003	NA	NA	NA	March-December 1988	01/03/1988	NA	W	Cocchieri et al., 1990	1990	1988	1	2.20494E-06	2.20494E-06	NA	NA	NA	0.014684932	0.3	NA
84	IT	Gulf of Naples	37.1.3	Tyrrhenian	40.69191	14.17448	2	Bivalvia	Veneroida	Veneridae	Ruditapes decussatus	Grooved carpet shell	Ruddec	neritic epipelagic benthic	2.00	SLB	NA	NA	NA	NA	NA	NA	BaA	HMW	Pyrolitic	WW	NA	NA	0.024	0.024	NA	NA	NA	March-December 1988	01/03/1988	NA	W	Cocchieri et al., 1990	1990	1988	1	NA	NA	NA	NA	6.35024E-06	0.014684932	NA	1.2
85	IT	Gulf of Naples	37.1.3	Tyrrhenian	40.69191	14.17448	2	Bivalvia	Veneroida	Veneridae	Ruditapes decussatus	Grooved carpet shell	Ruddec	neritic epipelagic benthic	2.00	SLB	NA	NA	NA	NA	NA	NA	BaP	HMW	Pyrolitic	WW	NA	NA	0.006	0.006	NA	NA	NA	March-December 1988	01/03/1988	NA	W	Cocchieri et al., 1990	1990	1988	1	0.004409889	0.004409889	NA	NA	3.8366E-06	0.014684932	0.0003	2.9
86	IT	Gulf of Naples	37.1.3	Tyrrhenian	40.69191	14.17448	2	Bivalvia	Veneroida	Veneridae	Ruditapes decussatus	Grooved carpet shell	Ruddec	neritic epipelagic benthic	2.00	SLB	NA	NA	NA	NA	NA	NA	BbF	HMW	Pyrolitic	WW	NA	NA	0.003	0.003	NA	NA	NA	March-December 1988	01/03/1988	NA	W	Cocchieri et al., 1990	1990	1988	1	NA	NA	NA	NA	7.9378E-07	0.014684932	NA	1.2
87	IT	Gulf of Naples	37.1.3	Tyrrhenian	40.69191	14.17448	2	Bivalvia	Veneroida	Veneridae	Ruditapes decussatus	Grooved carpet shell	Ruddec	neritic epipelagic benthic	2.00	SLB	NA	NA	NA	NA	NA	NA	BghiP	HMW	Pyrolitic	WW	NA	NA	0.006	0.006	NA	NA	NA	March-December 1988	01/03/1988	NA	W	Cocchieri et al., 1990	1990	1988	1	NA	NA	NA	NA	NA	0.014684932	NA	NA
88	IT	Gulf of Naples	37.1.3	Tyrrhenian	40.69191	14.17448	2	Bivalvia	Veneroida	Veneridae	Ruditapes decussatus	Grooved carpet shell	Ruddec	neritic epipelagic benthic	2.00	SLB	NA	NA	NA	NA	NA	NA	BkF	HMW	Pyrolitic	WW	NA	NA	0.02	0.02	NA	NA	NA	March-December 1988	01/03/1988	NA	W	Cocchieri et al., 1990	1990	1988	1	NA	NA	NA	NA	5.29187E-06	0.014684932	NA	1.2
89	IT	Gulf of Naples	37.1.3	Tyrrhenian	40.69191	14.17448	2	Bivalvia	Veneroida	Veneridae	Ruditapes decussatus	Grooved carpet shell	Ruddec	neritic epipelagic benthic	2.00	SLB	NA	NA	NA	NA	NA	NA	Chr	HMW	Pyrolitic	WW	NA	NA	0.006	0.006	NA	NA	NA	March-December 1988	01/03/1988	NA	W	Cocchieri et al., 1990	1990	1988	1	NA	NA	NA	NA	5.84031E-07	0.014684932	NA	0.441455329
90	IT	Gulf of Naples	37.1.3	Tyrrhenian	40.69191	14.17448	2	Bivalvia	Veneroida	Veneridae	Ruditapes decussatus	Grooved carpet shell	Ruddec	neritic epipelagic benthic	2.00	SLB	NA	NA	NA	NA	NA	NA	DahA	HMW	Pyrolitic	WW	NA	NA	0.011	0.011	NA	NA	NA	March-December 1988	01/03/1988	NA	W	Cocchieri et al., 1990	1990	1988	1	NA	NA	NA	NA	9.9443E-06	0.014684932	NA	4.1
91	IT	Gulf of Naples	37.1.3	Tyrrhenian	40.69191	14.17448	2	Bivalvia	Veneroida	Veneridae	Ruditapes decussatus	Grooved carpet shell	Ruddec	neritic epipelagic benthic	2.00	SLB	NA	NA	NA	NA	NA	NA	Fl	LMW	Petrogenic	WW	NA	NA	0.006	0.006	NA	NA	NA	March-December 1988	01/03/1988	NA	W	Cocchieri et al., 1990	1990	1988	1	3.30742E-05	3.30742E-05	NA	NA	NA	0.014684932	0.04	NA
92	IT	Gulf of Naples	37.1.3	Tyrrhenian	40.69191	14.17448	2	Bivalvia	Veneroida	Veneridae	Ruditapes decussatus	Grooved carpet shell	Ruddec	neritic epipelagic benthic	2.00	SLB	NA	NA	NA	NA	NA	NA	Flu	MMW	Pyrolitic	WW	NA	NA	0.007	0.007	NA	NA	NA	March-December 1988	01/03/1988	NA	W	Cocchieri et al., 1990	1990	1988	1	3.85865E-05	3.85865E-05	NA	NA	NA	0.014684932	0.04	NA
93	IT	Gulf of Naples	37.1.3	Tyrrhenian	40.69191	14.17448	2	Bivalvia	Veneroida	Veneridae	Ruditapes decussatus	Grooved carpet shell	Ruddec	neritic epipelagic benthic	2.00	SLB	NA	NA	NA	NA	NA	NA	InP	HMW	Pyrolitic	WW	NA	NA	0.005	0.005	NA	NA	NA	March-December 1988	01/03/1988	NA	W	Cocchieri et al., 1990	1990	1988	1	NA	NA	NA	NA	1.32297E-06	0.014684932	NA	1.2
94	IT	Gulf of Naples	37.1.3	Tyrrhenian	40.69191	14.17448	2	Bivalvia	Veneroida	Veneridae	Ruditapes decussatus	Grooved carpet shell	Ruddec	neritic epipelagic benthic	2.00	SLB	NA	NA	NA	NA	NA	NA	Nap	LMW	Petrogenic	WW	NA	NA	0.032	0.032	NA	NA	NA	March-December 1988	01/03/1988	NA	W	Cocchieri et al., 1990	1990	1988	1	0.000352791	0.000352791	NA	NA	3.11483E-06	0.014684932	0.02	0.441455329
95	IT	Gulf of Naples	37.1.3	Tyrrhenian	40.69191	14.17448	2	Bivalvia	Veneroida	Veneridae	Ruditapes decussatus	Grooved carpet shell	Ruddec	neritic epipelagic benthic	2.00	SLB	NA	NA	NA	NA	NA	NA	Phe	LMW	Petrogenic	WW	NA	NA	0.007	0.007	NA	NA	NA	March-December 1988	01/03/1988	NA	W	Cocchieri et al., 1990	1990	1988	1	NA	NA	NA	NA	NA	0.014684932	NA	NA
96	IT	Gulf of Naples	37.1.3	Tyrrhenian	40.69191	14.17448	2	Bivalvia	Veneroida	Veneridae	Ruditapes decussatus	Grooved carpet shell	Ruddec	neritic epipelagic benthic	2.00	SLB	NA	NA	NA	NA	NA	NA	Pyr	MMW	Pyrolitic	WW	NA	NA	0.01	0.01	NA	NA	NA	March-December 1988	01/03/1988	NA	W	Cocchieri et al., 1990	1990	1988	1	7.34982E-05	7.34982E-05	NA	NA	NA	0.014684932	0.03	NA
97	IT	Gulf of Naples	37.1.3	Tyrrhenian	40.69191	14.17448	2	Bivalvia	Veneroida	Veneridae	Venus verrucosa	Warty venus	Venver	neritic epipelagic benthic	2.00	SLB	NA	NA	NA	NA	NA	NA	Ace	LMW	Petrogenic	WW	NA	NA	<LOD	NA	NA	NA	NA	March-December 1988	01/03/1988	NA	W	Cocchieri et al., 1990	1990	1988	1	NA	NA	NA	NA	NA	0.014684932	0.06	NA
98	IT	Gulf of Naples	37.1.3	Tyrrhenian	40.69191	14.17448	2	Bivalvia	Veneroida	Veneridae	Venus verrucosa	Warty venus	Venver	neritic epipelagic benthic	2.00	SLB	NA	NA	NA	NA	NA	NA	Acy	LMW	Petrogenic	WW	NA	0.02	0.03	0.03	NA	NA	NA	March-December 1988	01/03/1988	NA	W	Cocchieri et al., 1990	1990	1988	1	NA	NA	NA	NA	NA	0.014684932	NA	NA
99	IT	Gulf of Naples	37.1.3	Tyrrhenian	40.69191	14.17448	2	Bivalvia	Veneroida	Veneridae	Venus verrucosa	Warty venus	Venver	neritic epipelagic benthic	2.00	SLB	NA	NA	NA	NA	NA	NA	Ant	LMW	Petrogenic	WW	NA	0.001	0.002	0.002	NA	NA	NA	March-December 1988	01/03/1988	NA	W	Cocchieri et al., 1990	1990	1988	1	1.46996E-06	1.46996E-06	NA	NA	NA	0.014684932	0.3	NA
100	IT	Gulf of Naples	37.1.3	Tyrrhenian	40.69191	14.17448	2	Bivalvia	Veneroida	Veneridae	Venus verrucosa	Warty venus	Venver	neritic epipelagic benthic	2.00	SLB	NA	NA	NA	NA	NA	NA	BaA	HMW	Pyrolitic	WW	NA	NA	0.037	0.037	NA	NA	NA	March-December 1988	01/03/1988	NA	W	Cocchieri et al., 1990	1990	1988	1	NA	NA	NA	NA	9.78995E-06	0.014684932	NA	1.2
101	IT	Gulf of Naples	37.1.3	Tyrrhenian	40.69191	14.17448	2	Bivalvia	Veneroida	Veneridae	Venus verrucosa	Warty venus	Venver	neritic epipelagic benthic	2.00	SLB	NA	NA	NA	NA	NA	NA	BaP	HMW	Pyrolitic	WW	NA	NA	<LOD	NA	NA	NA	NA	March-December 1988	01/03/1988	NA	W	Cocchieri et al., 1990	1990	1988	1	NA	NA	NA	NA	NA	0.014684932	0.0003	2.9
102	IT	Gulf of Naples	37.1.3	Tyrrhenian	40.69191	14.17448	2	Bivalvia	Veneroida	Veneridae	Venus verrucosa	Warty venus	Venver	neritic epipelagic benthic	2.00	SLB	NA	NA	NA	NA	NA	NA	BbF	HMW	Pyrolitic	WW	NA	NA	0.005	0.005	NA	NA	NA	March-December 1988	01/03/1988	NA	W	Cocchieri et al., 1990	1990	1988	1	NA	NA	NA	NA	1.32297E-06	0.014684932	NA	1.2
103	IT	Gulf of Naples	37.1.3	Tyrrhenian	40.69191	14.17448	2	Bivalvia	Veneroida	Veneridae	Venus verrucosa	Warty venus	Venver	neritic epipelagic benthic	2.00	SLB	NA	NA	NA	NA	NA	NA	BghiP	HMW	Pyrolitic	WW	NA	NA	0.01	0.01	NA	NA	NA	March-December 1988	01/03/1988	NA	W	Cocchieri et al., 1990	1990	1988	1	NA	NA	NA	NA	NA	0.014684932	NA	NA
104	IT	Gulf of Naples	37.1.3	Tyrrhenian	40.69191	14.17448	2	Bivalvia	Veneroida	Veneridae	Venus verrucosa	Warty venus	Venver	neritic epipelagic benthic	2.00	SLB	NA	NA	NA	NA	NA	NA	BkF	HMW	Pyrolitic	WW	NA	NA	0.003	0.003	NA	NA	NA	March-December 1988	01/03/1988	NA	W	Cocchieri et al., 1990	1990	1988	1	NA	NA	NA	NA	7.9378E-07	0.014684932	NA	1.2
105	IT	Gulf of Naples	37.1.3	Tyrrhenian	40.69191	14.17448	2	Bivalvia	Veneroida	Veneridae	Venus verrucosa	Warty venus	Venver	neritic epipelagic benthic	2.00	SLB	NA	NA	NA	NA	NA	NA	Chr	HMW	Pyrolitic	WW	NA	NA	0.017	0.017	NA	NA	NA	March-December 1988	01/03/1988	NA	W	Cocchieri et al., 1990	1990	1988	1	NA	NA	NA	NA	1.65475E-06	0.014684932	NA	0.441455329
106	IT	Gulf of Naples	37.1.3	Tyrrhenian	40.69191	14.17448	2	Bivalvia	Veneroida	Veneridae	Venus verrucosa	Warty venus	Venver	neritic epipelagic benthic	2.00	SLB	NA	NA	NA	NA	NA	NA	DahA	HMW	Pyrolitic	WW	NA	NA	0.004	0.004	NA	NA	NA	March-December 1988	01/03/1988	NA	W	Cocchieri et al., 1990	1990	1988	1	NA	NA	NA	NA	3.61611E-06	0.014684932	NA	4.1
107	IT	Gulf of Naples	37.1.3	Tyrrhenian	40.69191	14.17448	2	Bivalvia	Veneroida	Veneridae	Venus verrucosa	Warty venus	Venver	neritic epipelagic benthic	2.00	SLB	NA	NA	NA	NA	NA	NA	Fl	LMW	Petrogenic	WW	NA	NA	0.005	0.005	NA	NA	NA	March-December 1988	01/03/1988	NA	W	Cocchieri et al., 1990	1990	1988	1	2.75618E-05	2.75618E-05	NA	NA	NA	0.014684932	0.04	NA
108	IT	Gulf of Naples	37.1.3	Tyrrhenian	40.69191	14.17448	2	Bivalvia	Veneroida	Veneridae	Venus verrucosa	Warty venus	Venver	neritic epipelagic benthic	2.00	SLB	NA	NA	NA	NA	NA	NA	Flu	MMW	Pyrolitic	WW	NA	NA	0.011	0.011	NA	NA	NA	March-December 1988	01/03/1988	NA	W	Cocchieri et al., 1990	1990	1988	1	6.0636E-05	6.0636E-05	NA	NA	NA	0.014684932	0.04	NA
109	IT	Gulf of Naples	37.1.3	Tyrrhenian	40.69191	14.17448	2	Bivalvia	Veneroida	Veneridae	Venus verrucosa	Warty venus	Venver	neritic epipelagic benthic	2.00	SLB	NA	NA	NA	NA	NA	NA	InP	HMW	Pyrolitic	WW	NA	NA	0.021	0.021	NA	NA	NA	March-December 1988	01/03/1988	NA	W	Cocchieri et al., 1990	1990	1988	1	NA	NA	NA	NA	5.55646E-06	0.014684932	NA	1.2
110	IT	Gulf of Naples	37.1.3	Tyrrhenian	40.69191	14.17448	2	Bivalvia	Veneroida	Veneridae	Venus verrucosa	Warty venus	Venver	neritic epipelagic benthic	2.00	SLB	NA	NA	NA	NA	NA	NA	Nap	LMW	Petrogenic	WW	NA	NA	0.025	0.025	NA	NA	NA	March-December 1988	01/03/1988	NA	W	Cocchieri et al., 1990	1990	1988	1	0.000275618	0.000275618	NA	NA	2.43346E-06	0.014684932	0.02	0.441455329
111	IT	Gulf of Naples	37.1.3	Tyrrhenian	40.69191	14.17448	2	Bivalvia	Veneroida	Veneridae	Venus verrucosa	Warty venus	Venver	neritic epipelagic benthic	2.00	SLB	NA	NA	NA	NA	NA	NA	Phe	LMW	Petrogenic	WW	NA	NA	0.005	0.005	NA	NA	NA	March-December 1988	01/03/1988	NA	W	Cocchieri et al., 1990	1990	1988	1	NA	NA	NA	NA	NA	0.014684932	NA	NA
112	IT	Gulf of Naples	37.1.3	Tyrrhenian	40.69191	14.17448	2	Bivalvia	Veneroida	Veneridae	Venus verrucosa	Warty venus	Venver	neritic epipelagic benthic	2.00	SLB	NA	NA	NA	NA	NA	NA	Pyr	MMW	Pyrolitic	WW	NA	NA	0.01	0.01	NA	NA	NA	March-December 1988	01/03/1988	NA	W	Cocchieri et al., 1990	1990	1988	1	7.34982E-05	7.34982E-05	NA	NA	NA	0.014684932	0.03	NA
113	IT	Gulf of Naples	37.1.3	Tyrrhenian	40.69191	14.17448	2	Actinopterygii	Perciformes	Labridae	Coris julis	Mediterranean rainbow wrasse	Corjul	neritic epipelagic reef-associated	3.24	FB	NA	NA	15	NA	NA	NA	Ace	LMW	Petrogenic	WW	NA	NA	<LOD	NA	NA	NA	NA	March-December 1988	01/03/1988	NA	W	Cocchieri et al., 1990	1990	1988	1	NA	NA	NA	NA	NA	0.014849315	0.06	NA
114	IT	Gulf of Naples	37.1.3	Tyrrhenian	40.69191	14.17448	2	Actinopterygii	Perciformes	Labridae	Coris julis	Mediterranean rainbow wrasse	Corjul	neritic epipelagic reef-associated	3.24	FB	NA	NA	15	NA	NA	NA	Acy	LMW	Petrogenic	WW	NA	0.02	0.016	0.016	NA	NA	NA	March-December 1988	01/03/1988	NA	W	Cocchieri et al., 1990	1990	1988	1	NA	NA	NA	NA	NA	0.014849315	NA	NA
115	IT	Gulf of Naples	37.1.3	Tyrrhenian	40.69191	14.17448	2	Actinopterygii	Perciformes	Labridae	Coris julis	Mediterranean rainbow wrasse	Corjul	neritic epipelagic reef-associated	3.24	FB	NA	NA	15	NA	NA	NA	Ant	LMW	Petrogenic	WW	NA	0.001	0.004	0.004	NA	NA	NA	March-December 1988	01/03/1988	NA	W	Cocchieri et al., 1990	1990	1988	1	2.97284E-06	2.97284E-06	NA	NA	NA	0.014849315	0.3	NA
116	IT	Gulf of Naples	37.1.3	Tyrrhenian	40.69191	14.17448	2	Actinopterygii	Perciformes	Labridae	Coris julis	Mediterranean rainbow wrasse	Corjul	neritic epipelagic reef-associated	3.24	FB	NA	NA	15	NA	NA	NA	BaA	HMW	Pyrolitic	WW	NA	NA	0.005	0.005	NA	NA	NA	March-December 1988	01/03/1988	NA	W	Cocchieri et al., 1990	1990	1988	1	NA	NA	NA	NA	1.33778E-06	0.014849315	NA	1.2
117	IT	Gulf of Naples	37.1.3	Tyrrhenian	40.69191	14.17448	2	Actinopterygii	Perciformes	Labridae	Coris julis	Mediterranean rainbow wrasse	Corjul	neritic epipelagic reef-associated	3.24	FB	NA	NA	15	NA	NA	NA	BaP	HMW	Pyrolitic	WW	NA	NA	0.007	0.007	NA	NA	NA	March-December 1988	01/03/1988	NA	W	Cocchieri et al., 1990	1990	1988	1	0.005202463	0.005202463	NA	NA	4.52614E-06	0.014849315	0.0003	2.9
118	IT	Gulf of Naples	37.1.3	Tyrrhenian	40.69191	14.17448	2	Actinopterygii	Perciformes	Labridae	Coris julis	Mediterranean rainbow wrasse	Corjul	neritic epipelagic reef-associated	3.24	FB	NA	NA	15	NA	NA	NA	BbF	HMW	Pyrolitic	WW	NA	NA	0.01	0.01	NA	NA	NA	March-December 1988	01/03/1988	NA	W	Cocchieri et al., 1990	1990	1988	1	NA	NA	NA	NA	2.67555E-06	0.014849315	NA	1.2
119	IT	Gulf of Naples	37.1.3	Tyrrhenian	40.69191	14.17448	2	Actinopterygii	Perciformes	Labridae	Coris julis	Mediterranean rainbow wrasse	Corjul	neritic epipelagic reef-associated	3.24	FB	NA	NA	15	NA	NA	NA	BghiP	HMW	Pyrolitic	WW	NA	NA	0.03	0.03	NA	NA	NA	March-December 1988	01/03/1988	NA	W	Cocchieri et al., 1990	1990	1988	1	NA	NA	NA	NA	NA	0.014849315	NA	NA
120	IT	Gulf of Naples	37.1.3	Tyrrhenian	40.69191	14.17448	2	Actinopterygii	Perciformes	Labridae	Coris julis	Mediterranean rainbow wrasse	Corjul	neritic epipelagic reef-associated	3.24	FB	NA	NA	15	NA	NA	NA	BkF	HMW	Pyrolitic	WW	NA	NA	<LOD	NA	NA	NA	NA	March-December 1988	01/03/1988	NA	W	Cocchieri et al., 1990	1990	1988	1	NA	NA	NA	NA	NA	0.014849315	NA	1.2
121	IT	Gulf of Naples	37.1.3	Tyrrhenian	40.69191	14.17448	2	Actinopterygii	Perciformes	Labridae	Coris julis	Mediterranean rainbow wrasse	Corjul	neritic epipelagic reef-associated	3.24	FB	NA	NA	15	NA	NA	NA	Chr	HMW	Pyrolitic	WW	NA	NA	<LOD	NA	NA	NA	NA	March-December 1988	01/03/1988	NA	W	Cocchieri et al., 1990	1990	1988	1	NA	NA	NA	NA	NA	0.014849315	NA	0.441455329
122	IT	Gulf of Naples	37.1.3	Tyrrhenian	40.69191	14.17448	2	Actinopterygii	Perciformes	Labridae	Coris julis	Mediterranean rainbow wrasse	Corjul	neritic epipelagic reef-associated	3.24	FB	NA	NA	15	NA	NA	NA	DahA	HMW	Pyrolitic	WW	NA	NA	0.025	0.025	NA	NA	NA	March-December 1988	01/03/1988	NA	W	Cocchieri et al., 1990	1990	1988	1	NA	NA	NA	NA	2.28537E-05	0.014849315	NA	4.1
123	IT	Gulf of Naples	37.1.3	Tyrrhenian	40.69191	14.17448	2	Actinopterygii	Perciformes	Labridae	Coris julis	Mediterranean rainbow wrasse	Corjul	neritic epipelagic reef-associated	3.24	FB	NA	NA	15	NA	NA	NA	Fl	LMW	Petrogenic	WW	NA	NA	<LOD	NA	NA	NA	NA	March-December 1988	01/03/1988	NA	W	Cocchieri et al., 1990	1990	1988	1	NA	NA	NA	NA	NA	0.014849315	0.04	NA
124	IT	Gulf of Naples	37.1.3	Tyrrhenian	40.69191	14.17448	2	Actinopterygii	Perciformes	Labridae	Coris julis	Mediterranean rainbow wrasse	Corjul	neritic epipelagic reef-associated	3.24	FB	NA	NA	15	NA	NA	NA	Flu	MMW	Pyrolitic	WW	NA	NA	0.008	0.008	NA	NA	NA	March-December 1988	01/03/1988	NA	W	Cocchieri et al., 1990	1990	1988	1	4.45925E-05	4.45925E-05	NA	NA	NA	0.014849315	0.04	NA
125	IT	Gulf of Naples	37.1.3	Tyrrhenian	40.69191	14.17448	2	Actinopterygii	Perciformes	Labridae	Coris julis	Mediterranean rainbow wrasse	Corjul	neritic epipelagic reef-associated	3.24	FB	NA	NA	15	NA	NA	NA	InP	HMW	Pyrolitic	WW	NA	NA	0.059	0.059	NA	NA	NA	March-December 1988	01/03/1988	NA	W	Cocchieri et al., 1990	1990	1988	1	NA	NA	NA	NA	1.57858E-05	0.014849315	NA	1.2
126	IT	Gulf of Naples	37.1.3	Tyrrhenian	40.69191	14.17448	2	Actinopterygii	Perciformes	Labridae	Coris julis	Mediterranean rainbow wrasse	Corjul	neritic epipelagic reef-associated	3.24	FB	NA	NA	15	NA	NA	NA	Nap	LMW	Petrogenic	WW	NA	NA	<LOD	NA	NA	NA	NA	March-December 1988	01/03/1988	NA	W	Cocchieri et al., 1990	1990	1988	1	NA	NA	NA	NA	NA	0.014849315	0.02	0.441455329
127	IT	Gulf of Naples	37.1.3	Tyrrhenian	40.69191	14.17448	2	Actinopterygii	Perciformes	Labridae	Coris julis	Mediterranean rainbow wrasse	Corjul	neritic epipelagic reef-associated	3.24	FB	NA	NA	15	NA	NA	NA	Phe	LMW	Petrogenic	WW	NA	NA	0.006	0.006	NA	NA	NA	March-December 1988	01/03/1988	NA	W	Cocchieri et al., 1990	1990	1988	1	NA	NA	NA	NA	NA	0.014849315	NA	NA
128	IT	Gulf of Naples	37.1.3	Tyrrhenian	40.69191	14.17448	2	Actinopterygii	Perciformes	Labridae	Coris julis	Mediterranean rainbow wrasse	Corjul	neritic epipelagic reef-associated	3.24	FB	NA	NA	15	NA	NA	NA	Pyr	MMW	Pyrolitic	WW	NA	NA	0.014	0.014	NA	NA	NA	March-December 1988	01/03/1988	NA	W	Cocchieri et al., 1990	1990	1988	1	0.000104049	0.000104049	NA	NA	NA	0.014849315	0.03	NA
129	IT	Gulf of Naples	37.1.3	Tyrrhenian	40.69191	14.17448	2	Actinopterygii	Clupeiformes	Engraulidae	Engraulis encrasicolus	European anchovy	Engenc	neritic epipelagic	3.12	FB	NA	NA	8	NA	NA	NA	Ace	LMW	Petrogenic	WW	NA	NA	0.264	0.264	NA	NA	NA	March-December 1988	01/03/1988	NA	W	Cocchieri et al., 1990	1990	1988	1	0.000981036	0.000981036	NA	NA	NA	0.014849315	0.06	NA
130	IT	Gulf of Naples	37.1.3	Tyrrhenian	40.69191	14.17448	2	Actinopterygii	Clupeiformes	Engraulidae	Engraulis encrasicolus	European anchovy	Engenc	neritic epipelagic	3.12	FB	NA	NA	8	NA	NA	NA	Acy	LMW	Petrogenic	WW	NA	0.02	0.148	0.148	NA	NA	NA	March-December 1988	01/03/1988	NA	W	Cocchieri et al., 1990	1990	1988	1	NA	NA	NA	NA	NA	0.014849315	NA	NA
131	IT	Gulf of Naples	37.1.3	Tyrrhenian	40.69191	14.17448	2	Actinopterygii	Clupeiformes	Engraulidae	Engraulis encrasicolus	European anchovy	Engenc	neritic epipelagic	3.12	FB	NA	NA	8	NA	NA	NA	Ant	LMW	Petrogenic	WW	NA	0.001	0.008	0.008	NA	NA	NA	March-December 1988	01/03/1988	NA	W	Cocchieri et al., 1990	1990	1988	1	5.94567E-06	5.94567E-06	NA	NA	NA	0.014849315	0.3	NA
132	IT	Gulf of Naples	37.1.3	Tyrrhenian	40.69191	14.17448	2	Actinopterygii	Clupeiformes	Engraulidae	Engraulis encrasicolus	European anchovy	Engenc	neritic epipelagic	3.12	FB	NA	NA	8	NA	NA	NA	BaA	HMW	Pyrolitic	WW	NA	NA	0.473	0.473	NA	NA	NA	March-December 1988	01/03/1988	NA	W	Cocchieri et al., 1990	1990	1988	1	NA	NA	NA	NA	0.000126554	0.014849315	NA	1.2
133	IT	Gulf of Naples	37.1.3	Tyrrhenian	40.69191	14.17448	2	Actinopterygii	Clupeiformes	Engraulidae	Engraulis encrasicolus	European anchovy	Engenc	neritic epipelagic	3.12	FB	NA	NA	8	NA	NA	NA	BaP	HMW	Pyrolitic	WW	NA	NA	0.043	0.043	NA	NA	NA	March-December 1988	01/03/1988	NA	W	Cocchieri et al., 1990	1990	1988	1	0.031957985	0.031957985	NA	NA	2.78034E-05	0.014849315	0.0003	2.9
134	IT	Gulf of Naples	37.1.3	Tyrrhenian	40.69191	14.17448	2	Actinopterygii	Clupeiformes	Engraulidae	Engraulis encrasicolus	European anchovy	Engenc	neritic epipelagic	3.12	FB	NA	NA	8	NA	NA	NA	BbF	HMW	Pyrolitic	WW	NA	NA	0.345	0.345	NA	NA	NA	March-December 1988	01/03/1988	NA	W	Cocchieri et al., 1990	1990	1988	1	NA	NA	NA	NA	9.23066E-05	0.014849315	NA	1.2
135	IT	Gulf of Naples	37.1.3	Tyrrhenian	40.69191	14.17448	2	Actinopterygii	Clupeiformes	Engraulidae	Engraulis encrasicolus	European anchovy	Engenc	neritic epipelagic	3.12	FB	NA	NA	8	NA	NA	NA	BghiP	HMW	Pyrolitic	WW	NA	NA	0.031	0.031	NA	NA	NA	March-December 1988	01/03/1988	NA	W	Cocchieri et al., 1990	1990	1988	1	NA	NA	NA	NA	NA	0.014849315	NA	NA
136	IT	Gulf of Naples	37.1.3	Tyrrhenian	40.69191	14.17448	2	Actinopterygii	Clupeiformes	Engraulidae	Engraulis encrasicolus	European anchovy	Engenc	neritic epipelagic	3.12	FB	NA	NA	8	NA	NA	NA	BkF	HMW	Pyrolitic	WW	NA	NA	0.144	0.144	NA	NA	NA	March-December 1988	01/03/1988	NA	W	Cocchieri et al., 1990	1990	1988	1	NA	NA	NA	NA	3.8528E-05	0.014849315	NA	1.2
137	IT	Gulf of Naples	37.1.3	Tyrrhenian	40.69191	14.17448	2	Actinopterygii	Clupeiformes	Engraulidae	Engraulis encrasicolus	European anchovy	Engenc	neritic epipelagic	3.12	FB	NA	NA	8	NA	NA	NA	Chr	HMW	Pyrolitic	WW	NA	NA	0.086	0.086	NA	NA	NA	March-December 1988	01/03/1988	NA	W	Cocchieri et al., 1990	1990	1988	1	NA	NA	NA	NA	8.46481E-06	0.014849315	NA	0.441455329
138	IT	Gulf of Naples	37.1.3	Tyrrhenian	40.69191	14.17448	2	Actinopterygii	Clupeiformes	Engraulidae	Engraulis encrasicolus	European anchovy	Engenc	neritic epipelagic	3.12	FB	NA	NA	8	NA	NA	NA	DahA	HMW	Pyrolitic	WW	NA	NA	0.007	0.007	NA	NA	NA	March-December 1988	01/03/1988	NA	W	Cocchieri et al., 1990	1990	1988	1	NA	NA	NA	NA	6.39903E-06	0.014849315	NA	4.1
139	IT	Gulf of Naples	37.1.3	Tyrrhenian	40.69191	14.17448	2	Actinopterygii	Clupeiformes	Engraulidae	Engraulis encrasicolus	European anchovy	Engenc	neritic epipelagic	3.12	FB	NA	NA	8	NA	NA	NA	Fl	LMW	Petrogenic	WW	NA	NA	0.02	0.02	NA	NA	NA	March-December 1988	01/03/1988	NA	W	Cocchieri et al., 1990	1990	1988	1	0.000111481	0.000111481	NA	NA	NA	0.014849315	0.04	NA
140	IT	Gulf of Naples	37.1.3	Tyrrhenian	40.69191	14.17448	2	Actinopterygii	Clupeiformes	Engraulidae	Engraulis encrasicolus	European anchovy	Engenc	neritic epipelagic	3.12	FB	NA	NA	8	NA	NA	NA	Flu	MMW	Pyrolitic	WW	NA	NA	0.044	0.044	NA	NA	NA	March-December 1988	01/03/1988	NA	W	Cocchieri et al., 1990	1990	1988	1	0.000245259	0.000245259	NA	NA	NA	0.014849315	0.04	NA
141	IT	Gulf of Naples	37.1.3	Tyrrhenian	40.69191	14.17448	2	Actinopterygii	Clupeiformes	Engraulidae	Engraulis encrasicolus	European anchovy	Engenc	neritic epipelagic	3.12	FB	NA	NA	8	NA	NA	NA	InP	HMW	Pyrolitic	WW	NA	NA	0.185	0.185	NA	NA	NA	March-December 1988	01/03/1988	NA	W	Cocchieri et al., 1990	1990	1988	1	NA	NA	NA	NA	4.94977E-05	0.014849315	NA	1.2
142	IT	Gulf of Naples	37.1.3	Tyrrhenian	40.69191	14.17448	2	Actinopterygii	Clupeiformes	Engraulidae	Engraulis encrasicolus	European anchovy	Engenc	neritic epipelagic	3.12	FB	NA	NA	8	NA	NA	NA	Nap	LMW	Petrogenic	WW	NA	NA	0.063	0.063	NA	NA	NA	March-December 1988	01/03/1988	NA	W	Cocchieri et al., 1990	1990	1988	1	0.000702332	0.000702332	NA	NA	6.20097E-06	0.014849315	0.02	0.441455329
143	IT	Gulf of Naples	37.1.3	Tyrrhenian	40.69191	14.17448	2	Actinopterygii	Clupeiformes	Engraulidae	Engraulis encrasicolus	European anchovy	Engenc	neritic epipelagic	3.12	FB	NA	NA	8	NA	NA	NA	Phe	LMW	Petrogenic	WW	NA	NA	0.02	0.02	NA	NA	NA	March-December 1988	01/03/1988	NA	W	Cocchieri et al., 1990	1990	1988	1	NA	NA	NA	NA	NA	0.014849315	NA	NA
144	IT	Gulf of Naples	37.1.3	Tyrrhenian	40.69191	14.17448	2	Actinopterygii	Clupeiformes	Engraulidae	Engraulis encrasicolus	European anchovy	Engenc	neritic epipelagic	3.12	FB	NA	NA	8	NA	NA	NA	Pyr	MMW	Pyrolitic	WW	NA	NA	0.048	0.048	NA	NA	NA	March-December 1988	01/03/1988	NA	W	Cocchieri et al., 1990	1990	1988	1	0.00035674	0.00035674	NA	NA	NA	0.014849315	0.03	NA
145	IT	Gulf of Naples	37.1.3	Tyrrhenian	40.69191	14.17448	2	Actinopterygii	Perciformes	Labridae	Labrus mixtus	Cuckoo wrasse	Labmix	neritic epipelagic reef-associated	3.9	FB	NA	NA	47	NA	NA	NA	Ace	LMW	Petrogenic	WW	NA	NA	<LOD	NA	NA	NA	NA	March-December 1988	01/03/1988	NA	W	Cocchieri et al., 1990	1990	1988	1	NA	NA	NA	NA	NA	0.014849315	0.06	NA
146	IT	Gulf of Naples	37.1.3	Tyrrhenian	40.69191	14.17448	2	Actinopterygii	Perciformes	Labridae	Labrus mixtus	Cuckoo wrasse	Labmix	neritic epipelagic reef-associated	3.9	FB	NA	NA	47	NA	NA	NA	Acy	LMW	Petrogenic	WW	NA	0.02	<LOD	0.01	NA	NA	NA	March-December 1988	01/03/1988	NA	W	Cocchieri et al., 1990	1990	1988	1	NA	NA	NA	NA	NA	0.014849315	NA	NA
147	IT	Gulf of Naples	37.1.3	Tyrrhenian	40.69191	14.17448	2	Actinopterygii	Perciformes	Labridae	Labrus mixtus	Cuckoo wrasse	Labmix	neritic epipelagic reef-associated	3.9	FB	NA	NA	47	NA	NA	NA	Ant	LMW	Petrogenic	WW	NA	0.001	0.007	0.007	NA	NA	NA	March-December 1988	01/03/1988	NA	W	Cocchieri et al., 1990	1990	1988	1	5.20246E-06	5.20246E-06	NA	NA	NA	0.014849315	0.3	NA
148	IT	Gulf of Naples	37.1.3	Tyrrhenian	40.69191	14.17448	2	Actinopterygii	Perciformes	Labridae	Labrus mixtus	Cuckoo wrasse	Labmix	neritic epipelagic reef-associated	3.9	FB	NA	NA	47	NA	NA	NA	BaA	HMW	Pyrolitic	WW	NA	NA	0.008	0.008	NA	NA	NA	March-December 1988	01/03/1988	NA	W	Cocchieri et al., 1990	1990	1988	1	NA	NA	NA	NA	2.14044E-06	0.014849315	NA	1.2
149	IT	Gulf of Naples	37.1.3	Tyrrhenian	40.69191	14.17448	2	Actinopterygii	Perciformes	Labridae	Labrus mixtus	Cuckoo wrasse	Labmix	neritic epipelagic reef-associated	3.9	FB	NA	NA	47	NA	NA	NA	BaP	HMW	Pyrolitic	WW	NA	NA	<LOD	NA	NA	NA	NA	March-December 1988	01/03/1988	NA	W	Cocchieri et al., 1990	1990	1988	1	NA	NA	NA	NA	NA	0.014849315	0.0003	2.9
150	IT	Gulf of Naples	37.1.3	Tyrrhenian	40.69191	14.17448	2	Actinopterygii	Perciformes	Labridae	Labrus mixtus	Cuckoo wrasse	Labmix	neritic epipelagic reef-associated	3.9	FB	NA	NA	47	NA	NA	NA	BbF	HMW	Pyrolitic	WW	NA	NA	0.009	0.009	NA	NA	NA	March-December 1988	01/03/1988	NA	W	Cocchieri et al., 1990	1990	1988	1	NA	NA	NA	NA	2.408E-06	0.014849315	NA	1.2
151	IT	Gulf of Naples	37.1.3	Tyrrhenian	40.69191	14.17448	2	Actinopterygii	Perciformes	Labridae	Labrus mixtus	Cuckoo wrasse	Labmix	neritic epipelagic reef-associated	3.9	FB	NA	NA	47	NA	NA	NA	BghiP	HMW	Pyrolitic	WW	NA	NA	0.012	0.012	NA	NA	NA	March-December 1988	01/03/1988	NA	W	Cocchieri et al., 1990	1990	1988	1	NA	NA	NA	NA	NA	0.014849315	NA	NA
152	IT	Gulf of Naples	37.1.3	Tyrrhenian	40.69191	14.17448	2	Actinopterygii	Perciformes	Labridae	Labrus mixtus	Cuckoo wrasse	Labmix	neritic epipelagic reef-associated	3.9	FB	NA	NA	47	NA	NA	NA	BkF	HMW	Pyrolitic	WW	NA	NA	0.005	0.005	NA	NA	NA	March-December 1988	01/03/1988	NA	W	Cocchieri et al., 1990	1990	1988	1	NA	NA	NA	NA	1.33778E-06	0.014849315	NA	1.2
153	IT	Gulf of Naples	37.1.3	Tyrrhenian	40.69191	14.17448	2	Actinopterygii	Perciformes	Labridae	Labrus mixtus	Cuckoo wrasse	Labmix	neritic epipelagic reef-associated	3.9	FB	NA	NA	47	NA	NA	NA	Chr	HMW	Pyrolitic	WW	NA	NA	0.009	0.009	NA	NA	NA	March-December 1988	01/03/1988	NA	W	Cocchieri et al., 1990	1990	1988	1	NA	NA	NA	NA	8.85853E-07	0.014849315	NA	0.441455329
154	IT	Gulf of Naples	37.1.3	Tyrrhenian	40.69191	14.17448	2	Actinopterygii	Perciformes	Labridae	Labrus mixtus	Cuckoo wrasse	Labmix	neritic epipelagic reef-associated	3.9	FB	NA	NA	47	NA	NA	NA	DahA	HMW	Pyrolitic	WW	NA	NA	0.005	0.005	NA	NA	NA	March-December 1988	01/03/1988	NA	W	Cocchieri et al., 1990	1990	1988	1	NA	NA	NA	NA	4.57074E-06	0.014849315	NA	4.1
155	IT	Gulf of Naples	37.1.3	Tyrrhenian	40.69191	14.17448	2	Actinopterygii	Perciformes	Labridae	Labrus mixtus	Cuckoo wrasse	Labmix	neritic epipelagic reef-associated	3.9	FB	NA	NA	47	NA	NA	NA	Fl	LMW	Petrogenic	WW	NA	NA	<LOD	NA	NA	NA	NA	March-December 1988	01/03/1988	NA	W	Cocchieri et al., 1990	1990	1988	1	NA	NA	NA	NA	NA	0.014849315	0.04	NA
156	IT	Gulf of Naples	37.1.3	Tyrrhenian	40.69191	14.17448	2	Actinopterygii	Perciformes	Labridae	Labrus mixtus	Cuckoo wrasse	Labmix	neritic epipelagic reef-associated	3.9	FB	NA	NA	47	NA	NA	NA	Flu	MMW	Pyrolitic	WW	NA	NA	0.029	0.029	NA	NA	NA	March-December 1988	01/03/1988	NA	W	Cocchieri et al., 1990	1990	1988	1	0.000161648	0.000161648	NA	NA	NA	0.014849315	0.04	NA
157	IT	Gulf of Naples	37.1.3	Tyrrhenian	40.69191	14.17448	2	Actinopterygii	Perciformes	Labridae	Labrus mixtus	Cuckoo wrasse	Labmix	neritic epipelagic reef-associated	3.9	FB	NA	NA	47	NA	NA	NA	InP	HMW	Pyrolitic	WW	NA	NA	0.004	0.004	NA	NA	NA	March-December 1988	01/03/1988	NA	W	Cocchieri et al., 1990	1990	1988	1	NA	NA	NA	NA	1.07022E-06	0.014849315	NA	1.2
158	IT	Gulf of Naples	37.1.3	Tyrrhenian	40.69191	14.17448	2	Actinopterygii	Perciformes	Labridae	Labrus mixtus	Cuckoo wrasse	Labmix	neritic epipelagic reef-associated	3.9	FB	NA	NA	47	NA	NA	NA	Nap	LMW	Petrogenic	WW	NA	NA	<LOD	NA	NA	NA	NA	March-December 1988	01/03/1988	NA	W	Cocchieri et al., 1990	1990	1988	1	NA	NA	NA	NA	NA	0.014849315	0.02	0.441455329
159	IT	Gulf of Naples	37.1.3	Tyrrhenian	40.69191	14.17448	2	Actinopterygii	Perciformes	Labridae	Labrus mixtus	Cuckoo wrasse	Labmix	neritic epipelagic reef-associated	3.9	FB	NA	NA	47	NA	NA	NA	Phe	LMW	Petrogenic	WW	NA	NA	0.006	0.006	NA	NA	NA	March-December 1988	01/03/1988	NA	W	Cocchieri et al., 1990	1990	1988	1	NA	NA	NA	NA	NA	0.014849315	NA	NA
160	IT	Gulf of Naples	37.1.3	Tyrrhenian	40.69191	14.17448	2	Actinopterygii	Perciformes	Labridae	Labrus mixtus	Cuckoo wrasse	Labmix	neritic epipelagic reef-associated	3.9	FB	NA	NA	47	NA	NA	NA	Pyr	MMW	Pyrolitic	WW	NA	NA	<LOD	NA	NA	NA	NA	March-December 1988	01/03/1988	NA	W	Cocchieri et al., 1990	1990	1988	1	NA	NA	NA	NA	NA	0.014849315	0.03	NA
161	IT	Gulf of Naples	37.1.3	Tyrrhenian	40.69191	14.17448	2	Actinopterygii	Perciformes	Sparidae	Pagellus erythrinus	Common pandora	Pagery	neritic mesopelagic benthic	3.46	FB	NA	NA	30	NA	NA	NA	Ace	LMW	Petrogenic	WW	NA	NA	<LOD	NA	NA	NA	NA	March-December 1988	01/03/1988	NA	W	Cocchieri et al., 1990	1990	1988	1	NA	NA	NA	NA	NA	0.014849315	0.06	NA
162	IT	Gulf of Naples	37.1.3	Tyrrhenian	40.69191	14.17448	2	Actinopterygii	Perciformes	Sparidae	Pagellus erythrinus	Common pandora	Pagery	neritic mesopelagic benthic	3.46	FB	NA	NA	30	NA	NA	NA	Acy	LMW	Petrogenic	WW	NA	0.02	0.03	0.03	NA	NA	NA	March-December 1988	01/03/1988	NA	W	Cocchieri et al., 1990	1990	1988	1	NA	NA	NA	NA	NA	0.014849315	NA	NA
163	IT	Gulf of Naples	37.1.3	Tyrrhenian	40.69191	14.17448	2	Actinopterygii	Perciformes	Sparidae	Pagellus erythrinus	Common pandora	Pagery	neritic mesopelagic benthic	3.46	FB	NA	NA	30	NA	NA	NA	Ant	LMW	Petrogenic	WW	NA	0.001	0.002	0.002	NA	NA	NA	March-December 1988	01/03/1988	NA	W	Cocchieri et al., 1990	1990	1988	1	1.48642E-06	1.48642E-06	NA	NA	NA	0.014849315	0.3	NA
164	IT	Gulf of Naples	37.1.3	Tyrrhenian	40.69191	14.17448	2	Actinopterygii	Perciformes	Sparidae	Pagellus erythrinus	Common pandora	Pagery	neritic mesopelagic benthic	3.46	FB	NA	NA	30	NA	NA	NA	BaA	HMW	Pyrolitic	WW	NA	NA	0.006	0.006	NA	NA	NA	March-December 1988	01/03/1988	NA	W	Cocchieri et al., 1990	1990	1988	1	NA	NA	NA	NA	1.60533E-06	0.014849315	NA	1.2
165	IT	Gulf of Naples	37.1.3	Tyrrhenian	40.69191	14.17448	2	Actinopterygii	Perciformes	Sparidae	Pagellus erythrinus	Common pandora	Pagery	neritic mesopelagic benthic	3.46	FB	NA	NA	30	NA	NA	NA	BaP	HMW	Pyrolitic	WW	NA	NA	0.003	0.003	NA	NA	NA	March-December 1988	01/03/1988	NA	W	Cocchieri et al., 1990	1990	1988	1	0.002229627	0.002229627	NA	NA	1.93978E-06	0.014849315	0.0003	2.9
166	IT	Gulf of Naples	37.1.3	Tyrrhenian	40.69191	14.17448	2	Actinopterygii	Perciformes	Sparidae	Pagellus erythrinus	Common pandora	Pagery	neritic mesopelagic benthic	3.46	FB	NA	NA	30	NA	NA	NA	BbF	HMW	Pyrolitic	WW	NA	NA	<LOD	NA	NA	NA	NA	March-December 1988	01/03/1988	NA	W	Cocchieri et al., 1990	1990	1988	1	NA	NA	NA	NA	NA	0.014849315	NA	1.2
167	IT	Gulf of Naples	37.1.3	Tyrrhenian	40.69191	14.17448	2	Actinopterygii	Perciformes	Sparidae	Pagellus erythrinus	Common pandora	Pagery	neritic mesopelagic benthic	3.46	FB	NA	NA	30	NA	NA	NA	BghiP	HMW	Pyrolitic	WW	NA	NA	0.01	0.01	NA	NA	NA	March-December 1988	01/03/1988	NA	W	Cocchieri et al., 1990	1990	1988	1	NA	NA	NA	NA	NA	0.014849315	NA	NA
168	IT	Gulf of Naples	37.1.3	Tyrrhenian	40.69191	14.17448	2	Actinopterygii	Perciformes	Sparidae	Pagellus erythrinus	Common pandora	Pagery	neritic mesopelagic benthic	3.46	FB	NA	NA	30	NA	NA	NA	BkF	HMW	Pyrolitic	WW	NA	NA	0.011	0.011	NA	NA	NA	March-December 1988	01/03/1988	NA	W	Cocchieri et al., 1990	1990	1988	1	NA	NA	NA	NA	2.94311E-06	0.014849315	NA	1.2
169	IT	Gulf of Naples	37.1.3	Tyrrhenian	40.69191	14.17448	2	Actinopterygii	Perciformes	Sparidae	Pagellus erythrinus	Common pandora	Pagery	neritic mesopelagic benthic	3.46	FB	NA	NA	30	NA	NA	NA	Chr	HMW	Pyrolitic	WW	NA	NA	0.007	0.007	NA	NA	NA	March-December 1988	01/03/1988	NA	W	Cocchieri et al., 1990	1990	1988	1	NA	NA	NA	NA	6.88996E-07	0.014849315	NA	0.441455329
170	IT	Gulf of Naples	37.1.3	Tyrrhenian	40.69191	14.17448	2	Actinopterygii	Perciformes	Sparidae	Pagellus erythrinus	Common pandora	Pagery	neritic mesopelagic benthic	3.46	FB	NA	NA	30	NA	NA	NA	DahA	HMW	Pyrolitic	WW	NA	NA	0.015	0.015	NA	NA	NA	March-December 1988	01/03/1988	NA	W	Cocchieri et al., 1990	1990	1988	1	NA	NA	NA	NA	1.37122E-05	0.014849315	NA	4.1
171	IT	Gulf of Naples	37.1.3	Tyrrhenian	40.69191	14.17448	2	Actinopterygii	Perciformes	Sparidae	Pagellus erythrinus	Common pandora	Pagery	neritic mesopelagic benthic	3.46	FB	NA	NA	30	NA	NA	NA	Fl	LMW	Petrogenic	WW	NA	NA	<LOD	NA	NA	NA	NA	March-December 1988	01/03/1988	NA	W	Cocchieri et al., 1990	1990	1988	1	NA	NA	NA	NA	NA	0.014849315	0.04	NA
172	IT	Gulf of Naples	37.1.3	Tyrrhenian	40.69191	14.17448	2	Actinopterygii	Perciformes	Sparidae	Pagellus erythrinus	Common pandora	Pagery	neritic mesopelagic benthic	3.46	FB	NA	NA	30	NA	NA	NA	Flu	MMW	Pyrolitic	WW	NA	NA	0.019	0.019	NA	NA	NA	March-December 1988	01/03/1988	NA	W	Cocchieri et al., 1990	1990	1988	1	0.000105907	0.000105907	NA	NA	NA	0.014849315	0.04	NA
173	IT	Gulf of Naples	37.1.3	Tyrrhenian	40.69191	14.17448	2	Actinopterygii	Perciformes	Sparidae	Pagellus erythrinus	Common pandora	Pagery	neritic mesopelagic benthic	3.46	FB	NA	NA	30	NA	NA	NA	InP	HMW	Pyrolitic	WW	NA	NA	<LOD	NA	NA	NA	NA	March-December 1988	01/03/1988	NA	W	Cocchieri et al., 1990	1990	1988	1	NA	NA	NA	NA	NA	0.014849315	NA	1.2
174	IT	Gulf of Naples	37.1.3	Tyrrhenian	40.69191	14.17448	2	Actinopterygii	Perciformes	Sparidae	Pagellus erythrinus	Common pandora	Pagery	neritic mesopelagic benthic	3.46	FB	NA	NA	30	NA	NA	NA	Nap	LMW	Petrogenic	WW	NA	NA	<LOD	NA	NA	NA	NA	March-December 1988	01/03/1988	NA	W	Cocchieri et al., 1990	1990	1988	1	NA	NA	NA	NA	NA	0.014849315	0.02	0.441455329
175	IT	Gulf of Naples	37.1.3	Tyrrhenian	40.69191	14.17448	2	Actinopterygii	Perciformes	Sparidae	Pagellus erythrinus	Common pandora	Pagery	neritic mesopelagic benthic	3.46	FB	NA	NA	30	NA	NA	NA	Phe	LMW	Petrogenic	WW	NA	NA	0.003	0.003	NA	NA	NA	March-December 1988	01/03/1988	NA	W	Cocchieri et al., 1990	1990	1988	1	NA	NA	NA	NA	NA	0.014849315	NA	NA
176	IT	Gulf of Naples	37.1.3	Tyrrhenian	40.69191	14.17448	2	Actinopterygii	Perciformes	Sparidae	Pagellus erythrinus	Common pandora	Pagery	neritic mesopelagic benthic	3.46	FB	NA	NA	30	NA	NA	NA	Pyr	MMW	Pyrolitic	WW	NA	NA	<LOD	NA	NA	NA	NA	March-December 1988	01/03/1988	NA	W	Cocchieri et al., 1990	1990	1988	1	NA	NA	NA	NA	NA	0.014849315	0.03	NA
177	IT	Gulf of Naples	37.1.3	Tyrrhenian	40.69191	14.17448	2	Actinopterygii	Perciformes	Carangidae	Serranus cabrilla	Comber	Sercab	oceanic mesopelagic	3.68	FB	NA	NA	19	NA	NA	NA	Ace	LMW	Petrogenic	WW	NA	NA	0.043	0.043	NA	NA	NA	March-December 1988	01/03/1988	NA	W	Cocchieri et al., 1990	1990	1988	1	0.00015979	0.00015979	NA	NA	NA	0.014849315	0.06	NA
178	IT	Gulf of Naples	37.1.3	Tyrrhenian	40.69191	14.17448	2	Actinopterygii	Perciformes	Carangidae	Serranus cabrilla	Comber	Sercab	oceanic mesopelagic	3.68	FB	NA	NA	19	NA	NA	NA	Acy	LMW	Petrogenic	WW	NA	0.02	0.034	0.034	NA	NA	NA	March-December 1988	01/03/1988	NA	W	Cocchieri et al., 1990	1990	1988	1	NA	NA	NA	NA	NA	0.014849315	NA	NA
179	IT	Gulf of Naples	37.1.3	Tyrrhenian	40.69191	14.17448	2	Actinopterygii	Perciformes	Carangidae	Serranus cabrilla	Comber	Sercab	oceanic mesopelagic	3.68	FB	NA	NA	19	NA	NA	NA	Ant	LMW	Petrogenic	WW	NA	0.001	0.007	0.007	NA	NA	NA	March-December 1988	01/03/1988	NA	W	Cocchieri et al., 1990	1990	1988	1	5.20246E-06	5.20246E-06	NA	NA	NA	0.014849315	0.3	NA
180	IT	Gulf of Naples	37.1.3	Tyrrhenian	40.69191	14.17448	2	Actinopterygii	Perciformes	Carangidae	Serranus cabrilla	Comber	Sercab	oceanic mesopelagic	3.68	FB	NA	NA	19	NA	NA	NA	BaA	HMW	Pyrolitic	WW	NA	NA	0.037	0.037	NA	NA	NA	March-December 1988	01/03/1988	NA	W	Cocchieri et al., 1990	1990	1988	1	NA	NA	NA	NA	9.89954E-06	0.014849315	NA	1.2
181	IT	Gulf of Naples	37.1.3	Tyrrhenian	40.69191	14.17448	2	Actinopterygii	Perciformes	Carangidae	Serranus cabrilla	Comber	Sercab	oceanic mesopelagic	3.68	FB	NA	NA	19	NA	NA	NA	BaP	HMW	Pyrolitic	WW	NA	NA	0.013	0.013	NA	NA	NA	March-December 1988	01/03/1988	NA	W	Cocchieri et al., 1990	1990	1988	1	0.009661717	0.009661717	NA	NA	8.40569E-06	0.014849315	0.0003	2.9
182	IT	Gulf of Naples	37.1.3	Tyrrhenian	40.69191	14.17448	2	Actinopterygii	Perciformes	Carangidae	Serranus cabrilla	Comber	Sercab	oceanic mesopelagic	3.68	FB	NA	NA	19	NA	NA	NA	BbF	HMW	Pyrolitic	WW	NA	NA	0.06	0.06	NA	NA	NA	March-December 1988	01/03/1988	NA	W	Cocchieri et al., 1990	1990	1988	1	NA	NA	NA	NA	1.60533E-05	0.014849315	NA	1.2
183	IT	Gulf of Naples	37.1.3	Tyrrhenian	40.69191	14.17448	2	Actinopterygii	Perciformes	Carangidae	Serranus cabrilla	Comber	Sercab	oceanic mesopelagic	3.68	FB	NA	NA	19	NA	NA	NA	BghiP	HMW	Pyrolitic	WW	NA	NA	0.018	0.018	NA	NA	NA	March-December 1988	01/03/1988	NA	W	Cocchieri et al., 1990	1990	1988	1	NA	NA	NA	NA	NA	0.014849315	NA	NA
184	IT	Gulf of Naples	37.1.3	Tyrrhenian	40.69191	14.17448	2	Actinopterygii	Perciformes	Carangidae	Serranus cabrilla	Comber	Sercab	oceanic mesopelagic	3.68	FB	NA	NA	19	NA	NA	NA	BkF	HMW	Pyrolitic	WW	NA	NA	0.045	0.045	NA	NA	NA	March-December 1988	01/03/1988	NA	W	Cocchieri et al., 1990	1990	1988	1	NA	NA	NA	NA	1.204E-05	0.014849315	NA	1.2
185	IT	Gulf of Naples	37.1.3	Tyrrhenian	40.69191	14.17448	2	Actinopterygii	Perciformes	Carangidae	Serranus cabrilla	Comber	Sercab	oceanic mesopelagic	3.68	FB	NA	NA	19	NA	NA	NA	Chr	HMW	Pyrolitic	WW	NA	NA	<LOD	NA	NA	NA	NA	March-December 1988	01/03/1988	NA	W	Cocchieri et al., 1990	1990	1988	1	NA	NA	NA	NA	NA	0.014849315	NA	0.441455329
186	IT	Gulf of Naples	37.1.3	Tyrrhenian	40.69191	14.17448	2	Actinopterygii	Perciformes	Carangidae	Serranus cabrilla	Comber	Sercab	oceanic mesopelagic	3.68	FB	NA	NA	19	NA	NA	NA	DahA	HMW	Pyrolitic	WW	NA	NA	0.025	0.025	NA	NA	NA	March-December 1988	01/03/1988	NA	W	Cocchieri et al., 1990	1990	1988	1	NA	NA	NA	NA	2.28537E-05	0.014849315	NA	4.1
187	IT	Gulf of Naples	37.1.3	Tyrrhenian	40.69191	14.17448	2	Actinopterygii	Perciformes	Carangidae	Serranus cabrilla	Comber	Sercab	oceanic mesopelagic	3.68	FB	NA	NA	19	NA	NA	NA	Fl	LMW	Petrogenic	WW	NA	NA	<LOD	NA	NA	NA	NA	March-December 1988	01/03/1988	NA	W	Cocchieri et al., 1990	1990	1988	1	NA	NA	NA	NA	NA	0.014849315	0.04	NA
188	IT	Gulf of Naples	37.1.3	Tyrrhenian	40.69191	14.17448	2	Actinopterygii	Perciformes	Carangidae	Serranus cabrilla	Comber	Sercab	oceanic mesopelagic	3.68	FB	NA	NA	19	NA	NA	NA	Flu	MMW	Pyrolitic	WW	NA	NA	0.019	0.019	NA	NA	NA	March-December 1988	01/03/1988	NA	W	Cocchieri et al., 1990	1990	1988	1	0.000105907	0.000105907	NA	NA	NA	0.014849315	0.04	NA
189	IT	Gulf of Naples	37.1.3	Tyrrhenian	40.69191	14.17448	2	Actinopterygii	Perciformes	Carangidae	Serranus cabrilla	Comber	Sercab	oceanic mesopelagic	3.68	FB	NA	NA	19	NA	NA	NA	InP	HMW	Pyrolitic	WW	NA	NA	0.003	0.003	NA	NA	NA	March-December 1988	01/03/1988	NA	W	Cocchieri et al., 1990	1990	1988	1	NA	NA	NA	NA	8.02666E-07	0.014849315	NA	1.2
190	IT	Gulf of Naples	37.1.3	Tyrrhenian	40.69191	14.17448	2	Actinopterygii	Perciformes	Carangidae	Serranus cabrilla	Comber	Sercab	oceanic mesopelagic	3.68	FB	NA	NA	19	NA	NA	NA	Nap	LMW	Petrogenic	WW	NA	NA	0.004	0.004	NA	NA	NA	March-December 1988	01/03/1988	NA	W	Cocchieri et al., 1990	1990	1988	1	4.45925E-05	4.45925E-05	NA	NA	3.93712E-07	0.014849315	0.02	0.441455329
191	IT	Gulf of Naples	37.1.3	Tyrrhenian	40.69191	14.17448	2	Actinopterygii	Perciformes	Carangidae	Serranus cabrilla	Comber	Sercab	oceanic mesopelagic	3.68	FB	NA	NA	19	NA	NA	NA	Phe	LMW	Petrogenic	WW	NA	NA	0.006	0.006	NA	NA	NA	March-December 1988	01/03/1988	NA	W	Cocchieri et al., 1990	1990	1988	1	NA	NA	NA	NA	NA	0.014849315	NA	NA
192	IT	Gulf of Naples	37.1.3	Tyrrhenian	40.69191	14.17448	2	Actinopterygii	Perciformes	Carangidae	Serranus cabrilla	Comber	Sercab	oceanic mesopelagic	3.68	FB	NA	NA	19	NA	NA	NA	Pyr	MMW	Pyrolitic	WW	NA	NA	0.022	0.022	NA	NA	NA	March-December 1988	01/03/1988	NA	W	Cocchieri et al., 1990	1990	1988	1	0.000163506	0.000163506	NA	NA	NA	0.014849315	0.03	NA
193	IT	Gulf of Naples	37.1.3	Tyrrhenian	40.69191	14.17448	2	Actinopterygii	Perciformes	Carangidae	Trachurus trachurus	Atlantic horse mackerel	Tratra	oceanic mesopelagic	4.18	FB	NA	NA	44	NA	NA	NA	Ace	LMW	Petrogenic	WW	NA	NA	<LOD	NA	NA	NA	NA	March-December 1988	01/03/1988	NA	W	Cocchieri et al., 1990	1990	1988	1	NA	NA	NA	NA	NA	0.014849315	0.06	NA
194	IT	Gulf of Naples	37.1.3	Tyrrhenian	40.69191	14.17448	2	Actinopterygii	Perciformes	Carangidae	Trachurus trachurus	Atlantic horse mackerel	Tratra	oceanic mesopelagic	4.18	FB	NA	NA	44	NA	NA	NA	Acy	LMW	Petrogenic	WW	NA	0.02	0.056	0.056	NA	NA	NA	March-December 1988	01/03/1988	NA	W	Cocchieri et al., 1990	1990	1988	1	NA	NA	NA	NA	NA	0.014849315	NA	NA
195	IT	Gulf of Naples	37.1.3	Tyrrhenian	40.69191	14.17448	2	Actinopterygii	Perciformes	Carangidae	Trachurus trachurus	Atlantic horse mackerel	Tratra	oceanic mesopelagic	4.18	FB	NA	NA	44	NA	NA	NA	Ant	LMW	Petrogenic	WW	NA	0.001	0.004	0.004	NA	NA	NA	March-December 1988	01/03/1988	NA	W	Cocchieri et al., 1990	1990	1988	1	2.97284E-06	2.97284E-06	NA	NA	NA	0.014849315	0.3	NA
196	IT	Gulf of Naples	37.1.3	Tyrrhenian	40.69191	14.17448	2	Actinopterygii	Perciformes	Carangidae	Trachurus trachurus	Atlantic horse mackerel	Tratra	oceanic mesopelagic	4.18	FB	NA	NA	44	NA	NA	NA	BaA	HMW	Pyrolitic	WW	NA	NA	0.004	0.004	NA	NA	NA	March-December 1988	01/03/1988	NA	W	Cocchieri et al., 1990	1990	1988	1	NA	NA	NA	NA	1.07022E-06	0.014849315	NA	1.2
197	IT	Gulf of Naples	37.1.3	Tyrrhenian	40.69191	14.17448	2	Actinopterygii	Perciformes	Carangidae	Trachurus trachurus	Atlantic horse mackerel	Tratra	oceanic mesopelagic	4.18	FB	NA	NA	44	NA	NA	NA	BaP	HMW	Pyrolitic	WW	NA	NA	0.003	0.003	NA	NA	NA	March-December 1988	01/03/1988	NA	W	Cocchieri et al., 1990	1990	1988	1	0.002229627	0.002229627	NA	NA	1.93978E-06	0.014849315	0.0003	2.9
198	IT	Gulf of Naples	37.1.3	Tyrrhenian	40.69191	14.17448	2	Actinopterygii	Perciformes	Carangidae	Trachurus trachurus	Atlantic horse mackerel	Tratra	oceanic mesopelagic	4.18	FB	NA	NA	44	NA	NA	NA	BbF	HMW	Pyrolitic	WW	NA	NA	0.013	0.013	NA	NA	NA	March-December 1988	01/03/1988	NA	W	Cocchieri et al., 1990	1990	1988	1	NA	NA	NA	NA	3.47822E-06	0.014849315	NA	1.2
199	IT	Gulf of Naples	37.1.3	Tyrrhenian	40.69191	14.17448	2	Actinopterygii	Perciformes	Carangidae	Trachurus trachurus	Atlantic horse mackerel	Tratra	oceanic mesopelagic	4.18	FB	NA	NA	44	NA	NA	NA	BghiP	HMW	Pyrolitic	WW	NA	NA	<LOD	NA	NA	NA	NA	March-December 1988	01/03/1988	NA	W	Cocchieri et al., 1990	1990	1988	1	NA	NA	NA	NA	NA	0.014849315	NA	NA
200	IT	Gulf of Naples	37.1.3	Tyrrhenian	40.69191	14.17448	2	Actinopterygii	Perciformes	Carangidae	Trachurus trachurus	Atlantic horse mackerel	Tratra	oceanic mesopelagic	4.18	FB	NA	NA	44	NA	NA	NA	BkF	HMW	Pyrolitic	WW	NA	NA	0.011	0.011	NA	NA	NA	March-December 1988	01/03/1988	NA	W	Cocchieri et al., 1990	1990	1988	1	NA	NA	NA	NA	2.94311E-06	0.014849315	NA	1.2
201	IT	Gulf of Naples	37.1.3	Tyrrhenian	40.69191	14.17448	2	Actinopterygii	Perciformes	Carangidae	Trachurus trachurus	Atlantic horse mackerel	Tratra	oceanic mesopelagic	4.18	FB	NA	NA	44	NA	NA	NA	Chr	HMW	Pyrolitic	WW	NA	NA	0.002	0.002	NA	NA	NA	March-December 1988	01/03/1988	NA	W	Cocchieri et al., 1990	1990	1988	1	NA	NA	NA	NA	1.96856E-07	0.014849315	NA	0.441455329
202	IT	Gulf of Naples	37.1.3	Tyrrhenian	40.69191	14.17448	2	Actinopterygii	Perciformes	Carangidae	Trachurus trachurus	Atlantic horse mackerel	Tratra	oceanic mesopelagic	4.18	FB	NA	NA	44	NA	NA	NA	DahA	HMW	Pyrolitic	WW	NA	NA	0.013	0.013	NA	NA	NA	March-December 1988	01/03/1988	NA	W	Cocchieri et al., 1990	1990	1988	1	NA	NA	NA	NA	1.18839E-05	0.014849315	NA	4.1
203	IT	Gulf of Naples	37.1.3	Tyrrhenian	40.69191	14.17448	2	Actinopterygii	Perciformes	Carangidae	Trachurus trachurus	Atlantic horse mackerel	Tratra	oceanic mesopelagic	4.18	FB	NA	NA	44	NA	NA	NA	Fl	LMW	Petrogenic	WW	NA	NA	<LOD	NA	NA	NA	NA	March-December 1988	01/03/1988	NA	W	Cocchieri et al., 1990	1990	1988	1	NA	NA	NA	NA	NA	0.014849315	0.04	NA
204	IT	Gulf of Naples	37.1.3	Tyrrhenian	40.69191	14.17448	2	Actinopterygii	Perciformes	Carangidae	Trachurus trachurus	Atlantic horse mackerel	Tratra	oceanic mesopelagic	4.18	FB	NA	NA	44	NA	NA	NA	Flu	MMW	Pyrolitic	WW	NA	NA	0.006	0.006	NA	NA	NA	March-December 1988	01/03/1988	NA	W	Cocchieri et al., 1990	1990	1988	1	3.34444E-05	3.34444E-05	NA	NA	NA	0.014849315	0.04	NA
205	IT	Gulf of Naples	37.1.3	Tyrrhenian	40.69191	14.17448	2	Actinopterygii	Perciformes	Carangidae	Trachurus trachurus	Atlantic horse mackerel	Tratra	oceanic mesopelagic	4.18	FB	NA	NA	44	NA	NA	NA	InP	HMW	Pyrolitic	WW	NA	NA	<LOD	NA	NA	NA	NA	March-December 1988	01/03/1988	NA	W	Cocchieri et al., 1990	1990	1988	1	NA	NA	NA	NA	NA	0.014849315	NA	1.2
206	IT	Gulf of Naples	37.1.3	Tyrrhenian	40.69191	14.17448	2	Actinopterygii	Perciformes	Carangidae	Trachurus trachurus	Atlantic horse mackerel	Tratra	oceanic mesopelagic	4.18	FB	NA	NA	44	NA	NA	NA	Nap	LMW	Petrogenic	WW	NA	NA	<LOD	NA	NA	NA	NA	March-December 1988	01/03/1988	NA	W	Cocchieri et al., 1990	1990	1988	1	NA	NA	NA	NA	NA	0.014849315	0.02	0.441455329
207	IT	Gulf of Naples	37.1.3	Tyrrhenian	40.69191	14.17448	2	Actinopterygii	Perciformes	Carangidae	Trachurus trachurus	Atlantic horse mackerel	Tratra	oceanic mesopelagic	4.18	FB	NA	NA	44	NA	NA	NA	Phe	LMW	Petrogenic	WW	NA	NA	<LOD	NA	NA	NA	NA	March-December 1988	01/03/1988	NA	W	Cocchieri et al., 1990	1990	1988	1	NA	NA	NA	NA	NA	0.014849315	NA	NA
208	IT	Gulf of Naples	37.1.3	Tyrrhenian	40.69191	14.17448	2	Actinopterygii	Perciformes	Carangidae	Trachurus trachurus	Atlantic horse mackerel	Tratra	oceanic mesopelagic	4.18	FB	NA	NA	44	NA	NA	NA	Pyr	MMW	Pyrolitic	WW	NA	NA	0.01	0.01	NA	NA	NA	March-December 1988	01/03/1988	NA	W	Cocchieri et al., 1990	1990	1988	1	7.43209E-05	7.43209E-05	NA	NA	NA	0.014849315	0.03	NA
209	IT	Gulf of Naples	37.1.3	Tyrrhenian	40.69191	14.17448	2	Actinopterygii	Perciformes	Labridae	Xyrichtys novacula	Pearly razorfish	Xyrnov	neritic epipelagic reef-associated	2.9	REF	NA	NA	77	NA	NA	NA	Ace	LMW	Petrogenic	WW	NA	NA	<LOD	NA	NA	NA	NA	March-December 1988	01/03/1988	NA	W	Cocchieri et al., 1990	1990	1988	1	NA	NA	NA	NA	NA	0.014849315	0.06	NA
210	IT	Gulf of Naples	37.1.3	Tyrrhenian	40.69191	14.17448	2	Actinopterygii	Perciformes	Labridae	Xyrichtys novacula	Pearly razorfish	Xyrnov	neritic epipelagic reef-associated	2.9	REF	NA	NA	77	NA	NA	NA	Acy	LMW	Petrogenic	WW	NA	0.02	<LOD	0.01	NA	NA	NA	March-December 1988	01/03/1988	NA	W	Cocchieri et al., 1990	1990	1988	1	NA	NA	NA	NA	NA	0.014849315	NA	NA
211	IT	Gulf of Naples	37.1.3	Tyrrhenian	40.69191	14.17448	2	Actinopterygii	Perciformes	Labridae	Xyrichtys novacula	Pearly razorfish	Xyrnov	neritic epipelagic reef-associated	2.9	REF	NA	NA	77	NA	NA	NA	Ant	LMW	Petrogenic	WW	NA	0.001	0.014	0.014	NA	NA	NA	March-December 1988	01/03/1988	NA	W	Cocchieri et al., 1990	1990	1988	1	1.04049E-05	1.04049E-05	NA	NA	NA	0.014849315	0.3	NA
212	IT	Gulf of Naples	37.1.3	Tyrrhenian	40.69191	14.17448	2	Actinopterygii	Perciformes	Labridae	Xyrichtys novacula	Pearly razorfish	Xyrnov	neritic epipelagic reef-associated	2.9	REF	NA	NA	77	NA	NA	NA	BaA	HMW	Pyrolitic	WW	NA	NA	0.007	0.007	NA	NA	NA	March-December 1988	01/03/1988	NA	W	Cocchieri et al., 1990	1990	1988	1	NA	NA	NA	NA	1.87289E-06	0.014849315	NA	1.2
213	IT	Gulf of Naples	37.1.3	Tyrrhenian	40.69191	14.17448	2	Actinopterygii	Perciformes	Labridae	Xyrichtys novacula	Pearly razorfish	Xyrnov	neritic epipelagic reef-associated	2.9	REF	NA	NA	77	NA	NA	NA	BaP	HMW	Pyrolitic	WW	NA	NA	0.044	0.044	NA	NA	NA	March-December 1988	01/03/1988	NA	W	Cocchieri et al., 1990	1990	1988	1	0.032701194	0.032701194	NA	NA	2.845E-05	0.014849315	0.0003	2.9
214	IT	Gulf of Naples	37.1.3	Tyrrhenian	40.69191	14.17448	2	Actinopterygii	Perciformes	Labridae	Xyrichtys novacula	Pearly razorfish	Xyrnov	neritic epipelagic reef-associated	2.9	REF	NA	NA	77	NA	NA	NA	BbF	HMW	Pyrolitic	WW	NA	NA	0.005	0.005	NA	NA	NA	March-December 1988	01/03/1988	NA	W	Cocchieri et al., 1990	1990	1988	1	NA	NA	NA	NA	1.33778E-06	0.014849315	NA	1.2
215	IT	Gulf of Naples	37.1.3	Tyrrhenian	40.69191	14.17448	2	Actinopterygii	Perciformes	Labridae	Xyrichtys novacula	Pearly razorfish	Xyrnov	neritic epipelagic reef-associated	2.9	REF	NA	NA	77	NA	NA	NA	BghiP	HMW	Pyrolitic	WW	NA	NA	0.012	0.012	NA	NA	NA	March-December 1988	01/03/1988	NA	W	Cocchieri et al., 1990	1990	1988	1	NA	NA	NA	NA	NA	0.014849315	NA	NA
216	IT	Gulf of Naples	37.1.3	Tyrrhenian	40.69191	14.17448	2	Actinopterygii	Perciformes	Labridae	Xyrichtys novacula	Pearly razorfish	Xyrnov	neritic epipelagic reef-associated	2.9	REF	NA	NA	77	NA	NA	NA	BkF	HMW	Pyrolitic	WW	NA	NA	0.008	0.008	NA	NA	NA	March-December 1988	01/03/1988	NA	W	Cocchieri et al., 1990	1990	1988	1	NA	NA	NA	NA	2.14044E-06	0.014849315	NA	1.2
217	IT	Gulf of Naples	37.1.3	Tyrrhenian	40.69191	14.17448	2	Actinopterygii	Perciformes	Labridae	Xyrichtys novacula	Pearly razorfish	Xyrnov	neritic epipelagic reef-associated	2.9	REF	NA	NA	77	NA	NA	NA	Chr	HMW	Pyrolitic	WW	NA	NA	0.012	0.012	NA	NA	NA	March-December 1988	01/03/1988	NA	W	Cocchieri et al., 1990	1990	1988	1	NA	NA	NA	NA	1.18114E-06	0.014849315	NA	0.441455329
218	IT	Gulf of Naples	37.1.3	Tyrrhenian	40.69191	14.17448	2	Actinopterygii	Perciformes	Labridae	Xyrichtys novacula	Pearly razorfish	Xyrnov	neritic epipelagic reef-associated	2.9	REF	NA	NA	77	NA	NA	NA	DahA	HMW	Pyrolitic	WW	NA	NA	0.027	0.027	NA	NA	NA	March-December 1988	01/03/1988	NA	W	Cocchieri et al., 1990	1990	1988	1	NA	NA	NA	NA	2.4682E-05	0.014849315	NA	4.1
219	IT	Gulf of Naples	37.1.3	Tyrrhenian	40.69191	14.17448	2	Actinopterygii	Perciformes	Labridae	Xyrichtys novacula	Pearly razorfish	Xyrnov	neritic epipelagic reef-associated	2.9	REF	NA	NA	77	NA	NA	NA	Fl	LMW	Petrogenic	WW	NA	NA	<LOD	NA	NA	NA	NA	March-December 1988	01/03/1988	NA	W	Cocchieri et al., 1990	1990	1988	1	NA	NA	NA	NA	NA	0.014849315	0.04	NA
220	IT	Gulf of Naples	37.1.3	Tyrrhenian	40.69191	14.17448	2	Actinopterygii	Perciformes	Labridae	Xyrichtys novacula	Pearly razorfish	Xyrnov	neritic epipelagic reef-associated	2.9	REF	NA	NA	77	NA	NA	NA	Flu	MMW	Pyrolitic	WW	NA	NA	0.029	0.029	NA	NA	NA	March-December 1988	01/03/1988	NA	W	Cocchieri et al., 1990	1990	1988	1	0.000161648	0.000161648	NA	NA	NA	0.014849315	0.04	NA
221	IT	Gulf of Naples	37.1.3	Tyrrhenian	40.69191	14.17448	2	Actinopterygii	Perciformes	Labridae	Xyrichtys novacula	Pearly razorfish	Xyrnov	neritic epipelagic reef-associated	2.9	REF	NA	NA	77	NA	NA	NA	InP	HMW	Pyrolitic	WW	NA	NA	<LOD	NA	NA	NA	NA	March-December 1988	01/03/1988	NA	W	Cocchieri et al., 1990	1990	1988	1	NA	NA	NA	NA	NA	0.014849315	NA	1.2
222	IT	Gulf of Naples	37.1.3	Tyrrhenian	40.69191	14.17448	2	Actinopterygii	Perciformes	Labridae	Xyrichtys novacula	Pearly razorfish	Xyrnov	neritic epipelagic reef-associated	2.9	REF	NA	NA	77	NA	NA	NA	Nap	LMW	Petrogenic	WW	NA	NA	<LOD	NA	NA	NA	NA	March-December 1988	01/03/1988	NA	W	Cocchieri et al., 1990	1990	1988	1	NA	NA	NA	NA	NA	0.014849315	0.02	0.441455329
223	IT	Gulf of Naples	37.1.3	Tyrrhenian	40.69191	14.17448	2	Actinopterygii	Perciformes	Labridae	Xyrichtys novacula	Pearly razorfish	Xyrnov	neritic epipelagic reef-associated	2.9	REF	NA	NA	77	NA	NA	NA	Phe	LMW	Petrogenic	WW	NA	NA	0.006	0.006	NA	NA	NA	March-December 1988	01/03/1988	NA	W	Cocchieri et al., 1990	1990	1988	1	NA	NA	NA	NA	NA	0.014849315	NA	NA
224	IT	Gulf of Naples	37.1.3	Tyrrhenian	40.69191	14.17448	2	Actinopterygii	Perciformes	Labridae	Xyrichtys novacula	Pearly razorfish	Xyrnov	neritic epipelagic reef-associated	2.9	REF	NA	NA	77	NA	NA	NA	Pyr	MMW	Pyrolitic	WW	NA	NA	<LOD	NA	NA	NA	NA	March-December 1988	01/03/1988	NA	W	Cocchieri et al., 1990	1990	1988	1	NA	NA	NA	NA	NA	0.014849315	0.03	NA
225	IT	Gulf of Naples	37.1.3	Tyrrhenian	40.69191	14.17448	2	Elasmobranchii	Torpediniformes	Torpedinidae	Trachinus araneus	Spotted weever	Traara	neritic epipelagic demersal	4.00	FB	NA	NA	8	NA	NA	NA	Ace	LMW	Petrogenic	WW	NA	NA	<LOD	NA	NA	NA	NA	March-December 1988	01/03/1988	NA	W	Cocchieri et al., 1990	1990	1988	1	NA	NA	NA	NA	NA	0.020794521	0.06	NA
226	IT	Gulf of Naples	37.1.3	Tyrrhenian	40.69191	14.17448	2	Elasmobranchii	Torpediniformes	Torpedinidae	Trachinus araneus	Spotted weever	Traara	neritic epipelagic demersal	4.00	FB	NA	NA	8	NA	NA	NA	Acy	LMW	Petrogenic	WW	NA	0.02	<LOD	0.01	NA	NA	NA	March-December 1988	01/03/1988	NA	W	Cocchieri et al., 1990	1990	1988	1	NA	NA	NA	NA	NA	0.020794521	NA	NA
227	IT	Gulf of Naples	37.1.3	Tyrrhenian	40.69191	14.17448	2	Elasmobranchii	Torpediniformes	Torpedinidae	Trachinus araneus	Spotted weever	Traara	neritic epipelagic demersal	4.00	FB	NA	NA	8	NA	NA	NA	Ant	LMW	Petrogenic	WW	NA	0.001	0.004	0.004	NA	NA	NA	March-December 1988	01/03/1988	NA	W	Cocchieri et al., 1990	1990	1988	1	4.16307E-06	4.16307E-06	NA	NA	NA	0.020794521	0.3	NA
228	IT	Gulf of Naples	37.1.3	Tyrrhenian	40.69191	14.17448	2	Elasmobranchii	Torpediniformes	Torpedinidae	Trachinus araneus	Spotted weever	Traara	neritic epipelagic demersal	4.00	FB	NA	NA	8	NA	NA	NA	BaA	HMW	Pyrolitic	WW	NA	NA	0.005	0.005	NA	NA	NA	March-December 1988	01/03/1988	NA	W	Cocchieri et al., 1990	1990	1988	1	NA	NA	NA	NA	1.87338E-06	0.020794521	NA	1.2
229	IT	Gulf of Naples	37.1.3	Tyrrhenian	40.69191	14.17448	2	Elasmobranchii	Torpediniformes	Torpedinidae	Trachinus araneus	Spotted weever	Traara	neritic epipelagic demersal	4.00	FB	NA	NA	8	NA	NA	NA	BaP	HMW	Pyrolitic	WW	NA	NA	0.021	0.021	NA	NA	NA	March-December 1988	01/03/1988	NA	W	Cocchieri et al., 1990	1990	1988	1	0.021856103	0.021856103	NA	NA	1.90148E-05	0.020794521	0.0003	2.9
230	IT	Gulf of Naples	37.1.3	Tyrrhenian	40.69191	14.17448	2	Elasmobranchii	Torpediniformes	Torpedinidae	Trachinus araneus	Spotted weever	Traara	neritic epipelagic demersal	4.00	FB	NA	NA	8	NA	NA	NA	BbF	HMW	Pyrolitic	WW	NA	NA	0.028	0.028	NA	NA	NA	March-December 1988	01/03/1988	NA	W	Cocchieri et al., 1990	1990	1988	1	NA	NA	NA	NA	1.04909E-05	0.020794521	NA	1.2
231	IT	Gulf of Naples	37.1.3	Tyrrhenian	40.69191	14.17448	2	Elasmobranchii	Torpediniformes	Torpedinidae	Trachinus araneus	Spotted weever	Traara	neritic epipelagic demersal	4.00	FB	NA	NA	8	NA	NA	NA	BghiP	HMW	Pyrolitic	WW	NA	NA	0.109	0.109	NA	NA	NA	March-December 1988	01/03/1988	NA	W	Cocchieri et al., 1990	1990	1988	1	NA	NA	NA	NA	NA	0.020794521	NA	NA
232	IT	Gulf of Naples	37.1.3	Tyrrhenian	40.69191	14.17448	2	Elasmobranchii	Torpediniformes	Torpedinidae	Trachinus araneus	Spotted weever	Traara	neritic epipelagic demersal	4.00	FB	NA	NA	8	NA	NA	NA	BkF	HMW	Pyrolitic	WW	NA	NA	<LOD	NA	NA	NA	NA	March-December 1988	01/03/1988	NA	W	Cocchieri et al., 1990	1990	1988	1	NA	NA	NA	NA	NA	0.020794521	NA	1.2
233	IT	Gulf of Naples	37.1.3	Tyrrhenian	40.69191	14.17448	2	Elasmobranchii	Torpediniformes	Torpedinidae	Trachinus araneus	Spotted weever	Traara	neritic epipelagic demersal	4.00	FB	NA	NA	8	NA	NA	NA	Chr	HMW	Pyrolitic	WW	NA	NA	<LOD	NA	NA	NA	NA	March-December 1988	01/03/1988	NA	W	Cocchieri et al., 1990	1990	1988	1	NA	NA	NA	NA	NA	0.020794521	NA	0.441455329
234	IT	Gulf of Naples	37.1.3	Tyrrhenian	40.69191	14.17448	2	Elasmobranchii	Torpediniformes	Torpedinidae	Trachinus araneus	Spotted weever	Traara	neritic epipelagic demersal	4.00	FB	NA	NA	8	NA	NA	NA	DahA	HMW	Pyrolitic	WW	NA	NA	0.024	0.024	NA	NA	NA	March-December 1988	01/03/1988	NA	W	Cocchieri et al., 1990	1990	1988	1	NA	NA	NA	NA	3.07234E-05	0.020794521	NA	4.1
235	IT	Gulf of Naples	37.1.3	Tyrrhenian	40.69191	14.17448	2	Elasmobranchii	Torpediniformes	Torpedinidae	Trachinus araneus	Spotted weever	Traara	neritic epipelagic demersal	4.00	FB	NA	NA	8	NA	NA	NA	Fl	LMW	Petrogenic	WW	NA	NA	<LOD	NA	NA	NA	NA	March-December 1988	01/03/1988	NA	W	Cocchieri et al., 1990	1990	1988	1	NA	NA	NA	NA	NA	0.020794521	0.04	NA
236	IT	Gulf of Naples	37.1.3	Tyrrhenian	40.69191	14.17448	2	Elasmobranchii	Torpediniformes	Torpedinidae	Trachinus araneus	Spotted weever	Traara	neritic epipelagic demersal	4.00	FB	NA	NA	8	NA	NA	NA	Flu	MMW	Pyrolitic	WW	NA	NA	0.006	0.006	NA	NA	NA	March-December 1988	01/03/1988	NA	W	Cocchieri et al., 1990	1990	1988	1	4.68345E-05	4.68345E-05	NA	NA	NA	0.020794521	0.04	NA
237	IT	Gulf of Naples	37.1.3	Tyrrhenian	40.69191	14.17448	2	Elasmobranchii	Torpediniformes	Torpedinidae	Trachinus araneus	Spotted weever	Traara	neritic epipelagic demersal	4.00	FB	NA	NA	8	NA	NA	NA	InP	HMW	Pyrolitic	WW	NA	NA	<LOD	NA	NA	NA	NA	March-December 1988	01/03/1988	NA	W	Cocchieri et al., 1990	1990	1988	1	NA	NA	NA	NA	NA	0.020794521	NA	1.2
238	IT	Gulf of Naples	37.1.3	Tyrrhenian	40.69191	14.17448	2	Elasmobranchii	Torpediniformes	Torpedinidae	Trachinus araneus	Spotted weever	Traara	neritic epipelagic demersal	4.00	FB	NA	NA	8	NA	NA	NA	Nap	LMW	Petrogenic	WW	NA	NA	<LOD	NA	NA	NA	NA	March-December 1988	01/03/1988	NA	W	Cocchieri et al., 1990	1990	1988	1	NA	NA	NA	NA	NA	0.020794521	0.02	0.441455329
239	IT	Gulf of Naples	37.1.3	Tyrrhenian	40.69191	14.17448	2	Elasmobranchii	Torpediniformes	Torpedinidae	Trachinus araneus	Spotted weever	Traara	neritic epipelagic demersal	4.00	FB	NA	NA	8	NA	NA	NA	Phe	LMW	Petrogenic	WW	NA	NA	0.005	0.005	NA	NA	NA	March-December 1988	01/03/1988	NA	W	Cocchieri et al., 1990	1990	1988	1	NA	NA	NA	NA	NA	0.020794521	NA	NA
240	IT	Gulf of Naples	37.1.3	Tyrrhenian	40.69191	14.17448	2	Elasmobranchii	Torpediniformes	Torpedinidae	Trachinus araneus	Spotted weever	Traara	neritic epipelagic demersal	4.00	FB	NA	NA	8	NA	NA	NA	Pyr	MMW	Pyrolitic	WW	NA	NA	0.017	0.017	NA	NA	NA	March-December 1988	01/03/1988	NA	W	Cocchieri et al., 1990	1990	1988	1	0.00017693	0.00017693	NA	NA	NA	0.020794521	0.03	NA
241	IT	Gulf of Naples	37.1.3	Tyrrhenian	40.69191	14.17448	2	Actinopterygii	Perciformes	Sparidae	Boops boops	Bogue	Booboo	neritic epipelagic demersal	3.11	FB	NA	NA	40	NA	NA	NA	Ace	LMW	Petrogenic	WW	NA	NA	<LOD	NA	NA	NA	NA	March-December 1988	01/03/1988	NA	W	Cocchieri et al., 1990	1990	1988	1	NA	NA	NA	NA	NA	0.021287671	0.06	NA
242	IT	Gulf of Naples	37.1.3	Tyrrhenian	40.69191	14.17448	2	Actinopterygii	Perciformes	Sparidae	Boops boops	Bogue	Booboo	neritic epipelagic demersal	3.11	FB	NA	NA	40	NA	NA	NA	Acy	LMW	Petrogenic	WW	NA	0.02	<LOD	0.01	NA	NA	NA	March-December 1988	01/03/1988	NA	W	Cocchieri et al., 1990	1990	1988	1	NA	NA	NA	NA	NA	0.021287671	NA	NA
243	IT	Gulf of Naples	37.1.3	Tyrrhenian	40.69191	14.17448	2	Actinopterygii	Perciformes	Sparidae	Boops boops	Bogue	Booboo	neritic epipelagic demersal	3.11	FB	NA	NA	40	NA	NA	NA	Ant	LMW	Petrogenic	WW	NA	0.001	<LOD	0.0005	NA	NA	NA	March-December 1988	01/03/1988	NA	W	Cocchieri et al., 1990	1990	1988	1	NA	5.32725E-07	NA	NA	NA	0.021287671	0.3	NA
244	IT	Gulf of Naples	37.1.3	Tyrrhenian	40.69191	14.17448	2	Actinopterygii	Perciformes	Sparidae	Boops boops	Bogue	Booboo	neritic epipelagic demersal	3.11	FB	NA	NA	40	NA	NA	NA	BaA	HMW	Pyrolitic	WW	NA	NA	<LOD	NA	NA	NA	NA	March-December 1988	01/03/1988	NA	W	Cocchieri et al., 1990	1990	1988	1	NA	NA	NA	NA	NA	0.021287671	NA	1.2
245	IT	Gulf of Naples	37.1.3	Tyrrhenian	40.69191	14.17448	2	Actinopterygii	Perciformes	Sparidae	Boops boops	Bogue	Booboo	neritic epipelagic demersal	3.11	FB	NA	NA	40	NA	NA	NA	BaP	HMW	Pyrolitic	WW	NA	NA	0.012	0.012	NA	NA	NA	March-December 1988	01/03/1988	NA	W	Cocchieri et al., 1990	1990	1988	1	0.012785388	0.012785388	NA	NA	1.11233E-05	0.021287671	0.0003	2.9
246	IT	Gulf of Naples	37.1.3	Tyrrhenian	40.69191	14.17448	2	Actinopterygii	Perciformes	Sparidae	Boops boops	Bogue	Booboo	neritic epipelagic demersal	3.11	FB	NA	NA	40	NA	NA	NA	BbF	HMW	Pyrolitic	WW	NA	NA	0.007	0.007	NA	NA	NA	March-December 1988	01/03/1988	NA	W	Cocchieri et al., 1990	1990	1988	1	NA	NA	NA	NA	2.68493E-06	0.021287671	NA	1.2
247	IT	Gulf of Naples	37.1.3	Tyrrhenian	40.69191	14.17448	2	Actinopterygii	Perciformes	Sparidae	Boops boops	Bogue	Booboo	neritic epipelagic demersal	3.11	FB	NA	NA	40	NA	NA	NA	BghiP	HMW	Pyrolitic	WW	NA	NA	1.262	1.262	NA	NA	NA	March-December 1988	01/03/1988	NA	W	Cocchieri et al., 1990	1990	1988	1	NA	NA	NA	NA	NA	0.021287671	NA	NA
248	IT	Gulf of Naples	37.1.3	Tyrrhenian	40.69191	14.17448	2	Actinopterygii	Perciformes	Sparidae	Boops boops	Bogue	Booboo	neritic epipelagic demersal	3.11	FB	NA	NA	40	NA	NA	NA	BkF	HMW	Pyrolitic	WW	NA	NA	<LOD	NA	NA	NA	NA	March-December 1988	01/03/1988	NA	W	Cocchieri et al., 1990	1990	1988	1	NA	NA	NA	NA	NA	0.021287671	NA	1.2
249	IT	Gulf of Naples	37.1.3	Tyrrhenian	40.69191	14.17448	2	Actinopterygii	Perciformes	Sparidae	Boops boops	Bogue	Booboo	neritic epipelagic demersal	3.11	FB	NA	NA	40	NA	NA	NA	Chr	HMW	Pyrolitic	WW	NA	NA	<LOD	NA	NA	NA	NA	March-December 1988	01/03/1988	NA	W	Cocchieri et al., 1990	1990	1988	1	NA	NA	NA	NA	NA	0.021287671	NA	0.441455329
250	IT	Gulf of Naples	37.1.3	Tyrrhenian	40.69191	14.17448	2	Actinopterygii	Perciformes	Sparidae	Boops boops	Bogue	Booboo	neritic epipelagic demersal	3.11	FB	NA	NA	40	NA	NA	NA	DahA	HMW	Pyrolitic	WW	NA	NA	<LOD	NA	NA	NA	NA	March-December 1988	01/03/1988	NA	W	Cocchieri et al., 1990	1990	1988	1	NA	NA	NA	NA	NA	0.021287671	NA	4.1
251	IT	Gulf of Naples	37.1.3	Tyrrhenian	40.69191	14.17448	2	Actinopterygii	Perciformes	Sparidae	Boops boops	Bogue	Booboo	neritic epipelagic demersal	3.11	FB	NA	NA	40	NA	NA	NA	Fl	LMW	Petrogenic	WW	NA	NA	<LOD	NA	NA	NA	NA	March-December 1988	01/03/1988	NA	W	Cocchieri et al., 1990	1990	1988	1	NA	NA	NA	NA	NA	0.021287671	0.04	NA
252	IT	Gulf of Naples	37.1.3	Tyrrhenian	40.69191	14.17448	2	Actinopterygii	Perciformes	Sparidae	Boops boops	Bogue	Booboo	neritic epipelagic demersal	3.11	FB	NA	NA	40	NA	NA	NA	Flu	MMW	Pyrolitic	WW	NA	NA	<LOD	NA	NA	NA	NA	March-December 1988	01/03/1988	NA	W	Cocchieri et al., 1990	1990	1988	1	NA	NA	NA	NA	NA	0.021287671	0.04	NA
253	IT	Gulf of Naples	37.1.3	Tyrrhenian	40.69191	14.17448	2	Actinopterygii	Perciformes	Sparidae	Boops boops	Bogue	Booboo	neritic epipelagic demersal	3.11	FB	NA	NA	40	NA	NA	NA	InP	HMW	Pyrolitic	WW	NA	NA	<LOD	NA	NA	NA	NA	March-December 1988	01/03/1988	NA	W	Cocchieri et al., 1990	1990	1988	1	NA	NA	NA	NA	NA	0.021287671	NA	1.2
254	IT	Gulf of Naples	37.1.3	Tyrrhenian	40.69191	14.17448	2	Actinopterygii	Perciformes	Sparidae	Boops boops	Bogue	Booboo	neritic epipelagic demersal	3.11	FB	NA	NA	40	NA	NA	NA	Nap	LMW	Petrogenic	WW	NA	NA	<LOD	NA	NA	NA	NA	March-December 1988	01/03/1988	NA	W	Cocchieri et al., 1990	1990	1988	1	NA	NA	NA	NA	NA	0.021287671	0.02	0.441455329
255	IT	Gulf of Naples	37.1.3	Tyrrhenian	40.69191	14.17448	2	Actinopterygii	Perciformes	Sparidae	Boops boops	Bogue	Booboo	neritic epipelagic demersal	3.11	FB	NA	NA	40	NA	NA	NA	Phe	LMW	Petrogenic	WW	NA	NA	<LOD	NA	NA	NA	NA	March-December 1988	01/03/1988	NA	W	Cocchieri et al., 1990	1990	1988	1	NA	NA	NA	NA	NA	0.021287671	NA	NA
256	IT	Gulf of Naples	37.1.3	Tyrrhenian	40.69191	14.17448	2	Actinopterygii	Perciformes	Sparidae	Boops boops	Bogue	Booboo	neritic epipelagic demersal	3.11	FB	NA	NA	40	NA	NA	NA	Pyr	MMW	Pyrolitic	WW	NA	NA	<LOD	NA	NA	NA	NA	March-December 1988	01/03/1988	NA	W	Cocchieri et al., 1990	1990	1988	1	NA	NA	NA	NA	NA	0.021287671	0.03	NA
257	IT	Gulf of Naples	37.1.3	Tyrrhenian	40.69191	14.17448	2	Actinopterygii	Pleuronectiformes	Scophthalmidae	Scophthalmus rhombus	Brill	Scorho	neritic epipelagic demersal	4.22	FB	NA	NA	36	NA	NA	NA	Ace	LMW	Petrogenic	WW	NA	NA	<LOD	NA	NA	NA	NA	March-December 1988	01/03/1988	NA	W	Cocchieri et al., 1990	1990	1988	1	NA	NA	NA	NA	NA	0.021287671	0.06	NA
258	IT	Gulf of Naples	37.1.3	Tyrrhenian	40.69191	14.17448	2	Actinopterygii	Pleuronectiformes	Scophthalmidae	Scophthalmus rhombus	Brill	Scorho	neritic epipelagic demersal	4.22	FB	NA	NA	36	NA	NA	NA	Acy	LMW	Petrogenic	WW	NA	0.02	<LOD	0.01	NA	NA	NA	March-December 1988	01/03/1988	NA	W	Cocchieri et al., 1990	1990	1988	1	NA	NA	NA	NA	NA	0.021287671	NA	NA
259	IT	Gulf of Naples	37.1.3	Tyrrhenian	40.69191	14.17448	2	Actinopterygii	Pleuronectiformes	Scophthalmidae	Scophthalmus rhombus	Brill	Scorho	neritic epipelagic demersal	4.22	FB	NA	NA	36	NA	NA	NA	Ant	LMW	Petrogenic	WW	NA	0.001	0.003	0.003	NA	NA	NA	March-December 1988	01/03/1988	NA	W	Cocchieri et al., 1990	1990	1988	1	3.19635E-06	3.19635E-06	NA	NA	NA	0.021287671	0.3	NA
260	IT	Gulf of Naples	37.1.3	Tyrrhenian	40.69191	14.17448	2	Actinopterygii	Pleuronectiformes	Scophthalmidae	Scophthalmus rhombus	Brill	Scorho	neritic epipelagic demersal	4.22	FB	NA	NA	36	NA	NA	NA	BaA	HMW	Pyrolitic	WW	NA	NA	<LOD	NA	NA	NA	NA	March-December 1988	01/03/1988	NA	W	Cocchieri et al., 1990	1990	1988	1	NA	NA	NA	NA	NA	0.021287671	NA	1.2
261	IT	Gulf of Naples	37.1.3	Tyrrhenian	40.69191	14.17448	2	Actinopterygii	Pleuronectiformes	Scophthalmidae	Scophthalmus rhombus	Brill	Scorho	neritic epipelagic demersal	4.22	FB	NA	NA	36	NA	NA	NA	BaP	HMW	Pyrolitic	WW	NA	NA	0.008	0.008	NA	NA	NA	March-December 1988	01/03/1988	NA	W	Cocchieri et al., 1990	1990	1988	1	0.008523592	0.008523592	NA	NA	7.41553E-06	0.021287671	0.0003	2.9
262	IT	Gulf of Naples	37.1.3	Tyrrhenian	40.69191	14.17448	2	Actinopterygii	Pleuronectiformes	Scophthalmidae	Scophthalmus rhombus	Brill	Scorho	neritic epipelagic demersal	4.22	FB	NA	NA	36	NA	NA	NA	BbF	HMW	Pyrolitic	WW	NA	NA	<LOD	NA	NA	NA	NA	March-December 1988	01/03/1988	NA	W	Cocchieri et al., 1990	1990	1988	1	NA	NA	NA	NA	NA	0.021287671	NA	1.2
263	IT	Gulf of Naples	37.1.3	Tyrrhenian	40.69191	14.17448	2	Actinopterygii	Pleuronectiformes	Scophthalmidae	Scophthalmus rhombus	Brill	Scorho	neritic epipelagic demersal	4.22	FB	NA	NA	36	NA	NA	NA	BghiP	HMW	Pyrolitic	WW	NA	NA	<LOD	NA	NA	NA	NA	March-December 1988	01/03/1988	NA	W	Cocchieri et al., 1990	1990	1988	1	NA	NA	NA	NA	NA	0.021287671	NA	NA
264	IT	Gulf of Naples	37.1.3	Tyrrhenian	40.69191	14.17448	2	Actinopterygii	Pleuronectiformes	Scophthalmidae	Scophthalmus rhombus	Brill	Scorho	neritic epipelagic demersal	4.22	FB	NA	NA	36	NA	NA	NA	BkF	HMW	Pyrolitic	WW	NA	NA	0.024	0.024	NA	NA	NA	March-December 1988	01/03/1988	NA	W	Cocchieri et al., 1990	1990	1988	1	NA	NA	NA	NA	9.20548E-06	0.021287671	NA	1.2
265	IT	Gulf of Naples	37.1.3	Tyrrhenian	40.69191	14.17448	2	Actinopterygii	Pleuronectiformes	Scophthalmidae	Scophthalmus rhombus	Brill	Scorho	neritic epipelagic demersal	4.22	FB	NA	NA	36	NA	NA	NA	Chr	HMW	Pyrolitic	WW	NA	NA	0.032	0.032	NA	NA	NA	March-December 1988	01/03/1988	NA	W	Cocchieri et al., 1990	1990	1988	1	NA	NA	NA	NA	4.51534E-06	0.021287671	NA	0.441455329
266	IT	Gulf of Naples	37.1.3	Tyrrhenian	40.69191	14.17448	2	Actinopterygii	Pleuronectiformes	Scophthalmidae	Scophthalmus rhombus	Brill	Scorho	neritic epipelagic demersal	4.22	FB	NA	NA	36	NA	NA	NA	DahA	HMW	Pyrolitic	WW	NA	NA	0.034	0.034	NA	NA	NA	March-December 1988	01/03/1988	NA	W	Cocchieri et al., 1990	1990	1988	1	NA	NA	NA	NA	4.45571E-05	0.021287671	NA	4.1
267	IT	Gulf of Naples	37.1.3	Tyrrhenian	40.69191	14.17448	2	Actinopterygii	Pleuronectiformes	Scophthalmidae	Scophthalmus rhombus	Brill	Scorho	neritic epipelagic demersal	4.22	FB	NA	NA	36	NA	NA	NA	Fl	LMW	Petrogenic	WW	NA	NA	<LOD	NA	NA	NA	NA	March-December 1988	01/03/1988	NA	W	Cocchieri et al., 1990	1990	1988	1	NA	NA	NA	NA	NA	0.021287671	0.04	NA
268	IT	Gulf of Naples	37.1.3	Tyrrhenian	40.69191	14.17448	2	Actinopterygii	Pleuronectiformes	Scophthalmidae	Scophthalmus rhombus	Brill	Scorho	neritic epipelagic demersal	4.22	FB	NA	NA	36	NA	NA	NA	Flu	MMW	Pyrolitic	WW	NA	NA	0.003	0.003	NA	NA	NA	March-December 1988	01/03/1988	NA	W	Cocchieri et al., 1990	1990	1988	1	2.39726E-05	2.39726E-05	NA	NA	NA	0.021287671	0.04	NA
269	IT	Gulf of Naples	37.1.3	Tyrrhenian	40.69191	14.17448	2	Actinopterygii	Pleuronectiformes	Scophthalmidae	Scophthalmus rhombus	Brill	Scorho	neritic epipelagic demersal	4.22	FB	NA	NA	36	NA	NA	NA	InP	HMW	Pyrolitic	WW	NA	NA	<LOD	NA	NA	NA	NA	March-December 1988	01/03/1988	NA	W	Cocchieri et al., 1990	1990	1988	1	NA	NA	NA	NA	NA	0.021287671	NA	1.2
270	IT	Gulf of Naples	37.1.3	Tyrrhenian	40.69191	14.17448	2	Actinopterygii	Pleuronectiformes	Scophthalmidae	Scophthalmus rhombus	Brill	Scorho	neritic epipelagic demersal	4.22	FB	NA	NA	36	NA	NA	NA	Nap	LMW	Petrogenic	WW	NA	NA	<LOD	NA	NA	NA	NA	March-December 1988	01/03/1988	NA	W	Cocchieri et al., 1990	1990	1988	1	NA	NA	NA	NA	NA	0.021287671	0.02	0.441455329
271	IT	Gulf of Naples	37.1.3	Tyrrhenian	40.69191	14.17448	2	Actinopterygii	Pleuronectiformes	Scophthalmidae	Scophthalmus rhombus	Brill	Scorho	neritic epipelagic demersal	4.22	FB	NA	NA	36	NA	NA	NA	Phe	LMW	Petrogenic	WW	NA	NA	0.005	0.005	NA	NA	NA	March-December 1988	01/03/1988	NA	W	Cocchieri et al., 1990	1990	1988	1	NA	NA	NA	NA	NA	0.021287671	NA	NA
272	IT	Gulf of Naples	37.1.3	Tyrrhenian	40.69191	14.17448	2	Actinopterygii	Pleuronectiformes	Scophthalmidae	Scophthalmus rhombus	Brill	Scorho	neritic epipelagic demersal	4.22	FB	NA	NA	36	NA	NA	NA	Pyr	MMW	Pyrolitic	WW	NA	NA	<LOD	NA	NA	NA	NA	March-December 1988	01/03/1988	NA	W	Cocchieri et al., 1990	1990	1988	1	NA	NA	NA	NA	NA	0.021287671	0.03	NA
273	IT	Gulf of Naples	37.1.3	Tyrrhenian	40.69191	14.17448	2	Actinopterygii	Scorpaeniformes	Scorpaenidae	Scorpaena scrofa	Red scorpionfish	Scoscr	neritic mesopelagic demersal	3.95	FB	NA	NA	40	NA	NA	NA	Ace	LMW	Petrogenic	WW	NA	NA	<LOD	NA	NA	NA	NA	March-December 1988	01/03/1988	NA	W	Cocchieri et al., 1990	1990	1988	1	NA	NA	NA	NA	NA	0.021287671	0.06	NA
274	IT	Gulf of Naples	37.1.3	Tyrrhenian	40.69191	14.17448	2	Actinopterygii	Scorpaeniformes	Scorpaenidae	Scorpaena scrofa	Red scorpionfish	Scoscr	neritic mesopelagic demersal	3.95	FB	NA	NA	40	NA	NA	NA	Acy	LMW	Petrogenic	WW	NA	0.02	<LOD	0.01	NA	NA	NA	March-December 1988	01/03/1988	NA	W	Cocchieri et al., 1990	1990	1988	1	NA	NA	NA	NA	NA	0.021287671	NA	NA
275	IT	Gulf of Naples	37.1.3	Tyrrhenian	40.69191	14.17448	2	Actinopterygii	Scorpaeniformes	Scorpaenidae	Scorpaena scrofa	Red scorpionfish	Scoscr	neritic mesopelagic demersal	3.95	FB	NA	NA	40	NA	NA	NA	Ant	LMW	Petrogenic	WW	NA	0.001	0.007	0.007	NA	NA	NA	March-December 1988	01/03/1988	NA	W	Cocchieri et al., 1990	1990	1988	1	7.45814E-06	7.45814E-06	NA	NA	NA	0.021287671	0.3	NA
276	IT	Gulf of Naples	37.1.3	Tyrrhenian	40.69191	14.17448	2	Actinopterygii	Scorpaeniformes	Scorpaenidae	Scorpaena scrofa	Red scorpionfish	Scoscr	neritic mesopelagic demersal	3.95	FB	NA	NA	40	NA	NA	NA	BaA	HMW	Pyrolitic	WW	NA	NA	0.014	0.014	NA	NA	NA	March-December 1988	01/03/1988	NA	W	Cocchieri et al., 1990	1990	1988	1	NA	NA	NA	NA	5.36986E-06	0.021287671	NA	1.2
277	IT	Gulf of Naples	37.1.3	Tyrrhenian	40.69191	14.17448	2	Actinopterygii	Scorpaeniformes	Scorpaenidae	Scorpaena scrofa	Red scorpionfish	Scoscr	neritic mesopelagic demersal	3.95	FB	NA	NA	40	NA	NA	NA	BaP	HMW	Pyrolitic	WW	NA	NA	0.007	0.007	NA	NA	NA	March-December 1988	01/03/1988	NA	W	Cocchieri et al., 1990	1990	1988	1	0.007458143	0.007458143	NA	NA	6.48858E-06	0.021287671	0.0003	2.9
278	IT	Gulf of Naples	37.1.3	Tyrrhenian	40.69191	14.17448	2	Actinopterygii	Scorpaeniformes	Scorpaenidae	Scorpaena scrofa	Red scorpionfish	Scoscr	neritic mesopelagic demersal	3.95	FB	NA	NA	40	NA	NA	NA	BbF	HMW	Pyrolitic	WW	NA	NA	<LOD	NA	NA	NA	NA	March-December 1988	01/03/1988	NA	W	Cocchieri et al., 1990	1990	1988	1	NA	NA	NA	NA	NA	0.021287671	NA	1.2
279	IT	Gulf of Naples	37.1.3	Tyrrhenian	40.69191	14.17448	2	Actinopterygii	Scorpaeniformes	Scorpaenidae	Scorpaena scrofa	Red scorpionfish	Scoscr	neritic mesopelagic demersal	3.95	FB	NA	NA	40	NA	NA	NA	BghiP	HMW	Pyrolitic	WW	NA	NA	<LOD	NA	NA	NA	NA	March-December 1988	01/03/1988	NA	W	Cocchieri et al., 1990	1990	1988	1	NA	NA	NA	NA	NA	0.021287671	NA	NA
280	IT	Gulf of Naples	37.1.3	Tyrrhenian	40.69191	14.17448	2	Actinopterygii	Scorpaeniformes	Scorpaenidae	Scorpaena scrofa	Red scorpionfish	Scoscr	neritic mesopelagic demersal	3.95	FB	NA	NA	40	NA	NA	NA	BkF	HMW	Pyrolitic	WW	NA	NA	0.026	0.026	NA	NA	NA	March-December 1988	01/03/1988	NA	W	Cocchieri et al., 1990	1990	1988	1	NA	NA	NA	NA	9.9726E-06	0.021287671	NA	1.2
281	IT	Gulf of Naples	37.1.3	Tyrrhenian	40.69191	14.17448	2	Actinopterygii	Scorpaeniformes	Scorpaenidae	Scorpaena scrofa	Red scorpionfish	Scoscr	neritic mesopelagic demersal	3.95	FB	NA	NA	40	NA	NA	NA	Chr	HMW	Pyrolitic	WW	NA	NA	0.022	0.022	NA	NA	NA	March-December 1988	01/03/1988	NA	W	Cocchieri et al., 1990	1990	1988	1	NA	NA	NA	NA	3.1043E-06	0.021287671	NA	0.441455329
282	IT	Gulf of Naples	37.1.3	Tyrrhenian	40.69191	14.17448	2	Actinopterygii	Scorpaeniformes	Scorpaenidae	Scorpaena scrofa	Red scorpionfish	Scoscr	neritic mesopelagic demersal	3.95	FB	NA	NA	40	NA	NA	NA	DahA	HMW	Pyrolitic	WW	NA	NA	0.029	0.029	NA	NA	NA	March-December 1988	01/03/1988	NA	W	Cocchieri et al., 1990	1990	1988	1	NA	NA	NA	NA	3.80046E-05	0.021287671	NA	4.1
283	IT	Gulf of Naples	37.1.3	Tyrrhenian	40.69191	14.17448	2	Actinopterygii	Scorpaeniformes	Scorpaenidae	Scorpaena scrofa	Red scorpionfish	Scoscr	neritic mesopelagic demersal	3.95	FB	NA	NA	40	NA	NA	NA	Fl	LMW	Petrogenic	WW	NA	NA	<LOD	NA	NA	NA	NA	March-December 1988	01/03/1988	NA	W	Cocchieri et al., 1990	1990	1988	1	NA	NA	NA	NA	NA	0.021287671	0.04	NA
284	IT	Gulf of Naples	37.1.3	Tyrrhenian	40.69191	14.17448	2	Actinopterygii	Scorpaeniformes	Scorpaenidae	Scorpaena scrofa	Red scorpionfish	Scoscr	neritic mesopelagic demersal	3.95	FB	NA	NA	40	NA	NA	NA	Flu	MMW	Pyrolitic	WW	NA	NA	0.008	0.008	NA	NA	NA	March-December 1988	01/03/1988	NA	W	Cocchieri et al., 1990	1990	1988	1	6.39269E-05	6.39269E-05	NA	NA	NA	0.021287671	0.04	NA
285	IT	Gulf of Naples	37.1.3	Tyrrhenian	40.69191	14.17448	2	Actinopterygii	Scorpaeniformes	Scorpaenidae	Scorpaena scrofa	Red scorpionfish	Scoscr	neritic mesopelagic demersal	3.95	FB	NA	NA	40	NA	NA	NA	InP	HMW	Pyrolitic	WW	NA	NA	<LOD	NA	NA	NA	NA	March-December 1988	01/03/1988	NA	W	Cocchieri et al., 1990	1990	1988	1	NA	NA	NA	NA	NA	0.021287671	NA	1.2
286	IT	Gulf of Naples	37.1.3	Tyrrhenian	40.69191	14.17448	2	Actinopterygii	Scorpaeniformes	Scorpaenidae	Scorpaena scrofa	Red scorpionfish	Scoscr	neritic mesopelagic demersal	3.95	FB	NA	NA	40	NA	NA	NA	Nap	LMW	Petrogenic	WW	NA	NA	<LOD	NA	NA	NA	NA	March-December 1988	01/03/1988	NA	W	Cocchieri et al., 1990	1990	1988	1	NA	NA	NA	NA	NA	0.021287671	0.02	0.441455329
287	IT	Gulf of Naples	37.1.3	Tyrrhenian	40.69191	14.17448	2	Actinopterygii	Scorpaeniformes	Scorpaenidae	Scorpaena scrofa	Red scorpionfish	Scoscr	neritic mesopelagic demersal	3.95	FB	NA	NA	40	NA	NA	NA	Phe	LMW	Petrogenic	WW	NA	NA	0.006	0.006	NA	NA	NA	March-December 1988	01/03/1988	NA	W	Cocchieri et al., 1990	1990	1988	1	NA	NA	NA	NA	NA	0.021287671	NA	NA
288	IT	Gulf of Naples	37.1.3	Tyrrhenian	40.69191	14.17448	2	Actinopterygii	Scorpaeniformes	Scorpaenidae	Scorpaena scrofa	Red scorpionfish	Scoscr	neritic mesopelagic demersal	3.95	FB	NA	NA	40	NA	NA	NA	Pyr	MMW	Pyrolitic	WW	NA	NA	<LOD	NA	NA	NA	NA	March-December 1988	01/03/1988	NA	W	Cocchieri et al., 1990	1990	1988	1	NA	NA	NA	NA	NA	0.021287671	0.03	NA
289	IT	Gulf of Naples	37.1.3	Tyrrhenian	40.69191	14.17448	2	Actinopterygii	Scorpaeniformes	Triglidae	Trigla lyra	Piper gurnard	Trilyr	neritic mesopelagic demersal	3.51	FB	NA	NA	54	NA	NA	NA	Ace	LMW	Petrogenic	WW	NA	NA	<LOD	NA	NA	NA	NA	March-December 1988	01/03/1988	NA	W	Cocchieri et al., 1990	1990	1988	1	NA	NA	NA	NA	NA	0.021287671	0.06	NA
290	IT	Gulf of Naples	37.1.3	Tyrrhenian	40.69191	14.17448	2	Actinopterygii	Scorpaeniformes	Triglidae	Trigla lyra	Piper gurnard	Trilyr	neritic mesopelagic demersal	3.51	FB	NA	NA	54	NA	NA	NA	Acy	LMW	Petrogenic	WW	NA	0.02	<LOD	0.01	NA	NA	NA	March-December 1988	01/03/1988	NA	W	Cocchieri et al., 1990	1990	1988	1	NA	NA	NA	NA	NA	0.021287671	NA	NA
291	IT	Gulf of Naples	37.1.3	Tyrrhenian	40.69191	14.17448	2	Actinopterygii	Scorpaeniformes	Triglidae	Trigla lyra	Piper gurnard	Trilyr	neritic mesopelagic demersal	3.51	FB	NA	NA	54	NA	NA	NA	Ant	LMW	Petrogenic	WW	NA	0.001	0.004	0.004	NA	NA	NA	March-December 1988	01/03/1988	NA	W	Cocchieri et al., 1990	1990	1988	1	4.2618E-06	4.2618E-06	NA	NA	NA	0.021287671	0.3	NA
292	IT	Gulf of Naples	37.1.3	Tyrrhenian	40.69191	14.17448	2	Actinopterygii	Scorpaeniformes	Triglidae	Trigla lyra	Piper gurnard	Trilyr	neritic mesopelagic demersal	3.51	FB	NA	NA	54	NA	NA	NA	BaA	HMW	Pyrolitic	WW	NA	NA	0.003	0.003	NA	NA	NA	March-December 1988	01/03/1988	NA	W	Cocchieri et al., 1990	1990	1988	1	NA	NA	NA	NA	1.15068E-06	0.021287671	NA	1.2
293	IT	Gulf of Naples	37.1.3	Tyrrhenian	40.69191	14.17448	2	Actinopterygii	Scorpaeniformes	Triglidae	Trigla lyra	Piper gurnard	Trilyr	neritic mesopelagic demersal	3.51	FB	NA	NA	54	NA	NA	NA	BaP	HMW	Pyrolitic	WW	NA	NA	<LOD	NA	NA	NA	NA	March-December 1988	01/03/1988	NA	W	Cocchieri et al., 1990	1990	1988	1	NA	NA	NA	NA	NA	0.021287671	0.0003	2.9
294	IT	Gulf of Naples	37.1.3	Tyrrhenian	40.69191	14.17448	2	Actinopterygii	Scorpaeniformes	Triglidae	Trigla lyra	Piper gurnard	Trilyr	neritic mesopelagic demersal	3.51	FB	NA	NA	54	NA	NA	NA	BbF	HMW	Pyrolitic	WW	NA	NA	0.064	0.064	NA	NA	NA	March-December 1988	01/03/1988	NA	W	Cocchieri et al., 1990	1990	1988	1	NA	NA	NA	NA	2.45479E-05	0.021287671	NA	1.2
295	IT	Gulf of Naples	37.1.3	Tyrrhenian	40.69191	14.17448	2	Actinopterygii	Scorpaeniformes	Triglidae	Trigla lyra	Piper gurnard	Trilyr	neritic mesopelagic demersal	3.51	FB	NA	NA	54	NA	NA	NA	BghiP	HMW	Pyrolitic	WW	NA	NA	<LOD	NA	NA	NA	NA	March-December 1988	01/03/1988	NA	W	Cocchieri et al., 1990	1990	1988	1	NA	NA	NA	NA	NA	0.021287671	NA	NA
296	IT	Gulf of Naples	37.1.3	Tyrrhenian	40.69191	14.17448	2	Actinopterygii	Scorpaeniformes	Triglidae	Trigla lyra	Piper gurnard	Trilyr	neritic mesopelagic demersal	3.51	FB	NA	NA	54	NA	NA	NA	BkF	HMW	Pyrolitic	WW	NA	NA	<LOD	NA	NA	NA	NA	March-December 1988	01/03/1988	NA	W	Cocchieri et al., 1990	1990	1988	1	NA	NA	NA	NA	NA	0.021287671	NA	1.2
297	IT	Gulf of Naples	37.1.3	Tyrrhenian	40.69191	14.17448	2	Actinopterygii	Scorpaeniformes	Triglidae	Trigla lyra	Piper gurnard	Trilyr	neritic mesopelagic demersal	3.51	FB	NA	NA	54	NA	NA	NA	Chr	HMW	Pyrolitic	WW	NA	NA	0.002	0.002	NA	NA	NA	March-December 1988	01/03/1988	NA	W	Cocchieri et al., 1990	1990	1988	1	NA	NA	NA	NA	2.82209E-07	0.021287671	NA	0.441455329
298	IT	Gulf of Naples	37.1.3	Tyrrhenian	40.69191	14.17448	2	Actinopterygii	Scorpaeniformes	Triglidae	Trigla lyra	Piper gurnard	Trilyr	neritic mesopelagic demersal	3.51	FB	NA	NA	54	NA	NA	NA	DahA	HMW	Pyrolitic	WW	NA	NA	0.005	0.005	NA	NA	NA	March-December 1988	01/03/1988	NA	W	Cocchieri et al., 1990	1990	1988	1	NA	NA	NA	NA	6.55251E-06	0.021287671	NA	4.1
299	IT	Gulf of Naples	37.1.3	Tyrrhenian	40.69191	14.17448	2	Actinopterygii	Scorpaeniformes	Triglidae	Trigla lyra	Piper gurnard	Trilyr	neritic mesopelagic demersal	3.51	FB	NA	NA	54	NA	NA	NA	Fl	LMW	Petrogenic	WW	NA	NA	0.005	0.005	NA	NA	NA	March-December 1988	01/03/1988	NA	W	Cocchieri et al., 1990	1990	1988	1	3.99543E-05	3.99543E-05	NA	NA	NA	0.021287671	0.04	NA
300	IT	Gulf of Naples	37.1.3	Tyrrhenian	40.69191	14.17448	2	Actinopterygii	Scorpaeniformes	Triglidae	Trigla lyra	Piper gurnard	Trilyr	neritic mesopelagic demersal	3.51	FB	NA	NA	54	NA	NA	NA	Flu	MMW	Pyrolitic	WW	NA	NA	0.192	0.192	NA	NA	NA	March-December 1988	01/03/1988	NA	W	Cocchieri et al., 1990	1990	1988	1	0.001534247	0.001534247	NA	NA	NA	0.021287671	0.04	NA
301	IT	Gulf of Naples	37.1.3	Tyrrhenian	40.69191	14.17448	2	Actinopterygii	Scorpaeniformes	Triglidae	Trigla lyra	Piper gurnard	Trilyr	neritic mesopelagic demersal	3.51	FB	NA	NA	54	NA	NA	NA	InP	HMW	Pyrolitic	WW	NA	NA	0.004	0.004	NA	NA	NA	March-December 1988	01/03/1988	NA	W	Cocchieri et al., 1990	1990	1988	1	NA	NA	NA	NA	1.53425E-06	0.021287671	NA	1.2
302	IT	Gulf of Naples	37.1.3	Tyrrhenian	40.69191	14.17448	2	Actinopterygii	Scorpaeniformes	Triglidae	Trigla lyra	Piper gurnard	Trilyr	neritic mesopelagic demersal	3.51	FB	NA	NA	54	NA	NA	NA	Nap	LMW	Petrogenic	WW	NA	NA	<LOD	NA	NA	NA	NA	March-December 1988	01/03/1988	NA	W	Cocchieri et al., 1990	1990	1988	1	NA	NA	NA	NA	NA	0.021287671	0.02	0.441455329
303	IT	Gulf of Naples	37.1.3	Tyrrhenian	40.69191	14.17448	2	Actinopterygii	Scorpaeniformes	Triglidae	Trigla lyra	Piper gurnard	Trilyr	neritic mesopelagic demersal	3.51	FB	NA	NA	54	NA	NA	NA	Phe	LMW	Petrogenic	WW	NA	NA	0.004	0.004	NA	NA	NA	March-December 1988	01/03/1988	NA	W	Cocchieri et al., 1990	1990	1988	1	NA	NA	NA	NA	NA	0.021287671	NA	NA
304	IT	Gulf of Naples	37.1.3	Tyrrhenian	40.69191	14.17448	2	Actinopterygii	Scorpaeniformes	Triglidae	Trigla lyra	Piper gurnard	Trilyr	neritic mesopelagic demersal	3.51	FB	NA	NA	54	NA	NA	NA	Pyr	MMW	Pyrolitic	WW	NA	NA	<LOD	NA	NA	NA	NA	March-December 1988	01/03/1988	NA	W	Cocchieri et al., 1990	1990	1988	1	NA	NA	NA	NA	NA	0.021287671	0.03	NA
305	FR	Ajaccio harbor	37.1.3	Tyrrhenian	41.91192	8.74806	2	Bivalvia	Mytiloida	Mytilidae	Mytilus galloprovincialis	Mediterranean mussel	Mytgal	neritic epipelagic benthic	2.69	SLB	NA	NA	NA	NA	NA	NA	Ant	LMW	Petrogenic	DW	NA	0.00005	0.000946	0.0001419	NA	NA	NA	October 1995	06/10/1995	Autumn	W	Baumard et al., 1998	1998	1995	2	6.95293E-07	1.04294E-07	NA	NA	NA	0.014684932	0.3	NA
306	FR	Ajaccio harbor	37.1.3	Tyrrhenian	41.91192	8.74806	2	Bivalvia	Mytiloida	Mytilidae	Mytilus galloprovincialis	Mediterranean mussel	Mytgal	neritic epipelagic benthic	2.69	SLB	NA	NA	NA	NA	NA	NA	BaA	HMW	Pyrolitic	DW	NA	0.00016	0.00683	0.0010245	NA	NA	NA	October 1995	06/10/1995	Autumn	W	Baumard et al., 1998	1998	1995	2	NA	NA	NA	NA	2.71076E-07	0.014684932	NA	1.2
307	FR	Ajaccio harbor	37.1.3	Tyrrhenian	41.91192	8.74806	2	Bivalvia	Mytiloida	Mytilidae	Mytilus galloprovincialis	Mediterranean mussel	Mytgal	neritic epipelagic benthic	2.69	SLB	NA	NA	NA	NA	NA	NA	BaF	HMW	Pyrolitic	DW	NA	0.00023	0.000751	0.00011265	NA	NA	NA	October 1995	06/10/1995	Autumn	W	Baumard et al., 1998	1998	1995	2	NA	NA	NA	NA	NA	0.014684932	NA	NA
308	FR	Ajaccio harbor	37.1.3	Tyrrhenian	41.91192	8.74806	2	Bivalvia	Mytiloida	Mytilidae	Mytilus galloprovincialis	Mediterranean mussel	Mytgal	neritic epipelagic benthic	2.69	SLB	NA	NA	NA	NA	NA	NA	BaP	HMW	Pyrolitic	DW	NA	0.00035	0.00178	0.000267	NA	NA	NA	October 1995	06/10/1995	Autumn	W	Baumard et al., 1998	1998	1995	2	0.001308267	0.00019624	NA	NA	1.70729E-07	0.014684932	0.0003	2.9
309	FR	Ajaccio harbor	37.1.3	Tyrrhenian	41.91192	8.74806	2	Bivalvia	Mytiloida	Mytilidae	Mytilus galloprovincialis	Mediterranean mussel	Mytgal	neritic epipelagic benthic	2.69	SLB	NA	NA	NA	NA	NA	NA	BeP	HMW	Pyrolitic	DW	NA	0.00041	0.0208	0.00312	NA	NA	NA	October 1995	06/10/1995	Autumn	W	Baumard et al., 1998	1998	1995	2	NA	NA	NA	NA	NA	0.014684932	NA	NA
310	FR	Ajaccio harbor	37.1.3	Tyrrhenian	41.91192	8.74806	2	Bivalvia	Mytiloida	Mytilidae	Mytilus galloprovincialis	Mediterranean mussel	Mytgal	neritic epipelagic benthic	2.69	SLB	NA	NA	NA	NA	NA	NA	BF	HMW	Pyrolitic	DW	NA	0.00050	0.024	0.0036	NA	NA	NA	October 1995	06/10/1995	Autumn	W	Baumard et al., 1998	1998	1995	2	NA	NA	NA	NA	NA	0.014684932	NA	NA
311	FR	Ajaccio harbor	37.1.3	Tyrrhenian	41.91192	8.74806	2	Bivalvia	Mytiloida	Mytilidae	Mytilus galloprovincialis	Mediterranean mussel	Mytgal	neritic epipelagic benthic	2.69	SLB	NA	NA	NA	NA	NA	NA	BghiP	HMW	Pyrolitic	DW	NA	0.00059	0.00623	0.0009345	NA	NA	NA	October 1995	06/10/1995	Autumn	W	Baumard et al., 1998	1998	1995	2	NA	NA	NA	NA	NA	0.014684932	NA	NA
312	FR	Ajaccio harbor	37.1.3	Tyrrhenian	41.91192	8.74806	2	Bivalvia	Mytiloida	Mytilidae	Mytilus galloprovincialis	Mediterranean mussel	Mytgal	neritic epipelagic benthic	2.69	SLB	NA	NA	NA	NA	NA	NA	Chr+Try	HMW	Pyrolitic	DW	NA	0.00068	0.0473	0.007095	NA	NA	NA	October 1995	06/10/1995	Autumn	W	Baumard et al., 1998	1998	1995	2	NA	NA	NA	NA	NA	0.014684932	NA	NA
313	FR	Ajaccio harbor	37.1.3	Tyrrhenian	41.91192	8.74806	2	Bivalvia	Mytiloida	Mytilidae	Mytilus galloprovincialis	Mediterranean mussel	Mytgal	neritic epipelagic benthic	2.69	SLB	NA	NA	NA	NA	NA	NA	Da	HMW	Pyrolitic	DW	NA	0.00077	0.00288	0.000432	NA	NA	NA	October 1995	06/10/1995	Autumn	W	Baumard et al., 1998	1998	1995	2	NA	NA	NA	NA	NA	0.014684932	NA	NA
314	FR	Ajaccio harbor	37.1.3	Tyrrhenian	41.91192	8.74806	2	Bivalvia	Mytiloida	Mytilidae	Mytilus galloprovincialis	Mediterranean mussel	Mytgal	neritic epipelagic benthic	2.69	SLB	NA	NA	NA	NA	NA	NA	Flu	MMW	Pyrolitic	DW	NA	0.00086	0.0185	0.002775	NA	NA	NA	October 1995	06/10/1995	Autumn	W	Baumard et al., 1998	1998	1995	2	0.000101979	1.52968E-05	NA	NA	NA	0.014684932	0.04	NA
315	FR	Ajaccio harbor	37.1.3	Tyrrhenian	41.91192	8.74806	2	Bivalvia	Mytiloida	Mytilidae	Mytilus galloprovincialis	Mediterranean mussel	Mytgal	neritic epipelagic benthic	2.69	SLB	NA	NA	NA	NA	NA	NA	InP	HMW	Pyrolitic	DW	NA	0.00098	0.00309	0.0004635	NA	NA	NA	October 1995	06/10/1995	Autumn	W	Baumard et al., 1998	1998	1995	2	NA	NA	NA	NA	1.22639E-07	0.014684932	NA	1.2
316	FR	Ajaccio harbor	37.1.3	Tyrrhenian	41.91192	8.74806	2	Bivalvia	Mytiloida	Mytilidae	Mytilus galloprovincialis	Mediterranean mussel	Mytgal	neritic epipelagic benthic	2.69	SLB	NA	NA	NA	NA	NA	NA	Per	HMW	Pyrolitic	DW	NA	0.00113	0.000638	0.0000957	NA	NA	NA	October 1995	06/10/1995	Autumn	W	Baumard et al., 1998	1998	1995	2	NA	NA	NA	NA	NA	0.014684932	NA	NA
317	FR	Ajaccio harbor	37.1.3	Tyrrhenian	41.91192	8.74806	2	Bivalvia	Mytiloida	Mytilidae	Mytilus galloprovincialis	Mediterranean mussel	Mytgal	neritic epipelagic benthic	2.69	SLB	NA	NA	NA	NA	NA	NA	Phe	LMW	Petrogenic	DW	NA	0.00122	0.0212	0.00318	NA	NA	NA	October 1995	06/10/1995	Autumn	W	Baumard et al., 1998	1998	1995	2	NA	NA	NA	NA	NA	0.014684932	NA	NA
318	FR	Ajaccio harbor	37.1.3	Tyrrhenian	41.91192	8.74806	2	Bivalvia	Mytiloida	Mytilidae	Mytilus galloprovincialis	Mediterranean mussel	Mytgal	neritic epipelagic benthic	2.69	SLB	NA	NA	NA	NA	NA	NA	Pyr	MMW	Pyrolitic	DW	NA	0.00131	0.0527	0.007905	NA	NA	NA	October 1995	06/10/1995	Autumn	W	Baumard et al., 1998	1998	1995	2	0.000387335	5.81003E-05	NA	NA	NA	0.014684932	0.03	NA
319	FR	Bonifacio	37.1.3	Tyrrhenian	41.37545	9.15968	2	Bivalvia	Mytiloida	Mytilidae	Mytilus galloprovincialis	Mediterranean mussel	Mytgal	neritic epipelagic benthic	2.69	SLB	NA	NA	NA	NA	NA	NA	Ant	LMW	Petrogenic	DW	NA	0.00006	0.002	0.0003	NA	NA	NA	October 1995	06/10/1995	Autumn	W	Baumard et al., 1998	1998	1995	2	1.46996E-06	2.20494E-07	NA	NA	NA	0.014684932	0.3	NA
320	FR	Bonifacio	37.1.3	Tyrrhenian	41.37545	9.15968	2	Bivalvia	Mytiloida	Mytilidae	Mytilus galloprovincialis	Mediterranean mussel	Mytgal	neritic epipelagic benthic	2.69	SLB	NA	NA	NA	NA	NA	NA	BaA	HMW	Pyrolitic	DW	NA	0.00015	0.00957	0.0014355	NA	NA	NA	October 1995	06/10/1995	Autumn	W	Baumard et al., 1998	1998	1995	2	NA	NA	NA	NA	3.79824E-07	0.014684932	NA	1.2
321	FR	Bonifacio	37.1.3	Tyrrhenian	41.37545	9.15968	2	Bivalvia	Mytiloida	Mytilidae	Mytilus galloprovincialis	Mediterranean mussel	Mytgal	neritic epipelagic benthic	2.69	SLB	NA	NA	NA	NA	NA	NA	BaF	HMW	Pyrolitic	DW	NA	0.00024	0.00189	0.0002835	NA	NA	NA	October 1995	06/10/1995	Autumn	W	Baumard et al., 1998	1998	1995	2	NA	NA	NA	NA	NA	0.014684932	NA	NA
322	FR	Bonifacio	37.1.3	Tyrrhenian	41.37545	9.15968	2	Bivalvia	Mytiloida	Mytilidae	Mytilus galloprovincialis	Mediterranean mussel	Mytgal	neritic epipelagic benthic	2.69	SLB	NA	NA	NA	NA	NA	NA	BaP	HMW	Pyrolitic	DW	NA	0.00032	0.00974	0.001461	NA	NA	NA	October 1995	06/10/1995	Autumn	W	Baumard et al., 1998	1998	1995	2	0.00715872	0.001073808	NA	NA	9.34213E-07	0.014684932	0.0003	2.9
323	FR	Bonifacio	37.1.3	Tyrrhenian	41.37545	9.15968	2	Bivalvia	Mytiloida	Mytilidae	Mytilus galloprovincialis	Mediterranean mussel	Mytgal	neritic epipelagic benthic	2.69	SLB	NA	NA	NA	NA	NA	NA	BeP	HMW	Pyrolitic	DW	NA	0.00042	0.00886	0.001329	NA	NA	NA	October 1995	06/10/1995	Autumn	W	Baumard et al., 1998	1998	1995	2	NA	NA	NA	NA	NA	0.014684932	NA	NA
324	FR	Bonifacio	37.1.3	Tyrrhenian	41.37545	9.15968	2	Bivalvia	Mytiloida	Mytilidae	Mytilus galloprovincialis	Mediterranean mussel	Mytgal	neritic epipelagic benthic	2.69	SLB	NA	NA	NA	NA	NA	NA	BF	HMW	Pyrolitic	DW	NA	0.00051	0.0206	0.00309	NA	NA	NA	October 1995	06/10/1995	Autumn	W	Baumard et al., 1998	1998	1995	2	NA	NA	NA	NA	NA	0.014684932	NA	NA
325	FR	Bonifacio	37.1.3	Tyrrhenian	41.37545	9.15968	2	Bivalvia	Mytiloida	Mytilidae	Mytilus galloprovincialis	Mediterranean mussel	Mytgal	neritic epipelagic benthic	2.69	SLB	NA	NA	NA	NA	NA	NA	BghiP	HMW	Pyrolitic	DW	NA	0.00060	0.00639	0.0009585	NA	NA	NA	October 1995	06/10/1995	Autumn	W	Baumard et al., 1998	1998	1995	2	NA	NA	NA	NA	NA	0.014684932	NA	NA
326	FR	Bonifacio	37.1.3	Tyrrhenian	41.37545	9.15968	2	Bivalvia	Mytiloida	Mytilidae	Mytilus galloprovincialis	Mediterranean mussel	Mytgal	neritic epipelagic benthic	2.69	SLB	NA	NA	NA	NA	NA	NA	Chr+Try	HMW	Pyrolitic	DW	NA	0.00069	0.0122	0.00183	NA	NA	NA	October 1995	06/10/1995	Autumn	W	Baumard et al., 1998	1998	1995	2	NA	NA	NA	NA	NA	0.014684932	NA	NA
327	FR	Bonifacio	37.1.3	Tyrrhenian	41.37545	9.15968	2	Bivalvia	Mytiloida	Mytilidae	Mytilus galloprovincialis	Mediterranean mussel	Mytgal	neritic epipelagic benthic	2.69	SLB	NA	NA	NA	NA	NA	NA	Da	HMW	Pyrolitic	DW	NA	0.00078	0.00218	0.000327	NA	NA	NA	October 1995	06/10/1995	Autumn	W	Baumard et al., 1998	1998	1995	2	NA	NA	NA	NA	NA	0.014684932	NA	NA
328	FR	Bonifacio	37.1.3	Tyrrhenian	41.37545	9.15968	2	Bivalvia	Mytiloida	Mytilidae	Mytilus galloprovincialis	Mediterranean mussel	Mytgal	neritic epipelagic benthic	2.69	SLB	NA	NA	NA	NA	NA	NA	Flu	MMW	Pyrolitic	DW	NA	0.00087	0.0123	0.001845	NA	NA	NA	October 1995	06/10/1995	Autumn	W	Baumard et al., 1998	1998	1995	2	6.7802E-05	1.01703E-05	NA	NA	NA	0.014684932	0.04	NA
329	FR	Bonifacio	37.1.3	Tyrrhenian	41.37545	9.15968	2	Bivalvia	Mytiloida	Mytilidae	Mytilus galloprovincialis	Mediterranean mussel	Mytgal	neritic epipelagic benthic	2.69	SLB	NA	NA	NA	NA	NA	NA	InP	HMW	Pyrolitic	DW	NA	0.00095	0.00754	0.001131	NA	NA	NA	October 1995	06/10/1995	Autumn	W	Baumard et al., 1998	1998	1995	2	NA	NA	NA	NA	2.99255E-07	0.014684932	NA	1.2
330	FR	Bonifacio	37.1.3	Tyrrhenian	41.37545	9.15968	2	Bivalvia	Mytiloida	Mytilidae	Mytilus galloprovincialis	Mediterranean mussel	Mytgal	neritic epipelagic benthic	2.69	SLB	NA	NA	NA	NA	NA	NA	Per	HMW	Pyrolitic	DW	NA	0.00114	0.00346	0.000519	NA	NA	NA	October 1995	06/10/1995	Autumn	W	Baumard et al., 1998	1998	1995	2	NA	NA	NA	NA	NA	0.014684932	NA	NA
331	FR	Bonifacio	37.1.3	Tyrrhenian	41.37545	9.15968	2	Bivalvia	Mytiloida	Mytilidae	Mytilus galloprovincialis	Mediterranean mussel	Mytgal	neritic epipelagic benthic	2.69	SLB	NA	NA	NA	NA	NA	NA	Phe	LMW	Petrogenic	DW	NA	0.00123	0.0136	0.00204	NA	NA	NA	October 1995	06/10/1995	Autumn	W	Baumard et al., 1998	1998	1995	2	NA	NA	NA	NA	NA	0.014684932	NA	NA
332	FR	Bonifacio	37.1.3	Tyrrhenian	41.37545	9.15968	2	Bivalvia	Mytiloida	Mytilidae	Mytilus galloprovincialis	Mediterranean mussel	Mytgal	neritic epipelagic benthic	2.69	SLB	NA	NA	NA	NA	NA	NA	Pyr	MMW	Pyrolitic	DW	NA	0.00132	0.0104	0.00156	NA	NA	NA	October 1995	06/10/1995	Autumn	W	Baumard et al., 1998	1998	1995	2	7.64381E-05	1.14657E-05	NA	NA	NA	0.014684932	0.03	NA
333	IT	Castel Sardo	37.1.3	Tyrrhenian	40.92417	8.71259	2	Bivalvia	Mytiloida	Mytilidae	Mytilus galloprovincialis	Mediterranean mussel	Mytgal	neritic epipelagic benthic	2.69	SLB	NA	NA	NA	NA	NA	NA	Ant	LMW	Petrogenic	DW	NA	0.00007	0.00288	0.000432	NA	NA	NA	October 1995	06/10/1995	Autumn	W	Baumard et al., 1998	1998	1995	2	2.11675E-06	3.17512E-07	NA	NA	NA	0.014684932	0.3	NA
334	IT	Castel Sardo	37.1.3	Tyrrhenian	40.92417	8.71259	2	Bivalvia	Mytiloida	Mytilidae	Mytilus galloprovincialis	Mediterranean mussel	Mytgal	neritic epipelagic benthic	2.69	SLB	NA	NA	NA	NA	NA	NA	BaA	HMW	Pyrolitic	DW	NA	0.00017	0.00172	0.000258	NA	NA	NA	October 1995	06/10/1995	Autumn	W	Baumard et al., 1998	1998	1995	2	NA	NA	NA	NA	6.82651E-08	0.014684932	NA	1.2
335	IT	Castel Sardo	37.1.3	Tyrrhenian	40.92417	8.71259	2	Bivalvia	Mytiloida	Mytilidae	Mytilus galloprovincialis	Mediterranean mussel	Mytgal	neritic epipelagic benthic	2.69	SLB	NA	NA	NA	NA	NA	NA	BaF	HMW	Pyrolitic	DW	NA	0.00025	0.000507	0.00007605	NA	NA	NA	October 1995	06/10/1995	Autumn	W	Baumard et al., 1998	1998	1995	2	NA	NA	NA	NA	NA	0.014684932	NA	NA
336	IT	Castel Sardo	37.1.3	Tyrrhenian	40.92417	8.71259	2	Bivalvia	Mytiloida	Mytilidae	Mytilus galloprovincialis	Mediterranean mussel	Mytgal	neritic epipelagic benthic	2.69	SLB	NA	NA	NA	NA	NA	NA	BaP	HMW	Pyrolitic	DW	NA	0.00034	0.00287	0.0004305	NA	NA	NA	October 1995	06/10/1995	Autumn	W	Baumard et al., 1998	1998	1995	2	0.002109397	0.00031641	NA	NA	2.75276E-07	0.014684932	0.0003	2.9
337	IT	Castel Sardo	37.1.3	Tyrrhenian	40.92417	8.71259	2	Bivalvia	Mytiloida	Mytilidae	Mytilus galloprovincialis	Mediterranean mussel	Mytgal	neritic epipelagic benthic	2.69	SLB	NA	NA	NA	NA	NA	NA	BeP	HMW	Pyrolitic	DW	NA	0.00043	0.00595	0.0008925	NA	NA	NA	October 1995	06/10/1995	Autumn	W	Baumard et al., 1998	1998	1995	2	NA	NA	NA	NA	NA	0.014684932	NA	NA
338	IT	Castel Sardo	37.1.3	Tyrrhenian	40.92417	8.71259	2	Bivalvia	Mytiloida	Mytilidae	Mytilus galloprovincialis	Mediterranean mussel	Mytgal	neritic epipelagic benthic	2.69	SLB	NA	NA	NA	NA	NA	NA	BF	HMW	Pyrolitic	DW	NA	0.00052	0.00952	0.001428	NA	NA	NA	October 1995	06/10/1995	Autumn	W	Baumard et al., 1998	1998	1995	2	NA	NA	NA	NA	NA	0.014684932	NA	NA
339	IT	Castel Sardo	37.1.3	Tyrrhenian	40.92417	8.71259	2	Bivalvia	Mytiloida	Mytilidae	Mytilus galloprovincialis	Mediterranean mussel	Mytgal	neritic epipelagic benthic	2.69	SLB	NA	NA	NA	NA	NA	NA	BghiP	HMW	Pyrolitic	DW	NA	0.00061	0.00428	0.000642	NA	NA	NA	October 1995	06/10/1995	Autumn	W	Baumard et al., 1998	1998	1995	2	NA	NA	NA	NA	NA	0.014684932	NA	NA
340	IT	Castel Sardo	37.1.3	Tyrrhenian	40.92417	8.71259	2	Bivalvia	Mytiloida	Mytilidae	Mytilus galloprovincialis	Mediterranean mussel	Mytgal	neritic epipelagic benthic	2.69	SLB	NA	NA	NA	NA	NA	NA	Chr+Try	HMW	Pyrolitic	DW	NA	0.00070	0.00772	0.001158	NA	NA	NA	October 1995	06/10/1995	Autumn	W	Baumard et al., 1998	1998	1995	2	NA	NA	NA	NA	NA	0.014684932	NA	NA
341	IT	Castel Sardo	37.1.3	Tyrrhenian	40.92417	8.71259	2	Bivalvia	Mytiloida	Mytilidae	Mytilus galloprovincialis	Mediterranean mussel	Mytgal	neritic epipelagic benthic	2.69	SLB	NA	NA	NA	NA	NA	NA	Da	HMW	Pyrolitic	DW	NA	0.00079	0.000854	0.0001281	NA	NA	NA	October 1995	06/10/1995	Autumn	W	Baumard et al., 1998	1998	1995	2	NA	NA	NA	NA	NA	0.014684932	NA	NA
342	IT	Castel Sardo	37.1.3	Tyrrhenian	40.92417	8.71259	2	Bivalvia	Mytiloida	Mytilidae	Mytilus galloprovincialis	Mediterranean mussel	Mytgal	neritic epipelagic benthic	2.69	SLB	NA	NA	NA	NA	NA	NA	Flu	MMW	Pyrolitic	DW	NA	0.00088	0.00471	0.0007065	NA	NA	NA	October 1995	06/10/1995	Autumn	W	Baumard et al., 1998	1998	1995	2	2.59632E-05	3.89448E-06	NA	NA	NA	0.014684932	0.04	NA
343	IT	Castel Sardo	37.1.3	Tyrrhenian	40.92417	8.71259	2	Bivalvia	Mytiloida	Mytilidae	Mytilus galloprovincialis	Mediterranean mussel	Mytgal	neritic epipelagic benthic	2.69	SLB	NA	NA	NA	NA	NA	NA	InP	HMW	Pyrolitic	DW	NA	0.00097	0.00331	0.0004965	NA	NA	NA	October 1995	06/10/1995	Autumn	W	Baumard et al., 1998	1998	1995	2	NA	NA	NA	NA	1.31371E-07	0.014684932	NA	1.2
344	IT	Castel Sardo	37.1.3	Tyrrhenian	40.92417	8.71259	2	Bivalvia	Mytiloida	Mytilidae	Mytilus galloprovincialis	Mediterranean mussel	Mytgal	neritic epipelagic benthic	2.69	SLB	NA	NA	NA	NA	NA	NA	Per	HMW	Pyrolitic	DW	NA	0.00115	0.000549	0.00008235	NA	NA	NA	October 1995	06/10/1995	Autumn	W	Baumard et al., 1998	1998	1995	2	NA	NA	NA	NA	NA	0.014684932	NA	NA
345	IT	Castel Sardo	37.1.3	Tyrrhenian	40.92417	8.71259	2	Bivalvia	Mytiloida	Mytilidae	Mytilus galloprovincialis	Mediterranean mussel	Mytgal	neritic epipelagic benthic	2.69	SLB	NA	NA	NA	NA	NA	NA	Phe	LMW	Petrogenic	DW	NA	0.00124	0.0115	0.001725	NA	NA	NA	October 1995	06/10/1995	Autumn	W	Baumard et al., 1998	1998	1995	2	NA	NA	NA	NA	NA	0.014684932	NA	NA
346	IT	Castel Sardo	37.1.3	Tyrrhenian	40.92417	8.71259	2	Bivalvia	Mytiloida	Mytilidae	Mytilus galloprovincialis	Mediterranean mussel	Mytgal	neritic epipelagic benthic	2.69	SLB	NA	NA	NA	NA	NA	NA	Pyr	MMW	Pyrolitic	DW	NA	0.00133	0.00433	0.0006495	NA	NA	NA	October 1995	06/10/1995	Autumn	W	Baumard et al., 1998	1998	1995	2	3.18247E-05	4.77371E-06	NA	NA	NA	0.014684932	0.03	NA
347	FR	Eccica Island	37.1.3	Tyrrhenian	41.58890	8.76732	2	Bivalvia	Mytiloida	Mytilidae	Mytilus galloprovincialis	Mediterranean mussel	Mytgal	neritic epipelagic benthic	2.69	SLB	NA	NA	NA	NA	NA	NA	Ant	LMW	Petrogenic	DW	NA	0.00008	0.000552	0.0000828	NA	NA	NA	October 1995	06/10/1995	Autumn	W	Baumard et al., 1998	1998	1995	2	4.0571E-07	6.08565E-08	NA	NA	NA	0.014684932	0.3	NA
348	FR	Eccica Island	37.1.3	Tyrrhenian	41.58890	8.76732	2	Bivalvia	Mytiloida	Mytilidae	Mytilus galloprovincialis	Mediterranean mussel	Mytgal	neritic epipelagic benthic	2.69	SLB	NA	NA	NA	NA	NA	NA	BaA	HMW	Pyrolitic	DW	NA	0.00020	0.000369	0.00005535	NA	NA	NA	October 1995	06/10/1995	Autumn	W	Baumard et al., 1998	1998	1995	2	NA	NA	NA	NA	1.46452E-08	0.014684932	NA	1.2
349	FR	Eccica Island	37.1.3	Tyrrhenian	41.58890	8.76732	2	Bivalvia	Mytiloida	Mytilidae	Mytilus galloprovincialis	Mediterranean mussel	Mytgal	neritic epipelagic benthic	2.69	SLB	NA	NA	NA	NA	NA	NA	BaF	HMW	Pyrolitic	DW	NA	0.00026	0.000033	0.00000495	NA	NA	NA	October 1995	06/10/1995	Autumn	W	Baumard et al., 1998	1998	1995	2	NA	NA	NA	NA	NA	0.014684932	NA	NA
350	FR	Eccica Island	37.1.3	Tyrrhenian	41.58890	8.76732	2	Bivalvia	Mytiloida	Mytilidae	Mytilus galloprovincialis	Mediterranean mussel	Mytgal	neritic epipelagic benthic	2.69	SLB	NA	NA	NA	NA	NA	NA	BaP	HMW	Pyrolitic	DW	NA	0.00040	0.000222	0.0000333	NA	NA	NA	October 1995	06/10/1995	Autumn	W	Baumard et al., 1998	1998	1995	2	0.000163166	2.44749E-05	NA	NA	2.12932E-08	0.014684932	0.0003	2.9
351	FR	Eccica Island	37.1.3	Tyrrhenian	41.58890	8.76732	2	Bivalvia	Mytiloida	Mytilidae	Mytilus galloprovincialis	Mediterranean mussel	Mytgal	neritic epipelagic benthic	2.69	SLB	NA	NA	NA	NA	NA	NA	BeP	HMW	Pyrolitic	DW	NA	0.00044	0.00194	0.000291	NA	NA	NA	October 1995	06/10/1995	Autumn	W	Baumard et al., 1998	1998	1995	2	NA	NA	NA	NA	NA	0.014684932	NA	NA
352	FR	Eccica Island	37.1.3	Tyrrhenian	41.58890	8.76732	2	Bivalvia	Mytiloida	Mytilidae	Mytilus galloprovincialis	Mediterranean mussel	Mytgal	neritic epipelagic benthic	2.69	SLB	NA	NA	NA	NA	NA	NA	BF	HMW	Pyrolitic	DW	NA	0.00053	0.00336	0.000504	NA	NA	NA	October 1995	06/10/1995	Autumn	W	Baumard et al., 1998	1998	1995	2	NA	NA	NA	NA	NA	0.014684932	NA	NA
353	FR	Eccica Island	37.1.3	Tyrrhenian	41.58890	8.76732	2	Bivalvia	Mytiloida	Mytilidae	Mytilus galloprovincialis	Mediterranean mussel	Mytgal	neritic epipelagic benthic	2.69	SLB	NA	NA	NA	NA	NA	NA	BghiP	HMW	Pyrolitic	DW	NA	0.00062	0.00115	0.0001725	NA	NA	NA	October 1995	06/10/1995	Autumn	W	Baumard et al., 1998	1998	1995	2	NA	NA	NA	NA	NA	0.014684932	NA	NA
354	FR	Eccica Island	37.1.3	Tyrrhenian	41.58890	8.76732	2	Bivalvia	Mytiloida	Mytilidae	Mytilus galloprovincialis	Mediterranean mussel	Mytgal	neritic epipelagic benthic	2.69	SLB	NA	NA	NA	NA	NA	NA	Chr+Try	HMW	Pyrolitic	DW	NA	0.00071	0.00376	0.000564	NA	NA	NA	October 1995	06/10/1995	Autumn	W	Baumard et al., 1998	1998	1995	2	NA	NA	NA	NA	NA	0.014684932	NA	NA
355	FR	Eccica Island	37.1.3	Tyrrhenian	41.58890	8.76732	2	Bivalvia	Mytiloida	Mytilidae	Mytilus galloprovincialis	Mediterranean mussel	Mytgal	neritic epipelagic benthic	2.69	SLB	NA	NA	NA	NA	NA	NA	Da	HMW	Pyrolitic	DW	NA	0.00080	0.000326	0.0000489	NA	NA	NA	October 1995	06/10/1995	Autumn	W	Baumard et al., 1998	1998	1995	2	NA	NA	NA	NA	NA	0.014684932	NA	NA
356	FR	Eccica Island	37.1.3	Tyrrhenian	41.58890	8.76732	2	Bivalvia	Mytiloida	Mytilidae	Mytilus galloprovincialis	Mediterranean mussel	Mytgal	neritic epipelagic benthic	2.69	SLB	NA	NA	NA	NA	NA	NA	Flu	MMW	Pyrolitic	DW	NA	0.00089	0.00162	0.000243	NA	NA	NA	October 1995	06/10/1995	Autumn	W	Baumard et al., 1998	1998	1995	2	8.93003E-06	1.3395E-06	NA	NA	NA	0.014684932	0.04	NA
357	FR	Eccica Island	37.1.3	Tyrrhenian	41.58890	8.76732	2	Bivalvia	Mytiloida	Mytilidae	Mytilus galloprovincialis	Mediterranean mussel	Mytgal	neritic epipelagic benthic	2.69	SLB	NA	NA	NA	NA	NA	NA	InP	HMW	Pyrolitic	DW	NA	0.00102	0.00129	0.0001935	NA	NA	NA	October 1995	06/10/1995	Autumn	W	Baumard et al., 1998	1998	1995	2	NA	NA	NA	NA	5.11988E-08	0.014684932	NA	1.2
358	FR	Eccica Island	37.1.3	Tyrrhenian	41.58890	8.76732	2	Bivalvia	Mytiloida	Mytilidae	Mytilus galloprovincialis	Mediterranean mussel	Mytgal	neritic epipelagic benthic	2.69	SLB	NA	NA	NA	NA	NA	NA	Per	HMW	Pyrolitic	DW	NA	0.00116	0.000112	0.0000168	NA	NA	NA	October 1995	06/10/1995	Autumn	W	Baumard et al., 1998	1998	1995	2	NA	NA	NA	NA	NA	0.014684932	NA	NA
359	FR	Eccica Island	37.1.3	Tyrrhenian	41.58890	8.76732	2	Bivalvia	Mytiloida	Mytilidae	Mytilus galloprovincialis	Mediterranean mussel	Mytgal	neritic epipelagic benthic	2.69	SLB	NA	NA	NA	NA	NA	NA	Phe	LMW	Petrogenic	DW	NA	0.00125	0.00908	0.001362	NA	NA	NA	October 1995	06/10/1995	Autumn	W	Baumard et al., 1998	1998	1995	2	NA	NA	NA	NA	NA	0.014684932	NA	NA
360	FR	Eccica Island	37.1.3	Tyrrhenian	41.58890	8.76732	2	Bivalvia	Mytiloida	Mytilidae	Mytilus galloprovincialis	Mediterranean mussel	Mytgal	neritic epipelagic benthic	2.69	SLB	NA	NA	NA	NA	NA	NA	Pyr	MMW	Pyrolitic	DW	NA	0.00134	0.00215	0.0003225	NA	NA	NA	October 1995	06/10/1995	Autumn	W	Baumard et al., 1998	1998	1995	2	1.58021E-05	2.37032E-06	NA	NA	NA	0.014684932	0.03	NA
361	FR	Punta Rossa	37.1.3	Tyrrhenian	41.16801	9.46985	2	Bivalvia	Mytiloida	Mytilidae	Mytilus galloprovincialis	Mediterranean mussel	Mytgal	neritic epipelagic benthic	2.69	SLB	NA	NA	NA	NA	NA	NA	Ant	LMW	Petrogenic	DW	NA	0.00009	0.00148	0.000222	NA	NA	NA	October 1995	06/10/1995	Autumn	W	Baumard et al., 1998	1998	1995	2	1.08777E-06	1.63166E-07	NA	NA	NA	0.014684932	0.3	NA
362	FR	Punta Rossa	37.1.3	Tyrrhenian	41.16801	9.46985	2	Bivalvia	Mytiloida	Mytilidae	Mytilus galloprovincialis	Mediterranean mussel	Mytgal	neritic epipelagic benthic	2.69	SLB	NA	NA	NA	NA	NA	NA	BaA	HMW	Pyrolitic	DW	NA	0.00021	0.000107	0.00001605	NA	NA	NA	October 1995	06/10/1995	Autumn	W	Baumard et al., 1998	1998	1995	2	NA	NA	NA	NA	4.24672E-09	0.014684932	NA	1.2
363	FR	Punta Rossa	37.1.3	Tyrrhenian	41.16801	9.46985	2	Bivalvia	Mytiloida	Mytilidae	Mytilus galloprovincialis	Mediterranean mussel	Mytgal	neritic epipelagic benthic	2.69	SLB	NA	NA	NA	NA	NA	NA	BaF	HMW	Pyrolitic	DW	NA	0.00027	0.000303	0.00004545	NA	NA	NA	October 1995	06/10/1995	Autumn	W	Baumard et al., 1998	1998	1995	2	NA	NA	NA	NA	NA	0.014684932	NA	NA
364	FR	Punta Rossa	37.1.3	Tyrrhenian	41.16801	9.46985	2	Bivalvia	Mytiloida	Mytilidae	Mytilus galloprovincialis	Mediterranean mussel	Mytgal	neritic epipelagic benthic	2.69	SLB	NA	NA	NA	NA	NA	NA	BaP	HMW	Pyrolitic	DW	NA	0.00037	0.000914	0.0001371	NA	NA	NA	October 1995	06/10/1995	Autumn	W	Baumard et al., 1998	1998	1995	2	0.000671773	0.000100766	NA	NA	8.76664E-08	0.014684932	0.0003	2.9
365	FR	Punta Rossa	37.1.3	Tyrrhenian	41.16801	9.46985	2	Bivalvia	Mytiloida	Mytilidae	Mytilus galloprovincialis	Mediterranean mussel	Mytgal	neritic epipelagic benthic	2.69	SLB	NA	NA	NA	NA	NA	NA	BeP	HMW	Pyrolitic	DW	NA	0.00045	0.00544	0.000816	NA	NA	NA	October 1995	06/10/1995	Autumn	W	Baumard et al., 1998	1998	1995	2	NA	NA	NA	NA	NA	0.014684932	NA	NA
366	FR	Punta Rossa	37.1.3	Tyrrhenian	41.16801	9.46985	2	Bivalvia	Mytiloida	Mytilidae	Mytilus galloprovincialis	Mediterranean mussel	Mytgal	neritic epipelagic benthic	2.69	SLB	NA	NA	NA	NA	NA	NA	BF	HMW	Pyrolitic	DW	NA	0.00054	0.00355	0.0005325	NA	NA	NA	October 1995	06/10/1995	Autumn	W	Baumard et al., 1998	1998	1995	2	NA	NA	NA	NA	NA	0.014684932	NA	NA
367	FR	Punta Rossa	37.1.3	Tyrrhenian	41.16801	9.46985	2	Bivalvia	Mytiloida	Mytilidae	Mytilus galloprovincialis	Mediterranean mussel	Mytgal	neritic epipelagic benthic	2.69	SLB	NA	NA	NA	NA	NA	NA	BghiP	HMW	Pyrolitic	DW	NA	0.00063	0.00168	0.000252	NA	NA	NA	October 1995	06/10/1995	Autumn	W	Baumard et al., 1998	1998	1995	2	NA	NA	NA	NA	NA	0.014684932	NA	NA
368	FR	Punta Rossa	37.1.3	Tyrrhenian	41.16801	9.46985	2	Bivalvia	Mytiloida	Mytilidae	Mytilus galloprovincialis	Mediterranean mussel	Mytgal	neritic epipelagic benthic	2.69	SLB	NA	NA	NA	NA	NA	NA	Chr+Try	HMW	Pyrolitic	DW	NA	0.00072	0.00434	0.000651	NA	NA	NA	October 1995	06/10/1995	Autumn	W	Baumard et al., 1998	1998	1995	2	NA	NA	NA	NA	NA	0.014684932	NA	NA
369	FR	Punta Rossa	37.1.3	Tyrrhenian	41.16801	9.46985	2	Bivalvia	Mytiloida	Mytilidae	Mytilus galloprovincialis	Mediterranean mussel	Mytgal	neritic epipelagic benthic	2.69	SLB	NA	NA	NA	NA	NA	NA	Da	HMW	Pyrolitic	DW	NA	0.00081	0.000239	0.00003585	NA	NA	NA	October 1995	06/10/1995	Autumn	W	Baumard et al., 1998	1998	1995	2	NA	NA	NA	NA	NA	0.014684932	NA	NA
370	FR	Punta Rossa	37.1.3	Tyrrhenian	41.16801	9.46985	2	Bivalvia	Mytiloida	Mytilidae	Mytilus galloprovincialis	Mediterranean mussel	Mytgal	neritic epipelagic benthic	2.69	SLB	NA	NA	NA	NA	NA	NA	Flu	MMW	Pyrolitic	DW	NA	0.00090	0.00246	0.000369	NA	NA	NA	October 1995	06/10/1995	Autumn	W	Baumard et al., 1998	1998	1995	2	1.35604E-05	2.03406E-06	NA	NA	NA	0.014684932	0.04	NA
371	FR	Punta Rossa	37.1.3	Tyrrhenian	41.16801	9.46985	2	Bivalvia	Mytiloida	Mytilidae	Mytilus galloprovincialis	Mediterranean mussel	Mytgal	neritic epipelagic benthic	2.69	SLB	NA	NA	NA	NA	NA	NA	InP	HMW	Pyrolitic	DW	NA	0.00100	0.00131	0.0001965	NA	NA	NA	October 1995	06/10/1995	Autumn	W	Baumard et al., 1998	1998	1995	2	NA	NA	NA	NA	5.19926E-08	0.014684932	NA	1.2
372	FR	Punta Rossa	37.1.3	Tyrrhenian	41.16801	9.46985	2	Bivalvia	Mytiloida	Mytilidae	Mytilus galloprovincialis	Mediterranean mussel	Mytgal	neritic epipelagic benthic	2.69	SLB	NA	NA	NA	NA	NA	NA	Per	HMW	Pyrolitic	DW	NA	0.00117	0.000135	0.00002025	NA	NA	NA	October 1995	06/10/1995	Autumn	W	Baumard et al., 1998	1998	1995	2	NA	NA	NA	NA	NA	0.014684932	NA	NA
373	FR	Punta Rossa	37.1.3	Tyrrhenian	41.16801	9.46985	2	Bivalvia	Mytiloida	Mytilidae	Mytilus galloprovincialis	Mediterranean mussel	Mytgal	neritic epipelagic benthic	2.69	SLB	NA	NA	NA	NA	NA	NA	Phe	LMW	Petrogenic	DW	NA	0.00126	0.0128	0.00192	NA	NA	NA	October 1995	06/10/1995	Autumn	W	Baumard et al., 1998	1998	1995	2	NA	NA	NA	NA	NA	0.014684932	NA	NA
374	FR	Punta Rossa	37.1.3	Tyrrhenian	41.16801	9.46985	2	Bivalvia	Mytiloida	Mytilidae	Mytilus galloprovincialis	Mediterranean mussel	Mytgal	neritic epipelagic benthic	2.69	SLB	NA	NA	NA	NA	NA	NA	Pyr	MMW	Pyrolitic	DW	NA	0.00135	0.00242	0.000363	NA	NA	NA	October 1995	06/10/1995	Autumn	W	Baumard et al., 1998	1998	1995	2	1.77866E-05	2.66798E-06	NA	NA	NA	0.014684932	0.03	NA
375	FR	Sanguinaires Islands B	37.1.3	Tyrrhenian	41.88084	8.59110	2	Bivalvia	Mytiloida	Mytilidae	Mytilus galloprovincialis	Mediterranean mussel	Mytgal	neritic epipelagic benthic	2.69	SLB	NA	NA	NA	NA	NA	NA	Ant	LMW	Petrogenic	DW	NA	0.00010	0.000474	0.0000711	NA	NA	NA	October 1995	06/10/1995	Autumn	W	Baumard et al., 1998	1998	1995	2	3.48381E-07	5.22572E-08	NA	NA	NA	0.014684932	0.3	NA
376	FR	Sanguinaires Islands B	37.1.3	Tyrrhenian	41.88084	8.59110	2	Bivalvia	Mytiloida	Mytilidae	Mytilus galloprovincialis	Mediterranean mussel	Mytgal	neritic epipelagic benthic	2.69	SLB	NA	NA	NA	NA	NA	NA	BaA	HMW	Pyrolitic	DW	NA	0.00022	0.000099	0.00001485	NA	NA	NA	October 1995	06/10/1995	Autumn	W	Baumard et al., 1998	1998	1995	2	NA	NA	NA	NA	3.92921E-09	0.014684932	NA	1.2
377	FR	Sanguinaires Islands B	37.1.3	Tyrrhenian	41.88084	8.59110	2	Bivalvia	Mytiloida	Mytilidae	Mytilus galloprovincialis	Mediterranean mussel	Mytgal	neritic epipelagic benthic	2.69	SLB	NA	NA	NA	NA	NA	NA	BaF	HMW	Pyrolitic	DW	NA	0.00028	0.00027	0.0000405	NA	NA	NA	October 1995	06/10/1995	Autumn	W	Baumard et al., 1998	1998	1995	2	NA	NA	NA	NA	NA	0.014684932	NA	NA
378	FR	Sanguinaires Islands B	37.1.3	Tyrrhenian	41.88084	8.59110	2	Bivalvia	Mytiloida	Mytilidae	Mytilus galloprovincialis	Mediterranean mussel	Mytgal	neritic epipelagic benthic	2.69	SLB	NA	NA	NA	NA	NA	NA	BaP	HMW	Pyrolitic	DW	NA	0.00036	0.0011	0.000165	NA	NA	NA	October 1995	06/10/1995	Autumn	W	Baumard et al., 1998	1998	1995	2	0.00080848	0.000121272	NA	NA	1.05507E-07	0.014684932	0.0003	2.9
379	FR	Sanguinaires Islands B	37.1.3	Tyrrhenian	41.88084	8.59110	2	Bivalvia	Mytiloida	Mytilidae	Mytilus galloprovincialis	Mediterranean mussel	Mytgal	neritic epipelagic benthic	2.69	SLB	NA	NA	NA	NA	NA	NA	BeP	HMW	Pyrolitic	DW	NA	0.00046	0.0023	0.000345	NA	NA	NA	October 1995	06/10/1995	Autumn	W	Baumard et al., 1998	1998	1995	2	NA	NA	NA	NA	NA	0.014684932	NA	NA
380	FR	Sanguinaires Islands B	37.1.3	Tyrrhenian	41.88084	8.59110	2	Bivalvia	Mytiloida	Mytilidae	Mytilus galloprovincialis	Mediterranean mussel	Mytgal	neritic epipelagic benthic	2.69	SLB	NA	NA	NA	NA	NA	NA	BF	HMW	Pyrolitic	DW	NA	0.00055	0.0036	0.00054	NA	NA	NA	October 1995	06/10/1995	Autumn	W	Baumard et al., 1998	1998	1995	2	NA	NA	NA	NA	NA	0.014684932	NA	NA
381	FR	Sanguinaires Islands B	37.1.3	Tyrrhenian	41.88084	8.59110	2	Bivalvia	Mytiloida	Mytilidae	Mytilus galloprovincialis	Mediterranean mussel	Mytgal	neritic epipelagic benthic	2.69	SLB	NA	NA	NA	NA	NA	NA	BghiP	HMW	Pyrolitic	DW	NA	0.00064	0.00143	0.0002145	NA	NA	NA	October 1995	06/10/1995	Autumn	W	Baumard et al., 1998	1998	1995	2	NA	NA	NA	NA	NA	0.014684932	NA	NA
382	FR	Sanguinaires Islands B	37.1.3	Tyrrhenian	41.88084	8.59110	2	Bivalvia	Mytiloida	Mytilidae	Mytilus galloprovincialis	Mediterranean mussel	Mytgal	neritic epipelagic benthic	2.69	SLB	NA	NA	NA	NA	NA	NA	Chr+Try	HMW	Pyrolitic	DW	NA	0.00073	0.0033	0.000495	NA	NA	NA	October 1995	06/10/1995	Autumn	W	Baumard et al., 1998	1998	1995	2	NA	NA	NA	NA	NA	0.014684932	NA	NA
383	FR	Sanguinaires Islands B	37.1.3	Tyrrhenian	41.88084	8.59110	2	Bivalvia	Mytiloida	Mytilidae	Mytilus galloprovincialis	Mediterranean mussel	Mytgal	neritic epipelagic benthic	2.69	SLB	NA	NA	NA	NA	NA	NA	Da	HMW	Pyrolitic	DW	NA	0.00082	0.000809	0.00012135	NA	NA	NA	October 1995	06/10/1995	Autumn	W	Baumard et al., 1998	1998	1995	2	NA	NA	NA	NA	NA	0.014684932	NA	NA
384	FR	Sanguinaires Islands B	37.1.3	Tyrrhenian	41.88084	8.59110	2	Bivalvia	Mytiloida	Mytilidae	Mytilus galloprovincialis	Mediterranean mussel	Mytgal	neritic epipelagic benthic	2.69	SLB	NA	NA	NA	NA	NA	NA	Flu	MMW	Pyrolitic	DW	NA	0.00091	0.00198	0.000297	NA	NA	NA	October 1995	06/10/1995	Autumn	W	Baumard et al., 1998	1998	1995	2	1.09145E-05	1.63717E-06	NA	NA	NA	0.014684932	0.04	NA
385	FR	Sanguinaires Islands B	37.1.3	Tyrrhenian	41.88084	8.59110	2	Bivalvia	Mytiloida	Mytilidae	Mytilus galloprovincialis	Mediterranean mussel	Mytgal	neritic epipelagic benthic	2.69	SLB	NA	NA	NA	NA	NA	NA	InP	HMW	Pyrolitic	DW	NA	0.00101	0.00131	0.0001965	NA	NA	NA	October 1995	06/10/1995	Autumn	W	Baumard et al., 1998	1998	1995	2	NA	NA	NA	NA	5.19926E-08	0.014684932	NA	1.2
386	FR	Sanguinaires Islands B	37.1.3	Tyrrhenian	41.88084	8.59110	2	Bivalvia	Mytiloida	Mytilidae	Mytilus galloprovincialis	Mediterranean mussel	Mytgal	neritic epipelagic benthic	2.69	SLB	NA	NA	NA	NA	NA	NA	Per	HMW	Pyrolitic	DW	NA	0.00118	0.000446	0.0000669	NA	NA	NA	October 1995	06/10/1995	Autumn	W	Baumard et al., 1998	1998	1995	2	NA	NA	NA	NA	NA	0.014684932	NA	NA
387	FR	Sanguinaires Islands B	37.1.3	Tyrrhenian	41.88084	8.59110	2	Bivalvia	Mytiloida	Mytilidae	Mytilus galloprovincialis	Mediterranean mussel	Mytgal	neritic epipelagic benthic	2.69	SLB	NA	NA	NA	NA	NA	NA	Phe	LMW	Petrogenic	DW	NA	0.00127	0.00745	0.0011175	NA	NA	NA	October 1995	06/10/1995	Autumn	W	Baumard et al., 1998	1998	1995	2	NA	NA	NA	NA	NA	0.014684932	NA	NA
388	FR	Sanguinaires Islands B	37.1.3	Tyrrhenian	41.88084	8.59110	2	Bivalvia	Mytiloida	Mytilidae	Mytilus galloprovincialis	Mediterranean mussel	Mytgal	neritic epipelagic benthic	2.69	SLB	NA	NA	NA	NA	NA	NA	Pyr	MMW	Pyrolitic	DW	NA	0.00136	0.00162	0.000243	NA	NA	NA	October 1995	06/10/1995	Autumn	W	Baumard et al., 1998	1998	1995	2	1.19067E-05	1.78601E-06	NA	NA	NA	0.014684932	0.03	NA
389	FR	Toro Isalnd	37.1.3	Tyrrhenian	41.50836	9.38172	2	Bivalvia	Mytiloida	Mytilidae	Mytilus galloprovincialis	Mediterranean mussel	Mytgal	neritic epipelagic benthic	2.69	SLB	NA	NA	NA	NA	NA	NA	Ant	LMW	Petrogenic	DW	NA	0.00011	0.000921	0.00013815	NA	NA	NA	October 1995	06/10/1995	Autumn	W	Baumard et al., 1998	1998	1995	2	6.76918E-07	1.01538E-07	NA	NA	NA	0.014684932	0.3	NA
390	FR	Toro Isalnd	37.1.3	Tyrrhenian	41.50836	9.38172	2	Bivalvia	Mytiloida	Mytilidae	Mytilus galloprovincialis	Mediterranean mussel	Mytgal	neritic epipelagic benthic	2.69	SLB	NA	NA	NA	NA	NA	NA	BaA	HMW	Pyrolitic	DW	NA	0.00018	0.000508	0.0000762	NA	NA	NA	October 1995	06/10/1995	Autumn	W	Baumard et al., 1998	1998	1995	2	NA	NA	NA	NA	2.0162E-08	0.014684932	NA	1.2
391	FR	Toro Isalnd	37.1.3	Tyrrhenian	41.50836	9.38172	2	Bivalvia	Mytiloida	Mytilidae	Mytilus galloprovincialis	Mediterranean mussel	Mytgal	neritic epipelagic benthic	2.69	SLB	NA	NA	NA	NA	NA	NA	BaF	HMW	Pyrolitic	DW	NA	0.00029	0.000116	0.0000174	NA	NA	NA	October 1995	06/10/1995	Autumn	W	Baumard et al., 1998	1998	1995	2	NA	NA	NA	NA	NA	0.014684932	NA	NA
392	FR	Toro Isalnd	37.1.3	Tyrrhenian	41.50836	9.38172	2	Bivalvia	Mytiloida	Mytilidae	Mytilus galloprovincialis	Mediterranean mussel	Mytgal	neritic epipelagic benthic	2.69	SLB	NA	NA	NA	NA	NA	NA	BaP	HMW	Pyrolitic	DW	NA	0.00038	0.000369	0.00005535	NA	NA	NA	October 1995	06/10/1995	Autumn	W	Baumard et al., 1998	1998	1995	2	0.000271208	4.06812E-05	NA	NA	3.53927E-08	0.014684932	0.0003	2.9
393	FR	Toro Isalnd	37.1.3	Tyrrhenian	41.50836	9.38172	2	Bivalvia	Mytiloida	Mytilidae	Mytilus galloprovincialis	Mediterranean mussel	Mytgal	neritic epipelagic benthic	2.69	SLB	NA	NA	NA	NA	NA	NA	BeP	HMW	Pyrolitic	DW	NA	0.00047	0.00253	0.0003795	NA	NA	NA	October 1995	06/10/1995	Autumn	W	Baumard et al., 1998	1998	1995	2	NA	NA	NA	NA	NA	0.014684932	NA	NA
394	FR	Toro Isalnd	37.1.3	Tyrrhenian	41.50836	9.38172	2	Bivalvia	Mytiloida	Mytilidae	Mytilus galloprovincialis	Mediterranean mussel	Mytgal	neritic epipelagic benthic	2.69	SLB	NA	NA	NA	NA	NA	NA	BF	HMW	Pyrolitic	DW	NA	0.00056	0.00459	0.0006885	NA	NA	NA	October 1995	06/10/1995	Autumn	W	Baumard et al., 1998	1998	1995	2	NA	NA	NA	NA	NA	0.014684932	NA	NA
395	FR	Toro Isalnd	37.1.3	Tyrrhenian	41.50836	9.38172	2	Bivalvia	Mytiloida	Mytilidae	Mytilus galloprovincialis	Mediterranean mussel	Mytgal	neritic epipelagic benthic	2.69	SLB	NA	NA	NA	NA	NA	NA	BghiP	HMW	Pyrolitic	DW	NA	0.00065	0.00154	0.000231	NA	NA	NA	October 1995	06/10/1995	Autumn	W	Baumard et al., 1998	1998	1995	2	NA	NA	NA	NA	NA	0.014684932	NA	NA
396	FR	Toro Isalnd	37.1.3	Tyrrhenian	41.50836	9.38172	2	Bivalvia	Mytiloida	Mytilidae	Mytilus galloprovincialis	Mediterranean mussel	Mytgal	neritic epipelagic benthic	2.69	SLB	NA	NA	NA	NA	NA	NA	Chr+Try	HMW	Pyrolitic	DW	NA	0.00074	0.00492	0.000738	NA	NA	NA	October 1995	06/10/1995	Autumn	W	Baumard et al., 1998	1998	1995	2	NA	NA	NA	NA	NA	0.014684932	NA	NA
397	FR	Toro Isalnd	37.1.3	Tyrrhenian	41.50836	9.38172	2	Bivalvia	Mytiloida	Mytilidae	Mytilus galloprovincialis	Mediterranean mussel	Mytgal	neritic epipelagic benthic	2.69	SLB	NA	NA	NA	NA	NA	NA	Da	HMW	Pyrolitic	DW	NA	0.00083	0.000781	0.00011715	NA	NA	NA	October 1995	06/10/1995	Autumn	W	Baumard et al., 1998	1998	1995	2	NA	NA	NA	NA	NA	0.014684932	NA	NA
398	FR	Toro Isalnd	37.1.3	Tyrrhenian	41.50836	9.38172	2	Bivalvia	Mytiloida	Mytilidae	Mytilus galloprovincialis	Mediterranean mussel	Mytgal	neritic epipelagic benthic	2.69	SLB	NA	NA	NA	NA	NA	NA	Flu	MMW	Pyrolitic	DW	NA	0.00092	0.00121	0.0001815	NA	NA	NA	October 1995	06/10/1995	Autumn	W	Baumard et al., 1998	1998	1995	2	6.66996E-06	1.00049E-06	NA	NA	NA	0.014684932	0.04	NA
399	FR	Toro Isalnd	37.1.3	Tyrrhenian	41.50836	9.38172	2	Bivalvia	Mytiloida	Mytilidae	Mytilus galloprovincialis	Mediterranean mussel	Mytgal	neritic epipelagic benthic	2.69	SLB	NA	NA	NA	NA	NA	NA	InP	HMW	Pyrolitic	DW	NA	0.00099	0.00216	0.000324	NA	NA	NA	October 1995	06/10/1995	Autumn	W	Baumard et al., 1998	1998	1995	2	NA	NA	NA	NA	8.57282E-08	0.014684932	NA	1.2
400	FR	Toro Isalnd	37.1.3	Tyrrhenian	41.50836	9.38172	2	Bivalvia	Mytiloida	Mytilidae	Mytilus galloprovincialis	Mediterranean mussel	Mytgal	neritic epipelagic benthic	2.69	SLB	NA	NA	NA	NA	NA	NA	Per	HMW	Pyrolitic	DW	NA	0.00119	0.000236	0.0000354	NA	NA	NA	October 1995	06/10/1995	Autumn	W	Baumard et al., 1998	1998	1995	2	NA	NA	NA	NA	NA	0.014684932	NA	NA
401	FR	Toro Isalnd	37.1.3	Tyrrhenian	41.50836	9.38172	2	Bivalvia	Mytiloida	Mytilidae	Mytilus galloprovincialis	Mediterranean mussel	Mytgal	neritic epipelagic benthic	2.69	SLB	NA	NA	NA	NA	NA	NA	Phe	LMW	Petrogenic	DW	NA	0.00128	0.00955	0.0014325	NA	NA	NA	October 1995	06/10/1995	Autumn	W	Baumard et al., 1998	1998	1995	2	NA	NA	NA	NA	NA	0.014684932	NA	NA
402	FR	Toro Isalnd	37.1.3	Tyrrhenian	41.50836	9.38172	2	Bivalvia	Mytiloida	Mytilidae	Mytilus galloprovincialis	Mediterranean mussel	Mytgal	neritic epipelagic benthic	2.69	SLB	NA	NA	NA	NA	NA	NA	Pyr	MMW	Pyrolitic	DW	NA	0.00137	0.00125	0.0001875	NA	NA	NA	October 1995	06/10/1995	Autumn	W	Baumard et al., 1998	1998	1995	2	9.18727E-06	1.37809E-06	NA	NA	NA	0.014684932	0.03	NA
403	IT	Torres Harbor	37.1.3	Tyrrhenian	40.85020	8.41625	2	Bivalvia	Mytiloida	Mytilidae	Mytilus galloprovincialis	Mediterranean mussel	Mytgal	neritic epipelagic benthic	2.69	SLB	NA	NA	NA	NA	NA	NA	Ant	LMW	Petrogenic	DW	NA	0.00012	0.00807	0.0012105	NA	NA	NA	October 1995	06/10/1995	Autumn	W	Baumard et al., 1998	1998	1995	2	5.9313E-06	8.89695E-07	NA	NA	NA	0.014684932	0.3	NA
404	IT	Torres Harbor	37.1.3	Tyrrhenian	40.85020	8.41625	2	Bivalvia	Mytiloida	Mytilidae	Mytilus galloprovincialis	Mediterranean mussel	Mytgal	neritic epipelagic benthic	2.69	SLB	NA	NA	NA	NA	NA	NA	BaA	HMW	Pyrolitic	DW	NA	0.00014	0.0159	0.002385	NA	NA	NA	October 1995	06/10/1995	Autumn	W	Baumard et al., 1998	1998	1995	2	NA	NA	NA	NA	6.31055E-07	0.014684932	NA	1.2
405	IT	Torres Harbor	37.1.3	Tyrrhenian	40.85020	8.41625	2	Bivalvia	Mytiloida	Mytilidae	Mytilus galloprovincialis	Mediterranean mussel	Mytgal	neritic epipelagic benthic	2.69	SLB	NA	NA	NA	NA	NA	NA	BaF	HMW	Pyrolitic	DW	NA	0.00030	0.00177	0.0002655	NA	NA	NA	October 1995	06/10/1995	Autumn	W	Baumard et al., 1998	1998	1995	2	NA	NA	NA	NA	NA	0.014684932	NA	NA
406	IT	Torres Harbor	37.1.3	Tyrrhenian	40.85020	8.41625	2	Bivalvia	Mytiloida	Mytilidae	Mytilus galloprovincialis	Mediterranean mussel	Mytgal	neritic epipelagic benthic	2.69	SLB	NA	NA	NA	NA	NA	NA	BaP	HMW	Pyrolitic	DW	NA	0.00033	0.0073	0.001095	NA	NA	NA	October 1995	06/10/1995	Autumn	W	Baumard et al., 1998	1998	1995	2	0.005365365	0.000804805	NA	NA	7.0018E-07	0.014684932	0.0003	2.9
407	IT	Torres Harbor	37.1.3	Tyrrhenian	40.85020	8.41625	2	Bivalvia	Mytiloida	Mytilidae	Mytilus galloprovincialis	Mediterranean mussel	Mytgal	neritic epipelagic benthic	2.69	SLB	NA	NA	NA	NA	NA	NA	BeP	HMW	Pyrolitic	DW	NA	0.00048	0.0637	0.009555	NA	NA	NA	October 1995	06/10/1995	Autumn	W	Baumard et al., 1998	1998	1995	2	NA	NA	NA	NA	NA	0.014684932	NA	NA
408	IT	Torres Harbor	37.1.3	Tyrrhenian	40.85020	8.41625	2	Bivalvia	Mytiloida	Mytilidae	Mytilus galloprovincialis	Mediterranean mussel	Mytgal	neritic epipelagic benthic	2.69	SLB	NA	NA	NA	NA	NA	NA	BF	HMW	Pyrolitic	DW	NA	0.00057	0.0393	0.005895	NA	NA	NA	October 1995	06/10/1995	Autumn	W	Baumard et al., 1998	1998	1995	2	NA	NA	NA	NA	NA	0.014684932	NA	NA
409	IT	Torres Harbor	37.1.3	Tyrrhenian	40.85020	8.41625	2	Bivalvia	Mytiloida	Mytilidae	Mytilus galloprovincialis	Mediterranean mussel	Mytgal	neritic epipelagic benthic	2.69	SLB	NA	NA	NA	NA	NA	NA	BghiP	HMW	Pyrolitic	DW	NA	0.00066	0.00784	0.001176	NA	NA	NA	October 1995	06/10/1995	Autumn	W	Baumard et al., 1998	1998	1995	2	NA	NA	NA	NA	NA	0.014684932	NA	NA
410	IT	Torres Harbor	37.1.3	Tyrrhenian	40.85020	8.41625	2	Bivalvia	Mytiloida	Mytilidae	Mytilus galloprovincialis	Mediterranean mussel	Mytgal	neritic epipelagic benthic	2.69	SLB	NA	NA	NA	NA	NA	NA	Chr+Try	HMW	Pyrolitic	DW	NA	0.00075	0.142	0.0213	NA	NA	NA	October 1995	06/10/1995	Autumn	W	Baumard et al., 1998	1998	1995	2	NA	NA	NA	NA	NA	0.014684932	NA	NA
411	IT	Torres Harbor	37.1.3	Tyrrhenian	40.85020	8.41625	2	Bivalvia	Mytiloida	Mytilidae	Mytilus galloprovincialis	Mediterranean mussel	Mytgal	neritic epipelagic benthic	2.69	SLB	NA	NA	NA	NA	NA	NA	Da	HMW	Pyrolitic	DW	NA	0.00084	0.00155	0.0002325	NA	NA	NA	October 1995	06/10/1995	Autumn	W	Baumard et al., 1998	1998	1995	2	NA	NA	NA	NA	NA	0.014684932	NA	NA
412	IT	Torres Harbor	37.1.3	Tyrrhenian	40.85020	8.41625	2	Bivalvia	Mytiloida	Mytilidae	Mytilus galloprovincialis	Mediterranean mussel	Mytgal	neritic epipelagic benthic	2.69	SLB	NA	NA	NA	NA	NA	NA	Flu	MMW	Pyrolitic	DW	NA	0.00093	0.02	0.003	NA	NA	NA	October 1995	06/10/1995	Autumn	W	Baumard et al., 1998	1998	1995	2	0.000110247	1.65371E-05	NA	NA	NA	0.014684932	0.04	NA
413	IT	Torres Harbor	37.1.3	Tyrrhenian	40.85020	8.41625	2	Bivalvia	Mytiloida	Mytilidae	Mytilus galloprovincialis	Mediterranean mussel	Mytgal	neritic epipelagic benthic	2.69	SLB	NA	NA	NA	NA	NA	NA	InP	HMW	Pyrolitic	DW	NA	0.00096	0.00489	0.0007335	NA	NA	NA	October 1995	06/10/1995	Autumn	W	Baumard et al., 1998	1998	1995	2	NA	NA	NA	NA	1.94079E-07	0.014684932	NA	1.2
414	IT	Torres Harbor	37.1.3	Tyrrhenian	40.85020	8.41625	2	Bivalvia	Mytiloida	Mytilidae	Mytilus galloprovincialis	Mediterranean mussel	Mytgal	neritic epipelagic benthic	2.69	SLB	NA	NA	NA	NA	NA	NA	Per	HMW	Pyrolitic	DW	NA	0.00120	0.00206	0.000309	NA	NA	NA	October 1995	06/10/1995	Autumn	W	Baumard et al., 1998	1998	1995	2	NA	NA	NA	NA	NA	0.014684932	NA	NA
415	IT	Torres Harbor	37.1.3	Tyrrhenian	40.85020	8.41625	2	Bivalvia	Mytiloida	Mytilidae	Mytilus galloprovincialis	Mediterranean mussel	Mytgal	neritic epipelagic benthic	2.69	SLB	NA	NA	NA	NA	NA	NA	Phe	LMW	Petrogenic	DW	NA	0.00129	0.0274	0.00411	NA	NA	NA	October 1995	06/10/1995	Autumn	W	Baumard et al., 1998	1998	1995	2	NA	NA	NA	NA	NA	0.014684932	NA	NA
416	IT	Torres Harbor	37.1.3	Tyrrhenian	40.85020	8.41625	2	Bivalvia	Mytiloida	Mytilidae	Mytilus galloprovincialis	Mediterranean mussel	Mytgal	neritic epipelagic benthic	2.69	SLB	NA	NA	NA	NA	NA	NA	Pyr	MMW	Pyrolitic	DW	NA	0.00138	0.0479	0.007185	NA	NA	NA	October 1995	06/10/1995	Autumn	W	Baumard et al., 1998	1998	1995	2	0.000352056	5.28084E-05	NA	NA	NA	0.014684932	0.03	NA
417	FR	Vecchio Harbor	37.1.3	Tyrrhenian	41.03419	9.30354	2	Bivalvia	Mytiloida	Mytilidae	Mytilus galloprovincialis	Mediterranean mussel	Mytgal	neritic epipelagic benthic	2.69	SLB	NA	NA	NA	NA	NA	NA	Ant	LMW	Petrogenic	DW	NA	0.00013	0.000843	0.00012645	NA	NA	NA	October 1995	06/10/1995	Autumn	W	Baumard et al., 1998	1998	1995	2	6.19589E-07	9.29384E-08	NA	NA	NA	0.014684932	0.3	NA
418	FR	Vecchio Harbor	37.1.3	Tyrrhenian	41.03419	9.30354	2	Bivalvia	Mytiloida	Mytilidae	Mytilus galloprovincialis	Mediterranean mussel	Mytgal	neritic epipelagic benthic	2.69	SLB	NA	NA	NA	NA	NA	NA	BaA	HMW	Pyrolitic	DW	NA	0.00019	0.000376	0.0000564	NA	NA	NA	October 1995	06/10/1995	Autumn	W	Baumard et al., 1998	1998	1995	2	NA	NA	NA	NA	1.49231E-08	0.014684932	NA	1.2
419	FR	Vecchio Harbor	37.1.3	Tyrrhenian	41.03419	9.30354	2	Bivalvia	Mytiloida	Mytilidae	Mytilus galloprovincialis	Mediterranean mussel	Mytgal	neritic epipelagic benthic	2.69	SLB	NA	NA	NA	NA	NA	NA	BaF	HMW	Pyrolitic	DW	NA	0.00031	0.000171	0.00002565	NA	NA	NA	October 1995	06/10/1995	Autumn	W	Baumard et al., 1998	1998	1995	2	NA	NA	NA	NA	NA	0.014684932	NA	NA
420	FR	Vecchio Harbor	37.1.3	Tyrrhenian	41.03419	9.30354	2	Bivalvia	Mytiloida	Mytilidae	Mytilus galloprovincialis	Mediterranean mussel	Mytgal	neritic epipelagic benthic	2.69	SLB	NA	NA	NA	NA	NA	NA	BaP	HMW	Pyrolitic	DW	NA	0.00039	0.000355	0.00005325	NA	NA	NA	October 1995	06/10/1995	Autumn	W	Baumard et al., 1998	1998	1995	2	0.000260918	3.91378E-05	NA	NA	3.40499E-08	0.014684932	0.0003	2.9
421	FR	Vecchio Harbor	37.1.3	Tyrrhenian	41.03419	9.30354	2	Bivalvia	Mytiloida	Mytilidae	Mytilus galloprovincialis	Mediterranean mussel	Mytgal	neritic epipelagic benthic	2.69	SLB	NA	NA	NA	NA	NA	NA	BeP	HMW	Pyrolitic	DW	NA	0.00049	0.0018	0.00027	NA	NA	NA	October 1995	06/10/1995	Autumn	W	Baumard et al., 1998	1998	1995	2	NA	NA	NA	NA	NA	0.014684932	NA	NA
422	FR	Vecchio Harbor	37.1.3	Tyrrhenian	41.03419	9.30354	2	Bivalvia	Mytiloida	Mytilidae	Mytilus galloprovincialis	Mediterranean mussel	Mytgal	neritic epipelagic benthic	2.69	SLB	NA	NA	NA	NA	NA	NA	BF	HMW	Pyrolitic	DW	NA	0.00058	0.00204	0.000306	NA	NA	NA	October 1995	06/10/1995	Autumn	W	Baumard et al., 1998	1998	1995	2	NA	NA	NA	NA	NA	0.014684932	NA	NA
423	FR	Vecchio Harbor	37.1.3	Tyrrhenian	41.03419	9.30354	2	Bivalvia	Mytiloida	Mytilidae	Mytilus galloprovincialis	Mediterranean mussel	Mytgal	neritic epipelagic benthic	2.69	SLB	NA	NA	NA	NA	NA	NA	BghiP	HMW	Pyrolitic	DW	NA	0.00067	0.00132	0.000198	NA	NA	NA	October 1995	06/10/1995	Autumn	W	Baumard et al., 1998	1998	1995	2	NA	NA	NA	NA	NA	0.014684932	NA	NA
424	FR	Vecchio Harbor	37.1.3	Tyrrhenian	41.03419	9.30354	2	Bivalvia	Mytiloida	Mytilidae	Mytilus galloprovincialis	Mediterranean mussel	Mytgal	neritic epipelagic benthic	2.69	SLB	NA	NA	NA	NA	NA	NA	Chr+Try	HMW	Pyrolitic	DW	NA	0.00076	0.00364	0.000546	NA	NA	NA	October 1995	06/10/1995	Autumn	W	Baumard et al., 1998	1998	1995	2	NA	NA	NA	NA	NA	0.014684932	NA	NA
425	FR	Vecchio Harbor	37.1.3	Tyrrhenian	41.03419	9.30354	2	Bivalvia	Mytiloida	Mytilidae	Mytilus galloprovincialis	Mediterranean mussel	Mytgal	neritic epipelagic benthic	2.69	SLB	NA	NA	NA	NA	NA	NA	Da	HMW	Pyrolitic	DW	NA	0.00085	0.000169	0.00002535	NA	NA	NA	October 1995	06/10/1995	Autumn	W	Baumard et al., 1998	1998	1995	2	NA	NA	NA	NA	NA	0.014684932	NA	NA
426	FR	Vecchio Harbor	37.1.3	Tyrrhenian	41.03419	9.30354	2	Bivalvia	Mytiloida	Mytilidae	Mytilus galloprovincialis	Mediterranean mussel	Mytgal	neritic epipelagic benthic	2.69	SLB	NA	NA	NA	NA	NA	NA	Flu	MMW	Pyrolitic	DW	NA	0.00094	0.00275	0.0004125	NA	NA	NA	October 1995	06/10/1995	Autumn	W	Baumard et al., 1998	1998	1995	2	1.5159E-05	2.27385E-06	NA	NA	NA	0.014684932	0.04	NA
427	FR	Vecchio Harbor	37.1.3	Tyrrhenian	41.03419	9.30354	2	Bivalvia	Mytiloida	Mytilidae	Mytilus galloprovincialis	Mediterranean mussel	Mytgal	neritic epipelagic benthic	2.69	SLB	NA	NA	NA	NA	NA	NA	InP	HMW	Pyrolitic	DW	NA	0.00103	0.000624	0.0000936	NA	NA	NA	October 1995	06/10/1995	Autumn	W	Baumard et al., 1998	1998	1995	2	NA	NA	NA	NA	2.47659E-08	0.014684932	NA	1.2
428	FR	Vecchio Harbor	37.1.3	Tyrrhenian	41.03419	9.30354	2	Bivalvia	Mytiloida	Mytilidae	Mytilus galloprovincialis	Mediterranean mussel	Mytgal	neritic epipelagic benthic	2.69	SLB	NA	NA	NA	NA	NA	NA	Per	HMW	Pyrolitic	DW	NA	0.00121	0.000326	0.0000489	NA	NA	NA	October 1995	06/10/1995	Autumn	W	Baumard et al., 1998	1998	1995	2	NA	NA	NA	NA	NA	0.014684932	NA	NA
429	FR	Vecchio Harbor	37.1.3	Tyrrhenian	41.03419	9.30354	2	Bivalvia	Mytiloida	Mytilidae	Mytilus galloprovincialis	Mediterranean mussel	Mytgal	neritic epipelagic benthic	2.69	SLB	NA	NA	NA	NA	NA	NA	Phe	LMW	Petrogenic	DW	NA	0.00130	0.0086	0.00129	NA	NA	NA	October 1995	06/10/1995	Autumn	W	Baumard et al., 1998	1998	1995	2	NA	NA	NA	NA	NA	0.014684932	NA	NA
430	FR	Vecchio Harbor	37.1.3	Tyrrhenian	41.03419	9.30354	2	Bivalvia	Mytiloida	Mytilidae	Mytilus galloprovincialis	Mediterranean mussel	Mytgal	neritic epipelagic benthic	2.69	SLB	NA	NA	NA	NA	NA	NA	Pyr	MMW	Pyrolitic	DW	NA	0.00139	0.00263	0.0003945	NA	NA	NA	October 1995	06/10/1995	Autumn	W	Baumard et al., 1998	1998	1995	2	1.933E-05	2.8995E-06	NA	NA	NA	0.014684932	0.03	NA
431	IT	Mar Piccolo (Taranto) (Banchine ex Genio)	37.2.2	Ionian	40.49744	17.26686	2	Bivalvia	Mytiloida	Mytilidae	Mytilus galloprovincialis	Mediterranean mussel	Mytgal	neritic epipelagic benthic	2.69	SLB	NA	4.5	1.6	NA	NA	SO	Ant	LMW	Petrogenic	WW	NA	NA	0.02	0.02	NA	NA	180	June-September 1995	01/06/1995	Summer	F	Storelli and Marcotrigiano, 2001	2001	1995	3	1.46996E-05	1.46996E-05	NA	NA	NA	0.014684932	0.3	NA
432	IT	Mar Piccolo (Taranto) (Banchine ex Genio)	37.2.2	Ionian	40.49744	17.26686	2	Bivalvia	Mytiloida	Mytilidae	Mytilus galloprovincialis	Mediterranean mussel	Mytgal	neritic epipelagic benthic	2.69	SLB	NA	4.5	1.6	NA	NA	SO	BaA	HMW	Pyrolitic	WW	NA	NA	0.0001	0.0001	NA	NA	180	June-September 1995	01/06/1995	Summer	F	Storelli and Marcotrigiano, 2001	2001	1995	3	NA	NA	NA	NA	2.64593E-08	0.014684932	NA	1.2
433	IT	Mar Piccolo (Taranto) (Banchine ex Genio)	37.2.2	Ionian	40.49744	17.26686	2	Bivalvia	Mytiloida	Mytilidae	Mytilus galloprovincialis	Mediterranean mussel	Mytgal	neritic epipelagic benthic	2.69	SLB	NA	4.5	1.6	NA	NA	SO	BaP	HMW	Pyrolitic	WW	NA	NA	0.0003	0.0003	NA	NA	180	June-September 1995	01/06/1995	Summer	F	Storelli and Marcotrigiano, 2001	2001	1995	3	0.000220494	0.000220494	NA	NA	1.9183E-07	0.014684932	0.0003	2.9
434	IT	Mar Piccolo (Taranto) (Banchine ex Genio)	37.2.2	Ionian	40.49744	17.26686	2	Bivalvia	Mytiloida	Mytilidae	Mytilus galloprovincialis	Mediterranean mussel	Mytgal	neritic epipelagic benthic	2.69	SLB	NA	4.5	1.6	NA	NA	SO	BghiP	HMW	Pyrolitic	WW	NA	NA	0.0003	0.0003	NA	NA	180	June-September 1995	01/06/1995	Summer	F	Storelli and Marcotrigiano, 2001	2001	1995	3	NA	NA	NA	NA	NA	0.014684932	NA	NA
435	IT	Mar Piccolo (Taranto) (Banchine ex Genio)	37.2.2	Ionian	40.49744	17.26686	2	Bivalvia	Mytiloida	Mytilidae	Mytilus galloprovincialis	Mediterranean mussel	Mytgal	neritic epipelagic benthic	2.69	SLB	NA	4.5	1.6	NA	NA	SO	DahA	HMW	Pyrolitic	WW	NA	NA	<LOD	NA	NA	NA	180	June-September 1995	01/06/1995	Summer	F	Storelli and Marcotrigiano, 2001	2001	1995	3	NA	NA	NA	NA	NA	0.014684932	NA	4.1
436	IT	Mar Piccolo (Taranto) (Banchine ex Genio)	37.2.2	Ionian	40.49744	17.26686	2	Bivalvia	Mytiloida	Mytilidae	Mytilus galloprovincialis	Mediterranean mussel	Mytgal	neritic epipelagic benthic	2.69	SLB	NA	4.5	1.6	NA	NA	SO	Flu	MMW	Pyrolitic	WW	NA	NA	0.0072	0.0072	NA	NA	180	June-September 1995	01/06/1995	Summer	F	Storelli and Marcotrigiano, 2001	2001	1995	3	3.9689E-05	3.9689E-05	NA	NA	NA	0.014684932	0.04	NA
437	IT	Mar Piccolo (Taranto) (Banchine ex Genio)	37.2.2	Ionian	40.49744	17.26686	2	Bivalvia	Mytiloida	Mytilidae	Mytilus galloprovincialis	Mediterranean mussel	Mytgal	neritic epipelagic benthic	2.69	SLB	NA	4.5	1.6	NA	NA	SO	Phe	LMW	Petrogenic	WW	NA	NA	0.0064	0.0064	NA	NA	180	June-September 1995	01/06/1995	Summer	F	Storelli and Marcotrigiano, 2001	2001	1995	3	NA	NA	NA	NA	NA	0.014684932	NA	NA
438	IT	Mar Piccolo (Taranto) (Banchine ex Genio)	37.2.2	Ionian	40.49744	17.26686	2	Bivalvia	Mytiloida	Mytilidae	Mytilus galloprovincialis	Mediterranean mussel	Mytgal	neritic epipelagic benthic	2.69	SLB	NA	4.5	1.6	NA	NA	SO	Pyr	MMW	Pyrolitic	WW	NA	NA	0.0063	0.0063	NA	NA	180	June-September 1995	01/06/1995	Summer	F	Storelli and Marcotrigiano, 2001	2001	1995	3	4.63038E-05	4.63038E-05	NA	NA	NA	0.014684932	0.03	NA
439	IT	Mar Piccolo (Taranto) (Buffoluto)	37.2.2	Ionian	40.49106	17.28073	2	Bivalvia	Mytiloida	Mytilidae	Mytilus galloprovincialis	Mediterranean mussel	Mytgal	neritic epipelagic benthic	2.69	SLB	NA	4.5	1.6	NA	NA	SO	Ant	LMW	Petrogenic	WW	NA	NA	<LOD	NA	NA	NA	180	June-September 1995	01/06/1995	Summer	F	Storelli and Marcotrigiano, 2001	2001	1995	3	NA	NA	NA	NA	NA	0.014684932	0.3	NA
440	IT	Mar Piccolo (Taranto) (Buffoluto)	37.2.2	Ionian	40.49106	17.28073	2	Bivalvia	Mytiloida	Mytilidae	Mytilus galloprovincialis	Mediterranean mussel	Mytgal	neritic epipelagic benthic	2.69	SLB	NA	4.5	1.6	NA	NA	SO	BaA	HMW	Pyrolitic	WW	NA	NA	0.0042	0.0042	NA	NA	180	June-September 1995	01/06/1995	Summer	F	Storelli and Marcotrigiano, 2001	2001	1995	3	NA	NA	NA	NA	1.11129E-06	0.014684932	NA	1.2
441	IT	Mar Piccolo (Taranto) (Buffoluto)	37.2.2	Ionian	40.49106	17.28073	2	Bivalvia	Mytiloida	Mytilidae	Mytilus galloprovincialis	Mediterranean mussel	Mytgal	neritic epipelagic benthic	2.69	SLB	NA	4.5	1.6	NA	NA	SO	BaP	HMW	Pyrolitic	WW	NA	NA	0.0027	0.0027	NA	NA	180	June-September 1995	01/06/1995	Summer	F	Storelli and Marcotrigiano, 2001	2001	1995	3	0.00198445	0.00198445	NA	NA	1.72647E-06	0.014684932	0.0003	2.9
442	IT	Mar Piccolo (Taranto) (Buffoluto)	37.2.2	Ionian	40.49106	17.28073	2	Bivalvia	Mytiloida	Mytilidae	Mytilus galloprovincialis	Mediterranean mussel	Mytgal	neritic epipelagic benthic	2.69	SLB	NA	4.5	1.6	NA	NA	SO	BghiP	HMW	Pyrolitic	WW	NA	NA	0.0004	0.0004	NA	NA	180	June-September 1995	01/06/1995	Summer	F	Storelli and Marcotrigiano, 2001	2001	1995	3	NA	NA	NA	NA	NA	0.014684932	NA	NA
443	IT	Mar Piccolo (Taranto) (Buffoluto)	37.2.2	Ionian	40.49106	17.28073	2	Bivalvia	Mytiloida	Mytilidae	Mytilus galloprovincialis	Mediterranean mussel	Mytgal	neritic epipelagic benthic	2.69	SLB	NA	4.5	1.6	NA	NA	SO	DahA	HMW	Pyrolitic	WW	NA	NA	0.0003	0.0003	NA	NA	180	June-September 1995	01/06/1995	Summer	F	Storelli and Marcotrigiano, 2001	2001	1995	3	NA	NA	NA	NA	2.71208E-07	0.014684932	NA	4.1
444	IT	Mar Piccolo (Taranto) (Buffoluto)	37.2.2	Ionian	40.49106	17.28073	2	Bivalvia	Mytiloida	Mytilidae	Mytilus galloprovincialis	Mediterranean mussel	Mytgal	neritic epipelagic benthic	2.69	SLB	NA	4.5	1.6	NA	NA	SO	Flu	MMW	Pyrolitic	WW	NA	NA	0.0072	0.0072	NA	NA	180	June-September 1995	01/06/1995	Summer	F	Storelli and Marcotrigiano, 2001	2001	1995	3	3.9689E-05	3.9689E-05	NA	NA	NA	0.014684932	0.04	NA
445	IT	Mar Piccolo (Taranto) (Buffoluto)	37.2.2	Ionian	40.49106	17.28073	2	Bivalvia	Mytiloida	Mytilidae	Mytilus galloprovincialis	Mediterranean mussel	Mytgal	neritic epipelagic benthic	2.69	SLB	NA	4.5	1.6	NA	NA	SO	Phe	LMW	Petrogenic	WW	NA	NA	<LOD	NA	NA	NA	180	June-September 1995	01/06/1995	Summer	F	Storelli and Marcotrigiano, 2001	2001	1995	3	NA	NA	NA	NA	NA	0.014684932	NA	NA
446	IT	Mar Piccolo (Taranto) (Buffoluto)	37.2.2	Ionian	40.49106	17.28073	2	Bivalvia	Mytiloida	Mytilidae	Mytilus galloprovincialis	Mediterranean mussel	Mytgal	neritic epipelagic benthic	2.69	SLB	NA	4.5	1.6	NA	NA	SO	Pyr	MMW	Pyrolitic	WW	NA	NA	<LOD	NA	NA	NA	180	June-September 1995	01/06/1995	Summer	F	Storelli and Marcotrigiano, 2001	2001	1995	3	NA	NA	NA	NA	NA	0.014684932	0.03	NA
447	IT	Mar Piccolo (Taranto) (Foce Galeso)	37.2.2	Ionian	40.49964	17.26153	2	Bivalvia	Mytiloida	Mytilidae	Mytilus galloprovincialis	Mediterranean mussel	Mytgal	neritic epipelagic benthic	2.69	SLB	NA	4.5	1.6	NA	NA	SO	Ant	LMW	Petrogenic	WW	NA	NA	0.501	0.501	NA	NA	180	June-September 1995	01/06/1995	Summer	F	Storelli and Marcotrigiano, 2001	2001	1995	3	0.000368226	0.000368226	NA	NA	NA	0.014684932	0.3	NA
448	IT	Mar Piccolo (Taranto) (Foce Galeso)	37.2.2	Ionian	40.49964	17.26153	2	Bivalvia	Mytiloida	Mytilidae	Mytilus galloprovincialis	Mediterranean mussel	Mytgal	neritic epipelagic benthic	2.69	SLB	NA	4.5	1.6	NA	NA	SO	BaA	HMW	Pyrolitic	WW	NA	NA	0.0071	0.0071	NA	NA	180	June-September 1995	01/06/1995	Summer	F	Storelli and Marcotrigiano, 2001	2001	1995	3	NA	NA	NA	NA	1.87861E-06	0.014684932	NA	1.2
449	IT	Mar Piccolo (Taranto) (Foce Galeso)	37.2.2	Ionian	40.49964	17.26153	2	Bivalvia	Mytiloida	Mytilidae	Mytilus galloprovincialis	Mediterranean mussel	Mytgal	neritic epipelagic benthic	2.69	SLB	NA	4.5	1.6	NA	NA	SO	BaP	HMW	Pyrolitic	WW	NA	NA	0.0018	0.0018	NA	NA	180	June-September 1995	01/06/1995	Summer	F	Storelli and Marcotrigiano, 2001	2001	1995	3	0.001322967	0.001322967	NA	NA	1.15098E-06	0.014684932	0.0003	2.9
450	IT	Mar Piccolo (Taranto) (Foce Galeso)	37.2.2	Ionian	40.49964	17.26153	2	Bivalvia	Mytiloida	Mytilidae	Mytilus galloprovincialis	Mediterranean mussel	Mytgal	neritic epipelagic benthic	2.69	SLB	NA	4.5	1.6	NA	NA	SO	BghiP	HMW	Pyrolitic	WW	NA	NA	0.0006	0.0006	NA	NA	180	June-September 1995	01/06/1995	Summer	F	Storelli and Marcotrigiano, 2001	2001	1995	3	NA	NA	NA	NA	NA	0.014684932	NA	NA
451	IT	Mar Piccolo (Taranto) (Foce Galeso)	37.2.2	Ionian	40.49964	17.26153	2	Bivalvia	Mytiloida	Mytilidae	Mytilus galloprovincialis	Mediterranean mussel	Mytgal	neritic epipelagic benthic	2.69	SLB	NA	4.5	1.6	NA	NA	SO	DahA	HMW	Pyrolitic	WW	NA	NA	<LOD	NA	NA	NA	180	June-September 1995	01/06/1995	Summer	F	Storelli and Marcotrigiano, 2001	2001	1995	3	NA	NA	NA	NA	NA	0.014684932	NA	4.1
452	IT	Mar Piccolo (Taranto) (Foce Galeso)	37.2.2	Ionian	40.49964	17.26153	2	Bivalvia	Mytiloida	Mytilidae	Mytilus galloprovincialis	Mediterranean mussel	Mytgal	neritic epipelagic benthic	2.69	SLB	NA	4.5	1.6	NA	NA	SO	Flu	MMW	Pyrolitic	WW	NA	NA	0.0053	0.0053	NA	NA	180	June-September 1995	01/06/1995	Summer	F	Storelli and Marcotrigiano, 2001	2001	1995	3	2.92155E-05	2.92155E-05	NA	NA	NA	0.014684932	0.04	NA
453	IT	Mar Piccolo (Taranto) (Foce Galeso)	37.2.2	Ionian	40.49964	17.26153	2	Bivalvia	Mytiloida	Mytilidae	Mytilus galloprovincialis	Mediterranean mussel	Mytgal	neritic epipelagic benthic	2.69	SLB	NA	4.5	1.6	NA	NA	SO	Phe	LMW	Petrogenic	WW	NA	NA	0.0285	0.0285	NA	NA	180	June-September 1995	01/06/1995	Summer	F	Storelli and Marcotrigiano, 2001	2001	1995	3	NA	NA	NA	NA	NA	0.014684932	NA	NA
454	IT	Mar Piccolo (Taranto) (Foce Galeso)	37.2.2	Ionian	40.49964	17.26153	2	Bivalvia	Mytiloida	Mytilidae	Mytilus galloprovincialis	Mediterranean mussel	Mytgal	neritic epipelagic benthic	2.69	SLB	NA	4.5	1.6	NA	NA	SO	Pyr	MMW	Pyrolitic	WW	NA	NA	0.101	0.101	NA	NA	180	June-September 1995	01/06/1995	Summer	F	Storelli and Marcotrigiano, 2001	2001	1995	3	0.000742331	0.000742331	NA	NA	NA	0.014684932	0.03	NA
455	IT	Mar Piccolo (Taranto) (Lancia Fuoco Belfiore)	37.2.2	Ionian	40.49964	17.29769	2	Bivalvia	Mytiloida	Mytilidae	Mytilus galloprovincialis	Mediterranean mussel	Mytgal	neritic epipelagic benthic	2.69	SLB	NA	4.5	1.6	NA	NA	SO	Ant	LMW	Petrogenic	WW	NA	NA	0.0028	0.0028	NA	NA	180	June-September 1995	01/06/1995	Summer	F	Storelli and Marcotrigiano, 2001	2001	1995	3	2.05795E-06	2.05795E-06	NA	NA	NA	0.014684932	0.3	NA
456	IT	Mar Piccolo (Taranto) (Lancia Fuoco Belfiore)	37.2.2	Ionian	40.49964	17.29769	2	Bivalvia	Mytiloida	Mytilidae	Mytilus galloprovincialis	Mediterranean mussel	Mytgal	neritic epipelagic benthic	2.69	SLB	NA	4.5	1.6	NA	NA	SO	BaA	HMW	Pyrolitic	WW	NA	NA	0.0004	0.0004	NA	NA	180	June-September 1995	01/06/1995	Summer	F	Storelli and Marcotrigiano, 2001	2001	1995	3	NA	NA	NA	NA	1.05837E-07	0.014684932	NA	1.2
457	IT	Mar Piccolo (Taranto) (Lancia Fuoco Belfiore)	37.2.2	Ionian	40.49964	17.29769	2	Bivalvia	Mytiloida	Mytilidae	Mytilus galloprovincialis	Mediterranean mussel	Mytgal	neritic epipelagic benthic	2.69	SLB	NA	4.5	1.6	NA	NA	SO	BaP	HMW	Pyrolitic	WW	NA	NA	<LOD	NA	NA	NA	180	June-September 1995	01/06/1995	Summer	F	Storelli and Marcotrigiano, 2001	2001	1995	3	NA	NA	NA	NA	NA	0.014684932	0.0003	2.9
458	IT	Mar Piccolo (Taranto) (Lancia Fuoco Belfiore)	37.2.2	Ionian	40.49964	17.29769	2	Bivalvia	Mytiloida	Mytilidae	Mytilus galloprovincialis	Mediterranean mussel	Mytgal	neritic epipelagic benthic	2.69	SLB	NA	4.5	1.6	NA	NA	SO	BghiP	HMW	Pyrolitic	WW	NA	NA	0.0001	0.0001	NA	NA	180	June-September 1995	01/06/1995	Summer	F	Storelli and Marcotrigiano, 2001	2001	1995	3	NA	NA	NA	NA	NA	0.014684932	NA	NA
459	IT	Mar Piccolo (Taranto) (Lancia Fuoco Belfiore)	37.2.2	Ionian	40.49964	17.29769	2	Bivalvia	Mytiloida	Mytilidae	Mytilus galloprovincialis	Mediterranean mussel	Mytgal	neritic epipelagic benthic	2.69	SLB	NA	4.5	1.6	NA	NA	SO	DahA	HMW	Pyrolitic	WW	NA	NA	<LOD	NA	NA	NA	180	June-September 1995	01/06/1995	Summer	F	Storelli and Marcotrigiano, 2001	2001	1995	3	NA	NA	NA	NA	NA	0.014684932	NA	4.1
460	IT	Mar Piccolo (Taranto) (Lancia Fuoco Belfiore)	37.2.2	Ionian	40.49964	17.29769	2	Bivalvia	Mytiloida	Mytilidae	Mytilus galloprovincialis	Mediterranean mussel	Mytgal	neritic epipelagic benthic	2.69	SLB	NA	4.5	1.6	NA	NA	SO	Flu	MMW	Pyrolitic	WW	NA	NA	0.0061	0.0061	NA	NA	180	June-September 1995	01/06/1995	Summer	F	Storelli and Marcotrigiano, 2001	2001	1995	3	3.36254E-05	3.36254E-05	NA	NA	NA	0.014684932	0.04	NA
461	IT	Mar Piccolo (Taranto) (Lancia Fuoco Belfiore)	37.2.2	Ionian	40.49964	17.29769	2	Bivalvia	Mytiloida	Mytilidae	Mytilus galloprovincialis	Mediterranean mussel	Mytgal	neritic epipelagic benthic	2.69	SLB	NA	4.5	1.6	NA	NA	SO	Phe	LMW	Petrogenic	WW	NA	NA	0.0048	0.0048	NA	NA	180	June-September 1995	01/06/1995	Summer	F	Storelli and Marcotrigiano, 2001	2001	1995	3	NA	NA	NA	NA	NA	0.014684932	NA	NA
462	IT	Mar Piccolo (Taranto) (Lancia Fuoco Belfiore)	37.2.2	Ionian	40.49964	17.29769	2	Bivalvia	Mytiloida	Mytilidae	Mytilus galloprovincialis	Mediterranean mussel	Mytgal	neritic epipelagic benthic	2.69	SLB	NA	4.5	1.6	NA	NA	SO	Pyr	MMW	Pyrolitic	WW	NA	NA	0.004	0.004	NA	NA	180	June-September 1995	01/06/1995	Summer	F	Storelli and Marcotrigiano, 2001	2001	1995	3	2.93993E-05	2.93993E-05	NA	NA	NA	0.014684932	0.03	NA
463	IT	Mar Piccolo (Taranto) (Punta Penna)	37.2.2	Ionian	40.48284	17.27669	2	Bivalvia	Mytiloida	Mytilidae	Mytilus galloprovincialis	Mediterranean mussel	Mytgal	neritic epipelagic benthic	2.69	SLB	NA	4.5	1.6	NA	NA	SO	Ant	LMW	Petrogenic	WW	NA	NA	0.0206	0.0206	NA	NA	180	June-September 1995	01/06/1995	Summer	F	Storelli and Marcotrigiano, 2001	2001	1995	3	1.51406E-05	1.51406E-05	NA	NA	NA	0.014684932	0.3	NA
464	IT	Mar Piccolo (Taranto) (Punta Penna)	37.2.2	Ionian	40.48284	17.27669	2	Bivalvia	Mytiloida	Mytilidae	Mytilus galloprovincialis	Mediterranean mussel	Mytgal	neritic epipelagic benthic	2.69	SLB	NA	4.5	1.6	NA	NA	SO	BaA	HMW	Pyrolitic	WW	NA	NA	0.0005	0.0005	NA	NA	180	June-September 1995	01/06/1995	Summer	F	Storelli and Marcotrigiano, 2001	2001	1995	3	NA	NA	NA	NA	1.32297E-07	0.014684932	NA	1.2
465	IT	Mar Piccolo (Taranto) (Punta Penna)	37.2.2	Ionian	40.48284	17.27669	2	Bivalvia	Mytiloida	Mytilidae	Mytilus galloprovincialis	Mediterranean mussel	Mytgal	neritic epipelagic benthic	2.69	SLB	NA	4.5	1.6	NA	NA	SO	BaP	HMW	Pyrolitic	WW	NA	NA	0.0002	0.0002	NA	NA	180	June-September 1995	01/06/1995	Summer	F	Storelli and Marcotrigiano, 2001	2001	1995	3	0.000146996	0.000146996	NA	NA	1.27887E-07	0.014684932	0.0003	2.9
466	IT	Mar Piccolo (Taranto) (Punta Penna)	37.2.2	Ionian	40.48284	17.27669	2	Bivalvia	Mytiloida	Mytilidae	Mytilus galloprovincialis	Mediterranean mussel	Mytgal	neritic epipelagic benthic	2.69	SLB	NA	4.5	1.6	NA	NA	SO	BghiP	HMW	Pyrolitic	WW	NA	NA	0.0004	0.0004	NA	NA	180	June-September 1995	01/06/1995	Summer	F	Storelli and Marcotrigiano, 2001	2001	1995	3	NA	NA	NA	NA	NA	0.014684932	NA	NA
467	IT	Mar Piccolo (Taranto) (Punta Penna)	37.2.2	Ionian	40.48284	17.27669	2	Bivalvia	Mytiloida	Mytilidae	Mytilus galloprovincialis	Mediterranean mussel	Mytgal	neritic epipelagic benthic	2.69	SLB	NA	4.5	1.6	NA	NA	SO	DahA	HMW	Pyrolitic	WW	NA	NA	0.0001	0.0001	NA	NA	180	June-September 1995	01/06/1995	Summer	F	Storelli and Marcotrigiano, 2001	2001	1995	3	NA	NA	NA	NA	9.04027E-08	0.014684932	NA	4.1
468	IT	Mar Piccolo (Taranto) (Punta Penna)	37.2.2	Ionian	40.48284	17.27669	2	Bivalvia	Mytiloida	Mytilidae	Mytilus galloprovincialis	Mediterranean mussel	Mytgal	neritic epipelagic benthic	2.69	SLB	NA	4.5	1.6	NA	NA	SO	Flu	MMW	Pyrolitic	WW	NA	NA	0.0033	0.0033	NA	NA	180	June-September 1995	01/06/1995	Summer	F	Storelli and Marcotrigiano, 2001	2001	1995	3	1.81908E-05	1.81908E-05	NA	NA	NA	0.014684932	0.04	NA
469	IT	Mar Piccolo (Taranto) (Punta Penna)	37.2.2	Ionian	40.48284	17.27669	2	Bivalvia	Mytiloida	Mytilidae	Mytilus galloprovincialis	Mediterranean mussel	Mytgal	neritic epipelagic benthic	2.69	SLB	NA	4.5	1.6	NA	NA	SO	Phe	LMW	Petrogenic	WW	NA	NA	0.01	0.01	NA	NA	180	June-September 1995	01/06/1995	Summer	F	Storelli and Marcotrigiano, 2001	2001	1995	3	NA	NA	NA	NA	NA	0.014684932	NA	NA
470	IT	Mar Piccolo (Taranto) (Punta Penna)	37.2.2	Ionian	40.48284	17.27669	2	Bivalvia	Mytiloida	Mytilidae	Mytilus galloprovincialis	Mediterranean mussel	Mytgal	neritic epipelagic benthic	2.69	SLB	NA	4.5	1.6	NA	NA	SO	Pyr	MMW	Pyrolitic	WW	NA	NA	0.0032	0.0032	NA	NA	180	June-September 1995	01/06/1995	Summer	F	Storelli and Marcotrigiano, 2001	2001	1995	3	2.35194E-05	2.35194E-05	NA	NA	NA	0.014684932	0.03	NA
471	IT	Mar Piccolo (Taranto) (Punta Pizzone)	37.2.2	Ionian	40.47635	17.26588	2	Bivalvia	Mytiloida	Mytilidae	Mytilus galloprovincialis	Mediterranean mussel	Mytgal	neritic epipelagic benthic	2.69	SLB	NA	4.5	1.6	NA	NA	SO	Ant	LMW	Petrogenic	WW	NA	NA	0.04	0.04	NA	NA	180	June-September 1995	01/06/1995	Summer	F	Storelli and Marcotrigiano, 2001	2001	1995	3	2.93993E-05	2.93993E-05	NA	NA	NA	0.014684932	0.3	NA
472	IT	Mar Piccolo (Taranto) (Punta Pizzone)	37.2.2	Ionian	40.47635	17.26588	2	Bivalvia	Mytiloida	Mytilidae	Mytilus galloprovincialis	Mediterranean mussel	Mytgal	neritic epipelagic benthic	2.69	SLB	NA	4.5	1.6	NA	NA	SO	BaA	HMW	Pyrolitic	WW	NA	NA	0.0014	0.0014	NA	NA	180	June-September 1995	01/06/1995	Summer	F	Storelli and Marcotrigiano, 2001	2001	1995	3	NA	NA	NA	NA	3.70431E-07	0.014684932	NA	1.2
473	IT	Mar Piccolo (Taranto) (Punta Pizzone)	37.2.2	Ionian	40.47635	17.26588	2	Bivalvia	Mytiloida	Mytilidae	Mytilus galloprovincialis	Mediterranean mussel	Mytgal	neritic epipelagic benthic	2.69	SLB	NA	4.5	1.6	NA	NA	SO	BaP	HMW	Pyrolitic	WW	NA	NA	0.0008	0.0008	NA	NA	180	June-September 1995	01/06/1995	Summer	F	Storelli and Marcotrigiano, 2001	2001	1995	3	0.000587985	0.000587985	NA	NA	5.11547E-07	0.014684932	0.0003	2.9
474	IT	Mar Piccolo (Taranto) (Punta Pizzone)	37.2.2	Ionian	40.47635	17.26588	2	Bivalvia	Mytiloida	Mytilidae	Mytilus galloprovincialis	Mediterranean mussel	Mytgal	neritic epipelagic benthic	2.69	SLB	NA	4.5	1.6	NA	NA	SO	BghiP	HMW	Pyrolitic	WW	NA	NA	0.0003	0.0003	NA	NA	180	June-September 1995	01/06/1995	Summer	F	Storelli and Marcotrigiano, 2001	2001	1995	3	NA	NA	NA	NA	NA	0.014684932	NA	NA
475	IT	Mar Piccolo (Taranto) (Punta Pizzone)	37.2.2	Ionian	40.47635	17.26588	2	Bivalvia	Mytiloida	Mytilidae	Mytilus galloprovincialis	Mediterranean mussel	Mytgal	neritic epipelagic benthic	2.69	SLB	NA	4.5	1.6	NA	NA	SO	DahA	HMW	Pyrolitic	WW	NA	NA	0.0003	0.0003	NA	NA	180	June-September 1995	01/06/1995	Summer	F	Storelli and Marcotrigiano, 2001	2001	1995	3	NA	NA	NA	NA	2.71208E-07	0.014684932	NA	4.1
476	IT	Mar Piccolo (Taranto) (Punta Pizzone)	37.2.2	Ionian	40.47635	17.26588	2	Bivalvia	Mytiloida	Mytilidae	Mytilus galloprovincialis	Mediterranean mussel	Mytgal	neritic epipelagic benthic	2.69	SLB	NA	4.5	1.6	NA	NA	SO	Flu	MMW	Pyrolitic	WW	NA	NA	0.0056	0.0056	NA	NA	180	June-September 1995	01/06/1995	Summer	F	Storelli and Marcotrigiano, 2001	2001	1995	3	3.08692E-05	3.08692E-05	NA	NA	NA	0.014684932	0.04	NA
477	IT	Mar Piccolo (Taranto) (Punta Pizzone)	37.2.2	Ionian	40.47635	17.26588	2	Bivalvia	Mytiloida	Mytilidae	Mytilus galloprovincialis	Mediterranean mussel	Mytgal	neritic epipelagic benthic	2.69	SLB	NA	4.5	1.6	NA	NA	SO	Phe	LMW	Petrogenic	WW	NA	NA	0.0623	0.0623	NA	NA	180	June-September 1995	01/06/1995	Summer	F	Storelli and Marcotrigiano, 2001	2001	1995	3	NA	NA	NA	NA	NA	0.014684932	NA	NA
478	IT	Mar Piccolo (Taranto) (Punta Pizzone)	37.2.2	Ionian	40.47635	17.26588	2	Bivalvia	Mytiloida	Mytilidae	Mytilus galloprovincialis	Mediterranean mussel	Mytgal	neritic epipelagic benthic	2.69	SLB	NA	4.5	1.6	NA	NA	SO	Pyr	MMW	Pyrolitic	WW	NA	NA	0.0046	0.0046	NA	NA	180	June-September 1995	01/06/1995	Summer	F	Storelli and Marcotrigiano, 2001	2001	1995	3	3.38092E-05	3.38092E-05	NA	NA	NA	0.014684932	0.03	NA
479	IT	Mar Piccolo (Taranto) (Vasche Italsider)	37.2.2	Ionian	40.49168	17.23703	2	Bivalvia	Mytiloida	Mytilidae	Mytilus galloprovincialis	Mediterranean mussel	Mytgal	neritic epipelagic benthic	2.69	SLB	NA	4.5	1.6	NA	NA	SO	Ant	LMW	Petrogenic	WW	NA	NA	0.0131	0.0131	NA	NA	180	June-September 1995	01/06/1995	Summer	F	Storelli and Marcotrigiano, 2001	2001	1995	3	9.62826E-06	9.62826E-06	NA	NA	NA	0.014684932	0.3	NA
480	IT	Mar Piccolo (Taranto) (Vasche Italsider)	37.2.2	Ionian	40.49168	17.23703	2	Bivalvia	Mytiloida	Mytilidae	Mytilus galloprovincialis	Mediterranean mussel	Mytgal	neritic epipelagic benthic	2.69	SLB	NA	4.5	1.6	NA	NA	SO	BaA	HMW	Pyrolitic	WW	NA	NA	0.0041	0.0041	NA	NA	180	June-September 1995	01/06/1995	Summer	F	Storelli and Marcotrigiano, 2001	2001	1995	3	NA	NA	NA	NA	1.08483E-06	0.014684932	NA	1.2
481	IT	Mar Piccolo (Taranto) (Vasche Italsider)	37.2.2	Ionian	40.49168	17.23703	2	Bivalvia	Mytiloida	Mytilidae	Mytilus galloprovincialis	Mediterranean mussel	Mytgal	neritic epipelagic benthic	2.69	SLB	NA	4.5	1.6	NA	NA	SO	BaP	HMW	Pyrolitic	WW	NA	NA	<LOD	NA	NA	NA	180	June-September 1995	01/06/1995	Summer	F	Storelli and Marcotrigiano, 2001	2001	1995	3	NA	NA	NA	NA	NA	0.014684932	0.0003	2.9
482	IT	Mar Piccolo (Taranto) (Vasche Italsider)	37.2.2	Ionian	40.49168	17.23703	2	Bivalvia	Mytiloida	Mytilidae	Mytilus galloprovincialis	Mediterranean mussel	Mytgal	neritic epipelagic benthic	2.69	SLB	NA	4.5	1.6	NA	NA	SO	BghiP	HMW	Pyrolitic	WW	NA	NA	0.0001	0.0001	NA	NA	180	June-September 1995	01/06/1995	Summer	F	Storelli and Marcotrigiano, 2001	2001	1995	3	NA	NA	NA	NA	NA	0.014684932	NA	NA
483	IT	Mar Piccolo (Taranto) (Vasche Italsider)	37.2.2	Ionian	40.49168	17.23703	2	Bivalvia	Mytiloida	Mytilidae	Mytilus galloprovincialis	Mediterranean mussel	Mytgal	neritic epipelagic benthic	2.69	SLB	NA	4.5	1.6	NA	NA	SO	DahA	HMW	Pyrolitic	WW	NA	NA	<LOD	NA	NA	NA	180	June-September 1995	01/06/1995	Summer	F	Storelli and Marcotrigiano, 2001	2001	1995	3	NA	NA	NA	NA	NA	0.014684932	NA	4.1
484	IT	Mar Piccolo (Taranto) (Vasche Italsider)	37.2.2	Ionian	40.49168	17.23703	2	Bivalvia	Mytiloida	Mytilidae	Mytilus galloprovincialis	Mediterranean mussel	Mytgal	neritic epipelagic benthic	2.69	SLB	NA	4.5	1.6	NA	NA	SO	Flu	MMW	Pyrolitic	WW	NA	NA	0.0132	0.0132	NA	NA	180	June-September 1995	01/06/1995	Summer	F	Storelli and Marcotrigiano, 2001	2001	1995	3	7.27632E-05	7.27632E-05	NA	NA	NA	0.014684932	0.04	NA
485	IT	Mar Piccolo (Taranto) (Vasche Italsider)	37.2.2	Ionian	40.49168	17.23703	2	Bivalvia	Mytiloida	Mytilidae	Mytilus galloprovincialis	Mediterranean mussel	Mytgal	neritic epipelagic benthic	2.69	SLB	NA	4.5	1.6	NA	NA	SO	Phe	LMW	Petrogenic	WW	NA	NA	0.0181	0.0181	NA	NA	180	June-September 1995	01/06/1995	Summer	F	Storelli and Marcotrigiano, 2001	2001	1995	3	NA	NA	NA	NA	NA	0.014684932	NA	NA
486	IT	Mar Piccolo (Taranto) (Vasche Italsider)	37.2.2	Ionian	40.49168	17.23703	2	Bivalvia	Mytiloida	Mytilidae	Mytilus galloprovincialis	Mediterranean mussel	Mytgal	neritic epipelagic benthic	2.69	SLB	NA	4.5	1.6	NA	NA	SO	Pyr	MMW	Pyrolitic	WW	NA	NA	0.0123	0.0123	NA	NA	180	June-September 1995	01/06/1995	Summer	F	Storelli and Marcotrigiano, 2001	2001	1995	3	9.04027E-05	9.04027E-05	NA	NA	NA	0.014684932	0.03	NA
487	IT	Mar Piccolo (Taranto) (Vasche Italsider�Foce Galeso)	37.2.2	Ionian	40.49952	17.25009	2	Bivalvia	Mytiloida	Mytilidae	Mytilus galloprovincialis	Mediterranean mussel	Mytgal	neritic epipelagic benthic	2.69	SLB	NA	4.5	1.6	NA	NA	SO	Ant	LMW	Petrogenic	WW	NA	NA	0.0106	0.0106	NA	NA	180	June-September 1995	01/06/1995	Summer	F	Storelli and Marcotrigiano, 2001	2001	1995	3	7.7908E-06	7.7908E-06	NA	NA	NA	0.014684932	0.3	NA
488	IT	Mar Piccolo (Taranto) (Vasche Italsider�Foce Galeso)	37.2.2	Ionian	40.49952	17.25009	2	Bivalvia	Mytiloida	Mytilidae	Mytilus galloprovincialis	Mediterranean mussel	Mytgal	neritic epipelagic benthic	2.69	SLB	NA	4.5	1.6	NA	NA	SO	BaA	HMW	Pyrolitic	WW	NA	NA	0.0048	0.0048	NA	NA	180	June-September 1995	01/06/1995	Summer	F	Storelli and Marcotrigiano, 2001	2001	1995	3	NA	NA	NA	NA	1.27005E-06	0.014684932	NA	1.2
489	IT	Mar Piccolo (Taranto) (Vasche Italsider�Foce Galeso)	37.2.2	Ionian	40.49952	17.25009	2	Bivalvia	Mytiloida	Mytilidae	Mytilus galloprovincialis	Mediterranean mussel	Mytgal	neritic epipelagic benthic	2.69	SLB	NA	4.5	1.6	NA	NA	SO	BaP	HMW	Pyrolitic	WW	NA	NA	0.0002	0.0002	NA	NA	180	June-September 1995	01/06/1995	Summer	F	Storelli and Marcotrigiano, 2001	2001	1995	3	0.000146996	0.000146996	NA	NA	1.27887E-07	0.014684932	0.0003	2.9
490	IT	Mar Piccolo (Taranto) (Vasche Italsider�Foce Galeso)	37.2.2	Ionian	40.49952	17.25009	2	Bivalvia	Mytiloida	Mytilidae	Mytilus galloprovincialis	Mediterranean mussel	Mytgal	neritic epipelagic benthic	2.69	SLB	NA	4.5	1.6	NA	NA	SO	BghiP	HMW	Pyrolitic	WW	NA	NA	<LOD	NA	NA	NA	180	June-September 1995	01/06/1995	Summer	F	Storelli and Marcotrigiano, 2001	2001	1995	3	NA	NA	NA	NA	NA	0.014684932	NA	NA
491	IT	Mar Piccolo (Taranto) (Vasche Italsider�Foce Galeso)	37.2.2	Ionian	40.49952	17.25009	2	Bivalvia	Mytiloida	Mytilidae	Mytilus galloprovincialis	Mediterranean mussel	Mytgal	neritic epipelagic benthic	2.69	SLB	NA	4.5	1.6	NA	NA	SO	DahA	HMW	Pyrolitic	WW	NA	NA	<LOD	NA	NA	NA	180	June-September 1995	01/06/1995	Summer	F	Storelli and Marcotrigiano, 2001	2001	1995	3	NA	NA	NA	NA	NA	0.014684932	NA	4.1
492	IT	Mar Piccolo (Taranto) (Vasche Italsider�Foce Galeso)	37.2.2	Ionian	40.49952	17.25009	2	Bivalvia	Mytiloida	Mytilidae	Mytilus galloprovincialis	Mediterranean mussel	Mytgal	neritic epipelagic benthic	2.69	SLB	NA	4.5	1.6	NA	NA	SO	Flu	MMW	Pyrolitic	WW	NA	NA	0.0068	0.0068	NA	NA	180	June-September 1995	01/06/1995	Summer	F	Storelli and Marcotrigiano, 2001	2001	1995	3	3.74841E-05	3.74841E-05	NA	NA	NA	0.014684932	0.04	NA
493	IT	Mar Piccolo (Taranto) (Vasche Italsider�Foce Galeso)	37.2.2	Ionian	40.49952	17.25009	2	Bivalvia	Mytiloida	Mytilidae	Mytilus galloprovincialis	Mediterranean mussel	Mytgal	neritic epipelagic benthic	2.69	SLB	NA	4.5	1.6	NA	NA	SO	Phe	LMW	Petrogenic	WW	NA	NA	0.0395	0.0395	NA	NA	180	June-September 1995	01/06/1995	Summer	F	Storelli and Marcotrigiano, 2001	2001	1995	3	NA	NA	NA	NA	NA	0.014684932	NA	NA
494	IT	Mar Piccolo (Taranto) (Vasche Italsider�Foce Galeso)	37.2.2	Ionian	40.49952	17.25009	2	Bivalvia	Mytiloida	Mytilidae	Mytilus galloprovincialis	Mediterranean mussel	Mytgal	neritic epipelagic benthic	2.69	SLB	NA	4.5	1.6	NA	NA	SO	Pyr	MMW	Pyrolitic	WW	NA	NA	0.0067	0.0067	NA	NA	180	June-September 1995	01/06/1995	Summer	F	Storelli and Marcotrigiano, 2001	2001	1995	3	4.92438E-05	4.92438E-05	NA	NA	NA	0.014684932	0.03	NA
495	IT	Mar Piccolo (Taranto) (Zona Canale)	37.2.2	Ionian	40.48089	17.22993	2	Bivalvia	Mytiloida	Mytilidae	Mytilus galloprovincialis	Mediterranean mussel	Mytgal	neritic epipelagic benthic	2.69	SLB	NA	4.5	1.6	NA	NA	SO	Ant	LMW	Petrogenic	WW	NA	NA	0.0101	0.0101	NA	NA	180	June-September 1995	01/06/1995	Summer	F	Storelli and Marcotrigiano, 2001	2001	1995	3	7.42331E-06	7.42331E-06	NA	NA	NA	0.014684932	0.3	NA
496	IT	Mar Piccolo (Taranto) (Zona Canale)	37.2.2	Ionian	40.48089	17.22993	2	Bivalvia	Mytiloida	Mytilidae	Mytilus galloprovincialis	Mediterranean mussel	Mytgal	neritic epipelagic benthic	2.69	SLB	NA	4.5	1.6	NA	NA	SO	BaA	HMW	Pyrolitic	WW	NA	NA	0.0033	0.0033	NA	NA	180	June-September 1995	01/06/1995	Summer	F	Storelli and Marcotrigiano, 2001	2001	1995	3	NA	NA	NA	NA	8.73158E-07	0.014684932	NA	1.2
497	IT	Mar Piccolo (Taranto) (Zona Canale)	37.2.2	Ionian	40.48089	17.22993	2	Bivalvia	Mytiloida	Mytilidae	Mytilus galloprovincialis	Mediterranean mussel	Mytgal	neritic epipelagic benthic	2.69	SLB	NA	4.5	1.6	NA	NA	SO	BaP	HMW	Pyrolitic	WW	NA	NA	0.0004	0.0004	NA	NA	180	June-September 1995	01/06/1995	Summer	F	Storelli and Marcotrigiano, 2001	2001	1995	3	0.000293993	0.000293993	NA	NA	2.55774E-07	0.014684932	0.0003	2.9
498	IT	Mar Piccolo (Taranto) (Zona Canale)	37.2.2	Ionian	40.48089	17.22993	2	Bivalvia	Mytiloida	Mytilidae	Mytilus galloprovincialis	Mediterranean mussel	Mytgal	neritic epipelagic benthic	2.69	SLB	NA	4.5	1.6	NA	NA	SO	BghiP	HMW	Pyrolitic	WW	NA	NA	0.0002	0.0002	NA	NA	180	June-September 1995	01/06/1995	Summer	F	Storelli and Marcotrigiano, 2001	2001	1995	3	NA	NA	NA	NA	NA	0.014684932	NA	NA
499	IT	Mar Piccolo (Taranto) (Zona Canale)	37.2.2	Ionian	40.48089	17.22993	2	Bivalvia	Mytiloida	Mytilidae	Mytilus galloprovincialis	Mediterranean mussel	Mytgal	neritic epipelagic benthic	2.69	SLB	NA	4.5	1.6	NA	NA	SO	DahA	HMW	Pyrolitic	WW	NA	NA	0.0001	0.0001	NA	NA	180	June-September 1995	01/06/1995	Summer	F	Storelli and Marcotrigiano, 2001	2001	1995	3	NA	NA	NA	NA	9.04027E-08	0.014684932	NA	4.1
500	IT	Mar Piccolo (Taranto) (Zona Canale)	37.2.2	Ionian	40.48089	17.22993	2	Bivalvia	Mytiloida	Mytilidae	Mytilus galloprovincialis	Mediterranean mussel	Mytgal	neritic epipelagic benthic	2.69	SLB	NA	4.5	1.6	NA	NA	SO	Flu	MMW	Pyrolitic	WW	NA	NA	0.0137	0.0137	NA	NA	180	June-September 1995	01/06/1995	Summer	F	Storelli and Marcotrigiano, 2001	2001	1995	3	7.55194E-05	7.55194E-05	NA	NA	NA	0.014684932	0.04	NA
501	IT	Mar Piccolo (Taranto) (Zona Canale)	37.2.2	Ionian	40.48089	17.22993	2	Bivalvia	Mytiloida	Mytilidae	Mytilus galloprovincialis	Mediterranean mussel	Mytgal	neritic epipelagic benthic	2.69	SLB	NA	4.5	1.6	NA	NA	SO	Phe	LMW	Petrogenic	WW	NA	NA	0.0654	0.0654	NA	NA	180	June-September 1995	01/06/1995	Summer	F	Storelli and Marcotrigiano, 2001	2001	1995	3	NA	NA	NA	NA	NA	0.014684932	NA	NA
502	IT	Mar Piccolo (Taranto) (Zona Canale)	37.2.2	Ionian	40.48089	17.22993	2	Bivalvia	Mytiloida	Mytilidae	Mytilus galloprovincialis	Mediterranean mussel	Mytgal	neritic epipelagic benthic	2.69	SLB	NA	4.5	1.6	NA	NA	SO	Pyr	MMW	Pyrolitic	WW	NA	NA	0.0077	0.0077	NA	NA	180	June-September 1995	01/06/1995	Summer	F	Storelli and Marcotrigiano, 2001	2001	1995	3	5.65936E-05	5.65936E-05	NA	NA	NA	0.014684932	0.03	NA
503	IT	Mar Piccolo (Taranto) (Zona Cimino)	37.2.2	Ionian	40.47853	17.31073	2	Bivalvia	Mytiloida	Mytilidae	Mytilus galloprovincialis	Mediterranean mussel	Mytgal	neritic epipelagic benthic	2.69	SLB	NA	4.5	1.6	NA	NA	SO	Ant	LMW	Petrogenic	WW	NA	NA	0.0288	0.0288	NA	NA	180	June-September 1995	01/06/1995	Summer	F	Storelli and Marcotrigiano, 2001	2001	1995	3	2.11675E-05	2.11675E-05	NA	NA	NA	0.014684932	0.3	NA
504	IT	Mar Piccolo (Taranto) (Zona Cimino)	37.2.2	Ionian	40.47853	17.31073	2	Bivalvia	Mytiloida	Mytilidae	Mytilus galloprovincialis	Mediterranean mussel	Mytgal	neritic epipelagic benthic	2.69	SLB	NA	4.5	1.6	NA	NA	SO	BaA	HMW	Pyrolitic	WW	NA	NA	0.0112	0.0112	NA	NA	180	June-September 1995	01/06/1995	Summer	F	Storelli and Marcotrigiano, 2001	2001	1995	3	NA	NA	NA	NA	2.96345E-06	0.014684932	NA	1.2
505	IT	Mar Piccolo (Taranto) (Zona Cimino)	37.2.2	Ionian	40.47853	17.31073	2	Bivalvia	Mytiloida	Mytilidae	Mytilus galloprovincialis	Mediterranean mussel	Mytgal	neritic epipelagic benthic	2.69	SLB	NA	4.5	1.6	NA	NA	SO	BaP	HMW	Pyrolitic	WW	NA	NA	0.0031	0.0031	NA	NA	180	June-September 1995	01/06/1995	Summer	F	Storelli and Marcotrigiano, 2001	2001	1995	3	0.002278443	0.002278443	NA	NA	1.98225E-06	0.014684932	0.0003	2.9
506	IT	Mar Piccolo (Taranto) (Zona Cimino)	37.2.2	Ionian	40.47853	17.31073	2	Bivalvia	Mytiloida	Mytilidae	Mytilus galloprovincialis	Mediterranean mussel	Mytgal	neritic epipelagic benthic	2.69	SLB	NA	4.5	1.6	NA	NA	SO	BghiP	HMW	Pyrolitic	WW	NA	NA	0.0006	0.0006	NA	NA	180	June-September 1995	01/06/1995	Summer	F	Storelli and Marcotrigiano, 2001	2001	1995	3	NA	NA	NA	NA	NA	0.014684932	NA	NA
507	IT	Mar Piccolo (Taranto) (Zona Cimino)	37.2.2	Ionian	40.47853	17.31073	2	Bivalvia	Mytiloida	Mytilidae	Mytilus galloprovincialis	Mediterranean mussel	Mytgal	neritic epipelagic benthic	2.69	SLB	NA	4.5	1.6	NA	NA	SO	DahA	HMW	Pyrolitic	WW	NA	NA	0.0004	0.0004	NA	NA	180	June-September 1995	01/06/1995	Summer	F	Storelli and Marcotrigiano, 2001	2001	1995	3	NA	NA	NA	NA	3.61611E-07	0.014684932	NA	4.1
508	IT	Mar Piccolo (Taranto) (Zona Cimino)	37.2.2	Ionian	40.47853	17.31073	2	Bivalvia	Mytiloida	Mytilidae	Mytilus galloprovincialis	Mediterranean mussel	Mytgal	neritic epipelagic benthic	2.69	SLB	NA	4.5	1.6	NA	NA	SO	Flu	MMW	Pyrolitic	WW	NA	NA	0.0036	0.0036	NA	NA	180	June-September 1995	01/06/1995	Summer	F	Storelli and Marcotrigiano, 2001	2001	1995	3	1.98445E-05	1.98445E-05	NA	NA	NA	0.014684932	0.04	NA
509	IT	Mar Piccolo (Taranto) (Zona Cimino)	37.2.2	Ionian	40.47853	17.31073	2	Bivalvia	Mytiloida	Mytilidae	Mytilus galloprovincialis	Mediterranean mussel	Mytgal	neritic epipelagic benthic	2.69	SLB	NA	4.5	1.6	NA	NA	SO	Phe	LMW	Petrogenic	WW	NA	NA	0.06	0.06	NA	NA	180	June-September 1995	01/06/1995	Summer	F	Storelli and Marcotrigiano, 2001	2001	1995	3	NA	NA	NA	NA	NA	0.014684932	NA	NA
510	IT	Mar Piccolo (Taranto) (Zona Cimino)	37.2.2	Ionian	40.47853	17.31073	2	Bivalvia	Mytiloida	Mytilidae	Mytilus galloprovincialis	Mediterranean mussel	Mytgal	neritic epipelagic benthic	2.69	SLB	NA	4.5	1.6	NA	NA	SO	Pyr	MMW	Pyrolitic	WW	NA	NA	0.0384	0.0384	NA	NA	180	June-September 1995	01/06/1995	Summer	F	Storelli and Marcotrigiano, 2001	2001	1995	3	0.000282233	0.000282233	NA	NA	NA	0.014684932	0.03	NA
511	IT	Cornigliano	37.1.3	Tyrrhenian	44.39167	8.87633	1	Bivalvia	Mytiloida	Mytilidae	Mytilus galloprovincialis	Mediterranean mussel	Mytgal	neritic epipelagic benthic	2.69	SLB	NA	NA	NA	NA	NA	NA	Ant	LMW	Petrogenic	DW	NA	NA	0.0689	0.010335	NA	NA	40	Spring 1999	01/03/1999	Spring	W	Piccardo et al., 2001	2001	1999	4	5.06402E-05	7.59603E-06	NA	NA	NA	0.014684932	0.3	NA
512	IT	Cornigliano	37.1.3	Tyrrhenian	44.39167	8.87633	1	Bivalvia	Mytiloida	Mytilidae	Mytilus galloprovincialis	Mediterranean mussel	Mytgal	neritic epipelagic benthic	2.69	SLB	NA	NA	NA	NA	NA	NA	Ant	LMW	Petrogenic	DW	NA	NA	0.0308	0.00462	NA	NA	40	Spring 1999	01/03/1999	Spring	W	Piccardo et al., 2001	2001	1999	4	2.26374E-05	3.39561E-06	NA	NA	NA	0.014684932	0.3	NA
513	IT	Cornigliano	37.1.3	Tyrrhenian	44.39167	8.87633	1	Bivalvia	Mytiloida	Mytilidae	Mytilus galloprovincialis	Mediterranean mussel	Mytgal	neritic epipelagic benthic	2.69	SLB	NA	NA	NA	NA	NA	NA	BaA	HMW	Pyrolitic	DW	NA	NA	0.2138	0.03207	NA	NA	40	Spring 1999	01/03/1999	Spring	W	Piccardo et al., 2001	2001	1999	4	NA	NA	NA	NA	8.48551E-06	0.014684932	NA	1.2
514	IT	Cornigliano	37.1.3	Tyrrhenian	44.39167	8.87633	1	Bivalvia	Mytiloida	Mytilidae	Mytilus galloprovincialis	Mediterranean mussel	Mytgal	neritic epipelagic benthic	2.69	SLB	NA	NA	NA	NA	NA	NA	BaA	HMW	Pyrolitic	DW	NA	NA	0.1661	0.024915	NA	NA	40	Spring 1999	01/03/1999	Spring	W	Piccardo et al., 2001	2001	1999	4	NA	NA	NA	NA	6.59234E-06	0.014684932	NA	1.2
515	IT	Cornigliano	37.1.3	Tyrrhenian	44.39167	8.87633	1	Bivalvia	Mytiloida	Mytilidae	Mytilus galloprovincialis	Mediterranean mussel	Mytgal	neritic epipelagic benthic	2.69	SLB	NA	NA	NA	NA	NA	NA	BaP	HMW	Pyrolitic	DW	NA	NA	0.1272	0.01908	NA	NA	40	Spring 1999	01/03/1999	Spring	W	Piccardo et al., 2001	2001	1999	4	0.093489654	0.014023448	NA	NA	1.22004E-05	0.014684932	0.0003	2.9
516	IT	Cornigliano	37.1.3	Tyrrhenian	44.39167	8.87633	1	Bivalvia	Mytiloida	Mytilidae	Mytilus galloprovincialis	Mediterranean mussel	Mytgal	neritic epipelagic benthic	2.69	SLB	NA	NA	NA	NA	NA	NA	BaP	HMW	Pyrolitic	DW	NA	NA	0.1032	0.01548	NA	NA	40	Spring 1999	01/03/1999	Spring	W	Piccardo et al., 2001	2001	1999	4	0.075850097	0.011377515	NA	NA	9.89844E-06	0.014684932	0.0003	2.9
517	IT	Cornigliano	37.1.3	Tyrrhenian	44.39167	8.87633	1	Bivalvia	Mytiloida	Mytilidae	Mytilus galloprovincialis	Mediterranean mussel	Mytgal	neritic epipelagic benthic	2.69	SLB	NA	NA	NA	NA	NA	NA	BbF	HMW	Pyrolitic	DW	NA	NA	0.2181	0.032715	NA	NA	40	Spring 1999	01/03/1999	Spring	W	Piccardo et al., 2001	2001	1999	4	NA	NA	NA	NA	8.65617E-06	0.014684932	NA	1.2
518	IT	Cornigliano	37.1.3	Tyrrhenian	44.39167	8.87633	1	Bivalvia	Mytiloida	Mytilidae	Mytilus galloprovincialis	Mediterranean mussel	Mytgal	neritic epipelagic benthic	2.69	SLB	NA	NA	NA	NA	NA	NA	BbF	HMW	Pyrolitic	DW	NA	NA	0.1695	0.025425	NA	NA	40	Spring 1999	01/03/1999	Spring	W	Piccardo et al., 2001	2001	1999	4	NA	NA	NA	NA	6.72729E-06	0.014684932	NA	1.2
519	IT	Cornigliano	37.1.3	Tyrrhenian	44.39167	8.87633	1	Bivalvia	Mytiloida	Mytilidae	Mytilus galloprovincialis	Mediterranean mussel	Mytgal	neritic epipelagic benthic	2.69	SLB	NA	NA	NA	NA	NA	NA	BghiP	HMW	Pyrolitic	DW	NA	NA	0.0887	0.013305	NA	NA	40	Spring 1999	01/03/1999	Spring	W	Piccardo et al., 2001	2001	1999	4	NA	NA	NA	NA	NA	0.014684932	NA	NA
520	IT	Cornigliano	37.1.3	Tyrrhenian	44.39167	8.87633	1	Bivalvia	Mytiloida	Mytilidae	Mytilus galloprovincialis	Mediterranean mussel	Mytgal	neritic epipelagic benthic	2.69	SLB	NA	NA	NA	NA	NA	NA	BghiP	HMW	Pyrolitic	DW	NA	NA	0.0668	0.01002	NA	NA	40	Spring 1999	01/03/1999	Spring	W	Piccardo et al., 2001	2001	1999	4	NA	NA	NA	NA	NA	0.014684932	NA	NA
521	IT	Cornigliano	37.1.3	Tyrrhenian	44.39167	8.87633	1	Bivalvia	Mytiloida	Mytilidae	Mytilus galloprovincialis	Mediterranean mussel	Mytgal	neritic epipelagic benthic	2.69	SLB	NA	NA	NA	NA	NA	NA	BkF	HMW	Pyrolitic	DW	NA	NA	0.0977	0.014655	NA	NA	40	Spring 1999	01/03/1999	Spring	W	Piccardo et al., 2001	2001	1999	4	NA	NA	NA	NA	3.87762E-06	0.014684932	NA	1.2
522	IT	Cornigliano	37.1.3	Tyrrhenian	44.39167	8.87633	1	Bivalvia	Mytiloida	Mytilidae	Mytilus galloprovincialis	Mediterranean mussel	Mytgal	neritic epipelagic benthic	2.69	SLB	NA	NA	NA	NA	NA	NA	BkF	HMW	Pyrolitic	DW	NA	NA	0.0794	0.01191	NA	NA	40	Spring 1999	01/03/1999	Spring	W	Piccardo et al., 2001	2001	1999	4	NA	NA	NA	NA	3.15131E-06	0.014684932	NA	1.2
523	IT	Cornigliano	37.1.3	Tyrrhenian	44.39167	8.87633	1	Bivalvia	Mytiloida	Mytilidae	Mytilus galloprovincialis	Mediterranean mussel	Mytgal	neritic epipelagic benthic	2.69	SLB	NA	NA	NA	NA	NA	NA	Chr	HMW	Pyrolitic	DW	NA	NA	0.154	0.0231	NA	NA	40	Spring 1999	01/03/1999	Spring	W	Piccardo et al., 2001	2001	1999	4	NA	NA	NA	NA	2.24852E-06	0.014684932	NA	0.441455329
524	IT	Cornigliano	37.1.3	Tyrrhenian	44.39167	8.87633	1	Bivalvia	Mytiloida	Mytilidae	Mytilus galloprovincialis	Mediterranean mussel	Mytgal	neritic epipelagic benthic	2.69	SLB	NA	NA	NA	NA	NA	NA	Chr	HMW	Pyrolitic	DW	NA	NA	0.1299	0.019485	NA	NA	40	Spring 1999	01/03/1999	Spring	W	Piccardo et al., 2001	2001	1999	4	NA	NA	NA	NA	1.89664E-06	0.014684932	NA	0.441455329
525	IT	Cornigliano	37.1.3	Tyrrhenian	44.39167	8.87633	1	Bivalvia	Mytiloida	Mytilidae	Mytilus galloprovincialis	Mediterranean mussel	Mytgal	neritic epipelagic benthic	2.69	SLB	NA	NA	NA	NA	NA	NA	DahA	HMW	Pyrolitic	DW	NA	NA	0.0115	0.001725	NA	NA	40	Spring 1999	01/03/1999	Spring	W	Piccardo et al., 2001	2001	1999	4	NA	NA	NA	NA	1.55945E-06	0.014684932	NA	4.1
526	IT	Cornigliano	37.1.3	Tyrrhenian	44.39167	8.87633	1	Bivalvia	Mytiloida	Mytilidae	Mytilus galloprovincialis	Mediterranean mussel	Mytgal	neritic epipelagic benthic	2.69	SLB	NA	NA	NA	NA	NA	NA	DahA	HMW	Pyrolitic	DW	NA	NA	0.007	0.00105	NA	NA	40	Spring 1999	01/03/1999	Spring	W	Piccardo et al., 2001	2001	1999	4	NA	NA	NA	NA	9.49229E-07	0.014684932	NA	4.1
527	IT	Cornigliano	37.1.3	Tyrrhenian	44.39167	8.87633	1	Bivalvia	Mytiloida	Mytilidae	Mytilus galloprovincialis	Mediterranean mussel	Mytgal	neritic epipelagic benthic	2.69	SLB	NA	NA	NA	NA	NA	NA	Flu	MMW	Pyrolitic	DW	NA	NA	0.6099	0.091485	NA	NA	40	Spring 1999	01/03/1999	Spring	W	Piccardo et al., 2001	2001	1999	4	0.003361989	0.000504298	NA	NA	NA	0.014684932	0.04	NA
528	IT	Cornigliano	37.1.3	Tyrrhenian	44.39167	8.87633	1	Bivalvia	Mytiloida	Mytilidae	Mytilus galloprovincialis	Mediterranean mussel	Mytgal	neritic epipelagic benthic	2.69	SLB	NA	NA	NA	NA	NA	NA	Flu	MMW	Pyrolitic	DW	NA	NA	0.3834	0.05751	NA	NA	40	Spring 1999	01/03/1999	Spring	W	Piccardo et al., 2001	2001	1999	4	0.002113439	0.000317016	NA	NA	NA	0.014684932	0.04	NA
529	IT	Cornigliano	37.1.3	Tyrrhenian	44.39167	8.87633	1	Bivalvia	Mytiloida	Mytilidae	Mytilus galloprovincialis	Mediterranean mussel	Mytgal	neritic epipelagic benthic	2.69	SLB	NA	NA	NA	NA	NA	NA	Phe	LMW	Petrogenic	DW	NA	NA	0.2956	0.04434	NA	NA	40	Spring 1999	01/03/1999	Spring	W	Piccardo et al., 2001	2001	1999	4	NA	NA	NA	NA	NA	0.014684932	NA	NA
530	IT	Cornigliano	37.1.3	Tyrrhenian	44.39167	8.87633	1	Bivalvia	Mytiloida	Mytilidae	Mytilus galloprovincialis	Mediterranean mussel	Mytgal	neritic epipelagic benthic	2.69	SLB	NA	NA	NA	NA	NA	NA	Phe	LMW	Petrogenic	DW	NA	NA	0.1138	0.01707	NA	NA	40	Spring 1999	01/03/1999	Spring	W	Piccardo et al., 2001	2001	1999	4	NA	NA	NA	NA	NA	0.014684932	NA	NA
531	IT	Cornigliano	37.1.3	Tyrrhenian	44.39167	8.87633	1	Bivalvia	Mytiloida	Mytilidae	Mytilus galloprovincialis	Mediterranean mussel	Mytgal	neritic epipelagic benthic	2.69	SLB	NA	NA	NA	NA	NA	NA	Pyr	MMW	Pyrolitic	DW	NA	NA	0.3512	0.05268	NA	NA	40	Spring 1999	01/03/1999	Spring	W	Piccardo et al., 2001	2001	1999	4	0.002581255	0.000387188	NA	NA	NA	0.014684932	0.03	NA
532	IT	Cornigliano	37.1.3	Tyrrhenian	44.39167	8.87633	1	Bivalvia	Mytiloida	Mytilidae	Mytilus galloprovincialis	Mediterranean mussel	Mytgal	neritic epipelagic benthic	2.69	SLB	NA	NA	NA	NA	NA	NA	Pyr	MMW	Pyrolitic	DW	NA	NA	0.2473	0.037095	NA	NA	40	Spring 1999	01/03/1999	Spring	W	Piccardo et al., 2001	2001	1999	4	0.001817609	0.000272641	NA	NA	NA	0.014684932	0.03	NA
533	IT	Cornigliano	37.1.3	Tyrrhenian	44.39167	8.87633	1	Bivalvia	Mytiloida	Mytilidae	Mytilus galloprovincialis	Mediterranean mussel	Mytgal	neritic epipelagic benthic	2.69	SLB	NA	NA	NA	NA	NA	NA	Ant	LMW	Petrogenic	DW	NA	NA	0.0662	0.00993	NA	NA	40	Autumn 1999	01/09/1999	Autumn	W	Piccardo et al., 2001	2001	1999	4	4.86558E-05	7.29837E-06	NA	NA	NA	0.014684932	0.3	NA
534	IT	Cornigliano	37.1.3	Tyrrhenian	44.39167	8.87633	1	Bivalvia	Mytiloida	Mytilidae	Mytilus galloprovincialis	Mediterranean mussel	Mytgal	neritic epipelagic benthic	2.69	SLB	NA	NA	NA	NA	NA	NA	Ant	LMW	Petrogenic	DW	NA	NA	0.0636	0.00954	NA	NA	40	Autumn 1999	01/09/1999	Autumn	W	Piccardo et al., 2001	2001	1999	4	4.67448E-05	7.01172E-06	NA	NA	NA	0.014684932	0.3	NA
535	IT	Cornigliano	37.1.3	Tyrrhenian	44.39167	8.87633	1	Bivalvia	Mytiloida	Mytilidae	Mytilus galloprovincialis	Mediterranean mussel	Mytgal	neritic epipelagic benthic	2.69	SLB	NA	NA	NA	NA	NA	NA	BaA	HMW	Pyrolitic	DW	NA	NA	0.3425	0.051375	NA	NA	40	Autumn 1999	01/09/1999	Autumn	W	Piccardo et al., 2001	2001	1999	4	NA	NA	NA	NA	1.35935E-05	0.014684932	NA	1.2
536	IT	Cornigliano	37.1.3	Tyrrhenian	44.39167	8.87633	1	Bivalvia	Mytiloida	Mytilidae	Mytilus galloprovincialis	Mediterranean mussel	Mytgal	neritic epipelagic benthic	2.69	SLB	NA	NA	NA	NA	NA	NA	BaA	HMW	Pyrolitic	DW	NA	NA	0.2504	0.03756	NA	NA	40	Autumn 1999	01/09/1999	Autumn	W	Piccardo et al., 2001	2001	1999	4	NA	NA	NA	NA	9.93813E-06	0.014684932	NA	1.2
537	IT	Cornigliano	37.1.3	Tyrrhenian	44.39167	8.87633	1	Bivalvia	Mytiloida	Mytilidae	Mytilus galloprovincialis	Mediterranean mussel	Mytgal	neritic epipelagic benthic	2.69	SLB	NA	NA	NA	NA	NA	NA	BaP	HMW	Pyrolitic	DW	NA	NA	0.1569	0.023535	NA	NA	40	Autumn 1999	01/09/1999	Autumn	W	Piccardo et al., 2001	2001	1999	4	0.115318606	0.017297791	NA	NA	1.50491E-05	0.014684932	0.0003	2.9
538	IT	Cornigliano	37.1.3	Tyrrhenian	44.39167	8.87633	1	Bivalvia	Mytiloida	Mytilidae	Mytilus galloprovincialis	Mediterranean mussel	Mytgal	neritic epipelagic benthic	2.69	SLB	NA	NA	NA	NA	NA	NA	BaP	HMW	Pyrolitic	DW	NA	NA	0.0949	0.014235	NA	NA	40	Autumn 1999	01/09/1999	Autumn	W	Piccardo et al., 2001	2001	1999	4	0.06974975	0.010462462	NA	NA	9.10234E-06	0.014684932	0.0003	2.9
539	IT	Cornigliano	37.1.3	Tyrrhenian	44.39167	8.87633	1	Bivalvia	Mytiloida	Mytilidae	Mytilus galloprovincialis	Mediterranean mussel	Mytgal	neritic epipelagic benthic	2.69	SLB	NA	NA	NA	NA	NA	NA	BbF	HMW	Pyrolitic	DW	NA	NA	0.3078	0.04617	NA	NA	40	Autumn 1999	01/09/1999	Autumn	W	Piccardo et al., 2001	2001	1999	4	NA	NA	NA	NA	1.22163E-05	0.014684932	NA	1.2
540	IT	Cornigliano	37.1.3	Tyrrhenian	44.39167	8.87633	1	Bivalvia	Mytiloida	Mytilidae	Mytilus galloprovincialis	Mediterranean mussel	Mytgal	neritic epipelagic benthic	2.69	SLB	NA	NA	NA	NA	NA	NA	BbF	HMW	Pyrolitic	DW	NA	NA	0.1904	0.02856	NA	NA	40	Autumn 1999	01/09/1999	Autumn	W	Piccardo et al., 2001	2001	1999	4	NA	NA	NA	NA	7.55679E-06	0.014684932	NA	1.2
541	IT	Cornigliano	37.1.3	Tyrrhenian	44.39167	8.87633	1	Bivalvia	Mytiloida	Mytilidae	Mytilus galloprovincialis	Mediterranean mussel	Mytgal	neritic epipelagic benthic	2.69	SLB	NA	NA	NA	NA	NA	NA	BghiP	HMW	Pyrolitic	DW	NA	NA	0.1119	0.016785	NA	NA	40	Autumn 1999	01/09/1999	Autumn	W	Piccardo et al., 2001	2001	1999	4	NA	NA	NA	NA	NA	0.014684932	NA	NA
542	IT	Cornigliano	37.1.3	Tyrrhenian	44.39167	8.87633	1	Bivalvia	Mytiloida	Mytilidae	Mytilus galloprovincialis	Mediterranean mussel	Mytgal	neritic epipelagic benthic	2.69	SLB	NA	NA	NA	NA	NA	NA	BghiP	HMW	Pyrolitic	DW	NA	NA	0.056	0.0084	NA	NA	40	Autumn 1999	01/09/1999	Autumn	W	Piccardo et al., 2001	2001	1999	4	NA	NA	NA	NA	NA	0.014684932	NA	NA
543	IT	Cornigliano	37.1.3	Tyrrhenian	44.39167	8.87633	1	Bivalvia	Mytiloida	Mytilidae	Mytilus galloprovincialis	Mediterranean mussel	Mytgal	neritic epipelagic benthic	2.69	SLB	NA	NA	NA	NA	NA	NA	BkF	HMW	Pyrolitic	DW	NA	NA	0.1287	0.019305	NA	NA	40	Autumn 1999	01/09/1999	Autumn	W	Piccardo et al., 2001	2001	1999	4	NA	NA	NA	NA	5.10797E-06	0.014684932	NA	1.2
544	IT	Cornigliano	37.1.3	Tyrrhenian	44.39167	8.87633	1	Bivalvia	Mytiloida	Mytilidae	Mytilus galloprovincialis	Mediterranean mussel	Mytgal	neritic epipelagic benthic	2.69	SLB	NA	NA	NA	NA	NA	NA	BkF	HMW	Pyrolitic	DW	NA	NA	0.0804	0.01206	NA	NA	40	Autumn 1999	01/09/1999	Autumn	W	Piccardo et al., 2001	2001	1999	4	NA	NA	NA	NA	3.191E-06	0.014684932	NA	1.2
545	IT	Cornigliano	37.1.3	Tyrrhenian	44.39167	8.87633	1	Bivalvia	Mytiloida	Mytilidae	Mytilus galloprovincialis	Mediterranean mussel	Mytgal	neritic epipelagic benthic	2.69	SLB	NA	NA	NA	NA	NA	NA	Chr	HMW	Pyrolitic	DW	NA	NA	0.2892	0.04338	NA	NA	40	Autumn 1999	01/09/1999	Autumn	W	Piccardo et al., 2001	2001	1999	4	NA	NA	NA	NA	4.22254E-06	0.014684932	NA	0.441455329
546	IT	Cornigliano	37.1.3	Tyrrhenian	44.39167	8.87633	1	Bivalvia	Mytiloida	Mytilidae	Mytilus galloprovincialis	Mediterranean mussel	Mytgal	neritic epipelagic benthic	2.69	SLB	NA	NA	NA	NA	NA	NA	Chr	HMW	Pyrolitic	DW	NA	NA	0.2049	0.030735	NA	NA	40	Autumn 1999	01/09/1999	Autumn	W	Piccardo et al., 2001	2001	1999	4	NA	NA	NA	NA	2.9917E-06	0.014684932	NA	0.441455329
547	IT	Cornigliano	37.1.3	Tyrrhenian	44.39167	8.87633	1	Bivalvia	Mytiloida	Mytilidae	Mytilus galloprovincialis	Mediterranean mussel	Mytgal	neritic epipelagic benthic	2.69	SLB	NA	NA	NA	NA	NA	NA	DahA	HMW	Pyrolitic	DW	NA	NA	0.0031	0.000465	NA	NA	40	Autumn 1999	01/09/1999	Autumn	W	Piccardo et al., 2001	2001	1999	4	NA	NA	NA	NA	4.20373E-07	0.014684932	NA	4.1
548	IT	Cornigliano	37.1.3	Tyrrhenian	44.39167	8.87633	1	Bivalvia	Mytiloida	Mytilidae	Mytilus galloprovincialis	Mediterranean mussel	Mytgal	neritic epipelagic benthic	2.69	SLB	NA	NA	NA	NA	NA	NA	DahA	HMW	Pyrolitic	DW	NA	NA	0.0009	0.000135	NA	NA	40	Autumn 1999	01/09/1999	Autumn	W	Piccardo et al., 2001	2001	1999	4	NA	NA	NA	NA	1.22044E-07	0.014684932	NA	4.1
549	IT	Cornigliano	37.1.3	Tyrrhenian	44.39167	8.87633	1	Bivalvia	Mytiloida	Mytilidae	Mytilus galloprovincialis	Mediterranean mussel	Mytgal	neritic epipelagic benthic	2.69	SLB	NA	NA	NA	NA	NA	NA	Flu	MMW	Pyrolitic	DW	NA	NA	0.6706	0.10059	NA	NA	40	Autumn 1999	01/09/1999	Autumn	W	Piccardo et al., 2001	2001	1999	4	0.00369659	0.000554488	NA	NA	NA	0.014684932	0.04	NA
550	IT	Cornigliano	37.1.3	Tyrrhenian	44.39167	8.87633	1	Bivalvia	Mytiloida	Mytilidae	Mytilus galloprovincialis	Mediterranean mussel	Mytgal	neritic epipelagic benthic	2.69	SLB	NA	NA	NA	NA	NA	NA	Flu	MMW	Pyrolitic	DW	NA	NA	0.5603	0.084045	NA	NA	40	Autumn 1999	01/09/1999	Autumn	W	Piccardo et al., 2001	2001	1999	4	0.003088576	0.000463286	NA	NA	NA	0.014684932	0.04	NA
551	IT	Cornigliano	37.1.3	Tyrrhenian	44.39167	8.87633	1	Bivalvia	Mytiloida	Mytilidae	Mytilus galloprovincialis	Mediterranean mussel	Mytgal	neritic epipelagic benthic	2.69	SLB	NA	NA	NA	NA	NA	NA	Phe	LMW	Petrogenic	DW	NA	NA	0.2085	0.031275	NA	NA	40	Autumn 1999	01/09/1999	Autumn	W	Piccardo et al., 2001	2001	1999	4	NA	NA	NA	NA	NA	0.014684932	NA	NA
552	IT	Cornigliano	37.1.3	Tyrrhenian	44.39167	8.87633	1	Bivalvia	Mytiloida	Mytilidae	Mytilus galloprovincialis	Mediterranean mussel	Mytgal	neritic epipelagic benthic	2.69	SLB	NA	NA	NA	NA	NA	NA	Phe	LMW	Petrogenic	DW	NA	NA	0.1455	0.021825	NA	NA	40	Autumn 1999	01/09/1999	Autumn	W	Piccardo et al., 2001	2001	1999	4	NA	NA	NA	NA	NA	0.014684932	NA	NA
553	IT	Cornigliano	37.1.3	Tyrrhenian	44.39167	8.87633	1	Bivalvia	Mytiloida	Mytilidae	Mytilus galloprovincialis	Mediterranean mussel	Mytgal	neritic epipelagic benthic	2.69	SLB	NA	NA	NA	NA	NA	NA	Pyr	MMW	Pyrolitic	DW	NA	NA	0.4202	0.06303	NA	NA	40	Autumn 1999	01/09/1999	Autumn	W	Piccardo et al., 2001	2001	1999	4	0.003088393	0.000463259	NA	NA	NA	0.014684932	0.03	NA
554	IT	Cornigliano	37.1.3	Tyrrhenian	44.39167	8.87633	1	Bivalvia	Mytiloida	Mytilidae	Mytilus galloprovincialis	Mediterranean mussel	Mytgal	neritic epipelagic benthic	2.69	SLB	NA	NA	NA	NA	NA	NA	Pyr	MMW	Pyrolitic	DW	NA	NA	0.2738	0.04107	NA	NA	40	Autumn 1999	01/09/1999	Autumn	W	Piccardo et al., 2001	2001	1999	4	0.00201238	0.000301857	NA	NA	NA	0.014684932	0.03	NA
555	IT	Palmaria	37.1.3	Tyrrhenian	44.03881	9.85285	2	Bivalvia	Mytiloida	Mytilidae	Mytilus galloprovincialis	Mediterranean mussel	Mytgal	neritic epipelagic benthic	2.69	SLB	NA	NA	NA	NA	NA	NA	Ant	LMW	Petrogenic	DW	NA	NA	0.0003	0.000045	NA	NA	40	Spring 1999	01/03/1999	Spring	F	Piccardo et al., 2001	2001	1999	4	2.20494E-07	3.30742E-08	NA	NA	NA	0.014684932	0.3	NA
556	IT	Palmaria	37.1.3	Tyrrhenian	44.03881	9.85285	2	Bivalvia	Mytiloida	Mytilidae	Mytilus galloprovincialis	Mediterranean mussel	Mytgal	neritic epipelagic benthic	2.69	SLB	NA	NA	NA	NA	NA	NA	BaA	HMW	Pyrolitic	DW	NA	NA	0.00002	0.000003	NA	NA	40	Spring 1999	01/03/1999	Spring	F	Piccardo et al., 2001	2001	1999	4	NA	NA	NA	NA	7.9378E-10	0.014684932	NA	1.2
557	IT	Palmaria	37.1.3	Tyrrhenian	44.03881	9.85285	2	Bivalvia	Mytiloida	Mytilidae	Mytilus galloprovincialis	Mediterranean mussel	Mytgal	neritic epipelagic benthic	2.69	SLB	NA	NA	NA	NA	NA	NA	BaP	HMW	Pyrolitic	DW	NA	NA	0.0002	0.00003	NA	NA	40	Spring 1999	01/03/1999	Spring	F	Piccardo et al., 2001	2001	1999	4	0.000146996	2.20494E-05	NA	NA	1.9183E-08	0.014684932	0.0003	2.9
558	IT	Palmaria	37.1.3	Tyrrhenian	44.03881	9.85285	2	Bivalvia	Mytiloida	Mytilidae	Mytilus galloprovincialis	Mediterranean mussel	Mytgal	neritic epipelagic benthic	2.69	SLB	NA	NA	NA	NA	NA	NA	BbF	HMW	Pyrolitic	DW	NA	NA	0.0016	0.00024	NA	NA	40	Spring 1999	01/03/1999	Spring	F	Piccardo et al., 2001	2001	1999	4	NA	NA	NA	NA	6.35024E-08	0.014684932	NA	1.2
559	IT	Palmaria	37.1.3	Tyrrhenian	44.03881	9.85285	2	Bivalvia	Mytiloida	Mytilidae	Mytilus galloprovincialis	Mediterranean mussel	Mytgal	neritic epipelagic benthic	2.69	SLB	NA	NA	NA	NA	NA	NA	BghiP	HMW	Pyrolitic	DW	NA	NA	0.0019	0.000285	NA	NA	40	Spring 1999	01/03/1999	Spring	F	Piccardo et al., 2001	2001	1999	4	NA	NA	NA	NA	NA	0.014684932	NA	NA
560	IT	Palmaria	37.1.3	Tyrrhenian	44.03881	9.85285	2	Bivalvia	Mytiloida	Mytilidae	Mytilus galloprovincialis	Mediterranean mussel	Mytgal	neritic epipelagic benthic	2.69	SLB	NA	NA	NA	NA	NA	NA	BkF	HMW	Pyrolitic	DW	NA	NA	0.0012	0.00018	NA	NA	40	Spring 1999	01/03/1999	Spring	F	Piccardo et al., 2001	2001	1999	4	NA	NA	NA	NA	4.76268E-08	0.014684932	NA	1.2
561	IT	Palmaria	37.1.3	Tyrrhenian	44.03881	9.85285	2	Bivalvia	Mytiloida	Mytilidae	Mytilus galloprovincialis	Mediterranean mussel	Mytgal	neritic epipelagic benthic	2.69	SLB	NA	NA	NA	NA	NA	NA	Chr	HMW	Pyrolitic	DW	NA	NA	0.0002	0.00003	NA	NA	40	Spring 1999	01/03/1999	Spring	F	Piccardo et al., 2001	2001	1999	4	NA	NA	NA	NA	2.92015E-09	0.014684932	NA	0.441455329
562	IT	Palmaria	37.1.3	Tyrrhenian	44.03881	9.85285	2	Bivalvia	Mytiloida	Mytilidae	Mytilus galloprovincialis	Mediterranean mussel	Mytgal	neritic epipelagic benthic	2.69	SLB	NA	NA	NA	NA	NA	NA	DahA	HMW	Pyrolitic	DW	NA	NA	0.0003	0.000045	NA	NA	40	Spring 1999	01/03/1999	Spring	F	Piccardo et al., 2001	2001	1999	4	NA	NA	NA	NA	4.06812E-08	0.014684932	NA	4.1
563	IT	Palmaria	37.1.3	Tyrrhenian	44.03881	9.85285	2	Bivalvia	Mytiloida	Mytilidae	Mytilus galloprovincialis	Mediterranean mussel	Mytgal	neritic epipelagic benthic	2.69	SLB	NA	NA	NA	NA	NA	NA	Flu	MMW	Pyrolitic	DW	NA	NA	0.0538	0.00807	NA	NA	40	Spring 1999	01/03/1999	Spring	F	Piccardo et al., 2001	2001	1999	4	0.000296565	4.44848E-05	NA	NA	NA	0.014684932	0.04	NA
564	IT	Palmaria	37.1.3	Tyrrhenian	44.03881	9.85285	2	Bivalvia	Mytiloida	Mytilidae	Mytilus galloprovincialis	Mediterranean mussel	Mytgal	neritic epipelagic benthic	2.69	SLB	NA	NA	NA	NA	NA	NA	Phe	LMW	Petrogenic	DW	NA	NA	0.0174	0.00261	NA	NA	40	Spring 1999	01/03/1999	Spring	F	Piccardo et al., 2001	2001	1999	4	NA	NA	NA	NA	NA	0.014684932	NA	NA
565	IT	Palmaria	37.1.3	Tyrrhenian	44.03881	9.85285	2	Bivalvia	Mytiloida	Mytilidae	Mytilus galloprovincialis	Mediterranean mussel	Mytgal	neritic epipelagic benthic	2.69	SLB	NA	NA	NA	NA	NA	NA	Pyr	MMW	Pyrolitic	DW	NA	NA	0.0115	0.001725	NA	NA	40	Spring 1999	01/03/1999	Spring	F	Piccardo et al., 2001	2001	1999	4	8.45229E-05	1.26784E-05	NA	NA	NA	0.014684932	0.03	NA
566	IT	Palmaria	37.1.3	Tyrrhenian	44.03881	9.85285	2	Bivalvia	Mytiloida	Mytilidae	Mytilus galloprovincialis	Mediterranean mussel	Mytgal	neritic epipelagic benthic	2.69	SLB	NA	NA	NA	NA	NA	NA	Ant	LMW	Petrogenic	DW	NA	NA	0.0009	0.000135	NA	NA	40	Autumn 1999	01/09/1999	Autumn	F	Piccardo et al., 2001	2001	1999	4	6.61483E-07	9.92225E-08	NA	NA	NA	0.014684932	0.3	NA
567	IT	Palmaria	37.1.3	Tyrrhenian	44.03881	9.85285	2	Bivalvia	Mytiloida	Mytilidae	Mytilus galloprovincialis	Mediterranean mussel	Mytgal	neritic epipelagic benthic	2.69	SLB	NA	NA	NA	NA	NA	NA	BaA	HMW	Pyrolitic	DW	NA	NA	0.0037	0.000555	NA	NA	40	Autumn 1999	01/09/1999	Autumn	F	Piccardo et al., 2001	2001	1999	4	NA	NA	NA	NA	1.46849E-07	0.014684932	NA	1.2
568	IT	Palmaria	37.1.3	Tyrrhenian	44.03881	9.85285	2	Bivalvia	Mytiloida	Mytilidae	Mytilus galloprovincialis	Mediterranean mussel	Mytgal	neritic epipelagic benthic	2.69	SLB	NA	NA	NA	NA	NA	NA	BaP	HMW	Pyrolitic	DW	NA	NA	0.0028	0.00042	NA	NA	40	Autumn 1999	01/09/1999	Autumn	F	Piccardo et al., 2001	2001	1999	4	0.002057948	0.000308692	NA	NA	2.68562E-07	0.014684932	0.0003	2.9
569	IT	Palmaria	37.1.3	Tyrrhenian	44.03881	9.85285	2	Bivalvia	Mytiloida	Mytilidae	Mytilus galloprovincialis	Mediterranean mussel	Mytgal	neritic epipelagic benthic	2.69	SLB	NA	NA	NA	NA	NA	NA	BbF	HMW	Pyrolitic	DW	NA	NA	0.0107	0.001605	NA	NA	40	Autumn 1999	01/09/1999	Autumn	F	Piccardo et al., 2001	2001	1999	4	NA	NA	NA	NA	4.24672E-07	0.014684932	NA	1.2
570	IT	Palmaria	37.1.3	Tyrrhenian	44.03881	9.85285	2	Bivalvia	Mytiloida	Mytilidae	Mytilus galloprovincialis	Mediterranean mussel	Mytgal	neritic epipelagic benthic	2.69	SLB	NA	NA	NA	NA	NA	NA	BghiP	HMW	Pyrolitic	DW	NA	NA	0.0085	0.001275	NA	NA	40	Autumn 1999	01/09/1999	Autumn	F	Piccardo et al., 2001	2001	1999	4	NA	NA	NA	NA	NA	0.014684932	NA	NA
571	IT	Palmaria	37.1.3	Tyrrhenian	44.03881	9.85285	2	Bivalvia	Mytiloida	Mytilidae	Mytilus galloprovincialis	Mediterranean mussel	Mytgal	neritic epipelagic benthic	2.69	SLB	NA	NA	NA	NA	NA	NA	BkF	HMW	Pyrolitic	DW	NA	NA	0.0036	0.00054	NA	NA	40	Autumn 1999	01/09/1999	Autumn	F	Piccardo et al., 2001	2001	1999	4	NA	NA	NA	NA	1.4288E-07	0.014684932	NA	1.2
572	IT	Palmaria	37.1.3	Tyrrhenian	44.03881	9.85285	2	Bivalvia	Mytiloida	Mytilidae	Mytilus galloprovincialis	Mediterranean mussel	Mytgal	neritic epipelagic benthic	2.69	SLB	NA	NA	NA	NA	NA	NA	Chr	HMW	Pyrolitic	DW	NA	NA	0.0002	0.00003	NA	NA	40	Autumn 1999	01/09/1999	Autumn	F	Piccardo et al., 2001	2001	1999	4	NA	NA	NA	NA	2.92015E-09	0.014684932	NA	0.441455329
573	IT	Palmaria	37.1.3	Tyrrhenian	44.03881	9.85285	2	Bivalvia	Mytiloida	Mytilidae	Mytilus galloprovincialis	Mediterranean mussel	Mytgal	neritic epipelagic benthic	2.69	SLB	NA	NA	NA	NA	NA	NA	DahA	HMW	Pyrolitic	DW	NA	NA	0.00002	0.000003	NA	NA	40	Autumn 1999	01/09/1999	Autumn	F	Piccardo et al., 2001	2001	1999	4	NA	NA	NA	NA	2.71208E-09	0.014684932	NA	4.1
574	IT	Palmaria	37.1.3	Tyrrhenian	44.03881	9.85285	2	Bivalvia	Mytiloida	Mytilidae	Mytilus galloprovincialis	Mediterranean mussel	Mytgal	neritic epipelagic benthic	2.69	SLB	NA	NA	NA	NA	NA	NA	Flu	MMW	Pyrolitic	DW	NA	NA	0.0138	0.00207	NA	NA	40	Autumn 1999	01/09/1999	Autumn	F	Piccardo et al., 2001	2001	1999	4	7.60706E-05	1.14106E-05	NA	NA	NA	0.014684932	0.04	NA
575	IT	Palmaria	37.1.3	Tyrrhenian	44.03881	9.85285	2	Bivalvia	Mytiloida	Mytilidae	Mytilus galloprovincialis	Mediterranean mussel	Mytgal	neritic epipelagic benthic	2.69	SLB	NA	NA	NA	NA	NA	NA	Phe	LMW	Petrogenic	DW	NA	NA	0.0034	0.00051	NA	NA	40	Autumn 1999	01/09/1999	Autumn	F	Piccardo et al., 2001	2001	1999	4	NA	NA	NA	NA	NA	0.014684932	NA	NA
576	IT	Palmaria	37.1.3	Tyrrhenian	44.03881	9.85285	2	Bivalvia	Mytiloida	Mytilidae	Mytilus galloprovincialis	Mediterranean mussel	Mytgal	neritic epipelagic benthic	2.69	SLB	NA	NA	NA	NA	NA	NA	Pyr	MMW	Pyrolitic	DW	NA	NA	0.0104	0.00156	NA	NA	40	Autumn 1999	01/09/1999	Autumn	F	Piccardo et al., 2001	2001	1999	4	7.64381E-05	1.14657E-05	NA	NA	NA	0.014684932	0.03	NA
577	IT	Sanremo	37.1.3	Tyrrhenian	43.80833	7.78683	1	Bivalvia	Mytiloida	Mytilidae	Mytilus galloprovincialis	Mediterranean mussel	Mytgal	neritic epipelagic benthic	2.69	SLB	NA	NA	NA	NA	NA	NA	Ant	LMW	Petrogenic	DW	NA	NA	0.0001	0.000015	NA	NA	40	Spring 1999	01/03/1999	Spring	W	Piccardo et al., 2001	2001	1999	4	7.34982E-08	1.10247E-08	NA	NA	NA	0.014684932	0.3	NA
578	IT	Sanremo	37.1.3	Tyrrhenian	43.80833	7.78683	1	Bivalvia	Mytiloida	Mytilidae	Mytilus galloprovincialis	Mediterranean mussel	Mytgal	neritic epipelagic benthic	2.69	SLB	NA	NA	NA	NA	NA	NA	Ant	LMW	Petrogenic	DW	NA	NA	0.00002	0.000003	NA	NA	40	Spring 1999	01/03/1999	Spring	W	Piccardo et al., 2001	2001	1999	4	1.46996E-08	2.20494E-09	NA	NA	NA	0.014684932	0.3	NA
579	IT	Sanremo	37.1.3	Tyrrhenian	43.80833	7.78683	1	Bivalvia	Mytiloida	Mytilidae	Mytilus galloprovincialis	Mediterranean mussel	Mytgal	neritic epipelagic benthic	2.69	SLB	NA	NA	NA	NA	NA	NA	BaA	HMW	Pyrolitic	DW	NA	NA	0.0057	0.000855	NA	NA	40	Spring 1999	01/03/1999	Spring	W	Piccardo et al., 2001	2001	1999	4	NA	NA	NA	NA	2.26227E-07	0.014684932	NA	1.2
580	IT	Sanremo	37.1.3	Tyrrhenian	43.80833	7.78683	1	Bivalvia	Mytiloida	Mytilidae	Mytilus galloprovincialis	Mediterranean mussel	Mytgal	neritic epipelagic benthic	2.69	SLB	NA	NA	NA	NA	NA	NA	BaA	HMW	Pyrolitic	DW	NA	NA	0.0022	0.00033	NA	NA	40	Spring 1999	01/03/1999	Spring	W	Piccardo et al., 2001	2001	1999	4	NA	NA	NA	NA	8.73158E-08	0.014684932	NA	1.2
581	IT	Sanremo	37.1.3	Tyrrhenian	43.80833	7.78683	1	Bivalvia	Mytiloida	Mytilidae	Mytilus galloprovincialis	Mediterranean mussel	Mytgal	neritic epipelagic benthic	2.69	SLB	NA	NA	NA	NA	NA	NA	BaP	HMW	Pyrolitic	DW	NA	NA	0.007	0.00105	NA	NA	40	Spring 1999	01/03/1999	Spring	W	Piccardo et al., 2001	2001	1999	4	0.005144871	0.000771731	NA	NA	6.71406E-07	0.014684932	0.0003	2.9
582	IT	Sanremo	37.1.3	Tyrrhenian	43.80833	7.78683	1	Bivalvia	Mytiloida	Mytilidae	Mytilus galloprovincialis	Mediterranean mussel	Mytgal	neritic epipelagic benthic	2.69	SLB	NA	NA	NA	NA	NA	NA	BaP	HMW	Pyrolitic	DW	NA	NA	0.0057	0.000855	NA	NA	40	Spring 1999	01/03/1999	Spring	W	Piccardo et al., 2001	2001	1999	4	0.004189395	0.000628409	NA	NA	5.46716E-07	0.014684932	0.0003	2.9
583	IT	Sanremo	37.1.3	Tyrrhenian	43.80833	7.78683	1	Bivalvia	Mytiloida	Mytilidae	Mytilus galloprovincialis	Mediterranean mussel	Mytgal	neritic epipelagic benthic	2.69	SLB	NA	NA	NA	NA	NA	NA	BbF	HMW	Pyrolitic	DW	NA	NA	0.0142	0.00213	NA	NA	40	Spring 1999	01/03/1999	Spring	W	Piccardo et al., 2001	2001	1999	4	NA	NA	NA	NA	5.63584E-07	0.014684932	NA	1.2
584	IT	Sanremo	37.1.3	Tyrrhenian	43.80833	7.78683	1	Bivalvia	Mytiloida	Mytilidae	Mytilus galloprovincialis	Mediterranean mussel	Mytgal	neritic epipelagic benthic	2.69	SLB	NA	NA	NA	NA	NA	NA	BbF	HMW	Pyrolitic	DW	NA	NA	0.0123	0.001845	NA	NA	40	Spring 1999	01/03/1999	Spring	W	Piccardo et al., 2001	2001	1999	4	NA	NA	NA	NA	4.88175E-07	0.014684932	NA	1.2
585	IT	Sanremo	37.1.3	Tyrrhenian	43.80833	7.78683	1	Bivalvia	Mytiloida	Mytilidae	Mytilus galloprovincialis	Mediterranean mussel	Mytgal	neritic epipelagic benthic	2.69	SLB	NA	NA	NA	NA	NA	NA	BghiP	HMW	Pyrolitic	DW	NA	NA	0.0118	0.00177	NA	NA	40	Spring 1999	01/03/1999	Spring	W	Piccardo et al., 2001	2001	1999	4	NA	NA	NA	NA	NA	0.014684932	NA	NA
586	IT	Sanremo	37.1.3	Tyrrhenian	43.80833	7.78683	1	Bivalvia	Mytiloida	Mytilidae	Mytilus galloprovincialis	Mediterranean mussel	Mytgal	neritic epipelagic benthic	2.69	SLB	NA	NA	NA	NA	NA	NA	BghiP	HMW	Pyrolitic	DW	NA	NA	0.0101	0.001515	NA	NA	40	Spring 1999	01/03/1999	Spring	W	Piccardo et al., 2001	2001	1999	4	NA	NA	NA	NA	NA	0.014684932	NA	NA
587	IT	Sanremo	37.1.3	Tyrrhenian	43.80833	7.78683	1	Bivalvia	Mytiloida	Mytilidae	Mytilus galloprovincialis	Mediterranean mussel	Mytgal	neritic epipelagic benthic	2.69	SLB	NA	NA	NA	NA	NA	NA	BkF	HMW	Pyrolitic	DW	NA	NA	0.0266	0.00399	NA	NA	40	Spring 1999	01/03/1999	Spring	W	Piccardo et al., 2001	2001	1999	4	NA	NA	NA	NA	1.05573E-06	0.014684932	NA	1.2
588	IT	Sanremo	37.1.3	Tyrrhenian	43.80833	7.78683	1	Bivalvia	Mytiloida	Mytilidae	Mytilus galloprovincialis	Mediterranean mussel	Mytgal	neritic epipelagic benthic	2.69	SLB	NA	NA	NA	NA	NA	NA	BkF	HMW	Pyrolitic	DW	NA	NA	0.0094	0.00141	NA	NA	40	Spring 1999	01/03/1999	Spring	W	Piccardo et al., 2001	2001	1999	4	NA	NA	NA	NA	3.73077E-07	0.014684932	NA	1.2
589	IT	Sanremo	37.1.3	Tyrrhenian	43.80833	7.78683	1	Bivalvia	Mytiloida	Mytilidae	Mytilus galloprovincialis	Mediterranean mussel	Mytgal	neritic epipelagic benthic	2.69	SLB	NA	NA	NA	NA	NA	NA	Chr	HMW	Pyrolitic	DW	NA	NA	0.2285	0.034275	NA	NA	40	Spring 1999	01/03/1999	Spring	W	Piccardo et al., 2001	2001	1999	4	NA	NA	NA	NA	3.33628E-06	0.014684932	NA	0.441455329
590	IT	Sanremo	37.1.3	Tyrrhenian	43.80833	7.78683	1	Bivalvia	Mytiloida	Mytilidae	Mytilus galloprovincialis	Mediterranean mussel	Mytgal	neritic epipelagic benthic	2.69	SLB	NA	NA	NA	NA	NA	NA	Chr	HMW	Pyrolitic	DW	NA	NA	0.0248	0.00372	NA	NA	40	Spring 1999	01/03/1999	Spring	W	Piccardo et al., 2001	2001	1999	4	NA	NA	NA	NA	3.62099E-07	0.014684932	NA	0.441455329
591	IT	Sanremo	37.1.3	Tyrrhenian	43.80833	7.78683	1	Bivalvia	Mytiloida	Mytilidae	Mytilus galloprovincialis	Mediterranean mussel	Mytgal	neritic epipelagic benthic	2.69	SLB	NA	NA	NA	NA	NA	NA	DahA	HMW	Pyrolitic	DW	NA	NA	0.0198	0.00297	NA	NA	40	Spring 1999	01/03/1999	Spring	W	Piccardo et al., 2001	2001	1999	4	NA	NA	NA	NA	2.68496E-06	0.014684932	NA	4.1
592	IT	Sanremo	37.1.3	Tyrrhenian	43.80833	7.78683	1	Bivalvia	Mytiloida	Mytilidae	Mytilus galloprovincialis	Mediterranean mussel	Mytgal	neritic epipelagic benthic	2.69	SLB	NA	NA	NA	NA	NA	NA	DahA	HMW	Pyrolitic	DW	NA	NA	0.0019	0.000285	NA	NA	40	Spring 1999	01/03/1999	Spring	W	Piccardo et al., 2001	2001	1999	4	NA	NA	NA	NA	2.57648E-07	0.014684932	NA	4.1
593	IT	Sanremo	37.1.3	Tyrrhenian	43.80833	7.78683	1	Bivalvia	Mytiloida	Mytilidae	Mytilus galloprovincialis	Mediterranean mussel	Mytgal	neritic epipelagic benthic	2.69	SLB	NA	NA	NA	NA	NA	NA	Flu	MMW	Pyrolitic	DW	NA	NA	0.5022	0.07533	NA	NA	40	Spring 1999	01/03/1999	Spring	W	Piccardo et al., 2001	2001	1999	4	0.002768308	0.000415246	NA	NA	NA	0.014684932	0.04	NA
594	IT	Sanremo	37.1.3	Tyrrhenian	43.80833	7.78683	1	Bivalvia	Mytiloida	Mytilidae	Mytilus galloprovincialis	Mediterranean mussel	Mytgal	neritic epipelagic benthic	2.69	SLB	NA	NA	NA	NA	NA	NA	Flu	MMW	Pyrolitic	DW	NA	NA	0.0454	0.00681	NA	NA	40	Spring 1999	01/03/1999	Spring	W	Piccardo et al., 2001	2001	1999	4	0.000250261	3.75392E-05	NA	NA	NA	0.014684932	0.04	NA
595	IT	Sanremo	37.1.3	Tyrrhenian	43.80833	7.78683	1	Bivalvia	Mytiloida	Mytilidae	Mytilus galloprovincialis	Mediterranean mussel	Mytgal	neritic epipelagic benthic	2.69	SLB	NA	NA	NA	NA	NA	NA	Phe	LMW	Petrogenic	DW	NA	NA	0.1112	0.01668	NA	NA	40	Spring 1999	01/03/1999	Spring	W	Piccardo et al., 2001	2001	1999	4	NA	NA	NA	NA	NA	0.014684932	NA	NA
596	IT	Sanremo	37.1.3	Tyrrhenian	43.80833	7.78683	1	Bivalvia	Mytiloida	Mytilidae	Mytilus galloprovincialis	Mediterranean mussel	Mytgal	neritic epipelagic benthic	2.69	SLB	NA	NA	NA	NA	NA	NA	Phe	LMW	Petrogenic	DW	NA	NA	0.0192	0.00288	NA	NA	40	Spring 1999	01/03/1999	Spring	W	Piccardo et al., 2001	2001	1999	4	NA	NA	NA	NA	NA	0.014684932	NA	NA
597	IT	Sanremo	37.1.3	Tyrrhenian	43.80833	7.78683	1	Bivalvia	Mytiloida	Mytilidae	Mytilus galloprovincialis	Mediterranean mussel	Mytgal	neritic epipelagic benthic	2.69	SLB	NA	NA	NA	NA	NA	NA	Pyr	MMW	Pyrolitic	DW	NA	NA	0.2037	0.030555	NA	NA	40	Spring 1999	01/03/1999	Spring	W	Piccardo et al., 2001	2001	1999	4	0.001497157	0.000224574	NA	NA	NA	0.014684932	0.03	NA
598	IT	Sanremo	37.1.3	Tyrrhenian	43.80833	7.78683	1	Bivalvia	Mytiloida	Mytilidae	Mytilus galloprovincialis	Mediterranean mussel	Mytgal	neritic epipelagic benthic	2.69	SLB	NA	NA	NA	NA	NA	NA	Pyr	MMW	Pyrolitic	DW	NA	NA	0.0076	0.00114	NA	NA	40	Spring 1999	01/03/1999	Spring	W	Piccardo et al., 2001	2001	1999	4	5.58586E-05	8.37879E-06	NA	NA	NA	0.014684932	0.03	NA
599	IT	Sanremo	37.1.3	Tyrrhenian	43.80833	7.78683	1	Bivalvia	Mytiloida	Mytilidae	Mytilus galloprovincialis	Mediterranean mussel	Mytgal	neritic epipelagic benthic	2.69	SLB	NA	NA	NA	NA	NA	NA	Ant	LMW	Petrogenic	DW	NA	NA	0.03	0.0045	NA	NA	40	Autumn 1999	01/09/1999	Autumn	W	Piccardo et al., 2001	2001	1999	4	2.20494E-05	3.30742E-06	NA	NA	NA	0.014684932	0.3	NA
600	IT	Sanremo	37.1.3	Tyrrhenian	43.80833	7.78683	1	Bivalvia	Mytiloida	Mytilidae	Mytilus galloprovincialis	Mediterranean mussel	Mytgal	neritic epipelagic benthic	2.69	SLB	NA	NA	NA	NA	NA	NA	Ant	LMW	Petrogenic	DW	NA	NA	0.0043	0.000645	NA	NA	40	Autumn 1999	01/09/1999	Autumn	W	Piccardo et al., 2001	2001	1999	4	3.16042E-06	4.74063E-07	NA	NA	NA	0.014684932	0.3	NA
601	IT	Sanremo	37.1.3	Tyrrhenian	43.80833	7.78683	1	Bivalvia	Mytiloida	Mytilidae	Mytilus galloprovincialis	Mediterranean mussel	Mytgal	neritic epipelagic benthic	2.69	SLB	NA	NA	NA	NA	NA	NA	BaA	HMW	Pyrolitic	DW	NA	NA	0.0378	0.00567	NA	NA	40	Autumn 1999	01/09/1999	Autumn	W	Piccardo et al., 2001	2001	1999	4	NA	NA	NA	NA	1.50024E-06	0.014684932	NA	1.2
602	IT	Sanremo	37.1.3	Tyrrhenian	43.80833	7.78683	1	Bivalvia	Mytiloida	Mytilidae	Mytilus galloprovincialis	Mediterranean mussel	Mytgal	neritic epipelagic benthic	2.69	SLB	NA	NA	NA	NA	NA	NA	BaA	HMW	Pyrolitic	DW	NA	NA	0.007	0.00105	NA	NA	40	Autumn 1999	01/09/1999	Autumn	W	Piccardo et al., 2001	2001	1999	4	NA	NA	NA	NA	2.77823E-07	0.014684932	NA	1.2
603	IT	Sanremo	37.1.3	Tyrrhenian	43.80833	7.78683	1	Bivalvia	Mytiloida	Mytilidae	Mytilus galloprovincialis	Mediterranean mussel	Mytgal	neritic epipelagic benthic	2.69	SLB	NA	NA	NA	NA	NA	NA	BaP	HMW	Pyrolitic	DW	NA	NA	0.0296	0.00444	NA	NA	40	Autumn 1999	01/09/1999	Autumn	W	Piccardo et al., 2001	2001	1999	4	0.021755454	0.003263318	NA	NA	2.83909E-06	0.014684932	0.0003	2.9
604	IT	Sanremo	37.1.3	Tyrrhenian	43.80833	7.78683	1	Bivalvia	Mytiloida	Mytilidae	Mytilus galloprovincialis	Mediterranean mussel	Mytgal	neritic epipelagic benthic	2.69	SLB	NA	NA	NA	NA	NA	NA	BaP	HMW	Pyrolitic	DW	NA	NA	0.0096	0.00144	NA	NA	40	Autumn 1999	01/09/1999	Autumn	W	Piccardo et al., 2001	2001	1999	4	0.007055823	0.001058373	NA	NA	9.20785E-07	0.014684932	0.0003	2.9
605	IT	Sanremo	37.1.3	Tyrrhenian	43.80833	7.78683	1	Bivalvia	Mytiloida	Mytilidae	Mytilus galloprovincialis	Mediterranean mussel	Mytgal	neritic epipelagic benthic	2.69	SLB	NA	NA	NA	NA	NA	NA	BbF	HMW	Pyrolitic	DW	NA	NA	0.1019	0.015285	NA	NA	40	Autumn 1999	01/09/1999	Autumn	W	Piccardo et al., 2001	2001	1999	4	NA	NA	NA	NA	4.04431E-06	0.014684932	NA	1.2
606	IT	Sanremo	37.1.3	Tyrrhenian	43.80833	7.78683	1	Bivalvia	Mytiloida	Mytilidae	Mytilus galloprovincialis	Mediterranean mussel	Mytgal	neritic epipelagic benthic	2.69	SLB	NA	NA	NA	NA	NA	NA	BbF	HMW	Pyrolitic	DW	NA	NA	0.0502	0.00753	NA	NA	40	Autumn 1999	01/09/1999	Autumn	W	Piccardo et al., 2001	2001	1999	4	NA	NA	NA	NA	1.99239E-06	0.014684932	NA	1.2
607	IT	Sanremo	37.1.3	Tyrrhenian	43.80833	7.78683	1	Bivalvia	Mytiloida	Mytilidae	Mytilus galloprovincialis	Mediterranean mussel	Mytgal	neritic epipelagic benthic	2.69	SLB	NA	NA	NA	NA	NA	NA	BghiP	HMW	Pyrolitic	DW	NA	NA	0.0975	0.014625	NA	NA	40	Autumn 1999	01/09/1999	Autumn	W	Piccardo et al., 2001	2001	1999	4	NA	NA	NA	NA	NA	0.014684932	NA	NA
608	IT	Sanremo	37.1.3	Tyrrhenian	43.80833	7.78683	1	Bivalvia	Mytiloida	Mytilidae	Mytilus galloprovincialis	Mediterranean mussel	Mytgal	neritic epipelagic benthic	2.69	SLB	NA	NA	NA	NA	NA	NA	BghiP	HMW	Pyrolitic	DW	NA	NA	0.0262	0.00393	NA	NA	40	Autumn 1999	01/09/1999	Autumn	W	Piccardo et al., 2001	2001	1999	4	NA	NA	NA	NA	NA	0.014684932	NA	NA
609	IT	Sanremo	37.1.3	Tyrrhenian	43.80833	7.78683	1	Bivalvia	Mytiloida	Mytilidae	Mytilus galloprovincialis	Mediterranean mussel	Mytgal	neritic epipelagic benthic	2.69	SLB	NA	NA	NA	NA	NA	NA	BkF	HMW	Pyrolitic	DW	NA	NA	0.0387	0.005805	NA	NA	40	Autumn 1999	01/09/1999	Autumn	W	Piccardo et al., 2001	2001	1999	4	NA	NA	NA	NA	1.53596E-06	0.014684932	NA	1.2
610	IT	Sanremo	37.1.3	Tyrrhenian	43.80833	7.78683	1	Bivalvia	Mytiloida	Mytilidae	Mytilus galloprovincialis	Mediterranean mussel	Mytgal	neritic epipelagic benthic	2.69	SLB	NA	NA	NA	NA	NA	NA	BkF	HMW	Pyrolitic	DW	NA	NA	0.0115	0.001725	NA	NA	40	Autumn 1999	01/09/1999	Autumn	W	Piccardo et al., 2001	2001	1999	4	NA	NA	NA	NA	4.56424E-07	0.014684932	NA	1.2
611	IT	Sanremo	37.1.3	Tyrrhenian	43.80833	7.78683	1	Bivalvia	Mytiloida	Mytilidae	Mytilus galloprovincialis	Mediterranean mussel	Mytgal	neritic epipelagic benthic	2.69	SLB	NA	NA	NA	NA	NA	NA	Chr	HMW	Pyrolitic	DW	NA	NA	0.2616	0.03924	NA	NA	40	Autumn 1999	01/09/1999	Autumn	W	Piccardo et al., 2001	2001	1999	4	NA	NA	NA	NA	3.81956E-06	0.014684932	NA	0.441455329
612	IT	Sanremo	37.1.3	Tyrrhenian	43.80833	7.78683	1	Bivalvia	Mytiloida	Mytilidae	Mytilus galloprovincialis	Mediterranean mussel	Mytgal	neritic epipelagic benthic	2.69	SLB	NA	NA	NA	NA	NA	NA	Chr	HMW	Pyrolitic	DW	NA	NA	0.0274	0.00411	NA	NA	40	Autumn 1999	01/09/1999	Autumn	W	Piccardo et al., 2001	2001	1999	4	NA	NA	NA	NA	4.00061E-07	0.014684932	NA	0.441455329
613	IT	Sanremo	37.1.3	Tyrrhenian	43.80833	7.78683	1	Bivalvia	Mytiloida	Mytilidae	Mytilus galloprovincialis	Mediterranean mussel	Mytgal	neritic epipelagic benthic	2.69	SLB	NA	NA	NA	NA	NA	NA	DahA	HMW	Pyrolitic	DW	NA	NA	0.0026	0.00039	NA	NA	40	Autumn 1999	01/09/1999	Autumn	W	Piccardo et al., 2001	2001	1999	4	NA	NA	NA	NA	3.52571E-07	0.014684932	NA	4.1
614	IT	Sanremo	37.1.3	Tyrrhenian	43.80833	7.78683	1	Bivalvia	Mytiloida	Mytilidae	Mytilus galloprovincialis	Mediterranean mussel	Mytgal	neritic epipelagic benthic	2.69	SLB	NA	NA	NA	NA	NA	NA	DahA	HMW	Pyrolitic	DW	NA	NA	0.00002	0.000003	NA	NA	40	Autumn 1999	01/09/1999	Autumn	W	Piccardo et al., 2001	2001	1999	4	NA	NA	NA	NA	2.71208E-09	0.014684932	NA	4.1
615	IT	Sanremo	37.1.3	Tyrrhenian	43.80833	7.78683	1	Bivalvia	Mytiloida	Mytilidae	Mytilus galloprovincialis	Mediterranean mussel	Mytgal	neritic epipelagic benthic	2.69	SLB	NA	NA	NA	NA	NA	NA	Flu	MMW	Pyrolitic	DW	NA	NA	0.9243	0.138645	NA	NA	40	Autumn 1999	01/09/1999	Autumn	W	Piccardo et al., 2001	2001	1999	4	0.005095076	0.000764261	NA	NA	NA	0.014684932	0.04	NA
616	IT	Sanremo	37.1.3	Tyrrhenian	43.80833	7.78683	1	Bivalvia	Mytiloida	Mytilidae	Mytilus galloprovincialis	Mediterranean mussel	Mytgal	neritic epipelagic benthic	2.69	SLB	NA	NA	NA	NA	NA	NA	Flu	MMW	Pyrolitic	DW	NA	NA	0.0589	0.008835	NA	NA	40	Autumn 1999	01/09/1999	Autumn	W	Piccardo et al., 2001	2001	1999	4	0.000324678	4.87017E-05	NA	NA	NA	0.014684932	0.04	NA
617	IT	Sanremo	37.1.3	Tyrrhenian	43.80833	7.78683	1	Bivalvia	Mytiloida	Mytilidae	Mytilus galloprovincialis	Mediterranean mussel	Mytgal	neritic epipelagic benthic	2.69	SLB	NA	NA	NA	NA	NA	NA	Phe	LMW	Petrogenic	DW	NA	NA	0.4364	0.06546	NA	NA	40	Autumn 1999	01/09/1999	Autumn	W	Piccardo et al., 2001	2001	1999	4	NA	NA	NA	NA	NA	0.014684932	NA	NA
618	IT	Sanremo	37.1.3	Tyrrhenian	43.80833	7.78683	1	Bivalvia	Mytiloida	Mytilidae	Mytilus galloprovincialis	Mediterranean mussel	Mytgal	neritic epipelagic benthic	2.69	SLB	NA	NA	NA	NA	NA	NA	Phe	LMW	Petrogenic	DW	NA	NA	0.0305	0.004575	NA	NA	40	Autumn 1999	01/09/1999	Autumn	W	Piccardo et al., 2001	2001	1999	4	NA	NA	NA	NA	NA	0.014684932	NA	NA
619	IT	Sanremo	37.1.3	Tyrrhenian	43.80833	7.78683	1	Bivalvia	Mytiloida	Mytilidae	Mytilus galloprovincialis	Mediterranean mussel	Mytgal	neritic epipelagic benthic	2.69	SLB	NA	NA	NA	NA	NA	NA	Pyr	MMW	Pyrolitic	DW	NA	NA	0.298	0.0447	NA	NA	40	Autumn 1999	01/09/1999	Autumn	W	Piccardo et al., 2001	2001	1999	4	0.002190245	0.000328537	NA	NA	NA	0.014684932	0.03	NA
620	IT	Sanremo	37.1.3	Tyrrhenian	43.80833	7.78683	1	Bivalvia	Mytiloida	Mytilidae	Mytilus galloprovincialis	Mediterranean mussel	Mytgal	neritic epipelagic benthic	2.69	SLB	NA	NA	NA	NA	NA	NA	Pyr	MMW	Pyrolitic	DW	NA	NA	0.0407	0.006105	NA	NA	40	Autumn 1999	01/09/1999	Autumn	W	Piccardo et al., 2001	2001	1999	4	0.000299137	4.48706E-05	NA	NA	NA	0.014684932	0.03	NA
621	IT	Vado Ligure	37.1.3	Tyrrhenian	44.27167	8.45400	1	Bivalvia	Mytiloida	Mytilidae	Mytilus galloprovincialis	Mediterranean mussel	Mytgal	neritic epipelagic benthic	2.69	SLB	NA	NA	NA	NA	NA	NA	Ant	LMW	Petrogenic	DW	NA	NA	0.0042	0.00063	NA	NA	40	Spring 1999	01/03/1999	Spring	W	Piccardo et al., 2001	2001	1999	4	3.08692E-06	4.63038E-07	NA	NA	NA	0.014684932	0.3	NA
622	IT	Vado Ligure	37.1.3	Tyrrhenian	44.27167	8.45400	1	Bivalvia	Mytiloida	Mytilidae	Mytilus galloprovincialis	Mediterranean mussel	Mytgal	neritic epipelagic benthic	2.69	SLB	NA	NA	NA	NA	NA	NA	Ant	LMW	Petrogenic	DW	NA	NA	0.001	0.00015	NA	NA	40	Spring 1999	01/03/1999	Spring	W	Piccardo et al., 2001	2001	1999	4	7.34982E-07	1.10247E-07	NA	NA	NA	0.014684932	0.3	NA
623	IT	Vado Ligure	37.1.3	Tyrrhenian	44.27167	8.45400	1	Bivalvia	Mytiloida	Mytilidae	Mytilus galloprovincialis	Mediterranean mussel	Mytgal	neritic epipelagic benthic	2.69	SLB	NA	NA	NA	NA	NA	NA	BaA	HMW	Pyrolitic	DW	NA	NA	0.0176	0.00264	NA	NA	40	Spring 1999	01/03/1999	Spring	W	Piccardo et al., 2001	2001	1999	4	NA	NA	NA	NA	6.98526E-07	0.014684932	NA	1.2
624	IT	Vado Ligure	37.1.3	Tyrrhenian	44.27167	8.45400	1	Bivalvia	Mytiloida	Mytilidae	Mytilus galloprovincialis	Mediterranean mussel	Mytgal	neritic epipelagic benthic	2.69	SLB	NA	NA	NA	NA	NA	NA	BaA	HMW	Pyrolitic	DW	NA	NA	0.01	0.0015	NA	NA	40	Spring 1999	01/03/1999	Spring	W	Piccardo et al., 2001	2001	1999	4	NA	NA	NA	NA	3.9689E-07	0.014684932	NA	1.2
625	IT	Vado Ligure	37.1.3	Tyrrhenian	44.27167	8.45400	1	Bivalvia	Mytiloida	Mytilidae	Mytilus galloprovincialis	Mediterranean mussel	Mytgal	neritic epipelagic benthic	2.69	SLB	NA	NA	NA	NA	NA	NA	BaP	HMW	Pyrolitic	DW	NA	NA	0.0163	0.002445	NA	NA	40	Spring 1999	01/03/1999	Spring	W	Piccardo et al., 2001	2001	1999	4	0.011980199	0.00179703	NA	NA	1.56342E-06	0.014684932	0.0003	2.9
626	IT	Vado Ligure	37.1.3	Tyrrhenian	44.27167	8.45400	1	Bivalvia	Mytiloida	Mytilidae	Mytilus galloprovincialis	Mediterranean mussel	Mytgal	neritic epipelagic benthic	2.69	SLB	NA	NA	NA	NA	NA	NA	BaP	HMW	Pyrolitic	DW	NA	NA	0.0108	0.00162	NA	NA	40	Spring 1999	01/03/1999	Spring	W	Piccardo et al., 2001	2001	1999	4	0.007937801	0.00119067	NA	NA	1.03588E-06	0.014684932	0.0003	2.9
627	IT	Vado Ligure	37.1.3	Tyrrhenian	44.27167	8.45400	1	Bivalvia	Mytiloida	Mytilidae	Mytilus galloprovincialis	Mediterranean mussel	Mytgal	neritic epipelagic benthic	2.69	SLB	NA	NA	NA	NA	NA	NA	BbF	HMW	Pyrolitic	DW	NA	NA	0.0287	0.004305	NA	NA	40	Spring 1999	01/03/1999	Spring	W	Piccardo et al., 2001	2001	1999	4	NA	NA	NA	NA	1.13907E-06	0.014684932	NA	1.2
628	IT	Vado Ligure	37.1.3	Tyrrhenian	44.27167	8.45400	1	Bivalvia	Mytiloida	Mytilidae	Mytilus galloprovincialis	Mediterranean mussel	Mytgal	neritic epipelagic benthic	2.69	SLB	NA	NA	NA	NA	NA	NA	BbF	HMW	Pyrolitic	DW	NA	NA	0.0185	0.002775	NA	NA	40	Spring 1999	01/03/1999	Spring	W	Piccardo et al., 2001	2001	1999	4	NA	NA	NA	NA	7.34247E-07	0.014684932	NA	1.2
629	IT	Vado Ligure	37.1.3	Tyrrhenian	44.27167	8.45400	1	Bivalvia	Mytiloida	Mytilidae	Mytilus galloprovincialis	Mediterranean mussel	Mytgal	neritic epipelagic benthic	2.69	SLB	NA	NA	NA	NA	NA	NA	BghiP	HMW	Pyrolitic	DW	NA	NA	0.017	0.00255	NA	NA	40	Spring 1999	01/03/1999	Spring	W	Piccardo et al., 2001	2001	1999	4	NA	NA	NA	NA	NA	0.014684932	NA	NA
630	IT	Vado Ligure	37.1.3	Tyrrhenian	44.27167	8.45400	1	Bivalvia	Mytiloida	Mytilidae	Mytilus galloprovincialis	Mediterranean mussel	Mytgal	neritic epipelagic benthic	2.69	SLB	NA	NA	NA	NA	NA	NA	BghiP	HMW	Pyrolitic	DW	NA	NA	0.014	0.0021	NA	NA	40	Spring 1999	01/03/1999	Spring	W	Piccardo et al., 2001	2001	1999	4	NA	NA	NA	NA	NA	0.014684932	NA	NA
631	IT	Vado Ligure	37.1.3	Tyrrhenian	44.27167	8.45400	1	Bivalvia	Mytiloida	Mytilidae	Mytilus galloprovincialis	Mediterranean mussel	Mytgal	neritic epipelagic benthic	2.69	SLB	NA	NA	NA	NA	NA	NA	BkF	HMW	Pyrolitic	DW	NA	NA	0.0141	0.002115	NA	NA	40	Spring 1999	01/03/1999	Spring	W	Piccardo et al., 2001	2001	1999	4	NA	NA	NA	NA	5.59615E-07	0.014684932	NA	1.2
632	IT	Vado Ligure	37.1.3	Tyrrhenian	44.27167	8.45400	1	Bivalvia	Mytiloida	Mytilidae	Mytilus galloprovincialis	Mediterranean mussel	Mytgal	neritic epipelagic benthic	2.69	SLB	NA	NA	NA	NA	NA	NA	BkF	HMW	Pyrolitic	DW	NA	NA	0.0085	0.001275	NA	NA	40	Spring 1999	01/03/1999	Spring	W	Piccardo et al., 2001	2001	1999	4	NA	NA	NA	NA	3.37357E-07	0.014684932	NA	1.2
633	IT	Vado Ligure	37.1.3	Tyrrhenian	44.27167	8.45400	1	Bivalvia	Mytiloida	Mytilidae	Mytilus galloprovincialis	Mediterranean mussel	Mytgal	neritic epipelagic benthic	2.69	SLB	NA	NA	NA	NA	NA	NA	Chr	HMW	Pyrolitic	DW	NA	NA	0.0192	0.00288	NA	NA	40	Spring 1999	01/03/1999	Spring	W	Piccardo et al., 2001	2001	1999	4	NA	NA	NA	NA	2.80335E-07	0.014684932	NA	0.441455329
634	IT	Vado Ligure	37.1.3	Tyrrhenian	44.27167	8.45400	1	Bivalvia	Mytiloida	Mytilidae	Mytilus galloprovincialis	Mediterranean mussel	Mytgal	neritic epipelagic benthic	2.69	SLB	NA	NA	NA	NA	NA	NA	Chr	HMW	Pyrolitic	DW	NA	NA	0.0113	0.001695	NA	NA	40	Spring 1999	01/03/1999	Spring	W	Piccardo et al., 2001	2001	1999	4	NA	NA	NA	NA	1.64989E-07	0.014684932	NA	0.441455329
635	IT	Vado Ligure	37.1.3	Tyrrhenian	44.27167	8.45400	1	Bivalvia	Mytiloida	Mytilidae	Mytilus galloprovincialis	Mediterranean mussel	Mytgal	neritic epipelagic benthic	2.69	SLB	NA	NA	NA	NA	NA	NA	DahA	HMW	Pyrolitic	DW	NA	NA	0.0026	0.00039	NA	NA	40	Spring 1999	01/03/1999	Spring	W	Piccardo et al., 2001	2001	1999	4	NA	NA	NA	NA	3.52571E-07	0.014684932	NA	4.1
636	IT	Vado Ligure	37.1.3	Tyrrhenian	44.27167	8.45400	1	Bivalvia	Mytiloida	Mytilidae	Mytilus galloprovincialis	Mediterranean mussel	Mytgal	neritic epipelagic benthic	2.69	SLB	NA	NA	NA	NA	NA	NA	DahA	HMW	Pyrolitic	DW	NA	NA	0.0019	0.000285	NA	NA	40	Spring 1999	01/03/1999	Spring	W	Piccardo et al., 2001	2001	1999	4	NA	NA	NA	NA	2.57648E-07	0.014684932	NA	4.1
637	IT	Vado Ligure	37.1.3	Tyrrhenian	44.27167	8.45400	1	Bivalvia	Mytiloida	Mytilidae	Mytilus galloprovincialis	Mediterranean mussel	Mytgal	neritic epipelagic benthic	2.69	SLB	NA	NA	NA	NA	NA	NA	Flu	MMW	Pyrolitic	DW	NA	NA	0.135	0.02025	NA	NA	40	Spring 1999	01/03/1999	Spring	W	Piccardo et al., 2001	2001	1999	4	0.000744169	0.000111625	NA	NA	NA	0.014684932	0.04	NA
638	IT	Vado Ligure	37.1.3	Tyrrhenian	44.27167	8.45400	1	Bivalvia	Mytiloida	Mytilidae	Mytilus galloprovincialis	Mediterranean mussel	Mytgal	neritic epipelagic benthic	2.69	SLB	NA	NA	NA	NA	NA	NA	Flu	MMW	Pyrolitic	DW	NA	NA	0.0386	0.00579	NA	NA	40	Spring 1999	01/03/1999	Spring	W	Piccardo et al., 2001	2001	1999	4	0.000212777	3.19166E-05	NA	NA	NA	0.014684932	0.04	NA
639	IT	Vado Ligure	37.1.3	Tyrrhenian	44.27167	8.45400	1	Bivalvia	Mytiloida	Mytilidae	Mytilus galloprovincialis	Mediterranean mussel	Mytgal	neritic epipelagic benthic	2.69	SLB	NA	NA	NA	NA	NA	NA	Phe	LMW	Petrogenic	DW	NA	NA	0.0452	0.00678	NA	NA	40	Spring 1999	01/03/1999	Spring	W	Piccardo et al., 2001	2001	1999	4	NA	NA	NA	NA	NA	0.014684932	NA	NA
640	IT	Vado Ligure	37.1.3	Tyrrhenian	44.27167	8.45400	1	Bivalvia	Mytiloida	Mytilidae	Mytilus galloprovincialis	Mediterranean mussel	Mytgal	neritic epipelagic benthic	2.69	SLB	NA	NA	NA	NA	NA	NA	Phe	LMW	Petrogenic	DW	NA	NA	0.0139	0.002085	NA	NA	40	Spring 1999	01/03/1999	Spring	W	Piccardo et al., 2001	2001	1999	4	NA	NA	NA	NA	NA	0.014684932	NA	NA
641	IT	Vado Ligure	37.1.3	Tyrrhenian	44.27167	8.45400	1	Bivalvia	Mytiloida	Mytilidae	Mytilus galloprovincialis	Mediterranean mussel	Mytgal	neritic epipelagic benthic	2.69	SLB	NA	NA	NA	NA	NA	NA	Pyr	MMW	Pyrolitic	DW	NA	NA	0.0529	0.007935	NA	NA	40	Spring 1999	01/03/1999	Spring	W	Piccardo et al., 2001	2001	1999	4	0.000388805	5.83208E-05	NA	NA	NA	0.014684932	0.03	NA
642	IT	Vado Ligure	37.1.3	Tyrrhenian	44.27167	8.45400	1	Bivalvia	Mytiloida	Mytilidae	Mytilus galloprovincialis	Mediterranean mussel	Mytgal	neritic epipelagic benthic	2.69	SLB	NA	NA	NA	NA	NA	NA	Pyr	MMW	Pyrolitic	DW	NA	NA	0.0129	0.001935	NA	NA	40	Spring 1999	01/03/1999	Spring	W	Piccardo et al., 2001	2001	1999	4	9.48126E-05	1.42219E-05	NA	NA	NA	0.014684932	0.03	NA
643	IT	Vado Ligure	37.1.3	Tyrrhenian	44.27167	8.45400	1	Bivalvia	Mytiloida	Mytilidae	Mytilus galloprovincialis	Mediterranean mussel	Mytgal	neritic epipelagic benthic	2.69	SLB	NA	NA	NA	NA	NA	NA	Ant	LMW	Petrogenic	DW	NA	NA	0.0046	0.00069	NA	NA	40	Autumn 1999	01/09/1999	Autumn	W	Piccardo et al., 2001	2001	1999	4	3.38092E-06	5.07137E-07	NA	NA	NA	0.014684932	0.3	NA
644	IT	Vado Ligure	37.1.3	Tyrrhenian	44.27167	8.45400	1	Bivalvia	Mytiloida	Mytilidae	Mytilus galloprovincialis	Mediterranean mussel	Mytgal	neritic epipelagic benthic	2.69	SLB	NA	NA	NA	NA	NA	NA	Ant	LMW	Petrogenic	DW	NA	NA	0.0031	0.000465	NA	NA	40	Autumn 1999	01/09/1999	Autumn	W	Piccardo et al., 2001	2001	1999	4	2.27844E-06	3.41766E-07	NA	NA	NA	0.014684932	0.3	NA
645	IT	Vado Ligure	37.1.3	Tyrrhenian	44.27167	8.45400	1	Bivalvia	Mytiloida	Mytilidae	Mytilus galloprovincialis	Mediterranean mussel	Mytgal	neritic epipelagic benthic	2.69	SLB	NA	NA	NA	NA	NA	NA	BaA	HMW	Pyrolitic	DW	NA	NA	0.0295	0.004425	NA	NA	40	Autumn 1999	01/09/1999	Autumn	W	Piccardo et al., 2001	2001	1999	4	NA	NA	NA	NA	1.17083E-06	0.014684932	NA	1.2
646	IT	Vado Ligure	37.1.3	Tyrrhenian	44.27167	8.45400	1	Bivalvia	Mytiloida	Mytilidae	Mytilus galloprovincialis	Mediterranean mussel	Mytgal	neritic epipelagic benthic	2.69	SLB	NA	NA	NA	NA	NA	NA	BaA	HMW	Pyrolitic	DW	NA	NA	0.022	0.0033	NA	NA	40	Autumn 1999	01/09/1999	Autumn	W	Piccardo et al., 2001	2001	1999	4	NA	NA	NA	NA	8.73158E-07	0.014684932	NA	1.2
647	IT	Vado Ligure	37.1.3	Tyrrhenian	44.27167	8.45400	1	Bivalvia	Mytiloida	Mytilidae	Mytilus galloprovincialis	Mediterranean mussel	Mytgal	neritic epipelagic benthic	2.69	SLB	NA	NA	NA	NA	NA	NA	BaP	HMW	Pyrolitic	DW	NA	NA	0.0224	0.00336	NA	NA	40	Autumn 1999	01/09/1999	Autumn	W	Piccardo et al., 2001	2001	1999	4	0.016463587	0.002469538	NA	NA	2.1485E-06	0.014684932	0.0003	2.9
648	IT	Vado Ligure	37.1.3	Tyrrhenian	44.27167	8.45400	1	Bivalvia	Mytiloida	Mytilidae	Mytilus galloprovincialis	Mediterranean mussel	Mytgal	neritic epipelagic benthic	2.69	SLB	NA	NA	NA	NA	NA	NA	BaP	HMW	Pyrolitic	DW	NA	NA	0.01	0.0015	NA	NA	40	Autumn 1999	01/09/1999	Autumn	W	Piccardo et al., 2001	2001	1999	4	0.007349816	0.001102472	NA	NA	9.59151E-07	0.014684932	0.0003	2.9
649	IT	Vado Ligure	37.1.3	Tyrrhenian	44.27167	8.45400	1	Bivalvia	Mytiloida	Mytilidae	Mytilus galloprovincialis	Mediterranean mussel	Mytgal	neritic epipelagic benthic	2.69	SLB	NA	NA	NA	NA	NA	NA	BbF	HMW	Pyrolitic	DW	NA	NA	0.0503	0.007545	NA	NA	40	Autumn 1999	01/09/1999	Autumn	W	Piccardo et al., 2001	2001	1999	4	NA	NA	NA	NA	1.99636E-06	0.014684932	NA	1.2
650	IT	Vado Ligure	37.1.3	Tyrrhenian	44.27167	8.45400	1	Bivalvia	Mytiloida	Mytilidae	Mytilus galloprovincialis	Mediterranean mussel	Mytgal	neritic epipelagic benthic	2.69	SLB	NA	NA	NA	NA	NA	NA	BbF	HMW	Pyrolitic	DW	NA	NA	0.0337	0.005055	NA	NA	40	Autumn 1999	01/09/1999	Autumn	W	Piccardo et al., 2001	2001	1999	4	NA	NA	NA	NA	1.33752E-06	0.014684932	NA	1.2
651	IT	Vado Ligure	37.1.3	Tyrrhenian	44.27167	8.45400	1	Bivalvia	Mytiloida	Mytilidae	Mytilus galloprovincialis	Mediterranean mussel	Mytgal	neritic epipelagic benthic	2.69	SLB	NA	NA	NA	NA	NA	NA	BghiP	HMW	Pyrolitic	DW	NA	NA	0.0255	0.003825	NA	NA	40	Autumn 1999	01/09/1999	Autumn	W	Piccardo et al., 2001	2001	1999	4	NA	NA	NA	NA	NA	0.014684932	NA	NA
652	IT	Vado Ligure	37.1.3	Tyrrhenian	44.27167	8.45400	1	Bivalvia	Mytiloida	Mytilidae	Mytilus galloprovincialis	Mediterranean mussel	Mytgal	neritic epipelagic benthic	2.69	SLB	NA	NA	NA	NA	NA	NA	BghiP	HMW	Pyrolitic	DW	NA	NA	0.014	0.0021	NA	NA	40	Autumn 1999	01/09/1999	Autumn	W	Piccardo et al., 2001	2001	1999	4	NA	NA	NA	NA	NA	0.014684932	NA	NA
653	IT	Vado Ligure	37.1.3	Tyrrhenian	44.27167	8.45400	1	Bivalvia	Mytiloida	Mytilidae	Mytilus galloprovincialis	Mediterranean mussel	Mytgal	neritic epipelagic benthic	2.69	SLB	NA	NA	NA	NA	NA	NA	BkF	HMW	Pyrolitic	DW	NA	NA	0.0189	0.002835	NA	NA	40	Autumn 1999	01/09/1999	Autumn	W	Piccardo et al., 2001	2001	1999	4	NA	NA	NA	NA	7.50122E-07	0.014684932	NA	1.2
654	IT	Vado Ligure	37.1.3	Tyrrhenian	44.27167	8.45400	1	Bivalvia	Mytiloida	Mytilidae	Mytilus galloprovincialis	Mediterranean mussel	Mytgal	neritic epipelagic benthic	2.69	SLB	NA	NA	NA	NA	NA	NA	BkF	HMW	Pyrolitic	DW	NA	NA	0.0113	0.001695	NA	NA	40	Autumn 1999	01/09/1999	Autumn	W	Piccardo et al., 2001	2001	1999	4	NA	NA	NA	NA	4.48486E-07	0.014684932	NA	1.2
655	IT	Vado Ligure	37.1.3	Tyrrhenian	44.27167	8.45400	1	Bivalvia	Mytiloida	Mytilidae	Mytilus galloprovincialis	Mediterranean mussel	Mytgal	neritic epipelagic benthic	2.69	SLB	NA	NA	NA	NA	NA	NA	Chr	HMW	Pyrolitic	DW	NA	NA	0.0364	0.00546	NA	NA	40	Autumn 1999	01/09/1999	Autumn	W	Piccardo et al., 2001	2001	1999	4	NA	NA	NA	NA	5.31468E-07	0.014684932	NA	0.441455329
656	IT	Vado Ligure	37.1.3	Tyrrhenian	44.27167	8.45400	1	Bivalvia	Mytiloida	Mytilidae	Mytilus galloprovincialis	Mediterranean mussel	Mytgal	neritic epipelagic benthic	2.69	SLB	NA	NA	NA	NA	NA	NA	Chr	HMW	Pyrolitic	DW	NA	NA	0.0316	0.00474	NA	NA	40	Autumn 1999	01/09/1999	Autumn	W	Piccardo et al., 2001	2001	1999	4	NA	NA	NA	NA	4.61384E-07	0.014684932	NA	0.441455329
657	IT	Vado Ligure	37.1.3	Tyrrhenian	44.27167	8.45400	1	Bivalvia	Mytiloida	Mytilidae	Mytilus galloprovincialis	Mediterranean mussel	Mytgal	neritic epipelagic benthic	2.69	SLB	NA	NA	NA	NA	NA	NA	DahA	HMW	Pyrolitic	DW	NA	NA	0.0012	0.00018	NA	NA	40	Autumn 1999	01/09/1999	Autumn	W	Piccardo et al., 2001	2001	1999	4	NA	NA	NA	NA	1.62725E-07	0.014684932	NA	4.1
658	IT	Vado Ligure	37.1.3	Tyrrhenian	44.27167	8.45400	1	Bivalvia	Mytiloida	Mytilidae	Mytilus galloprovincialis	Mediterranean mussel	Mytgal	neritic epipelagic benthic	2.69	SLB	NA	NA	NA	NA	NA	NA	DahA	HMW	Pyrolitic	DW	NA	NA	0.0002	0.00003	NA	NA	40	Autumn 1999	01/09/1999	Autumn	W	Piccardo et al., 2001	2001	1999	4	NA	NA	NA	NA	2.71208E-08	0.014684932	NA	4.1
659	IT	Vado Ligure	37.1.3	Tyrrhenian	44.27167	8.45400	1	Bivalvia	Mytiloida	Mytilidae	Mytilus galloprovincialis	Mediterranean mussel	Mytgal	neritic epipelagic benthic	2.69	SLB	NA	NA	NA	NA	NA	NA	Flu	MMW	Pyrolitic	DW	NA	NA	0.0667	0.010005	NA	NA	40	Autumn 1999	01/09/1999	Autumn	W	Piccardo et al., 2001	2001	1999	4	0.000367675	5.51512E-05	NA	NA	NA	0.014684932	0.04	NA
660	IT	Vado Ligure	37.1.3	Tyrrhenian	44.27167	8.45400	1	Bivalvia	Mytiloida	Mytilidae	Mytilus galloprovincialis	Mediterranean mussel	Mytgal	neritic epipelagic benthic	2.69	SLB	NA	NA	NA	NA	NA	NA	Flu	MMW	Pyrolitic	DW	NA	NA	0.0444	0.00666	NA	NA	40	Autumn 1999	01/09/1999	Autumn	W	Piccardo et al., 2001	2001	1999	4	0.000244749	3.67123E-05	NA	NA	NA	0.014684932	0.04	NA
661	IT	Vado Ligure	37.1.3	Tyrrhenian	44.27167	8.45400	1	Bivalvia	Mytiloida	Mytilidae	Mytilus galloprovincialis	Mediterranean mussel	Mytgal	neritic epipelagic benthic	2.69	SLB	NA	NA	NA	NA	NA	NA	Phe	LMW	Petrogenic	DW	NA	NA	0.0216	0.00324	NA	NA	40	Autumn 1999	01/09/1999	Autumn	W	Piccardo et al., 2001	2001	1999	4	NA	NA	NA	NA	NA	0.014684932	NA	NA
662	IT	Vado Ligure	37.1.3	Tyrrhenian	44.27167	8.45400	1	Bivalvia	Mytiloida	Mytilidae	Mytilus galloprovincialis	Mediterranean mussel	Mytgal	neritic epipelagic benthic	2.69	SLB	NA	NA	NA	NA	NA	NA	Phe	LMW	Petrogenic	DW	NA	NA	0.0196	0.00294	NA	NA	40	Autumn 1999	01/09/1999	Autumn	W	Piccardo et al., 2001	2001	1999	4	NA	NA	NA	NA	NA	0.014684932	NA	NA
663	IT	Vado Ligure	37.1.3	Tyrrhenian	44.27167	8.45400	1	Bivalvia	Mytiloida	Mytilidae	Mytilus galloprovincialis	Mediterranean mussel	Mytgal	neritic epipelagic benthic	2.69	SLB	NA	NA	NA	NA	NA	NA	Pyr	MMW	Pyrolitic	DW	NA	NA	0.029	0.00435	NA	NA	40	Autumn 1999	01/09/1999	Autumn	W	Piccardo et al., 2001	2001	1999	4	0.000213145	3.19717E-05	NA	NA	NA	0.014684932	0.03	NA
664	IT	Vado Ligure	37.1.3	Tyrrhenian	44.27167	8.45400	1	Bivalvia	Mytiloida	Mytilidae	Mytilus galloprovincialis	Mediterranean mussel	Mytgal	neritic epipelagic benthic	2.69	SLB	NA	NA	NA	NA	NA	NA	Pyr	MMW	Pyrolitic	DW	NA	NA	0.0175	0.002625	NA	NA	40	Autumn 1999	01/09/1999	Autumn	W	Piccardo et al., 2001	2001	1999	4	0.000128622	1.92933E-05	NA	NA	NA	0.014684932	0.03	NA
665	IT	Voltri	37.1.3	Tyrrhenian	44.40833	8.76950	1	Bivalvia	Mytiloida	Mytilidae	Mytilus galloprovincialis	Mediterranean mussel	Mytgal	neritic epipelagic benthic	2.69	SLB	NA	NA	NA	NA	NA	NA	Ant	LMW	Petrogenic	DW	NA	NA	0.0059	0.000885	NA	NA	40	Spring 1999	01/03/1999	Spring	W	Piccardo et al., 2001	2001	1999	4	4.33639E-06	6.50459E-07	NA	NA	NA	0.014684932	0.3	NA
666	IT	Voltri	37.1.3	Tyrrhenian	44.40833	8.76950	1	Bivalvia	Mytiloida	Mytilidae	Mytilus galloprovincialis	Mediterranean mussel	Mytgal	neritic epipelagic benthic	2.69	SLB	NA	NA	NA	NA	NA	NA	Ant	LMW	Petrogenic	DW	NA	NA	0.0009	0.000135	NA	NA	40	Spring 1999	01/03/1999	Spring	W	Piccardo et al., 2001	2001	1999	4	6.61483E-07	9.92225E-08	NA	NA	NA	0.014684932	0.3	NA
667	IT	Voltri	37.1.3	Tyrrhenian	44.40833	8.76950	1	Bivalvia	Mytiloida	Mytilidae	Mytilus galloprovincialis	Mediterranean mussel	Mytgal	neritic epipelagic benthic	2.69	SLB	NA	NA	NA	NA	NA	NA	BaA	HMW	Pyrolitic	DW	NA	NA	0.0301	0.004515	NA	NA	40	Spring 1999	01/03/1999	Spring	W	Piccardo et al., 2001	2001	1999	4	NA	NA	NA	NA	1.19464E-06	0.014684932	NA	1.2
668	IT	Voltri	37.1.3	Tyrrhenian	44.40833	8.76950	1	Bivalvia	Mytiloida	Mytilidae	Mytilus galloprovincialis	Mediterranean mussel	Mytgal	neritic epipelagic benthic	2.69	SLB	NA	NA	NA	NA	NA	NA	BaA	HMW	Pyrolitic	DW	NA	NA	0.0071	0.001065	NA	NA	40	Spring 1999	01/03/1999	Spring	W	Piccardo et al., 2001	2001	1999	4	NA	NA	NA	NA	2.81792E-07	0.014684932	NA	1.2
669	IT	Voltri	37.1.3	Tyrrhenian	44.40833	8.76950	1	Bivalvia	Mytiloida	Mytilidae	Mytilus galloprovincialis	Mediterranean mussel	Mytgal	neritic epipelagic benthic	2.69	SLB	NA	NA	NA	NA	NA	NA	BaP	HMW	Pyrolitic	DW	NA	NA	0.0235	0.003525	NA	NA	40	Spring 1999	01/03/1999	Spring	W	Piccardo et al., 2001	2001	1999	4	0.017272067	0.00259081	NA	NA	2.254E-06	0.014684932	0.0003	2.9
670	IT	Voltri	37.1.3	Tyrrhenian	44.40833	8.76950	1	Bivalvia	Mytiloida	Mytilidae	Mytilus galloprovincialis	Mediterranean mussel	Mytgal	neritic epipelagic benthic	2.69	SLB	NA	NA	NA	NA	NA	NA	BaP	HMW	Pyrolitic	DW	NA	NA	0.0061	0.000915	NA	NA	40	Spring 1999	01/03/1999	Spring	W	Piccardo et al., 2001	2001	1999	4	0.004483387	0.000672508	NA	NA	5.85082E-07	0.014684932	0.0003	2.9
671	IT	Voltri	37.1.3	Tyrrhenian	44.40833	8.76950	1	Bivalvia	Mytiloida	Mytilidae	Mytilus galloprovincialis	Mediterranean mussel	Mytgal	neritic epipelagic benthic	2.69	SLB	NA	NA	NA	NA	NA	NA	BbF	HMW	Pyrolitic	DW	NA	NA	0.041	0.00615	NA	NA	40	Spring 1999	01/03/1999	Spring	W	Piccardo et al., 2001	2001	1999	4	NA	NA	NA	NA	1.62725E-06	0.014684932	NA	1.2
672	IT	Voltri	37.1.3	Tyrrhenian	44.40833	8.76950	1	Bivalvia	Mytiloida	Mytilidae	Mytilus galloprovincialis	Mediterranean mussel	Mytgal	neritic epipelagic benthic	2.69	SLB	NA	NA	NA	NA	NA	NA	BbF	HMW	Pyrolitic	DW	NA	NA	0.0128	0.00192	NA	NA	40	Spring 1999	01/03/1999	Spring	W	Piccardo et al., 2001	2001	1999	4	NA	NA	NA	NA	5.08019E-07	0.014684932	NA	1.2
673	IT	Voltri	37.1.3	Tyrrhenian	44.40833	8.76950	1	Bivalvia	Mytiloida	Mytilidae	Mytilus galloprovincialis	Mediterranean mussel	Mytgal	neritic epipelagic benthic	2.69	SLB	NA	NA	NA	NA	NA	NA	BghiP	HMW	Pyrolitic	DW	NA	NA	0.0298	0.00447	NA	NA	40	Spring 1999	01/03/1999	Spring	W	Piccardo et al., 2001	2001	1999	4	NA	NA	NA	NA	NA	0.014684932	NA	NA
674	IT	Voltri	37.1.3	Tyrrhenian	44.40833	8.76950	1	Bivalvia	Mytiloida	Mytilidae	Mytilus galloprovincialis	Mediterranean mussel	Mytgal	neritic epipelagic benthic	2.69	SLB	NA	NA	NA	NA	NA	NA	BghiP	HMW	Pyrolitic	DW	NA	NA	0.007	0.00105	NA	NA	40	Spring 1999	01/03/1999	Spring	W	Piccardo et al., 2001	2001	1999	4	NA	NA	NA	NA	NA	0.014684932	NA	NA
675	IT	Voltri	37.1.3	Tyrrhenian	44.40833	8.76950	1	Bivalvia	Mytiloida	Mytilidae	Mytilus galloprovincialis	Mediterranean mussel	Mytgal	neritic epipelagic benthic	2.69	SLB	NA	NA	NA	NA	NA	NA	BkF	HMW	Pyrolitic	DW	NA	NA	0.0189	0.002835	NA	NA	40	Spring 1999	01/03/1999	Spring	W	Piccardo et al., 2001	2001	1999	4	NA	NA	NA	NA	7.50122E-07	0.014684932	NA	1.2
676	IT	Voltri	37.1.3	Tyrrhenian	44.40833	8.76950	1	Bivalvia	Mytiloida	Mytilidae	Mytilus galloprovincialis	Mediterranean mussel	Mytgal	neritic epipelagic benthic	2.69	SLB	NA	NA	NA	NA	NA	NA	BkF	HMW	Pyrolitic	DW	NA	NA	0.0073	0.001095	NA	NA	40	Spring 1999	01/03/1999	Spring	W	Piccardo et al., 2001	2001	1999	4	NA	NA	NA	NA	2.8973E-07	0.014684932	NA	1.2
677	IT	Voltri	37.1.3	Tyrrhenian	44.40833	8.76950	1	Bivalvia	Mytiloida	Mytilidae	Mytilus galloprovincialis	Mediterranean mussel	Mytgal	neritic epipelagic benthic	2.69	SLB	NA	NA	NA	NA	NA	NA	Chr	HMW	Pyrolitic	DW	NA	NA	0.0334	0.00501	NA	NA	40	Spring 1999	01/03/1999	Spring	W	Piccardo et al., 2001	2001	1999	4	NA	NA	NA	NA	4.87666E-07	0.014684932	NA	0.441455329
678	IT	Voltri	37.1.3	Tyrrhenian	44.40833	8.76950	1	Bivalvia	Mytiloida	Mytilidae	Mytilus galloprovincialis	Mediterranean mussel	Mytgal	neritic epipelagic benthic	2.69	SLB	NA	NA	NA	NA	NA	NA	Chr	HMW	Pyrolitic	DW	NA	NA	0.0112	0.00168	NA	NA	40	Spring 1999	01/03/1999	Spring	W	Piccardo et al., 2001	2001	1999	4	NA	NA	NA	NA	1.63529E-07	0.014684932	NA	0.441455329
679	IT	Voltri	37.1.3	Tyrrhenian	44.40833	8.76950	1	Bivalvia	Mytiloida	Mytilidae	Mytilus galloprovincialis	Mediterranean mussel	Mytgal	neritic epipelagic benthic	2.69	SLB	NA	NA	NA	NA	NA	NA	DahA	HMW	Pyrolitic	DW	NA	NA	0.0027	0.000405	NA	NA	40	Spring 1999	01/03/1999	Spring	W	Piccardo et al., 2001	2001	1999	4	NA	NA	NA	NA	3.66131E-07	0.014684932	NA	4.1
680	IT	Voltri	37.1.3	Tyrrhenian	44.40833	8.76950	1	Bivalvia	Mytiloida	Mytilidae	Mytilus galloprovincialis	Mediterranean mussel	Mytgal	neritic epipelagic benthic	2.69	SLB	NA	NA	NA	NA	NA	NA	DahA	HMW	Pyrolitic	DW	NA	NA	0.0019	0.000285	NA	NA	40	Spring 1999	01/03/1999	Spring	W	Piccardo et al., 2001	2001	1999	4	NA	NA	NA	NA	2.57648E-07	0.014684932	NA	4.1
681	IT	Voltri	37.1.3	Tyrrhenian	44.40833	8.76950	1	Bivalvia	Mytiloida	Mytilidae	Mytilus galloprovincialis	Mediterranean mussel	Mytgal	neritic epipelagic benthic	2.69	SLB	NA	NA	NA	NA	NA	NA	Flu	MMW	Pyrolitic	DW	NA	NA	0.1996	0.02994	NA	NA	40	Spring 1999	01/03/1999	Spring	W	Piccardo et al., 2001	2001	1999	4	0.001100267	0.00016504	NA	NA	NA	0.014684932	0.04	NA
682	IT	Voltri	37.1.3	Tyrrhenian	44.40833	8.76950	1	Bivalvia	Mytiloida	Mytilidae	Mytilus galloprovincialis	Mediterranean mussel	Mytgal	neritic epipelagic benthic	2.69	SLB	NA	NA	NA	NA	NA	NA	Flu	MMW	Pyrolitic	DW	NA	NA	0.0367	0.005505	NA	NA	40	Spring 1999	01/03/1999	Spring	W	Piccardo et al., 2001	2001	1999	4	0.000202304	3.03456E-05	NA	NA	NA	0.014684932	0.04	NA
683	IT	Voltri	37.1.3	Tyrrhenian	44.40833	8.76950	1	Bivalvia	Mytiloida	Mytilidae	Mytilus galloprovincialis	Mediterranean mussel	Mytgal	neritic epipelagic benthic	2.69	SLB	NA	NA	NA	NA	NA	NA	Phe	LMW	Petrogenic	DW	NA	NA	0.0694	0.01041	NA	NA	40	Spring 1999	01/03/1999	Spring	W	Piccardo et al., 2001	2001	1999	4	NA	NA	NA	NA	NA	0.014684932	NA	NA
684	IT	Voltri	37.1.3	Tyrrhenian	44.40833	8.76950	1	Bivalvia	Mytiloida	Mytilidae	Mytilus galloprovincialis	Mediterranean mussel	Mytgal	neritic epipelagic benthic	2.69	SLB	NA	NA	NA	NA	NA	NA	Phe	LMW	Petrogenic	DW	NA	NA	0.0254	0.00381	NA	NA	40	Spring 1999	01/03/1999	Spring	W	Piccardo et al., 2001	2001	1999	4	NA	NA	NA	NA	NA	0.014684932	NA	NA
685	IT	Voltri	37.1.3	Tyrrhenian	44.40833	8.76950	1	Bivalvia	Mytiloida	Mytilidae	Mytilus galloprovincialis	Mediterranean mussel	Mytgal	neritic epipelagic benthic	2.69	SLB	NA	NA	NA	NA	NA	NA	Pyr	MMW	Pyrolitic	DW	NA	NA	0.0741	0.011115	NA	NA	40	Spring 1999	01/03/1999	Spring	W	Piccardo et al., 2001	2001	1999	4	0.000544621	8.16932E-05	NA	NA	NA	0.014684932	0.03	NA
686	IT	Voltri	37.1.3	Tyrrhenian	44.40833	8.76950	1	Bivalvia	Mytiloida	Mytilidae	Mytilus galloprovincialis	Mediterranean mussel	Mytgal	neritic epipelagic benthic	2.69	SLB	NA	NA	NA	NA	NA	NA	Pyr	MMW	Pyrolitic	DW	NA	NA	0.0123	0.001845	NA	NA	40	Spring 1999	01/03/1999	Spring	W	Piccardo et al., 2001	2001	1999	4	9.04027E-05	1.35604E-05	NA	NA	NA	0.014684932	0.03	NA
687	IT	Voltri	37.1.3	Tyrrhenian	44.40833	8.76950	1	Bivalvia	Mytiloida	Mytilidae	Mytilus galloprovincialis	Mediterranean mussel	Mytgal	neritic epipelagic benthic	2.69	SLB	NA	NA	NA	NA	NA	NA	Ant	LMW	Petrogenic	DW	NA	NA	0.0091	0.001365	NA	NA	40	Autumn 1999	01/09/1999	Autumn	W	Piccardo et al., 2001	2001	1999	4	6.68833E-06	1.00325E-06	NA	NA	NA	0.014684932	0.3	NA
688	IT	Voltri	37.1.3	Tyrrhenian	44.40833	8.76950	1	Bivalvia	Mytiloida	Mytilidae	Mytilus galloprovincialis	Mediterranean mussel	Mytgal	neritic epipelagic benthic	2.69	SLB	NA	NA	NA	NA	NA	NA	Ant	LMW	Petrogenic	DW	NA	NA	0.0032	0.00048	NA	NA	40	Autumn 1999	01/09/1999	Autumn	W	Piccardo et al., 2001	2001	1999	4	2.35194E-06	3.52791E-07	NA	NA	NA	0.014684932	0.3	NA
689	IT	Voltri	37.1.3	Tyrrhenian	44.40833	8.76950	1	Bivalvia	Mytiloida	Mytilidae	Mytilus galloprovincialis	Mediterranean mussel	Mytgal	neritic epipelagic benthic	2.69	SLB	NA	NA	NA	NA	NA	NA	BaA	HMW	Pyrolitic	DW	NA	NA	0.096	0.0144	NA	NA	40	Autumn 1999	01/09/1999	Autumn	W	Piccardo et al., 2001	2001	1999	4	NA	NA	NA	NA	3.81014E-06	0.014684932	NA	1.2
690	IT	Voltri	37.1.3	Tyrrhenian	44.40833	8.76950	1	Bivalvia	Mytiloida	Mytilidae	Mytilus galloprovincialis	Mediterranean mussel	Mytgal	neritic epipelagic benthic	2.69	SLB	NA	NA	NA	NA	NA	NA	BaA	HMW	Pyrolitic	DW	NA	NA	0.0415	0.006225	NA	NA	40	Autumn 1999	01/09/1999	Autumn	W	Piccardo et al., 2001	2001	1999	4	NA	NA	NA	NA	1.64709E-06	0.014684932	NA	1.2
691	IT	Voltri	37.1.3	Tyrrhenian	44.40833	8.76950	1	Bivalvia	Mytiloida	Mytilidae	Mytilus galloprovincialis	Mediterranean mussel	Mytgal	neritic epipelagic benthic	2.69	SLB	NA	NA	NA	NA	NA	NA	BaP	HMW	Pyrolitic	DW	NA	NA	0.0419	0.006285	NA	NA	40	Autumn 1999	01/09/1999	Autumn	W	Piccardo et al., 2001	2001	1999	4	0.030795727	0.004619359	NA	NA	4.01884E-06	0.014684932	0.0003	2.9
692	IT	Voltri	37.1.3	Tyrrhenian	44.40833	8.76950	1	Bivalvia	Mytiloida	Mytilidae	Mytilus galloprovincialis	Mediterranean mussel	Mytgal	neritic epipelagic benthic	2.69	SLB	NA	NA	NA	NA	NA	NA	BaP	HMW	Pyrolitic	DW	NA	NA	0.02	0.003	NA	NA	40	Autumn 1999	01/09/1999	Autumn	W	Piccardo et al., 2001	2001	1999	4	0.014699631	0.002204945	NA	NA	1.9183E-06	0.014684932	0.0003	2.9
693	IT	Voltri	37.1.3	Tyrrhenian	44.40833	8.76950	1	Bivalvia	Mytiloida	Mytilidae	Mytilus galloprovincialis	Mediterranean mussel	Mytgal	neritic epipelagic benthic	2.69	SLB	NA	NA	NA	NA	NA	NA	BbF	HMW	Pyrolitic	DW	NA	NA	0.0837	0.012555	NA	NA	40	Autumn 1999	01/09/1999	Autumn	W	Piccardo et al., 2001	2001	1999	4	NA	NA	NA	NA	3.32197E-06	0.014684932	NA	1.2
694	IT	Voltri	37.1.3	Tyrrhenian	44.40833	8.76950	1	Bivalvia	Mytiloida	Mytilidae	Mytilus galloprovincialis	Mediterranean mussel	Mytgal	neritic epipelagic benthic	2.69	SLB	NA	NA	NA	NA	NA	NA	BbF	HMW	Pyrolitic	DW	NA	NA	0.0467	0.007005	NA	NA	40	Autumn 1999	01/09/1999	Autumn	W	Piccardo et al., 2001	2001	1999	4	NA	NA	NA	NA	1.85348E-06	0.014684932	NA	1.2
695	IT	Voltri	37.1.3	Tyrrhenian	44.40833	8.76950	1	Bivalvia	Mytiloida	Mytilidae	Mytilus galloprovincialis	Mediterranean mussel	Mytgal	neritic epipelagic benthic	2.69	SLB	NA	NA	NA	NA	NA	NA	BghiP	HMW	Pyrolitic	DW	NA	NA	0.05	0.0075	NA	NA	40	Autumn 1999	01/09/1999	Autumn	W	Piccardo et al., 2001	2001	1999	4	NA	NA	NA	NA	NA	0.014684932	NA	NA
696	IT	Voltri	37.1.3	Tyrrhenian	44.40833	8.76950	1	Bivalvia	Mytiloida	Mytilidae	Mytilus galloprovincialis	Mediterranean mussel	Mytgal	neritic epipelagic benthic	2.69	SLB	NA	NA	NA	NA	NA	NA	BghiP	HMW	Pyrolitic	DW	NA	NA	0.0255	0.003825	NA	NA	40	Autumn 1999	01/09/1999	Autumn	W	Piccardo et al., 2001	2001	1999	4	NA	NA	NA	NA	NA	0.014684932	NA	NA
697	IT	Voltri	37.1.3	Tyrrhenian	44.40833	8.76950	1	Bivalvia	Mytiloida	Mytilidae	Mytilus galloprovincialis	Mediterranean mussel	Mytgal	neritic epipelagic benthic	2.69	SLB	NA	NA	NA	NA	NA	NA	BkF	HMW	Pyrolitic	DW	NA	NA	0.0382	0.00573	NA	NA	40	Autumn 1999	01/09/1999	Autumn	W	Piccardo et al., 2001	2001	1999	4	NA	NA	NA	NA	1.51612E-06	0.014684932	NA	1.2
698	IT	Voltri	37.1.3	Tyrrhenian	44.40833	8.76950	1	Bivalvia	Mytiloida	Mytilidae	Mytilus galloprovincialis	Mediterranean mussel	Mytgal	neritic epipelagic benthic	2.69	SLB	NA	NA	NA	NA	NA	NA	BkF	HMW	Pyrolitic	DW	NA	NA	0.0193	0.002895	NA	NA	40	Autumn 1999	01/09/1999	Autumn	W	Piccardo et al., 2001	2001	1999	4	NA	NA	NA	NA	7.65998E-07	0.014684932	NA	1.2
699	IT	Voltri	37.1.3	Tyrrhenian	44.40833	8.76950	1	Bivalvia	Mytiloida	Mytilidae	Mytilus galloprovincialis	Mediterranean mussel	Mytgal	neritic epipelagic benthic	2.69	SLB	NA	NA	NA	NA	NA	NA	Chr	HMW	Pyrolitic	DW	NA	NA	0.0988	0.01482	NA	NA	40	Autumn 1999	01/09/1999	Autumn	W	Piccardo et al., 2001	2001	1999	4	NA	NA	NA	NA	1.44256E-06	0.014684932	NA	0.441455329
700	IT	Voltri	37.1.3	Tyrrhenian	44.40833	8.76950	1	Bivalvia	Mytiloida	Mytilidae	Mytilus galloprovincialis	Mediterranean mussel	Mytgal	neritic epipelagic benthic	2.69	SLB	NA	NA	NA	NA	NA	NA	Chr	HMW	Pyrolitic	DW	NA	NA	0.045	0.00675	NA	NA	40	Autumn 1999	01/09/1999	Autumn	W	Piccardo et al., 2001	2001	1999	4	NA	NA	NA	NA	6.57035E-07	0.014684932	NA	0.441455329
701	IT	Voltri	37.1.3	Tyrrhenian	44.40833	8.76950	1	Bivalvia	Mytiloida	Mytilidae	Mytilus galloprovincialis	Mediterranean mussel	Mytgal	neritic epipelagic benthic	2.69	SLB	NA	NA	NA	NA	NA	NA	DahA	HMW	Pyrolitic	DW	NA	NA	0.0023	0.000345	NA	NA	40	Autumn 1999	01/09/1999	Autumn	W	Piccardo et al., 2001	2001	1999	4	NA	NA	NA	NA	3.11889E-07	0.014684932	NA	4.1
702	IT	Voltri	37.1.3	Tyrrhenian	44.40833	8.76950	1	Bivalvia	Mytiloida	Mytilidae	Mytilus galloprovincialis	Mediterranean mussel	Mytgal	neritic epipelagic benthic	2.69	SLB	NA	NA	NA	NA	NA	NA	DahA	HMW	Pyrolitic	DW	NA	NA	0.0015	0.000225	NA	NA	40	Autumn 1999	01/09/1999	Autumn	W	Piccardo et al., 2001	2001	1999	4	NA	NA	NA	NA	2.03406E-07	0.014684932	NA	4.1
703	IT	Voltri	37.1.3	Tyrrhenian	44.40833	8.76950	1	Bivalvia	Mytiloida	Mytilidae	Mytilus galloprovincialis	Mediterranean mussel	Mytgal	neritic epipelagic benthic	2.69	SLB	NA	NA	NA	NA	NA	NA	Flu	MMW	Pyrolitic	DW	NA	NA	0.1957	0.029355	NA	NA	40	Autumn 1999	01/09/1999	Autumn	W	Piccardo et al., 2001	2001	1999	4	0.001078769	0.000161815	NA	NA	NA	0.014684932	0.04	NA
704	IT	Voltri	37.1.3	Tyrrhenian	44.40833	8.76950	1	Bivalvia	Mytiloida	Mytilidae	Mytilus galloprovincialis	Mediterranean mussel	Mytgal	neritic epipelagic benthic	2.69	SLB	NA	NA	NA	NA	NA	NA	Flu	MMW	Pyrolitic	DW	NA	NA	0.0465	0.006975	NA	NA	40	Autumn 1999	01/09/1999	Autumn	W	Piccardo et al., 2001	2001	1999	4	0.000256325	3.84487E-05	NA	NA	NA	0.014684932	0.04	NA
705	IT	Voltri	37.1.3	Tyrrhenian	44.40833	8.76950	1	Bivalvia	Mytiloida	Mytilidae	Mytilus galloprovincialis	Mediterranean mussel	Mytgal	neritic epipelagic benthic	2.69	SLB	NA	NA	NA	NA	NA	NA	Phe	LMW	Petrogenic	DW	NA	NA	0.0213	0.003195	NA	NA	40	Autumn 1999	01/09/1999	Autumn	W	Piccardo et al., 2001	2001	1999	4	NA	NA	NA	NA	NA	0.014684932	NA	NA
706	IT	Voltri	37.1.3	Tyrrhenian	44.40833	8.76950	1	Bivalvia	Mytiloida	Mytilidae	Mytilus galloprovincialis	Mediterranean mussel	Mytgal	neritic epipelagic benthic	2.69	SLB	NA	NA	NA	NA	NA	NA	Phe	LMW	Petrogenic	DW	NA	NA	0.0045	0.000675	NA	NA	40	Autumn 1999	01/09/1999	Autumn	W	Piccardo et al., 2001	2001	1999	4	NA	NA	NA	NA	NA	0.014684932	NA	NA
707	IT	Voltri	37.1.3	Tyrrhenian	44.40833	8.76950	1	Bivalvia	Mytiloida	Mytilidae	Mytilus galloprovincialis	Mediterranean mussel	Mytgal	neritic epipelagic benthic	2.69	SLB	NA	NA	NA	NA	NA	NA	Pyr	MMW	Pyrolitic	DW	NA	NA	0.1028	0.01542	NA	NA	40	Autumn 1999	01/09/1999	Autumn	W	Piccardo et al., 2001	2001	1999	4	0.000755561	0.000113334	NA	NA	NA	0.014684932	0.03	NA
708	IT	Voltri	37.1.3	Tyrrhenian	44.40833	8.76950	1	Bivalvia	Mytiloida	Mytilidae	Mytilus galloprovincialis	Mediterranean mussel	Mytgal	neritic epipelagic benthic	2.69	SLB	NA	NA	NA	NA	NA	NA	Pyr	MMW	Pyrolitic	DW	NA	NA	0.0306	0.00459	NA	NA	40	Autumn 1999	01/09/1999	Autumn	W	Piccardo et al., 2001	2001	1999	4	0.000224904	3.37357E-05	NA	NA	NA	0.014684932	0.03	NA
709	IT	Brindisi	37.2.2	Adriatic	40.72062	17.92189	2	Bivalvia	Mytiloida	Mytilidae	Mytilus galloprovincialis	Mediterranean mussel	Mytgal	neritic epipelagic benthic	2.69	SLB	NA	4.26	NA	NA	NA	SO	PAH16	NA	NA	WW	NA	NA	0.0083	0.0083	NA	NA	NA	Spring 2000	01/03/2000	Spring	W	Corsi et al., 2002	2002	2000	5	NA	NA	NA	NA	NA	0.014684932	NA	NA
710	IT	Brindisi	37.2.2	Adriatic	40.72062	17.92189	2	Actinopterygii	Perciformes	Mullidae	Mullus barbatus	Red mullet	Mulbar	neritic mesopelagic demersal	3.24	FB	NA	NA	NA	NA	NA	MU	PAH16	NA	NA	WW	NA	NA	0.00228	0.00228	NA	NA	NA	Spring 2000	01/03/2000	Spring	W	Corsi et al., 2002	2002	2000	5	NA	NA	NA	NA	NA	0.021287671	NA	NA
711	IT	Castro	37.2.2	Ionian	39.98406	18.44548	2	Bivalvia	Mytiloida	Mytilidae	Mytilus galloprovincialis	Mediterranean mussel	Mytgal	neritic epipelagic benthic	2.69	SLB	NA	NA	NA	NA	NA	SO	PAH16	NA	NA	WW	NA	NA	0.02766	0.02766	NA	NA	NA	Spring 2000	01/03/2000	Spring	W	Corsi et al., 2002	2002	2000	5	NA	NA	NA	NA	NA	0.014684932	NA	NA
712	IT	Castro	37.2.2	Ionian	39.98406	18.44548	2	Actinopterygii	Perciformes	Mullidae	Mullus barbatus	Red mullet	Mulbar	neritic mesopelagic demersal	3.24	FB	NA	NA	NA	NA	NA	MU	PAH16	NA	NA	WW	NA	NA	0.00405	0.00405	NA	NA	NA	Spring 2000	01/03/2000	Spring	W	Corsi et al., 2002	2002	2000	5	NA	NA	NA	NA	NA	0.021287671	NA	NA
713	IT	Cerano	37.2.2	Adriatic	40.58032	18.06034	2	Bivalvia	Mytiloida	Mytilidae	Mytilus galloprovincialis	Mediterranean mussel	Mytgal	neritic epipelagic benthic	2.69	SLB	NA	2.53	NA	NA	NA	SO	PAH16	NA	NA	WW	NA	NA	0.00728	0.00728	NA	NA	NA	Spring 2000	01/03/2000	Spring	W	Corsi et al., 2002	2002	2000	5	NA	NA	NA	NA	NA	0.014684932	NA	NA
714	IT	Cerano	37.2.2	Adriatic	40.58032	18.06034	2	Actinopterygii	Perciformes	Mullidae	Mullus barbatus	Red mullet	Mulbar	neritic mesopelagic demersal	3.24	FB	NA	NA	NA	NA	NA	MU	PAH16	NA	NA	WW	NA	NA	0.00415	0.00415	NA	NA	NA	Spring 2000	01/03/2000	Spring	W	Corsi et al., 2002	2002	2000	5	NA	NA	NA	NA	NA	0.021287671	NA	NA
715	IT	Cesine	37.2.2	Adriatic	40.41214	18.30646	2	Bivalvia	Mytiloida	Mytilidae	Mytilus galloprovincialis	Mediterranean mussel	Mytgal	neritic epipelagic benthic	2.69	SLB	NA	NA	NA	NA	NA	SO	PAH16	NA	NA	WW	NA	NA	0.00753	0.00753	NA	NA	NA	Spring 2000	01/03/2000	Spring	W	Corsi et al., 2002	2002	2000	5	NA	NA	NA	NA	NA	0.014684932	NA	NA
716	IT	Cesine	37.2.2	Adriatic	40.41214	18.30646	2	Actinopterygii	Perciformes	Mullidae	Mullus barbatus	Red mullet	Mulbar	neritic mesopelagic demersal	3.24	FB	NA	NA	NA	NA	NA	MU	PAH16	NA	NA	WW	NA	NA	0.00666	0.00666	NA	NA	NA	Spring 2000	01/03/2000	Spring	W	Corsi et al., 2002	2002	2000	5	NA	NA	NA	NA	NA	0.021287671	NA	NA
717	IT	Gallipoli	37.2.2	Ionian	40.10038	17.86944	2	Bivalvia	Mytiloida	Mytilidae	Mytilus galloprovincialis	Mediterranean mussel	Mytgal	neritic epipelagic benthic	2.69	SLB	NA	NA	NA	NA	NA	SO	PAH16	NA	NA	WW	NA	NA	0.00434	0.00434	NA	NA	NA	Spring 2000	01/03/2000	Spring	W	Corsi et al., 2002	2002	2000	5	NA	NA	NA	NA	NA	0.014684932	NA	NA
718	IT	Gallipoli	37.2.2	Ionian	40.10038	17.86944	2	Actinopterygii	Perciformes	Mullidae	Mullus barbatus	Red mullet	Mulbar	neritic mesopelagic demersal	3.24	FB	NA	NA	NA	NA	NA	MU	PAH16	NA	NA	WW	NA	NA	0.00303	0.00303	NA	NA	NA	Spring 2000	01/03/2000	Spring	W	Corsi et al., 2002	2002	2000	5	NA	NA	NA	NA	NA	0.021287671	NA	NA
719	IT	Otranto	37.2.2	Adriatic	40.17664	18.50958	2	Bivalvia	Mytiloida	Mytilidae	Mytilus galloprovincialis	Mediterranean mussel	Mytgal	neritic epipelagic benthic	2.69	SLB	NA	NA	NA	NA	NA	SO	PAH16	NA	NA	WW	NA	NA	0.00318	0.00318	NA	NA	NA	Spring 2000	01/03/2000	Spring	W	Corsi et al., 2002	2002	2000	5	NA	NA	NA	NA	NA	0.014684932	NA	NA
720	IT	Otranto	37.2.2	Adriatic	40.17664	18.50958	2	Actinopterygii	Perciformes	Mullidae	Mullus barbatus	Red mullet	Mulbar	neritic mesopelagic demersal	3.24	FB	NA	19.95	NA	NA	NA	MU	PAH16	NA	NA	WW	NA	NA	0.00302	0.00302	NA	NA	NA	Spring 2000	01/03/2000	Spring	W	Corsi et al., 2002	2002	2000	5	NA	NA	NA	NA	NA	0.021287671	NA	NA
721	IT	Porto Cesareo	37.2.2	Ionian	40.27885	17.75125	2	Bivalvia	Mytiloida	Mytilidae	Mytilus galloprovincialis	Mediterranean mussel	Mytgal	neritic epipelagic benthic	2.69	SLB	NA	NA	NA	NA	NA	SO	PAH16	NA	NA	WW	NA	NA	0.02711	0.02711	NA	NA	NA	Spring 2000	01/03/2000	Spring	W	Corsi et al., 2002	2002	2000	5	NA	NA	NA	NA	NA	0.014684932	NA	NA
722	IT	Porto Cesareo	37.2.2	Ionian	40.27885	17.75125	2	Actinopterygii	Perciformes	Mullidae	Mullus barbatus	Red mullet	Mulbar	neritic mesopelagic demersal	3.24	FB	NA	17.09	NA	NA	NA	MU	PAH16	NA	NA	WW	NA	NA	0.00374	0.00374	NA	NA	NA	Spring 2000	01/03/2000	Spring	W	Corsi et al., 2002	2002	2000	5	NA	NA	NA	NA	NA	0.021287671	NA	NA
723	IT	Torre Guaceto	37.2.2	Adriatic	40.79299	17.69871	2	Bivalvia	Mytiloida	Mytilidae	Mytilus galloprovincialis	Mediterranean mussel	Mytgal	neritic epipelagic benthic	2.69	SLB	NA	NA	NA	NA	NA	SO	PAH16	NA	NA	WW	NA	NA	0.01311	0.01311	NA	NA	NA	Spring 2000	01/03/2000	Spring	W	Corsi et al., 2002	2002	2000	5	NA	NA	NA	NA	NA	0.014684932	NA	NA
724	IT	Torre Guaceto	37.2.2	Adriatic	40.79299	17.69871	2	Actinopterygii	Perciformes	Mullidae	Mullus barbatus	Red mullet	Mulbar	neritic mesopelagic demersal	3.24	FB	NA	17.09	NA	NA	NA	MU	PAH16	NA	NA	WW	NA	NA	0.00311	0.00311	NA	NA	NA	Spring 2000	01/03/2000	Spring	W	Corsi et al., 2002	2002	2000	5	NA	NA	NA	NA	NA	0.021287671	NA	NA
725	IT	Campi Flegrei Bay	37.1.3	Tyrrhenian	40.81933	14.09158	3	Bivalvia	Mytiloida	Mytilidae	Mytilus galloprovincialis	Mediterranean mussel	Mytgal	neritic epipelagic benthic	2.69	SLB	NA	NA	NA	NA	NA	MU	PAH16	NA	NA	WW	NA	NA	NA	NA	0.105	0.831	NA	January 1998-December 1999	01/01/1999	NA	W	Amoroso et al., 2003	2003	1999	6	NA	NA	NA	NA	NA	0.014684932	NA	NA
726	IT	Campi Flegrei Bay	37.1.3	Tyrrhenian	40.81933	14.09158	3	Bivalvia	Mytiloida	Mytilidae	Mytilus galloprovincialis	Mediterranean mussel	Mytgal	neritic epipelagic benthic	2.69	SLB	NA	NA	NA	NA	NA	MU	PAH16	NA	NA	WW	NA	NA	NA	NA	0.016	0.627	NA	January 2000-December 2001	01/01/2000	NA	W	Amoroso et al., 2003	2003	2000	6	NA	NA	NA	NA	NA	0.014684932	NA	NA
727	IT	Piallassa Baiona Lagoon (Ravenna)	37.2.1	Adriatic	44.49373	12.26147	2	Bivalvia	Veneroida	Veneridae	Ruditapes philippinarum	Manila clam	Rudphi	neritic epipelagic benthic	2	SLB	NA	>20	NA	NA	NA	SO	Ant	LMW	Petrogenic	DW	NA	NA	<LOD	NA	NA	NA	NA	Summer 2001	21/06/2001	Summer	W	Vassura et al., 2005	2005	2001	7	NA	NA	NA	NA	NA	0.014684932	0.3	NA
728	IT	Piallassa Baiona Lagoon (Ravenna)	37.2.1	Adriatic	44.47676	12.25090	2	Bivalvia	Veneroida	Veneridae	Ruditapes philippinarum	Manila clam	Rudphi	neritic epipelagic benthic	2	SLB	NA	>20	NA	NA	NA	SO	Ant	LMW	Petrogenic	DW	NA	NA	<LOD	NA	NA	NA	NA	Summer 2001	21/06/2001	Summer	W	Vassura et al., 2005	2005	2001	7	NA	NA	NA	NA	NA	0.014684932	0.3	NA
729	IT	Piallassa Baiona Lagoon (Ravenna)	37.2.1	Adriatic	44.49373	12.26147	2	Bivalvia	Veneroida	Veneridae	Ruditapes philippinarum	Manila clam	Rudphi	neritic epipelagic benthic	2	SLB	NA	>20	NA	NA	NA	SO	BaA	HMW	Pyrolitic	DW	NA	NA	0.003	0.00045	NA	NA	NA	Summer 2001	21/06/2001	Summer	W	Vassura et al., 2005	2005	2001	7	NA	NA	NA	NA	1.19067E-07	0.014684932	NA	1.2
730	IT	Piallassa Baiona Lagoon (Ravenna)	37.2.1	Adriatic	44.47676	12.25090	2	Bivalvia	Veneroida	Veneridae	Ruditapes philippinarum	Manila clam	Rudphi	neritic epipelagic benthic	2	SLB	NA	>20	NA	NA	NA	SO	BaA	HMW	Pyrolitic	DW	NA	NA	0.009	0.00135	NA	NA	NA	Summer 2001	21/06/2001	Summer	W	Vassura et al., 2005	2005	2001	7	NA	NA	NA	NA	3.57201E-07	0.014684932	NA	1.2
731	IT	Piallassa Baiona Lagoon (Ravenna)	37.2.1	Adriatic	44.49373	12.26147	2	Bivalvia	Veneroida	Veneridae	Ruditapes philippinarum	Manila clam	Rudphi	neritic epipelagic benthic	2	SLB	NA	>20	NA	NA	NA	SO	BaP	HMW	Pyrolitic	DW	NA	NA	0.001	0.00015	NA	NA	NA	Summer 2001	21/06/2001	Summer	W	Vassura et al., 2005	2005	2001	7	0.000734982	0.000110247	NA	NA	9.59151E-08	0.014684932	0.0003	2.9
732	IT	Piallassa Baiona Lagoon (Ravenna)	37.2.1	Adriatic	44.47676	12.25090	2	Bivalvia	Veneroida	Veneridae	Ruditapes philippinarum	Manila clam	Rudphi	neritic epipelagic benthic	2	SLB	NA	>20	NA	NA	NA	SO	BaP	HMW	Pyrolitic	DW	NA	NA	0.001	0.00015	NA	NA	NA	Summer 2001	21/06/2001	Summer	W	Vassura et al., 2005	2005	2001	7	0.000734982	0.000110247	NA	NA	9.59151E-08	0.014684932	0.0003	2.9
733	IT	Piallassa Baiona Lagoon (Ravenna)	37.2.1	Adriatic	44.49373	12.26147	2	Bivalvia	Veneroida	Veneridae	Ruditapes philippinarum	Manila clam	Rudphi	neritic epipelagic benthic	2	SLB	NA	>20	NA	NA	NA	SO	BbF	HMW	Pyrolitic	DW	NA	NA	<LOD	NA	NA	NA	NA	Summer 2001	21/06/2001	Summer	W	Vassura et al., 2005	2005	2001	7	NA	NA	NA	NA	NA	0.014684932	NA	1.2
734	IT	Piallassa Baiona Lagoon (Ravenna)	37.2.1	Adriatic	44.47676	12.25090	2	Bivalvia	Veneroida	Veneridae	Ruditapes philippinarum	Manila clam	Rudphi	neritic epipelagic benthic	2	SLB	NA	>20	NA	NA	NA	SO	BbF	HMW	Pyrolitic	DW	NA	NA	<LOD	NA	NA	NA	NA	Summer 2001	21/06/2001	Summer	W	Vassura et al., 2005	2005	2001	7	NA	NA	NA	NA	NA	0.014684932	NA	1.2
735	IT	Piallassa Baiona Lagoon (Ravenna)	37.2.1	Adriatic	44.49373	12.26147	2	Bivalvia	Veneroida	Veneridae	Ruditapes philippinarum	Manila clam	Rudphi	neritic epipelagic benthic	2	SLB	NA	>20	NA	NA	NA	SO	BghiP	HMW	Pyrolitic	DW	NA	NA	0.001	0.00015	NA	NA	NA	Summer 2001	21/06/2001	Summer	W	Vassura et al., 2005	2005	2001	7	NA	NA	NA	NA	NA	0.014684932	NA	NA
736	IT	Piallassa Baiona Lagoon (Ravenna)	37.2.1	Adriatic	44.47676	12.25090	2	Bivalvia	Veneroida	Veneridae	Ruditapes philippinarum	Manila clam	Rudphi	neritic epipelagic benthic	2	SLB	NA	>20	NA	NA	NA	SO	BghiP	HMW	Pyrolitic	DW	NA	NA	0.004	0.0006	NA	NA	NA	Summer 2001	21/06/2001	Summer	W	Vassura et al., 2005	2005	2001	7	NA	NA	NA	NA	NA	0.014684932	NA	NA
737	IT	Piallassa Baiona Lagoon (Ravenna)	37.2.1	Adriatic	44.49373	12.26147	2	Bivalvia	Veneroida	Veneridae	Ruditapes philippinarum	Manila clam	Rudphi	neritic epipelagic benthic	2	SLB	NA	>20	NA	NA	NA	SO	BkF	HMW	Pyrolitic	DW	NA	NA	<LOD	NA	NA	NA	NA	Summer 2001	21/06/2001	Summer	W	Vassura et al., 2005	2005	2001	7	NA	NA	NA	NA	NA	0.014684932	NA	1.2
738	IT	Piallassa Baiona Lagoon (Ravenna)	37.2.1	Adriatic	44.47676	12.25090	2	Bivalvia	Veneroida	Veneridae	Ruditapes philippinarum	Manila clam	Rudphi	neritic epipelagic benthic	2	SLB	NA	>20	NA	NA	NA	SO	BkF	HMW	Pyrolitic	DW	NA	NA	<LOD	NA	NA	NA	NA	Summer 2001	21/06/2001	Summer	W	Vassura et al., 2005	2005	2001	7	NA	NA	NA	NA	NA	0.014684932	NA	1.2
739	IT	Piallassa Baiona Lagoon (Ravenna)	37.2.1	Adriatic	44.49373	12.26147	2	Bivalvia	Veneroida	Veneridae	Ruditapes philippinarum	Manila clam	Rudphi	neritic epipelagic benthic	2	SLB	NA	>20	NA	NA	NA	SO	Chr	HMW	Pyrolitic	DW	NA	NA	0.002	0.0003	NA	NA	NA	Summer 2001	21/06/2001	Summer	W	Vassura et al., 2005	2005	2001	7	NA	NA	NA	NA	2.92015E-08	0.014684932	NA	0.441455329
740	IT	Piallassa Baiona Lagoon (Ravenna)	37.2.1	Adriatic	44.47676	12.25090	2	Bivalvia	Veneroida	Veneridae	Ruditapes philippinarum	Manila clam	Rudphi	neritic epipelagic benthic	2	SLB	NA	>20	NA	NA	NA	SO	Chr	HMW	Pyrolitic	DW	NA	NA	0.004	0.0006	NA	NA	NA	Summer 2001	21/06/2001	Summer	W	Vassura et al., 2005	2005	2001	7	NA	NA	NA	NA	5.84031E-08	0.014684932	NA	0.441455329
741	IT	Piallassa Baiona Lagoon (Ravenna)	37.2.1	Adriatic	44.49373	12.26147	2	Bivalvia	Veneroida	Veneridae	Ruditapes philippinarum	Manila clam	Rudphi	neritic epipelagic benthic	2	SLB	NA	>20	NA	NA	NA	SO	DahA	HMW	Pyrolitic	DW	NA	NA	<LOD	NA	NA	NA	NA	Summer 2001	21/06/2001	Summer	W	Vassura et al., 2005	2005	2001	7	NA	NA	NA	NA	NA	0.014684932	NA	4.1
742	IT	Piallassa Baiona Lagoon (Ravenna)	37.2.1	Adriatic	44.47676	12.25090	2	Bivalvia	Veneroida	Veneridae	Ruditapes philippinarum	Manila clam	Rudphi	neritic epipelagic benthic	2	SLB	NA	>20	NA	NA	NA	SO	DahA	HMW	Pyrolitic	DW	NA	NA	<LOD	NA	NA	NA	NA	Summer 2001	21/06/2001	Summer	W	Vassura et al., 2005	2005	2001	7	NA	NA	NA	NA	NA	0.014684932	NA	4.1
743	IT	Piallassa Baiona Lagoon (Ravenna)	37.2.1	Adriatic	44.49373	12.26147	2	Bivalvia	Veneroida	Veneridae	Ruditapes philippinarum	Manila clam	Rudphi	neritic epipelagic benthic	2	SLB	NA	>20	NA	NA	NA	SO	Flu	MMW	Pyrolitic	DW	NA	NA	0.033	0.00495	NA	NA	NA	Summer 2001	21/06/2001	Summer	W	Vassura et al., 2005	2005	2001	7	0.000181908	2.72862E-05	NA	NA	NA	0.014684932	0.04	NA
744	IT	Piallassa Baiona Lagoon (Ravenna)	37.2.1	Adriatic	44.47676	12.25090	2	Bivalvia	Veneroida	Veneridae	Ruditapes philippinarum	Manila clam	Rudphi	neritic epipelagic benthic	2	SLB	NA	>20	NA	NA	NA	SO	Flu	MMW	Pyrolitic	DW	NA	NA	0.038	0.0057	NA	NA	NA	Summer 2001	21/06/2001	Summer	W	Vassura et al., 2005	2005	2001	7	0.00020947	3.14205E-05	NA	NA	NA	0.014684932	0.04	NA
745	IT	Piallassa Baiona Lagoon (Ravenna)	37.2.1	Adriatic	44.49373	12.26147	2	Bivalvia	Veneroida	Veneridae	Ruditapes philippinarum	Manila clam	Rudphi	neritic epipelagic benthic	2	SLB	NA	>20	NA	NA	NA	SO	Phe	LMW	Petrogenic	DW	NA	NA	0.022	0.0033	NA	NA	NA	Summer 2001	21/06/2001	Summer	W	Vassura et al., 2005	2005	2001	7	NA	NA	NA	NA	NA	0.014684932	NA	NA
746	IT	Piallassa Baiona Lagoon (Ravenna)	37.2.1	Adriatic	44.47676	12.25090	2	Bivalvia	Veneroida	Veneridae	Ruditapes philippinarum	Manila clam	Rudphi	neritic epipelagic benthic	2	SLB	NA	>20	NA	NA	NA	SO	Phe	LMW	Petrogenic	DW	NA	NA	0.022	0.0033	NA	NA	NA	Summer 2001	21/06/2001	Summer	W	Vassura et al., 2005	2005	2001	7	NA	NA	NA	NA	NA	0.014684932	NA	NA
747	IT	Piallassa Baiona Lagoon (Ravenna)	37.2.1	Adriatic	44.49373	12.26147	2	Bivalvia	Veneroida	Veneridae	Ruditapes philippinarum	Manila clam	Rudphi	neritic epipelagic benthic	2	SLB	NA	>20	NA	NA	NA	SO	Pyr	MMW	Pyrolitic	DW	NA	NA	0.039	0.00585	NA	NA	NA	Summer 2001	21/06/2001	Summer	W	Vassura et al., 2005	2005	2001	7	0.000286643	4.29964E-05	NA	NA	NA	0.014684932	0.03	NA
748	IT	Piallassa Baiona Lagoon (Ravenna)	37.2.1	Adriatic	44.47676	12.25090	2	Bivalvia	Veneroida	Veneridae	Ruditapes philippinarum	Manila clam	Rudphi	neritic epipelagic benthic	2	SLB	NA	>20	NA	NA	NA	SO	Pyr	MMW	Pyrolitic	DW	NA	NA	0.054	0.0081	NA	NA	NA	Summer 2001	21/06/2001	Summer	W	Vassura et al., 2005	2005	2001	7	0.00039689	5.95335E-05	NA	NA	NA	0.014684932	0.03	NA
749	IT	Adriatic sea	37.2.1	Adriatic	44.50282	12.69014	3	Bivalvia	Mytiloida	Mytilidae	Mytilus galloprovincialis	Mediterranean mussel	Mytgal	neritic epipelagic benthic	2.69	SLB	NA	5.5	NA	NA	NA	SO	1MeNap	LMW	Petrogenic	DW	0.003	NA	0.01	0.0015	NA	NA	90	September 2003	01/09/2003	Summer	W	Fabbri et al., 2006	2006	2003	8	NA	NA	NA	NA	NA	0.014684932	NA	NA
750	IT	Adriatic sea	37.2.1	Adriatic	44.50282	12.69014	3	Bivalvia	Mytiloida	Mytilidae	Mytilus galloprovincialis	Mediterranean mussel	Mytgal	neritic epipelagic benthic	2.69	SLB	NA	5.5	NA	NA	NA	SO	2MeNap	LMW	Petrogenic	DW	0.003	NA	0.02	0.003	NA	NA	90	September 2003	01/09/2003	Summer	W	Fabbri et al., 2006	2006	2003	8	NA	NA	NA	NA	NA	0.014684932	NA	NA
751	IT	Adriatic sea	37.2.1	Adriatic	44.50282	12.69014	3	Bivalvia	Mytiloida	Mytilidae	Mytilus galloprovincialis	Mediterranean mussel	Mytgal	neritic epipelagic benthic	2.69	SLB	NA	5.5	NA	NA	NA	SO	Ace	LMW	Petrogenic	DW	0.003	NA	0.0046	0.00069	NA	NA	90	September 2003	01/09/2003	Summer	W	Fabbri et al., 2006	2006	2003	8	1.69046E-05	2.53569E-06	NA	NA	NA	0.014684932	0.06	NA
752	IT	Adriatic sea	37.2.1	Adriatic	44.50282	12.69014	3	Bivalvia	Mytiloida	Mytilidae	Mytilus galloprovincialis	Mediterranean mussel	Mytgal	neritic epipelagic benthic	2.69	SLB	NA	5.5	NA	NA	NA	SO	Acy	LMW	Petrogenic	DW	0.003	NA	0.0032	0.00048	NA	NA	90	September 2003	01/09/2003	Summer	W	Fabbri et al., 2006	2006	2003	8	NA	NA	NA	NA	NA	0.014684932	NA	NA
753	IT	Adriatic sea	37.2.1	Adriatic	44.50282	12.69014	3	Bivalvia	Mytiloida	Mytilidae	Mytilus galloprovincialis	Mediterranean mussel	Mytgal	neritic epipelagic benthic	2.69	SLB	NA	5.5	NA	NA	NA	SO	Ant	LMW	Petrogenic	DW	0.003	NA	0.017	0.00255	NA	NA	90	September 2003	01/09/2003	Summer	W	Fabbri et al., 2006	2006	2003	8	1.24947E-05	1.8742E-06	NA	NA	NA	0.014684932	0.3	NA
754	IT	Adriatic sea	37.2.1	Adriatic	44.50282	12.69014	3	Bivalvia	Mytiloida	Mytilidae	Mytilus galloprovincialis	Mediterranean mussel	Mytgal	neritic epipelagic benthic	2.69	SLB	NA	5.5	NA	NA	NA	SO	BaP	HMW	Pyrolitic	DW	0.003	NA	<0,005	0.000375	NA	NA	90	September 2003	01/09/2003	Summer	W	Fabbri et al., 2006	2006	2003	8	NA	0.000275618	NA	NA	2.39788E-07	0.014684932	0.0003	2.9
755	IT	Adriatic sea	37.2.1	Adriatic	44.50282	12.69014	3	Bivalvia	Mytiloida	Mytilidae	Mytilus galloprovincialis	Mediterranean mussel	Mytgal	neritic epipelagic benthic	2.69	SLB	NA	5.5	NA	NA	NA	SO	BbF+BkF	HMW	Pyrolitic	DW	0.003	NA	<0,005	0.000375	NA	NA	90	September 2003	01/09/2003	Summer	W	Fabbri et al., 2006	2006	2003	8	NA	NA	NA	NA	NA	0.014684932	NA	NA
756	IT	Adriatic sea	37.2.1	Adriatic	44.50282	12.69014	3	Bivalvia	Mytiloida	Mytilidae	Mytilus galloprovincialis	Mediterranean mussel	Mytgal	neritic epipelagic benthic	2.69	SLB	NA	5.5	NA	NA	NA	SO	BghiFlu	HMW	Pyrolitic	DW	0.003	NA	<0,003	0.000225	NA	NA	90	September 2003	01/09/2003	Summer	W	Fabbri et al., 2006	2006	2003	8	NA	NA	NA	NA	NA	0.014684932	NA	NA
757	IT	Adriatic sea	37.2.1	Adriatic	44.50282	12.69014	3	Bivalvia	Mytiloida	Mytilidae	Mytilus galloprovincialis	Mediterranean mussel	Mytgal	neritic epipelagic benthic	2.69	SLB	NA	5.5	NA	NA	NA	SO	BghiP	HMW	Pyrolitic	DW	0.003	NA	<0,01	0.00075	NA	NA	90	September 2003	01/09/2003	Summer	W	Fabbri et al., 2006	2006	2003	8	NA	NA	NA	NA	NA	0.014684932	NA	NA
758	IT	Adriatic sea	37.2.1	Adriatic	44.50282	12.69014	3	Bivalvia	Mytiloida	Mytilidae	Mytilus galloprovincialis	Mediterranean mussel	Mytgal	neritic epipelagic benthic	2.69	SLB	NA	5.5	NA	NA	NA	SO	CcdPyr	HMW	Pyrolitic	DW	0.003	NA	<0,003	0.000225	NA	NA	90	September 2003	01/09/2003	Summer	W	Fabbri et al., 2006	2006	2003	8	NA	NA	NA	NA	NA	0.014684932	NA	NA
759	IT	Adriatic sea	37.2.1	Adriatic	44.50282	12.69014	3	Bivalvia	Mytiloida	Mytilidae	Mytilus galloprovincialis	Mediterranean mussel	Mytgal	neritic epipelagic benthic	2.69	SLB	NA	5.5	NA	NA	NA	SO	Chr+BaA	HMW	Pyrolitic	DW	0.003	NA	<0,003	0.000225	NA	NA	90	September 2003	01/09/2003	Summer	W	Fabbri et al., 2006	2006	2003	8	NA	NA	NA	NA	NA	0.014684932	NA	NA
760	IT	Adriatic sea	37.2.1	Adriatic	44.50282	12.69014	3	Bivalvia	Mytiloida	Mytilidae	Mytilus galloprovincialis	Mediterranean mussel	Mytgal	neritic epipelagic benthic	2.69	SLB	NA	5.5	NA	NA	NA	SO	Fl	LMW	Petrogenic	DW	0.003	NA	0.019	0.00285	NA	NA	90	September 2003	01/09/2003	Summer	W	Fabbri et al., 2006	2006	2003	8	0.000104735	1.57102E-05	NA	NA	NA	0.014684932	0.04	NA
761	IT	Adriatic sea	37.2.1	Adriatic	44.50282	12.69014	3	Bivalvia	Mytiloida	Mytilidae	Mytilus galloprovincialis	Mediterranean mussel	Mytgal	neritic epipelagic benthic	2.69	SLB	NA	5.5	NA	NA	NA	SO	Flu	MMW	Pyrolitic	DW	0.003	NA	0.018	0.0027	NA	NA	90	September 2003	01/09/2003	Summer	W	Fabbri et al., 2006	2006	2003	8	9.92225E-05	1.48834E-05	NA	NA	NA	0.014684932	0.04	NA
762	IT	Adriatic sea	37.2.1	Adriatic	44.50282	12.69014	3	Bivalvia	Mytiloida	Mytilidae	Mytilus galloprovincialis	Mediterranean mussel	Mytgal	neritic epipelagic benthic	2.69	SLB	NA	5.5	NA	NA	NA	SO	Nap	LMW	Petrogenic	DW	0.003	NA	0.03	0.0045	NA	NA	90	September 2003	01/09/2003	Summer	W	Fabbri et al., 2006	2006	2003	8	0.000330742	4.96113E-05	NA	NA	4.38023E-07	0.014684932	0.02	0.441455329
763	IT	Adriatic sea	37.2.1	Adriatic	44.50282	12.69014	3	Bivalvia	Mytiloida	Mytilidae	Mytilus galloprovincialis	Mediterranean mussel	Mytgal	neritic epipelagic benthic	2.69	SLB	NA	5.5	NA	NA	NA	SO	Phe	LMW	Petrogenic	DW	0.003	NA	0.1	0.015	NA	NA	90	September 2003	01/09/2003	Summer	W	Fabbri et al., 2006	2006	2003	8	NA	NA	NA	NA	NA	0.014684932	NA	NA
764	IT	Adriatic sea	37.2.1	Adriatic	44.50282	12.69014	3	Bivalvia	Mytiloida	Mytilidae	Mytilus galloprovincialis	Mediterranean mussel	Mytgal	neritic epipelagic benthic	2.69	SLB	NA	5.5	NA	NA	NA	SO	Pyr	MMW	Pyrolitic	DW	0.003	NA	0.011	0.00165	NA	NA	90	September 2003	01/09/2003	Summer	W	Fabbri et al., 2006	2006	2003	8	8.0848E-05	1.21272E-05	NA	NA	NA	0.014684932	0.03	NA
765	IT	Piallassa Baiona Lagoon (Ravenna)	37.2.1	Adriatic	44.49814	12.25820	2	Bivalvia	Mytiloida	Mytilidae	Mytilus galloprovincialis	Mediterranean mussel	Mytgal	neritic epipelagic benthic	2.69	SLB	NA	5.5	NA	NA	NA	SO	1MeNap	LMW	Petrogenic	DW	0.003	NA	0.015	0.00225	NA	NA	450	23 September - 23 October 2003	23/10/2003	Autumn	T	Fabbri et al., 2006	2006	2003	8	NA	NA	NA	NA	NA	0.014684932	NA	NA
766	IT	Piallassa Baiona Lagoon (Ravenna)	37.2.1	Adriatic	44.48870	12.25717	2	Bivalvia	Mytiloida	Mytilidae	Mytilus galloprovincialis	Mediterranean mussel	Mytgal	neritic epipelagic benthic	2.69	SLB	NA	5.5	NA	NA	NA	SO	1MeNap	LMW	Petrogenic	DW	0.003	NA	0.0051	0.000765	NA	NA	450	23 September - 23 October 2003	23/10/2003	Autumn	T	Fabbri et al., 2006	2006	2003	8	NA	NA	NA	NA	NA	0.014684932	NA	NA
767	IT	Piallassa Baiona Lagoon (Ravenna)	37.2.1	Adriatic	44.51671	12.25571	2	Bivalvia	Mytiloida	Mytilidae	Mytilus galloprovincialis	Mediterranean mussel	Mytgal	neritic epipelagic benthic	2.69	SLB	NA	5.5	NA	NA	NA	SO	1MeNap	LMW	Petrogenic	DW	0.003	NA	0.0089	0.001335	NA	NA	450	23 September - 23 October 2003	23/10/2003	Autumn	T	Fabbri et al., 2006	2006	2003	8	NA	NA	NA	NA	NA	0.014684932	NA	NA
768	IT	Piallassa Baiona Lagoon (Ravenna)	37.2.1	Adriatic	44.49814	12.25820	2	Bivalvia	Mytiloida	Mytilidae	Mytilus galloprovincialis	Mediterranean mussel	Mytgal	neritic epipelagic benthic	2.69	SLB	NA	5.5	NA	NA	NA	SO	2MeNap	LMW	Petrogenic	DW	0.003	NA	0.024	0.0036	NA	NA	450	23 September - 23 October 2003	23/10/2003	Autumn	T	Fabbri et al., 2006	2006	2003	8	NA	NA	NA	NA	NA	0.014684932	NA	NA
769	IT	Piallassa Baiona Lagoon (Ravenna)	37.2.1	Adriatic	44.48870	12.25717	2	Bivalvia	Mytiloida	Mytilidae	Mytilus galloprovincialis	Mediterranean mussel	Mytgal	neritic epipelagic benthic	2.69	SLB	NA	5.5	NA	NA	NA	SO	2MeNap	LMW	Petrogenic	DW	0.003	NA	0.0078	0.00117	NA	NA	450	23 September - 23 October 2003	23/10/2003	Autumn	T	Fabbri et al., 2006	2006	2003	8	NA	NA	NA	NA	NA	0.014684932	NA	NA
770	IT	Piallassa Baiona Lagoon (Ravenna)	37.2.1	Adriatic	44.51671	12.25571	2	Bivalvia	Mytiloida	Mytilidae	Mytilus galloprovincialis	Mediterranean mussel	Mytgal	neritic epipelagic benthic	2.69	SLB	NA	5.5	NA	NA	NA	SO	2MeNap	LMW	Petrogenic	DW	0.003	NA	0.017	0.00255	NA	NA	450	23 September - 23 October 2003	23/10/2003	Autumn	T	Fabbri et al., 2006	2006	2003	8	NA	NA	NA	NA	NA	0.014684932	NA	NA
771	IT	Piallassa Baiona Lagoon (Ravenna)	37.2.1	Adriatic	44.49814	12.25820	2	Bivalvia	Mytiloida	Mytilidae	Mytilus galloprovincialis	Mediterranean mussel	Mytgal	neritic epipelagic benthic	2.69	SLB	NA	5.5	NA	NA	NA	SO	Ace	LMW	Petrogenic	DW	0.003	NA	0.005	0.00075	NA	NA	450	23 September - 23 October 2003	23/10/2003	Autumn	T	Fabbri et al., 2006	2006	2003	8	1.83745E-05	2.75618E-06	NA	NA	NA	0.014684932	0.06	NA
772	IT	Piallassa Baiona Lagoon (Ravenna)	37.2.1	Adriatic	44.48870	12.25717	2	Bivalvia	Mytiloida	Mytilidae	Mytilus galloprovincialis	Mediterranean mussel	Mytgal	neritic epipelagic benthic	2.69	SLB	NA	5.5	NA	NA	NA	SO	Ace	LMW	Petrogenic	DW	0.003	NA	0.0031	0.000465	NA	NA	450	23 September - 23 October 2003	23/10/2003	Autumn	T	Fabbri et al., 2006	2006	2003	8	1.13922E-05	1.70883E-06	NA	NA	NA	0.014684932	0.06	NA
773	IT	Piallassa Baiona Lagoon (Ravenna)	37.2.1	Adriatic	44.51671	12.25571	2	Bivalvia	Mytiloida	Mytilidae	Mytilus galloprovincialis	Mediterranean mussel	Mytgal	neritic epipelagic benthic	2.69	SLB	NA	5.5	NA	NA	NA	SO	Ace	LMW	Petrogenic	DW	0.003	NA	0.0022	0.00033	NA	NA	450	23 September - 23 October 2003	23/10/2003	Autumn	T	Fabbri et al., 2006	2006	2003	8	8.0848E-06	1.21272E-06	NA	NA	NA	0.014684932	0.06	NA
774	IT	Piallassa Baiona Lagoon (Ravenna)	37.2.1	Adriatic	44.49814	12.25820	2	Bivalvia	Mytiloida	Mytilidae	Mytilus galloprovincialis	Mediterranean mussel	Mytgal	neritic epipelagic benthic	2.69	SLB	NA	5.5	NA	NA	NA	SO	Acy	LMW	Petrogenic	DW	0.003	NA	0.012	0.0018	NA	NA	450	23 September - 23 October 2003	23/10/2003	Autumn	T	Fabbri et al., 2006	2006	2003	8	NA	NA	NA	NA	NA	0.014684932	NA	NA
775	IT	Piallassa Baiona Lagoon (Ravenna)	37.2.1	Adriatic	44.48870	12.25717	2	Bivalvia	Mytiloida	Mytilidae	Mytilus galloprovincialis	Mediterranean mussel	Mytgal	neritic epipelagic benthic	2.69	SLB	NA	5.5	NA	NA	NA	SO	Acy	LMW	Petrogenic	DW	0.003	NA	0.0085	0.001275	NA	NA	450	23 September - 23 October 2003	23/10/2003	Autumn	T	Fabbri et al., 2006	2006	2003	8	NA	NA	NA	NA	NA	0.014684932	NA	NA
776	IT	Piallassa Baiona Lagoon (Ravenna)	37.2.1	Adriatic	44.51671	12.25571	2	Bivalvia	Mytiloida	Mytilidae	Mytilus galloprovincialis	Mediterranean mussel	Mytgal	neritic epipelagic benthic	2.69	SLB	NA	5.5	NA	NA	NA	SO	Acy	LMW	Petrogenic	DW	0.003	NA	0.0082	0.00123	NA	NA	450	23 September - 23 October 2003	23/10/2003	Autumn	T	Fabbri et al., 2006	2006	2003	8	NA	NA	NA	NA	NA	0.014684932	NA	NA
777	IT	Piallassa Baiona Lagoon (Ravenna)	37.2.1	Adriatic	44.49814	12.25820	2	Bivalvia	Mytiloida	Mytilidae	Mytilus galloprovincialis	Mediterranean mussel	Mytgal	neritic epipelagic benthic	2.69	SLB	NA	5.5	NA	NA	NA	SO	Ant	LMW	Petrogenic	DW	0.003	NA	<0,001	0.000075	NA	NA	450	23 September - 23 October 2003	23/10/2003	Autumn	T	Fabbri et al., 2006	2006	2003	8	NA	5.51236E-08	NA	NA	NA	0.014684932	0.3	NA
778	IT	Piallassa Baiona Lagoon (Ravenna)	37.2.1	Adriatic	44.48870	12.25717	2	Bivalvia	Mytiloida	Mytilidae	Mytilus galloprovincialis	Mediterranean mussel	Mytgal	neritic epipelagic benthic	2.69	SLB	NA	5.5	NA	NA	NA	SO	Ant	LMW	Petrogenic	DW	0.003	NA	<0,001	0.000075	NA	NA	450	23 September - 23 October 2003	23/10/2003	Autumn	T	Fabbri et al., 2006	2006	2003	8	NA	5.51236E-08	NA	NA	NA	0.014684932	0.3	NA
779	IT	Piallassa Baiona Lagoon (Ravenna)	37.2.1	Adriatic	44.51671	12.25571	2	Bivalvia	Mytiloida	Mytilidae	Mytilus galloprovincialis	Mediterranean mussel	Mytgal	neritic epipelagic benthic	2.69	SLB	NA	5.5	NA	NA	NA	SO	Ant	LMW	Petrogenic	DW	0.003	NA	<0,001	0.000075	NA	NA	450	23 September - 23 October 2003	23/10/2003	Autumn	T	Fabbri et al., 2006	2006	2003	8	NA	5.51236E-08	NA	NA	NA	0.014684932	0.3	NA
780	IT	Piallassa Baiona Lagoon (Ravenna)	37.2.1	Adriatic	44.49814	12.25820	2	Bivalvia	Mytiloida	Mytilidae	Mytilus galloprovincialis	Mediterranean mussel	Mytgal	neritic epipelagic benthic	2.69	SLB	NA	5.5	NA	NA	NA	SO	BaP	HMW	Pyrolitic	DW	0.003	NA	<0,005	0.000375	NA	NA	450	23 September - 23 October 2003	23/10/2003	Autumn	T	Fabbri et al., 2006	2006	2003	8	NA	0.000275618	NA	NA	2.39788E-07	0.014684932	0.0003	2.9
781	IT	Piallassa Baiona Lagoon (Ravenna)	37.2.1	Adriatic	44.48870	12.25717	2	Bivalvia	Mytiloida	Mytilidae	Mytilus galloprovincialis	Mediterranean mussel	Mytgal	neritic epipelagic benthic	2.69	SLB	NA	5.5	NA	NA	NA	SO	BaP	HMW	Pyrolitic	DW	0.003	NA	<0,005	0.000375	NA	NA	450	23 September - 23 October 2003	23/10/2003	Autumn	T	Fabbri et al., 2006	2006	2003	8	NA	0.000275618	NA	NA	2.39788E-07	0.014684932	0.0003	2.9
782	IT	Piallassa Baiona Lagoon (Ravenna)	37.2.1	Adriatic	44.51671	12.25571	2	Bivalvia	Mytiloida	Mytilidae	Mytilus galloprovincialis	Mediterranean mussel	Mytgal	neritic epipelagic benthic	2.69	SLB	NA	5.5	NA	NA	NA	SO	BaP	HMW	Pyrolitic	DW	0.003	NA	<0,005	0.000375	NA	NA	450	23 September - 23 October 2003	23/10/2003	Autumn	T	Fabbri et al., 2006	2006	2003	8	NA	0.000275618	NA	NA	2.39788E-07	0.014684932	0.0003	2.9
783	IT	Piallassa Baiona Lagoon (Ravenna)	37.2.1	Adriatic	44.49814	12.25820	2	Bivalvia	Mytiloida	Mytilidae	Mytilus galloprovincialis	Mediterranean mussel	Mytgal	neritic epipelagic benthic	2.69	SLB	NA	5.5	NA	NA	NA	SO	BbF+BkF	HMW	Pyrolitic	DW	0.003	NA	<0,005	0.000375	NA	NA	450	23 September - 23 October 2003	23/10/2003	Autumn	T	Fabbri et al., 2006	2006	2003	8	NA	NA	NA	NA	NA	0.014684932	NA	NA
784	IT	Piallassa Baiona Lagoon (Ravenna)	37.2.1	Adriatic	44.48870	12.25717	2	Bivalvia	Mytiloida	Mytilidae	Mytilus galloprovincialis	Mediterranean mussel	Mytgal	neritic epipelagic benthic	2.69	SLB	NA	5.5	NA	NA	NA	SO	BbF+BkF	HMW	Pyrolitic	DW	0.003	NA	<0,005	0.000375	NA	NA	450	23 September - 23 October 2003	23/10/2003	Autumn	T	Fabbri et al., 2006	2006	2003	8	NA	NA	NA	NA	NA	0.014684932	NA	NA
785	IT	Piallassa Baiona Lagoon (Ravenna)	37.2.1	Adriatic	44.51671	12.25571	2	Bivalvia	Mytiloida	Mytilidae	Mytilus galloprovincialis	Mediterranean mussel	Mytgal	neritic epipelagic benthic	2.69	SLB	NA	5.5	NA	NA	NA	SO	BbF+BkF	HMW	Pyrolitic	DW	0.003	NA	<0,005	0.000375	NA	NA	450	23 September - 23 October 2003	23/10/2003	Autumn	T	Fabbri et al., 2006	2006	2003	8	NA	NA	NA	NA	NA	0.014684932	NA	NA
786	IT	Piallassa Baiona Lagoon (Ravenna)	37.2.1	Adriatic	44.49814	12.25820	2	Bivalvia	Mytiloida	Mytilidae	Mytilus galloprovincialis	Mediterranean mussel	Mytgal	neritic epipelagic benthic	2.69	SLB	NA	5.5	NA	NA	NA	SO	BghiFlu	HMW	Pyrolitic	DW	0.003	NA	0.03	0.0045	NA	NA	450	23 September - 23 October 2003	23/10/2003	Autumn	T	Fabbri et al., 2006	2006	2003	8	NA	NA	NA	NA	NA	0.014684932	NA	NA
787	IT	Piallassa Baiona Lagoon (Ravenna)	37.2.1	Adriatic	44.48870	12.25717	2	Bivalvia	Mytiloida	Mytilidae	Mytilus galloprovincialis	Mediterranean mussel	Mytgal	neritic epipelagic benthic	2.69	SLB	NA	5.5	NA	NA	NA	SO	BghiFlu	HMW	Pyrolitic	DW	0.003	NA	0.029	0.00435	NA	NA	450	23 September - 23 October 2003	23/10/2003	Autumn	T	Fabbri et al., 2006	2006	2003	8	NA	NA	NA	NA	NA	0.014684932	NA	NA
788	IT	Piallassa Baiona Lagoon (Ravenna)	37.2.1	Adriatic	44.51671	12.25571	2	Bivalvia	Mytiloida	Mytilidae	Mytilus galloprovincialis	Mediterranean mussel	Mytgal	neritic epipelagic benthic	2.69	SLB	NA	5.5	NA	NA	NA	SO	BghiFlu	HMW	Pyrolitic	DW	0.003	NA	0.0151	0.002265	NA	NA	450	23 September - 23 October 2003	23/10/2003	Autumn	T	Fabbri et al., 2006	2006	2003	8	NA	NA	NA	NA	NA	0.014684932	NA	NA
789	IT	Piallassa Baiona Lagoon (Ravenna)	37.2.1	Adriatic	44.49814	12.25820	2	Bivalvia	Mytiloida	Mytilidae	Mytilus galloprovincialis	Mediterranean mussel	Mytgal	neritic epipelagic benthic	2.69	SLB	NA	5.5	NA	NA	NA	SO	BghiP	HMW	Pyrolitic	DW	0.003	NA	<0,01	0.00075	NA	NA	450	23 September - 23 October 2003	23/10/2003	Autumn	T	Fabbri et al., 2006	2006	2003	8	NA	NA	NA	NA	NA	0.014684932	NA	NA
790	IT	Piallassa Baiona Lagoon (Ravenna)	37.2.1	Adriatic	44.48870	12.25717	2	Bivalvia	Mytiloida	Mytilidae	Mytilus galloprovincialis	Mediterranean mussel	Mytgal	neritic epipelagic benthic	2.69	SLB	NA	5.5	NA	NA	NA	SO	BghiP	HMW	Pyrolitic	DW	0.003	NA	<0,01	0.00075	NA	NA	450	23 September - 23 October 2003	23/10/2003	Autumn	T	Fabbri et al., 2006	2006	2003	8	NA	NA	NA	NA	NA	0.014684932	NA	NA
791	IT	Piallassa Baiona Lagoon (Ravenna)	37.2.1	Adriatic	44.51671	12.25571	2	Bivalvia	Mytiloida	Mytilidae	Mytilus galloprovincialis	Mediterranean mussel	Mytgal	neritic epipelagic benthic	2.69	SLB	NA	5.5	NA	NA	NA	SO	BghiP	HMW	Pyrolitic	DW	0.003	NA	<0,01	0.00075	NA	NA	450	23 September - 23 October 2003	23/10/2003	Autumn	T	Fabbri et al., 2006	2006	2003	8	NA	NA	NA	NA	NA	0.014684932	NA	NA
792	IT	Piallassa Baiona Lagoon (Ravenna)	37.2.1	Adriatic	44.49814	12.25820	2	Bivalvia	Mytiloida	Mytilidae	Mytilus galloprovincialis	Mediterranean mussel	Mytgal	neritic epipelagic benthic	2.69	SLB	NA	5.5	NA	NA	NA	SO	CcdPyr	HMW	Pyrolitic	DW	0.003	NA	0.027	0.00405	NA	NA	450	23 September - 23 October 2003	23/10/2003	Autumn	T	Fabbri et al., 2006	2006	2003	8	NA	NA	NA	NA	NA	0.014684932	NA	NA
793	IT	Piallassa Baiona Lagoon (Ravenna)	37.2.1	Adriatic	44.48870	12.25717	2	Bivalvia	Mytiloida	Mytilidae	Mytilus galloprovincialis	Mediterranean mussel	Mytgal	neritic epipelagic benthic	2.69	SLB	NA	5.5	NA	NA	NA	SO	CcdPyr	HMW	Pyrolitic	DW	0.003	NA	0.0152	0.00228	NA	NA	450	23 September - 23 October 2003	23/10/2003	Autumn	T	Fabbri et al., 2006	2006	2003	8	NA	NA	NA	NA	NA	0.014684932	NA	NA
794	IT	Piallassa Baiona Lagoon (Ravenna)	37.2.1	Adriatic	44.51671	12.25571	2	Bivalvia	Mytiloida	Mytilidae	Mytilus galloprovincialis	Mediterranean mussel	Mytgal	neritic epipelagic benthic	2.69	SLB	NA	5.5	NA	NA	NA	SO	CcdPyr	HMW	Pyrolitic	DW	0.003	NA	0.0114	0.00171	NA	NA	450	23 September - 23 October 2003	23/10/2003	Autumn	T	Fabbri et al., 2006	2006	2003	8	NA	NA	NA	NA	NA	0.014684932	NA	NA
795	IT	Piallassa Baiona Lagoon (Ravenna)	37.2.1	Adriatic	44.49814	12.25820	2	Bivalvia	Mytiloida	Mytilidae	Mytilus galloprovincialis	Mediterranean mussel	Mytgal	neritic epipelagic benthic	2.69	SLB	NA	5.5	NA	NA	NA	SO	Chr+BaA	HMW	Pyrolitic	DW	0.003	NA	0.026	0.0039	NA	NA	450	23 September - 23 October 2003	23/10/2003	Autumn	T	Fabbri et al., 2006	2006	2003	8	NA	NA	NA	NA	NA	0.014684932	NA	NA
796	IT	Piallassa Baiona Lagoon (Ravenna)	37.2.1	Adriatic	44.48870	12.25717	2	Bivalvia	Mytiloida	Mytilidae	Mytilus galloprovincialis	Mediterranean mussel	Mytgal	neritic epipelagic benthic	2.69	SLB	NA	5.5	NA	NA	NA	SO	Chr+BaA	HMW	Pyrolitic	DW	0.003	NA	<0,003	0.000225	NA	NA	450	23 September - 23 October 2003	23/10/2003	Autumn	T	Fabbri et al., 2006	2006	2003	8	NA	NA	NA	NA	NA	0.014684932	NA	NA
797	IT	Piallassa Baiona Lagoon (Ravenna)	37.2.1	Adriatic	44.51671	12.25571	2	Bivalvia	Mytiloida	Mytilidae	Mytilus galloprovincialis	Mediterranean mussel	Mytgal	neritic epipelagic benthic	2.69	SLB	NA	5.5	NA	NA	NA	SO	Chr+BaA	HMW	Pyrolitic	DW	0.003	NA	<0,003	0.000225	NA	NA	450	23 September - 23 October 2003	23/10/2003	Autumn	T	Fabbri et al., 2006	2006	2003	8	NA	NA	NA	NA	NA	0.014684932	NA	NA
798	IT	Piallassa Baiona Lagoon (Ravenna)	37.2.1	Adriatic	44.49814	12.25820	2	Bivalvia	Mytiloida	Mytilidae	Mytilus galloprovincialis	Mediterranean mussel	Mytgal	neritic epipelagic benthic	2.69	SLB	NA	5.5	NA	NA	NA	SO	Fl	LMW	Petrogenic	DW	0.003	NA	0.0137	0.002055	NA	NA	450	23 September - 23 October 2003	23/10/2003	Autumn	T	Fabbri et al., 2006	2006	2003	8	7.55194E-05	1.13279E-05	NA	NA	NA	0.014684932	0.04	NA
799	IT	Piallassa Baiona Lagoon (Ravenna)	37.2.1	Adriatic	44.48870	12.25717	2	Bivalvia	Mytiloida	Mytilidae	Mytilus galloprovincialis	Mediterranean mussel	Mytgal	neritic epipelagic benthic	2.69	SLB	NA	5.5	NA	NA	NA	SO	Fl	LMW	Petrogenic	DW	0.003	NA	0.0183	0.002745	NA	NA	450	23 September - 23 October 2003	23/10/2003	Autumn	T	Fabbri et al., 2006	2006	2003	8	0.000100876	1.51314E-05	NA	NA	NA	0.014684932	0.04	NA
800	IT	Piallassa Baiona Lagoon (Ravenna)	37.2.1	Adriatic	44.51671	12.25571	2	Bivalvia	Mytiloida	Mytilidae	Mytilus galloprovincialis	Mediterranean mussel	Mytgal	neritic epipelagic benthic	2.69	SLB	NA	5.5	NA	NA	NA	SO	Fl	LMW	Petrogenic	DW	0.003	NA	0.0137	0.002055	NA	NA	450	23 September - 23 October 2003	23/10/2003	Autumn	T	Fabbri et al., 2006	2006	2003	8	7.55194E-05	1.13279E-05	NA	NA	NA	0.014684932	0.04	NA
801	IT	Piallassa Baiona Lagoon (Ravenna)	37.2.1	Adriatic	44.49814	12.25820	2	Bivalvia	Mytiloida	Mytilidae	Mytilus galloprovincialis	Mediterranean mussel	Mytgal	neritic epipelagic benthic	2.69	SLB	NA	5.5	NA	NA	NA	SO	Flu	MMW	Pyrolitic	DW	0.003	NA	0.0361	0.005415	NA	NA	450	23 September - 23 October 2003	23/10/2003	Autumn	T	Fabbri et al., 2006	2006	2003	8	0.000198996	2.98494E-05	NA	NA	NA	0.014684932	0.04	NA
802	IT	Piallassa Baiona Lagoon (Ravenna)	37.2.1	Adriatic	44.48870	12.25717	2	Bivalvia	Mytiloida	Mytilidae	Mytilus galloprovincialis	Mediterranean mussel	Mytgal	neritic epipelagic benthic	2.69	SLB	NA	5.5	NA	NA	NA	SO	Flu	MMW	Pyrolitic	DW	0.003	NA	0.048	0.0072	NA	NA	450	23 September - 23 October 2003	23/10/2003	Autumn	T	Fabbri et al., 2006	2006	2003	8	0.000264593	3.9689E-05	NA	NA	NA	0.014684932	0.04	NA
803	IT	Piallassa Baiona Lagoon (Ravenna)	37.2.1	Adriatic	44.51671	12.25571	2	Bivalvia	Mytiloida	Mytilidae	Mytilus galloprovincialis	Mediterranean mussel	Mytgal	neritic epipelagic benthic	2.69	SLB	NA	5.5	NA	NA	NA	SO	Flu	MMW	Pyrolitic	DW	0.003	NA	0.031	0.00465	NA	NA	450	23 September - 23 October 2003	23/10/2003	Autumn	T	Fabbri et al., 2006	2006	2003	8	0.000170883	2.56325E-05	NA	NA	NA	0.014684932	0.04	NA
804	IT	Piallassa Baiona Lagoon (Ravenna)	37.2.1	Adriatic	44.49814	12.25820	2	Bivalvia	Mytiloida	Mytilidae	Mytilus galloprovincialis	Mediterranean mussel	Mytgal	neritic epipelagic benthic	2.69	SLB	NA	5.5	NA	NA	NA	SO	Nap	LMW	Petrogenic	DW	0.003	NA	0.038	0.0057	NA	NA	450	23 September - 23 October 2003	23/10/2003	Autumn	T	Fabbri et al., 2006	2006	2003	8	0.000418939	6.28409E-05	NA	NA	5.54829E-07	0.014684932	0.02	0.441455329
805	IT	Piallassa Baiona Lagoon (Ravenna)	37.2.1	Adriatic	44.48870	12.25717	2	Bivalvia	Mytiloida	Mytilidae	Mytilus galloprovincialis	Mediterranean mussel	Mytgal	neritic epipelagic benthic	2.69	SLB	NA	5.5	NA	NA	NA	SO	Nap	LMW	Petrogenic	DW	0.003	NA	0.0043	0.000645	NA	NA	450	23 September - 23 October 2003	23/10/2003	Autumn	T	Fabbri et al., 2006	2006	2003	8	4.74063E-05	7.11095E-06	NA	NA	6.27833E-08	0.014684932	0.02	0.441455329
806	IT	Piallassa Baiona Lagoon (Ravenna)	37.2.1	Adriatic	44.51671	12.25571	2	Bivalvia	Mytiloida	Mytilidae	Mytilus galloprovincialis	Mediterranean mussel	Mytgal	neritic epipelagic benthic	2.69	SLB	NA	5.5	NA	NA	NA	SO	Nap	LMW	Petrogenic	DW	0.003	NA	0.032	0.0048	NA	NA	450	23 September - 23 October 2003	23/10/2003	Autumn	T	Fabbri et al., 2006	2006	2003	8	0.000352791	5.29187E-05	NA	NA	4.67225E-07	0.014684932	0.02	0.441455329
807	IT	Piallassa Baiona Lagoon (Ravenna)	37.2.1	Adriatic	44.49814	12.25820	2	Bivalvia	Mytiloida	Mytilidae	Mytilus galloprovincialis	Mediterranean mussel	Mytgal	neritic epipelagic benthic	2.69	SLB	NA	5.5	NA	NA	NA	SO	Phe	LMW	Petrogenic	DW	0.003	NA	0.0278	0.00417	NA	NA	450	23 September - 23 October 2003	23/10/2003	Autumn	T	Fabbri et al., 2006	2006	2003	8	NA	NA	NA	NA	NA	0.014684932	NA	NA
808	IT	Piallassa Baiona Lagoon (Ravenna)	37.2.1	Adriatic	44.48870	12.25717	2	Bivalvia	Mytiloida	Mytilidae	Mytilus galloprovincialis	Mediterranean mussel	Mytgal	neritic epipelagic benthic	2.69	SLB	NA	5.5	NA	NA	NA	SO	Phe	LMW	Petrogenic	DW	0.003	NA	0.033	0.00495	NA	NA	450	23 September - 23 October 2003	23/10/2003	Autumn	T	Fabbri et al., 2006	2006	2003	8	NA	NA	NA	NA	NA	0.014684932	NA	NA
809	IT	Piallassa Baiona Lagoon (Ravenna)	37.2.1	Adriatic	44.51671	12.25571	2	Bivalvia	Mytiloida	Mytilidae	Mytilus galloprovincialis	Mediterranean mussel	Mytgal	neritic epipelagic benthic	2.69	SLB	NA	5.5	NA	NA	NA	SO	Phe	LMW	Petrogenic	DW	0.003	NA	0.031	0.00465	NA	NA	450	23 September - 23 October 2003	23/10/2003	Autumn	T	Fabbri et al., 2006	2006	2003	8	NA	NA	NA	NA	NA	0.014684932	NA	NA
810	IT	Piallassa Baiona Lagoon (Ravenna)	37.2.1	Adriatic	44.49814	12.25820	2	Bivalvia	Mytiloida	Mytilidae	Mytilus galloprovincialis	Mediterranean mussel	Mytgal	neritic epipelagic benthic	2.69	SLB	NA	5.5	NA	NA	NA	SO	Pyr	MMW	Pyrolitic	DW	0.003	NA	0.099	0.01485	NA	NA	450	23 September - 23 October 2003	23/10/2003	Autumn	T	Fabbri et al., 2006	2006	2003	8	0.000727632	0.000109145	NA	NA	NA	0.014684932	0.03	NA
811	IT	Piallassa Baiona Lagoon (Ravenna)	37.2.1	Adriatic	44.48870	12.25717	2	Bivalvia	Mytiloida	Mytilidae	Mytilus galloprovincialis	Mediterranean mussel	Mytgal	neritic epipelagic benthic	2.69	SLB	NA	5.5	NA	NA	NA	SO	Pyr	MMW	Pyrolitic	DW	0.003	NA	0.1	0.015	NA	NA	450	23 September - 23 October 2003	23/10/2003	Autumn	T	Fabbri et al., 2006	2006	2003	8	0.000734982	0.000110247	NA	NA	NA	0.014684932	0.03	NA
812	IT	Piallassa Baiona Lagoon (Ravenna)	37.2.1	Adriatic	44.51671	12.25571	2	Bivalvia	Mytiloida	Mytilidae	Mytilus galloprovincialis	Mediterranean mussel	Mytgal	neritic epipelagic benthic	2.69	SLB	NA	5.5	NA	NA	NA	SO	Pyr	MMW	Pyrolitic	DW	0.003	NA	0.06	0.009	NA	NA	450	23 September - 23 October 2003	23/10/2003	Autumn	T	Fabbri et al., 2006	2006	2003	8	0.000440989	6.61483E-05	NA	NA	NA	0.014684932	0.03	NA
813	IT	Central Adriatic Sea	37.2.1	Adriatic	43.15611	14.53944	4B	Malacostraca	Decapoda	Nephropidae	Nephrops norvegicus	Norway lobster	Nepnor	neritic mesopelagic benthic	3.67	SLB	NA	NA	NA	NA	NA	SO	Ant	LMW	Petrogenic	WW	NA	0.00005	0.00005	0.00005	<LOQ	0.00011	NA	July 2004	01/07/2004	Summer	W	Perugini et al., 2007_a	2007	2004	9	1.52893E-08	1.52893E-08	NA	3.36364E-08	NA	0.006109589	0.3	NA
814	IT	Central Adriatic Sea	37.2.1	Adriatic	43.15611	14.53944	4B	Malacostraca	Decapoda	Nephropidae	Nephrops norvegicus	Norway lobster	Nepnor	neritic mesopelagic benthic	3.67	SLB	NA	NA	NA	NA	NA	SO	BaA	HMW	Pyrolitic	WW	NA	0.00005	0.00097	0.00097	0.00005	0.00176	NA	July 2004	01/07/2004	Summer	W	Perugini et al., 2007_a	2007	2004	9	NA	NA	NA	NA	1.0678E-07	0.006109589	NA	1.2
815	IT	Central Adriatic Sea	37.2.1	Adriatic	43.15611	14.53944	4B	Malacostraca	Decapoda	Nephropidae	Nephrops norvegicus	Norway lobster	Nepnor	neritic mesopelagic benthic	3.67	SLB	NA	NA	NA	NA	NA	SO	BbF	HMW	Pyrolitic	WW	NA	0.00025	<LOQ	NA	<LOQ	0	NA	July 2004	01/07/2004	Summer	W	Perugini et al., 2007_a	2007	2004	9	NA	NA	NA	NA	NA	0.006109589	NA	1.2
816	IT	Central Adriatic Sea	37.2.1	Adriatic	43.15611	14.53944	4B	Malacostraca	Decapoda	Nephropidae	Nephrops norvegicus	Norway lobster	Nepnor	neritic mesopelagic benthic	3.67	SLB	NA	NA	NA	NA	NA	SO	BkF	HMW	Pyrolitic	WW	NA	0.00005	0.00025	0.00025	0.00015	0.00066	NA	July 2004	01/07/2004	Summer	W	Perugini et al., 2007_a	2007	2004	9	NA	NA	NA	NA	2.75207E-08	0.006109589	NA	1.2
817	IT	Central Adriatic Sea	37.2.1	Adriatic	43.15611	14.53944	4B	Malacostraca	Decapoda	Nephropidae	Nephrops norvegicus	Norway lobster	Nepnor	neritic mesopelagic benthic	3.67	SLB	NA	NA	NA	NA	NA	SO	Chr	HMW	Pyrolitic	WW	NA	0.00005	<LOQ	NA	<LOQ	0	NA	July 2004	01/07/2004	Summer	W	Perugini et al., 2007_a	2007	2004	9	NA	NA	NA	NA	NA	0.006109589	NA	0.441455329
818	IT	Central Adriatic Sea	37.2.1	Adriatic	43.15611	14.53944	4B	Malacostraca	Decapoda	Nephropidae	Nephrops norvegicus	Norway lobster	Nepnor	neritic mesopelagic benthic	3.67	SLB	NA	NA	NA	NA	NA	SO	Fl	LMW	Petrogenic	WW	NA	0.0001	0.02331	0.02331	0.00363	0.08164	NA	July 2004	01/07/2004	Summer	W	Perugini et al., 2007_a	2007	2004	9	5.34589E-05	5.34589E-05	8.325E-06	0.000187232	NA	0.006109589	0.04	NA
819	IT	Central Adriatic Sea	37.2.1	Adriatic	43.15611	14.53944	4B	Malacostraca	Decapoda	Nephropidae	Nephrops norvegicus	Norway lobster	Nepnor	neritic mesopelagic benthic	3.67	SLB	NA	NA	NA	NA	NA	SO	Flu	MMW	Pyrolitic	WW	NA	0.00025	0.00076	0.00076	0.00053	0.00097	NA	July 2004	01/07/2004	Summer	W	Perugini et al., 2007_a	2007	2004	9	1.74298E-06	1.74298E-06	1.2155E-06	2.22459E-06	NA	0.006109589	0.04	NA
820	IT	Central Adriatic Sea	37.2.1	Adriatic	43.15611	14.53944	4B	Malacostraca	Decapoda	Nephropidae	Nephrops norvegicus	Norway lobster	Nepnor	neritic mesopelagic benthic	3.67	SLB	NA	NA	NA	NA	NA	SO	Phe	LMW	Petrogenic	WW	NA	0.00005	0.00199	0.00199	0.00078	0.0033	NA	July 2004	01/07/2004	Summer	W	Perugini et al., 2007_a	2007	2004	9	NA	NA	NA	NA	NA	0.006109589	NA	NA
821	IT	Central Adriatic Sea	37.2.1	Adriatic	43.15611	14.53944	4B	Cephalopoda	Oegopsida	Ommastrephidae	Todarodes sagittatus	European flying squid	Todsag	oceanic bathypelagic benthic	4.40	SLB	NA	NA	NA	NA	NA	SO	Ant	LMW	Petrogenic	WW	NA	0.00005	0.00011	0.00011	0.00005	0.00016	NA	July 2004	01/07/2004	Summer	W	Perugini et al., 2007_a	2007	2004	9	6.1541E-08	6.1541E-08	2.79732E-08	8.95142E-08	NA	0.011178082	0.3	NA
822	IT	Central Adriatic Sea	37.2.1	Adriatic	43.15611	14.53944	4B	Cephalopoda	Oegopsida	Ommastrephidae	Todarodes sagittatus	European flying squid	Todsag	oceanic bathypelagic benthic	4.40	SLB	NA	NA	NA	NA	NA	SO	BaA	HMW	Pyrolitic	WW	NA	0.00005	<LOQ	NA	<LOQ	0	NA	July 2004	01/07/2004	Summer	W	Perugini et al., 2007_a	2007	2004	9	NA	NA	NA	NA	NA	0.011178082	NA	1.2
823	IT	Central Adriatic Sea	37.2.1	Adriatic	43.15611	14.53944	4B	Cephalopoda	Oegopsida	Ommastrephidae	Todarodes sagittatus	European flying squid	Todsag	oceanic bathypelagic benthic	4.40	SLB	NA	NA	NA	NA	NA	SO	BbF	HMW	Pyrolitic	WW	NA	0.00025	<LOQ	NA	<LOQ	0	NA	July 2004	01/07/2004	Summer	W	Perugini et al., 2007_a	2007	2004	9	NA	NA	NA	NA	NA	0.011178082	NA	1.2
824	IT	Central Adriatic Sea	37.2.1	Adriatic	43.15611	14.53944	4B	Cephalopoda	Oegopsida	Ommastrephidae	Todarodes sagittatus	European flying squid	Todsag	oceanic bathypelagic benthic	4.40	SLB	NA	NA	NA	NA	NA	SO	BkF	HMW	Pyrolitic	WW	NA	0.00005	0.0001	0.0001	0.00006	0.0002	NA	July 2004	01/07/2004	Summer	W	Perugini et al., 2007_a	2007	2004	9	NA	NA	NA	NA	2.01407E-08	0.011178082	NA	1.2
825	IT	Central Adriatic Sea	37.2.1	Adriatic	43.15611	14.53944	4B	Cephalopoda	Oegopsida	Ommastrephidae	Todarodes sagittatus	European flying squid	Todsag	oceanic bathypelagic benthic	4.40	SLB	NA	NA	NA	NA	NA	SO	Chr	HMW	Pyrolitic	WW	NA	0.00005	<LOQ	NA	<LOQ	0	NA	July 2004	01/07/2004	Summer	W	Perugini et al., 2007_a	2007	2004	9	NA	NA	NA	NA	NA	0.011178082	NA	0.441455329
826	IT	Central Adriatic Sea	37.2.1	Adriatic	43.15611	14.53944	4B	Cephalopoda	Oegopsida	Ommastrephidae	Todarodes sagittatus	European flying squid	Todsag	oceanic bathypelagic benthic	4.40	SLB	NA	NA	NA	NA	NA	SO	Fl	LMW	Petrogenic	WW	NA	0.0001	0.0188	0.0188	<LOQ	0.07112	NA	July 2004	01/07/2004	Summer	W	Perugini et al., 2007_a	2007	2004	9	7.88844E-05	7.88844E-05	NA	0.000298418	NA	0.011178082	0.04	NA
827	IT	Central Adriatic Sea	37.2.1	Adriatic	43.15611	14.53944	4B	Cephalopoda	Oegopsida	Ommastrephidae	Todarodes sagittatus	European flying squid	Todsag	oceanic bathypelagic benthic	4.40	SLB	NA	NA	NA	NA	NA	SO	Flu	MMW	Pyrolitic	WW	NA	0.00025	0.0011	0.0011	0.00062	0.00168	NA	July 2004	01/07/2004	Summer	W	Perugini et al., 2007_a	2007	2004	9	4.61557E-06	4.61557E-06	2.60151E-06	7.04924E-06	NA	0.011178082	0.04	NA
828	IT	Central Adriatic Sea	37.2.1	Adriatic	43.15611	14.53944	4B	Cephalopoda	Oegopsida	Ommastrephidae	Todarodes sagittatus	European flying squid	Todsag	oceanic bathypelagic benthic	4.40	SLB	NA	NA	NA	NA	NA	SO	Phe	LMW	Petrogenic	WW	NA	0.00005	0.00163	0.00163	0.00044	0.00319	NA	July 2004	01/07/2004	Summer	W	Perugini et al., 2007_a	2007	2004	9	NA	NA	NA	NA	NA	0.011178082	NA	NA
829	IT	Central Adriatic Sea	37.2.1	Adriatic	43.15611	14.53944	4B	Bivalvia	Mytiloida	Mytilidae	Mytilus galloprovincialis	Mediterranean mussel	Mytgal	neritic epipelagic benthic	2.69	SLB	NA	NA	NA	NA	NA	SO	Ant	LMW	Petrogenic	WW	NA	0.00005	0.00047	0.00047	0.00039	0.00069	NA	July 2004	01/07/2004	Summer	W	Perugini et al., 2007_a	2007	2004	9	3.45441E-07	3.45441E-07	2.86643E-07	5.07137E-07	NA	0.014684932	0.3	NA
830	IT	Central Adriatic Sea	37.2.1	Adriatic	43.15611	14.53944	4B	Bivalvia	Mytiloida	Mytilidae	Mytilus galloprovincialis	Mediterranean mussel	Mytgal	neritic epipelagic benthic	2.69	SLB	NA	NA	NA	NA	NA	SO	BaA	HMW	Pyrolitic	WW	NA	0.00005	0.01564	0.01564	0.01123	0.02131	NA	July 2004	01/07/2004	Summer	W	Perugini et al., 2007_a	2007	2004	9	NA	NA	NA	NA	4.13824E-06	0.014684932	NA	1.2
831	IT	Central Adriatic Sea	37.2.1	Adriatic	43.15611	14.53944	4B	Bivalvia	Mytiloida	Mytilidae	Mytilus galloprovincialis	Mediterranean mussel	Mytgal	neritic epipelagic benthic	2.69	SLB	NA	NA	NA	NA	NA	SO	BbF	HMW	Pyrolitic	WW	NA	0.00025	<LOQ	NA	<LOQ	0	NA	July 2004	01/07/2004	Summer	W	Perugini et al., 2007_a	2007	2004	9	NA	NA	NA	NA	NA	0.014684932	NA	1.2
832	IT	Central Adriatic Sea	37.2.1	Adriatic	43.15611	14.53944	4B	Bivalvia	Mytiloida	Mytilidae	Mytilus galloprovincialis	Mediterranean mussel	Mytgal	neritic epipelagic benthic	2.69	SLB	NA	NA	NA	NA	NA	SO	BkF	HMW	Pyrolitic	WW	NA	0.00005	0.00015	0.00015	<LOQ	0.00028	NA	July 2004	01/07/2004	Summer	W	Perugini et al., 2007_a	2007	2004	9	NA	NA	NA	NA	3.9689E-08	0.014684932	NA	1.2
833	IT	Central Adriatic Sea	37.2.1	Adriatic	43.15611	14.53944	4B	Bivalvia	Mytiloida	Mytilidae	Mytilus galloprovincialis	Mediterranean mussel	Mytgal	neritic epipelagic benthic	2.69	SLB	NA	NA	NA	NA	NA	SO	Chr	HMW	Pyrolitic	WW	NA	0.00005	0.00049	0.00049	0.0002	0.00103	NA	July 2004	01/07/2004	Summer	W	Perugini et al., 2007_a	2007	2004	9	NA	NA	NA	NA	4.76958E-08	0.014684932	NA	0.441455329
834	IT	Central Adriatic Sea	37.2.1	Adriatic	43.15611	14.53944	4B	Bivalvia	Mytiloida	Mytilidae	Mytilus galloprovincialis	Mediterranean mussel	Mytgal	neritic epipelagic benthic	2.69	SLB	NA	NA	NA	NA	NA	SO	Fl	LMW	Petrogenic	WW	NA	0.0001	0.00328	0.00328	0.00151	0.00983	NA	July 2004	01/07/2004	Summer	W	Perugini et al., 2007_a	2007	2004	9	1.80805E-05	1.80805E-05	8.32367E-06	5.41865E-05	NA	0.014684932	0.04	NA
835	IT	Central Adriatic Sea	37.2.1	Adriatic	43.15611	14.53944	4B	Bivalvia	Mytiloida	Mytilidae	Mytilus galloprovincialis	Mediterranean mussel	Mytgal	neritic epipelagic benthic	2.69	SLB	NA	NA	NA	NA	NA	SO	Flu	MMW	Pyrolitic	WW	NA	0.00025	0.00863	0.00863	0.00547	0.01158	NA	July 2004	01/07/2004	Summer	W	Perugini et al., 2007_a	2007	2004	9	4.75717E-05	4.75717E-05	3.01526E-05	6.38331E-05	NA	0.014684932	0.04	NA
836	IT	Central Adriatic Sea	37.2.1	Adriatic	43.15611	14.53944	4B	Bivalvia	Mytiloida	Mytilidae	Mytilus galloprovincialis	Mediterranean mussel	Mytgal	neritic epipelagic benthic	2.69	SLB	NA	NA	NA	NA	NA	SO	Phe	LMW	Petrogenic	WW	NA	0.00005	0.00334	0.00334	0.00281	0.0039	NA	July 2004	01/07/2004	Summer	W	Perugini et al., 2007_a	2007	2004	9	NA	NA	NA	NA	NA	0.014684932	NA	NA
837	IT	Central Adriatic Sea	37.2.1	Adriatic	43.15611	14.53944	4B	Actinopterygii	Gadiformes	Gadidae	Micromesistius poutassou	Blue whiting	Micpou	oceanic bathypelagic	3.70	FB	NA	NA	NA	NA	NA	FI	Ant	LMW	Petrogenic	WW	NA	0.00005	<LOQ	NA	<LOQ	0	NA	July 2004	01/07/2004	Summer	W	Perugini et al., 2007_a	2007	2004	9	NA	NA	NA	0	NA	0.014849315	0.3	NA
838	IT	Central Adriatic Sea	37.2.1	Adriatic	43.15611	14.53944	4B	Actinopterygii	Gadiformes	Gadidae	Micromesistius poutassou	Blue whiting	Micpou	oceanic bathypelagic	3.70	FB	NA	NA	NA	NA	NA	FI	BaA	HMW	Pyrolitic	WW	NA	0.00005	0.03331	0.03331	0.00094	0.06694	NA	July 2004	01/07/2004	Summer	W	Perugini et al., 2007_a	2007	2004	9	NA	NA	NA	NA	8.91226E-06	0.014849315	NA	1.2
839	IT	Central Adriatic Sea	37.2.1	Adriatic	43.15611	14.53944	4B	Actinopterygii	Gadiformes	Gadidae	Micromesistius poutassou	Blue whiting	Micpou	oceanic bathypelagic	3.70	FB	NA	NA	NA	NA	NA	FI	BbF	HMW	Pyrolitic	WW	NA	0.00025	<LOQ	NA	<LOQ	0	NA	July 2004	01/07/2004	Summer	W	Perugini et al., 2007_a	2007	2004	9	NA	NA	NA	NA	NA	0.014849315	NA	1.2
840	IT	Central Adriatic Sea	37.2.1	Adriatic	43.15611	14.53944	4B	Actinopterygii	Gadiformes	Gadidae	Micromesistius poutassou	Blue whiting	Micpou	oceanic bathypelagic	3.70	FB	NA	NA	NA	NA	NA	FI	BkF	HMW	Pyrolitic	WW	NA	0.00005	0.0004	0.0004	<LOQ	0.00054	NA	July 2004	01/07/2004	Summer	W	Perugini et al., 2007_a	2007	2004	9	NA	NA	NA	NA	1.07022E-07	0.014849315	NA	1.2
841	IT	Central Adriatic Sea	37.2.1	Adriatic	43.15611	14.53944	4B	Actinopterygii	Gadiformes	Gadidae	Micromesistius poutassou	Blue whiting	Micpou	oceanic bathypelagic	3.70	FB	NA	NA	NA	NA	NA	FI	Chr	HMW	Pyrolitic	WW	NA	0.00005	<LOQ	NA	<LOQ	0	NA	July 2004	01/07/2004	Summer	W	Perugini et al., 2007_a	2007	2004	9	NA	NA	NA	NA	NA	0.014849315	NA	0.441455329
842	IT	Central Adriatic Sea	37.2.1	Adriatic	43.15611	14.53944	4B	Actinopterygii	Gadiformes	Gadidae	Micromesistius poutassou	Blue whiting	Micpou	oceanic bathypelagic	3.70	FB	NA	NA	NA	NA	NA	FI	Fl	LMW	Petrogenic	WW	NA	0.0001	0.03006	0.03006	0.00469	0.07313	NA	July 2004	01/07/2004	Summer	W	Perugini et al., 2007_a	2007	2004	9	0.000167556	0.000167556	2.61424E-05	0.000407632	NA	0.014849315	0.04	NA
843	IT	Central Adriatic Sea	37.2.1	Adriatic	43.15611	14.53944	4B	Actinopterygii	Gadiformes	Gadidae	Micromesistius poutassou	Blue whiting	Micpou	oceanic bathypelagic	3.70	FB	NA	NA	NA	NA	NA	FI	Flu	MMW	Pyrolitic	WW	NA	0.00025	0.00096	0.00096	<LOQ	0.00178	NA	July 2004	01/07/2004	Summer	W	Perugini et al., 2007_a	2007	2004	9	5.3511E-06	5.3511E-06	NA	9.92184E-06	NA	0.014849315	0.04	NA
844	IT	Central Adriatic Sea	37.2.1	Adriatic	43.15611	14.53944	4B	Actinopterygii	Gadiformes	Gadidae	Micromesistius poutassou	Blue whiting	Micpou	oceanic bathypelagic	3.70	FB	NA	NA	NA	NA	NA	FI	Phe	LMW	Petrogenic	WW	NA	0.00005	0.00056	0.00056	0.00036	0.0009	NA	July 2004	01/07/2004	Summer	W	Perugini et al., 2007_a	2007	2004	9	NA	NA	NA	NA	NA	0.014849315	NA	NA
845	IT	Central Adriatic Sea	37.2.1	Adriatic	43.15611	14.53944	4B	Actinopterygii	Perciformes	Scombridae	Scomber scombrus	Atlantic mackerel	Scosco	oceanic mesopelagic	3.73	FB	NA	NA	NA	NA	NA	FI	Ant	LMW	Petrogenic	WW	NA	0.00005	0.00019	0.00019	0.00014	0.0003	NA	July 2004	01/07/2004	Summer	W	Perugini et al., 2007_a	2007	2004	9	1.4121E-07	1.4121E-07	1.04049E-07	2.22963E-07	NA	0.014849315	0.3	NA
846	IT	Central Adriatic Sea	37.2.1	Adriatic	43.15611	14.53944	4B	Actinopterygii	Perciformes	Scombridae	Scomber scombrus	Atlantic mackerel	Scosco	oceanic mesopelagic	3.73	FB	NA	NA	NA	NA	NA	FI	BaA	HMW	Pyrolitic	WW	NA	0.00005	0.00058	0.00058	0.00029	0.0014	NA	July 2004	01/07/2004	Summer	W	Perugini et al., 2007_a	2007	2004	9	NA	NA	NA	NA	1.55182E-07	0.014849315	NA	1.2
847	IT	Central Adriatic Sea	37.2.1	Adriatic	43.15611	14.53944	4B	Actinopterygii	Perciformes	Scombridae	Scomber scombrus	Atlantic mackerel	Scosco	oceanic mesopelagic	3.73	FB	NA	NA	NA	NA	NA	FI	BbF	HMW	Pyrolitic	WW	NA	0.00025	<LOQ	NA	<LOQ	0	NA	July 2004	01/07/2004	Summer	W	Perugini et al., 2007_a	2007	2004	9	NA	NA	NA	NA	NA	0.014849315	NA	1.2
848	IT	Central Adriatic Sea	37.2.1	Adriatic	43.15611	14.53944	4B	Actinopterygii	Perciformes	Scombridae	Scomber scombrus	Atlantic mackerel	Scosco	oceanic mesopelagic	3.73	FB	NA	NA	NA	NA	NA	FI	BkF	HMW	Pyrolitic	WW	NA	0.00005	<LOQ	NA	<LOQ	0	NA	July 2004	01/07/2004	Summer	W	Perugini et al., 2007_a	2007	2004	9	NA	NA	NA	NA	NA	0.014849315	NA	1.2
849	IT	Central Adriatic Sea	37.2.1	Adriatic	43.15611	14.53944	4B	Actinopterygii	Perciformes	Scombridae	Scomber scombrus	Atlantic mackerel	Scosco	oceanic mesopelagic	3.73	FB	NA	NA	NA	NA	NA	FI	Chr	HMW	Pyrolitic	WW	NA	0.00005	<LOQ	NA	<LOQ	0	NA	July 2004	01/07/2004	Summer	W	Perugini et al., 2007_a	2007	2004	9	NA	NA	NA	NA	NA	0.014849315	NA	0.441455329
850	IT	Central Adriatic Sea	37.2.1	Adriatic	43.15611	14.53944	4B	Actinopterygii	Perciformes	Scombridae	Scomber scombrus	Atlantic mackerel	Scosco	oceanic mesopelagic	3.73	FB	NA	NA	NA	NA	NA	FI	Fl	LMW	Petrogenic	WW	NA	0.0001	0.11054	0.11054	0.01262	0.31733	NA	July 2004	01/07/2004	Summer	W	Perugini et al., 2007_a	2007	2004	9	0.000616157	0.000616157	7.03447E-05	0.001768819	NA	0.014849315	0.04	NA
851	IT	Central Adriatic Sea	37.2.1	Adriatic	43.15611	14.53944	4B	Actinopterygii	Perciformes	Scombridae	Scomber scombrus	Atlantic mackerel	Scosco	oceanic mesopelagic	3.73	FB	NA	NA	NA	NA	NA	FI	Flu	MMW	Pyrolitic	WW	NA	0.00025	0.00098	0.00098	<LOQ	0.00305	NA	July 2004	01/07/2004	Summer	W	Perugini et al., 2007_a	2007	2004	9	5.46259E-06	5.46259E-06	NA	1.70009E-05	NA	0.014849315	0.04	NA
852	IT	Central Adriatic Sea	37.2.1	Adriatic	43.15611	14.53944	4B	Actinopterygii	Perciformes	Scombridae	Scomber scombrus	Atlantic mackerel	Scosco	oceanic mesopelagic	3.73	FB	NA	NA	NA	NA	NA	FI	Phe	LMW	Petrogenic	WW	NA	0.00005	0.00447	0.00447	0.00318	0.01	NA	July 2004	01/07/2004	Summer	W	Perugini et al., 2007_a	2007	2004	9	NA	NA	NA	NA	NA	0.014849315	NA	NA
853	IT	Central Adriatic Sea	37.2.1	Adriatic	43.15611	14.53944	4B	Actinopterygii	Gadiformes	Merlucciidae	Merluccius merluccius	European hake	Mermer	neritic epipelagic demersal	4.43	FB	NA	NA	NA	NA	NA	FI	Ant	LMW	Petrogenic	WW	NA	0.00005	0.00019	0.00019	0.00013	0.00026	NA	July 2004	01/07/2004	Summer	W	Perugini et al., 2007_a	2007	2004	9	2.02435E-07	2.02435E-07	1.38508E-07	2.77017E-07	NA	0.021287671	0.3	NA
854	IT	Central Adriatic Sea	37.2.1	Adriatic	43.15611	14.53944	4B	Actinopterygii	Gadiformes	Merlucciidae	Merluccius merluccius	European hake	Mermer	neritic epipelagic demersal	4.43	FB	NA	NA	NA	NA	NA	FI	BaA	HMW	Pyrolitic	WW	NA	0.00005	0.01673	0.01673	0.01099	0.02113	NA	July 2004	01/07/2004	Summer	W	Perugini et al., 2007_a	2007	2004	9	NA	NA	NA	NA	6.41699E-06	0.021287671	NA	1.2
855	IT	Central Adriatic Sea	37.2.1	Adriatic	43.15611	14.53944	4B	Actinopterygii	Gadiformes	Merlucciidae	Merluccius merluccius	European hake	Mermer	neritic epipelagic demersal	4.43	FB	NA	NA	NA	NA	NA	FI	BbF	HMW	Pyrolitic	WW	NA	0.00025	0.00048	0.00048	0.00025	0.0009	NA	July 2004	01/07/2004	Summer	W	Perugini et al., 2007_a	2007	2004	9	NA	NA	NA	NA	1.8411E-07	0.021287671	NA	1.2
856	IT	Central Adriatic Sea	37.2.1	Adriatic	43.15611	14.53944	4B	Actinopterygii	Gadiformes	Merlucciidae	Merluccius merluccius	European hake	Mermer	neritic epipelagic demersal	4.43	FB	NA	NA	NA	NA	NA	FI	BkF	HMW	Pyrolitic	WW	NA	0.00005	0.00032	0.00032	0.00022	0.00047	NA	July 2004	01/07/2004	Summer	W	Perugini et al., 2007_a	2007	2004	9	NA	NA	NA	NA	1.2274E-07	0.021287671	NA	1.2
857	IT	Central Adriatic Sea	37.2.1	Adriatic	43.15611	14.53944	4B	Actinopterygii	Gadiformes	Merlucciidae	Merluccius merluccius	European hake	Mermer	neritic epipelagic demersal	4.43	FB	NA	NA	NA	NA	NA	FI	Chr	HMW	Pyrolitic	WW	NA	0.00005	<LOQ	NA	<LOQ	0	NA	July 2004	01/07/2004	Summer	W	Perugini et al., 2007_a	2007	2004	9	NA	NA	NA	NA	NA	0.021287671	NA	0.441455329
858	IT	Central Adriatic Sea	37.2.1	Adriatic	43.15611	14.53944	4B	Actinopterygii	Gadiformes	Merlucciidae	Merluccius merluccius	European hake	Mermer	neritic epipelagic demersal	4.43	FB	NA	NA	NA	NA	NA	FI	Fl	LMW	Petrogenic	WW	NA	0.0001	0.00839	0.00839	0.00127	0.02244	NA	July 2004	01/07/2004	Summer	W	Perugini et al., 2007_a	2007	2004	9	6.70434E-05	6.70434E-05	1.01484E-05	0.000179315	NA	0.021287671	0.04	NA
859	IT	Central Adriatic Sea	37.2.1	Adriatic	43.15611	14.53944	4B	Actinopterygii	Gadiformes	Merlucciidae	Merluccius merluccius	European hake	Mermer	neritic epipelagic demersal	4.43	FB	NA	NA	NA	NA	NA	FI	Flu	MMW	Pyrolitic	WW	NA	0.00025	0.00737	0.00737	0.00481	0.00968	NA	July 2004	01/07/2004	Summer	W	Perugini et al., 2007_a	2007	2004	9	5.88927E-05	5.88927E-05	3.84361E-05	7.73516E-05	NA	0.021287671	0.04	NA
860	IT	Central Adriatic Sea	37.2.1	Adriatic	43.15611	14.53944	4B	Actinopterygii	Gadiformes	Merlucciidae	Merluccius merluccius	European hake	Mermer	neritic epipelagic demersal	4.43	FB	NA	NA	NA	NA	NA	FI	Phe	LMW	Petrogenic	WW	NA	0.00005	0.00081	0.00081	0.00058	0.00114	NA	July 2004	01/07/2004	Summer	W	Perugini et al., 2007_a	2007	2004	9	NA	NA	NA	NA	NA	0.021287671	NA	NA
861	IT	Central Adriatic Sea	37.2.1	Adriatic	43.15611	14.53944	4B	Actinopterygii	Perciformes	Mullidae	Mullus barbatus	Red mullet	Mulbar	neritic mesopelagic demersal	3.24	FB	NA	NA	NA	NA	NA	FI	Ant	LMW	Petrogenic	WW	NA	0.00005	0.00011	0.00011	0.00006	0.00017	NA	July 2004	01/07/2004	Summer	W	Perugini et al., 2007_a	2007	2004	9	1.17199E-07	1.17199E-07	6.39269E-08	1.81126E-07	NA	0.021287671	0.3	NA
862	IT	Central Adriatic Sea	37.2.1	Adriatic	43.15611	14.53944	4B	Actinopterygii	Perciformes	Mullidae	Mullus barbatus	Red mullet	Mulbar	neritic mesopelagic demersal	3.24	FB	NA	NA	NA	NA	NA	FI	BaA	HMW	Pyrolitic	WW	NA	0.00005	0.00536	0.00536	0.00155	0.00904	NA	July 2004	01/07/2004	Summer	W	Perugini et al., 2007_a	2007	2004	9	NA	NA	NA	NA	2.05589E-06	0.021287671	NA	1.2
863	IT	Central Adriatic Sea	37.2.1	Adriatic	43.15611	14.53944	4B	Actinopterygii	Perciformes	Mullidae	Mullus barbatus	Red mullet	Mulbar	neritic mesopelagic demersal	3.24	FB	NA	NA	NA	NA	NA	FI	BbF	HMW	Pyrolitic	WW	NA	0.00025	0.0008	0.0008	0.00028	0.00098	NA	July 2004	01/07/2004	Summer	W	Perugini et al., 2007_a	2007	2004	9	NA	NA	NA	NA	3.06849E-07	0.021287671	NA	1.2
864	IT	Central Adriatic Sea	37.2.1	Adriatic	43.15611	14.53944	4B	Actinopterygii	Perciformes	Mullidae	Mullus barbatus	Red mullet	Mulbar	neritic mesopelagic demersal	3.24	FB	NA	NA	NA	NA	NA	FI	BkF	HMW	Pyrolitic	WW	NA	0.00005	0.0001	0.0001	0.00005	0.00015	NA	July 2004	01/07/2004	Summer	W	Perugini et al., 2007_a	2007	2004	9	NA	NA	NA	NA	3.83562E-08	0.021287671	NA	1.2
865	IT	Central Adriatic Sea	37.2.1	Adriatic	43.15611	14.53944	4B	Actinopterygii	Perciformes	Mullidae	Mullus barbatus	Red mullet	Mulbar	neritic mesopelagic demersal	3.24	FB	NA	NA	NA	NA	NA	FI	Chr	HMW	Pyrolitic	WW	NA	0.00005	<LOQ	NA	<LOQ	0	NA	July 2004	01/07/2004	Summer	W	Perugini et al., 2007_a	2007	2004	9	NA	NA	NA	NA	NA	0.021287671	NA	0.441455329
866	IT	Central Adriatic Sea	37.2.1	Adriatic	43.15611	14.53944	4B	Actinopterygii	Perciformes	Mullidae	Mullus barbatus	Red mullet	Mulbar	neritic mesopelagic demersal	3.24	FB	NA	NA	NA	NA	NA	FI	Fl	LMW	Petrogenic	WW	NA	0.0001	0.00511	0.00511	0.00102	0.01798	NA	July 2004	01/07/2004	Summer	W	Perugini et al., 2007_a	2007	2004	9	4.08333E-05	4.08333E-05	8.15068E-06	0.000143676	NA	0.021287671	0.04	NA
867	IT	Central Adriatic Sea	37.2.1	Adriatic	43.15611	14.53944	4B	Actinopterygii	Perciformes	Mullidae	Mullus barbatus	Red mullet	Mulbar	neritic mesopelagic demersal	3.24	FB	NA	NA	NA	NA	NA	FI	Flu	MMW	Pyrolitic	WW	NA	0.00025	0.00239	0.00239	0.00059	0.00496	NA	July 2004	01/07/2004	Summer	W	Perugini et al., 2007_a	2007	2004	9	1.90982E-05	1.90982E-05	4.71461E-06	3.96347E-05	NA	0.021287671	0.04	NA
868	IT	Central Adriatic Sea	37.2.1	Adriatic	43.15611	14.53944	4B	Actinopterygii	Perciformes	Mullidae	Mullus barbatus	Red mullet	Mulbar	neritic mesopelagic demersal	3.24	FB	NA	NA	NA	NA	NA	FI	Phe	LMW	Petrogenic	WW	NA	0.00005	0.00194	0.00194	0.00086	0.00301	NA	July 2004	01/07/2004	Summer	W	Perugini et al., 2007_a	2007	2004	9	NA	NA	NA	NA	NA	0.021287671	NA	NA
869	IT	Central Adriatic Sea	37.2.1	Adriatic	43.15611	14.53944	4B	Malacostraca	Decapoda	Nephropidae	Nephrops norvegicus	Norway lobster	Nepnor	neritic mesopelagic benthic	3.67	SLB	NA	NA	NA	NA	NA	SO	Ant	LMW	Petrogenic	WW	NA	0.00005	<LOQ	NA	<LOQ	<LOQ	NA	December 2004	01/12/2004	Autumn	W	Perugini et al., 2007_a	2007	2004	9	NA	NA	NA	NA	NA	0.006109589	0.3	NA
870	IT	Central Adriatic Sea	37.2.1	Adriatic	43.15611	14.53944	4B	Malacostraca	Decapoda	Nephropidae	Nephrops norvegicus	Norway lobster	Nepnor	neritic mesopelagic benthic	3.67	SLB	NA	NA	NA	NA	NA	SO	BaA	HMW	Pyrolitic	WW	NA	0.00005	0.00055	0.00055	0.00026	0.0008	NA	December 2004	01/12/2004	Autumn	W	Perugini et al., 2007_a	2007	2004	9	NA	NA	NA	NA	6.05455E-08	0.006109589	NA	1.2
871	IT	Central Adriatic Sea	37.2.1	Adriatic	43.15611	14.53944	4B	Malacostraca	Decapoda	Nephropidae	Nephrops norvegicus	Norway lobster	Nepnor	neritic mesopelagic benthic	3.67	SLB	NA	NA	NA	NA	NA	SO	BbF	HMW	Pyrolitic	WW	NA	0.00025	<LOQ	NA	<LOQ	<LOQ	NA	December 2004	01/12/2004	Autumn	W	Perugini et al., 2007_a	2007	2004	9	NA	NA	NA	NA	NA	0.006109589	NA	1.2
872	IT	Central Adriatic Sea	37.2.1	Adriatic	43.15611	14.53944	4B	Malacostraca	Decapoda	Nephropidae	Nephrops norvegicus	Norway lobster	Nepnor	neritic mesopelagic benthic	3.67	SLB	NA	NA	NA	NA	NA	SO	BkF	HMW	Pyrolitic	WW	NA	0.00005	0.00015	0.00015	0.00005	0.0003	NA	December 2004	01/12/2004	Autumn	W	Perugini et al., 2007_a	2007	2004	9	NA	NA	NA	NA	1.65124E-08	0.006109589	NA	1.2
873	IT	Central Adriatic Sea	37.2.1	Adriatic	43.15611	14.53944	4B	Malacostraca	Decapoda	Nephropidae	Nephrops norvegicus	Norway lobster	Nepnor	neritic mesopelagic benthic	3.67	SLB	NA	NA	NA	NA	NA	SO	Chr	HMW	Pyrolitic	WW	NA	0.00005	<LOQ	NA	<LOQ	<LOQ	NA	December 2004	01/12/2004	Autumn	W	Perugini et al., 2007_a	2007	2004	9	NA	NA	NA	NA	NA	0.006109589	NA	0.441455329
874	IT	Central Adriatic Sea	37.2.1	Adriatic	43.15611	14.53944	4B	Malacostraca	Decapoda	Nephropidae	Nephrops norvegicus	Norway lobster	Nepnor	neritic mesopelagic benthic	3.67	SLB	NA	NA	NA	NA	NA	SO	Fl	LMW	Petrogenic	WW	NA	0.0001	0.00113	0.00113	0.00012	0.00223	NA	December 2004	01/12/2004	Autumn	W	Perugini et al., 2007_a	2007	2004	9	2.59153E-06	2.59153E-06	2.75207E-07	5.11426E-06	NA	0.006109589	0.04	NA
875	IT	Central Adriatic Sea	37.2.1	Adriatic	43.15611	14.53944	4B	Malacostraca	Decapoda	Nephropidae	Nephrops norvegicus	Norway lobster	Nepnor	neritic mesopelagic benthic	3.67	SLB	NA	NA	NA	NA	NA	SO	Phe	LMW	Petrogenic	WW	NA	0.00005	0.00162	0.00162	0.00095	0.00297	NA	December 2004	01/12/2004	Autumn	W	Perugini et al., 2007_a	2007	2004	9	NA	NA	NA	NA	NA	0.006109589	NA	NA
876	IT	Central Adriatic Sea	37.2.1	Adriatic	43.15611	14.53944	4B	Cephalopoda	Oegopsida	Ommastrephidae	Todarodes sagittatus	European flying squid	Todsag	oceanic bathypelagic benthic	4.40	SLB	NA	NA	NA	NA	NA	SO	Ant	LMW	Petrogenic	WW	NA	0.00005	0.00012	0.00012	0.00009	0.00016	NA	December 2004	01/12/2004	Autumn	W	Perugini et al., 2007_a	2007	2004	9	6.71356E-08	6.71356E-08	5.03517E-08	8.95142E-08	NA	0.011178082	0.3	NA
877	IT	Central Adriatic Sea	37.2.1	Adriatic	43.15611	14.53944	4B	Cephalopoda	Oegopsida	Ommastrephidae	Todarodes sagittatus	European flying squid	Todsag	oceanic bathypelagic benthic	4.40	SLB	NA	NA	NA	NA	NA	SO	BaA	HMW	Pyrolitic	WW	NA	0.00005	<LOQ	NA	<LOQ	<LOQ	NA	December 2004	01/12/2004	Autumn	W	Perugini et al., 2007_a	2007	2004	9	NA	NA	NA	NA	NA	0.011178082	NA	1.2
878	IT	Central Adriatic Sea	37.2.1	Adriatic	43.15611	14.53944	4B	Cephalopoda	Oegopsida	Ommastrephidae	Todarodes sagittatus	European flying squid	Todsag	oceanic bathypelagic benthic	4.40	SLB	NA	NA	NA	NA	NA	SO	BbF	HMW	Pyrolitic	WW	NA	0.00025	<LOQ	NA	<LOQ	<LOQ	NA	December 2004	01/12/2004	Autumn	W	Perugini et al., 2007_a	2007	2004	9	NA	NA	NA	NA	NA	0.011178082	NA	1.2
879	IT	Central Adriatic Sea	37.2.1	Adriatic	43.15611	14.53944	4B	Cephalopoda	Oegopsida	Ommastrephidae	Todarodes sagittatus	European flying squid	Todsag	oceanic bathypelagic benthic	4.40	SLB	NA	NA	NA	NA	NA	SO	BkF	HMW	Pyrolitic	WW	NA	0.00005	0.00011	0.00011	0.00005	0.0002	NA	December 2004	01/12/2004	Autumn	W	Perugini et al., 2007_a	2007	2004	9	NA	NA	NA	NA	2.21548E-08	0.011178082	NA	1.2
880	IT	Central Adriatic Sea	37.2.1	Adriatic	43.15611	14.53944	4B	Cephalopoda	Oegopsida	Ommastrephidae	Todarodes sagittatus	European flying squid	Todsag	oceanic bathypelagic benthic	4.40	SLB	NA	NA	NA	NA	NA	SO	Chr	HMW	Pyrolitic	WW	NA	0.00005	<LOQ	NA	<LOQ	<LOQ	NA	December 2004	01/12/2004	Autumn	W	Perugini et al., 2007_a	2007	2004	9	NA	NA	NA	NA	NA	0.011178082	NA	0.441455329
881	IT	Central Adriatic Sea	37.2.1	Adriatic	43.15611	14.53944	4B	Cephalopoda	Oegopsida	Ommastrephidae	Todarodes sagittatus	European flying squid	Todsag	oceanic bathypelagic benthic	4.40	SLB	NA	NA	NA	NA	NA	SO	Fl	LMW	Petrogenic	WW	NA	0.0001	0.00363	0.00363	<LOQ	0.00864	NA	December 2004	01/12/2004	Autumn	W	Perugini et al., 2007_a	2007	2004	9	1.52314E-05	1.52314E-05	NA	3.62532E-05	NA	0.011178082	0.04	NA
882	IT	Central Adriatic Sea	37.2.1	Adriatic	43.15611	14.53944	4B	Cephalopoda	Oegopsida	Ommastrephidae	Todarodes sagittatus	European flying squid	Todsag	oceanic bathypelagic benthic	4.40	SLB	NA	NA	NA	NA	NA	SO	Flu	MMW	Pyrolitic	WW	NA	0.00025	0.00178	0.00178	0.00126	0.00225	NA	December 2004	01/12/2004	Autumn	W	Perugini et al., 2007_a	2007	2004	9	7.46884E-06	7.46884E-06	5.28693E-06	9.44095E-06	NA	0.011178082	0.04	NA
883	IT	Central Adriatic Sea	37.2.1	Adriatic	43.15611	14.53944	4B	Cephalopoda	Oegopsida	Ommastrephidae	Todarodes sagittatus	European flying squid	Todsag	oceanic bathypelagic benthic	4.40	SLB	NA	NA	NA	NA	NA	SO	Phe	LMW	Petrogenic	WW	NA	0.00005	0.0021	0.0021	0.00107	0.00353	NA	December 2004	01/12/2004	Autumn	W	Perugini et al., 2007_a	2007	2004	9	NA	NA	NA	NA	NA	0.011178082	NA	NA
884	IT	Central Adriatic Sea	37.2.1	Adriatic	43.15611	14.53944	4B	Bivalvia	Mytiloida	Mytilidae	Mytilus galloprovincialis	Mediterranean mussel	Mytgal	neritic epipelagic benthic	2.69	SLB	NA	NA	NA	NA	NA	SO	Ant	LMW	Petrogenic	WW	NA	0.00005	0.00039	0.00039	0.00027	0.00048	NA	December 2004	01/12/2004	Autumn	W	Perugini et al., 2007_a	2007	2004	9	2.86643E-07	2.86643E-07	1.98445E-07	3.52791E-07	NA	0.014684932	0.3	NA
885	IT	Central Adriatic Sea	37.2.1	Adriatic	43.15611	14.53944	4B	Bivalvia	Mytiloida	Mytilidae	Mytilus galloprovincialis	Mediterranean mussel	Mytgal	neritic epipelagic benthic	2.69	SLB	NA	NA	NA	NA	NA	SO	BaA	HMW	Pyrolitic	WW	NA	0.00005	0.01417	0.01417	0.01069	0.01652	NA	December 2004	01/12/2004	Autumn	W	Perugini et al., 2007_a	2007	2004	9	NA	NA	NA	NA	3.74929E-06	0.014684932	NA	1.2
886	IT	Central Adriatic Sea	37.2.1	Adriatic	43.15611	14.53944	4B	Bivalvia	Mytiloida	Mytilidae	Mytilus galloprovincialis	Mediterranean mussel	Mytgal	neritic epipelagic benthic	2.69	SLB	NA	NA	NA	NA	NA	SO	BbF	HMW	Pyrolitic	WW	NA	0.00025	0.00046	0.00046	0.00036	0.00056	NA	December 2004	01/12/2004	Autumn	W	Perugini et al., 2007_a	2007	2004	9	NA	NA	NA	NA	1.21713E-07	0.014684932	NA	1.2
887	IT	Central Adriatic Sea	37.2.1	Adriatic	43.15611	14.53944	4B	Bivalvia	Mytiloida	Mytilidae	Mytilus galloprovincialis	Mediterranean mussel	Mytgal	neritic epipelagic benthic	2.69	SLB	NA	NA	NA	NA	NA	SO	BkF	HMW	Pyrolitic	WW	NA	0.00005	0.00022	0.00022	0.00016	0.00028	NA	December 2004	01/12/2004	Autumn	W	Perugini et al., 2007_a	2007	2004	9	NA	NA	NA	NA	5.82105E-08	0.014684932	NA	1.2
888	IT	Central Adriatic Sea	37.2.1	Adriatic	43.15611	14.53944	4B	Bivalvia	Mytiloida	Mytilidae	Mytilus galloprovincialis	Mediterranean mussel	Mytgal	neritic epipelagic benthic	2.69	SLB	NA	NA	NA	NA	NA	SO	Chr	HMW	Pyrolitic	WW	NA	0.00005	0.001	0.001	0.0004	0.00155	NA	December 2004	01/12/2004	Autumn	W	Perugini et al., 2007_a	2007	2004	9	NA	NA	NA	NA	9.73385E-08	0.014684932	NA	0.441455329
889	IT	Central Adriatic Sea	37.2.1	Adriatic	43.15611	14.53944	4B	Bivalvia	Mytiloida	Mytilidae	Mytilus galloprovincialis	Mediterranean mussel	Mytgal	neritic epipelagic benthic	2.69	SLB	NA	NA	NA	NA	NA	SO	Fl	LMW	Petrogenic	WW	NA	0.0001	0.00213	0.00213	0.00167	0.00297	NA	December 2004	01/12/2004	Autumn	W	Perugini et al., 2007_a	2007	2004	9	1.17413E-05	1.17413E-05	9.20564E-06	1.63717E-05	NA	0.014684932	0.04	NA
890	IT	Central Adriatic Sea	37.2.1	Adriatic	43.15611	14.53944	4B	Bivalvia	Mytiloida	Mytilidae	Mytilus galloprovincialis	Mediterranean mussel	Mytgal	neritic epipelagic benthic	2.69	SLB	NA	NA	NA	NA	NA	SO	Flu	MMW	Pyrolitic	WW	NA	0.00025	0.01214	0.01214	0.01022	0.0131	NA	December 2004	01/12/2004	Autumn	W	Perugini et al., 2007_a	2007	2004	9	6.69201E-05	6.69201E-05	5.63363E-05	7.22119E-05	NA	0.014684932	0.04	NA
891	IT	Central Adriatic Sea	37.2.1	Adriatic	43.15611	14.53944	4B	Bivalvia	Mytiloida	Mytilidae	Mytilus galloprovincialis	Mediterranean mussel	Mytgal	neritic epipelagic benthic	2.69	SLB	NA	NA	NA	NA	NA	SO	Phe	LMW	Petrogenic	WW	NA	0.00005	0.00679	0.00679	0.00355	0.00983	NA	December 2004	01/12/2004	Autumn	W	Perugini et al., 2007_a	2007	2004	9	NA	NA	NA	NA	NA	0.014684932	NA	NA
892	IT	Central Adriatic Sea	37.2.1	Adriatic	43.15611	14.53944	4B	Actinopterygii	Gadiformes	Gadidae	Micromesistius poutassou	Blue whiting	Micpou	oceanic bathypelagic	3.70	FB	NA	NA	NA	NA	NA	FI	Ant	LMW	Petrogenic	WW	NA	0.00005	<LOQ	NA	<LOQ	<LOQ	NA	December 2004	01/12/2004	Autumn	W	Perugini et al., 2007_a	2007	2004	9	NA	NA	NA	NA	NA	0.014849315	0.3	NA
893	IT	Central Adriatic Sea	37.2.1	Adriatic	43.15611	14.53944	4B	Actinopterygii	Gadiformes	Gadidae	Micromesistius poutassou	Blue whiting	Micpou	oceanic bathypelagic	3.70	FB	NA	NA	NA	NA	NA	FI	BaA	HMW	Pyrolitic	WW	NA	0.00005	0.02037	0.02037	0.00027	0.05652	NA	December 2004	01/12/2004	Autumn	W	Perugini et al., 2007_a	2007	2004	9	NA	NA	NA	NA	5.4501E-06	0.014849315	NA	1.2
894	IT	Central Adriatic Sea	37.2.1	Adriatic	43.15611	14.53944	4B	Actinopterygii	Gadiformes	Gadidae	Micromesistius poutassou	Blue whiting	Micpou	oceanic bathypelagic	3.70	FB	NA	NA	NA	NA	NA	FI	BbF	HMW	Pyrolitic	WW	NA	0.00025	<LOQ	NA	<LOQ	<LOQ	NA	December 2004	01/12/2004	Autumn	W	Perugini et al., 2007_a	2007	2004	9	NA	NA	NA	NA	NA	0.014849315	NA	1.2
895	IT	Central Adriatic Sea	37.2.1	Adriatic	43.15611	14.53944	4B	Actinopterygii	Gadiformes	Gadidae	Micromesistius poutassou	Blue whiting	Micpou	oceanic bathypelagic	3.70	FB	NA	NA	NA	NA	NA	FI	BkF	HMW	Pyrolitic	WW	NA	0.00005	0.00049	0.00049	0.00006	0.00115	NA	December 2004	01/12/2004	Autumn	W	Perugini et al., 2007_a	2007	2004	9	NA	NA	NA	NA	1.31102E-07	0.014849315	NA	1.2
896	IT	Central Adriatic Sea	37.2.1	Adriatic	43.15611	14.53944	4B	Actinopterygii	Gadiformes	Gadidae	Micromesistius poutassou	Blue whiting	Micpou	oceanic bathypelagic	3.70	FB	NA	NA	NA	NA	NA	FI	Chr	HMW	Pyrolitic	WW	NA	0.00005	<LOQ	NA	<LOQ	<LOQ	NA	December 2004	01/12/2004	Autumn	W	Perugini et al., 2007_a	2007	2004	9	NA	NA	NA	NA	NA	0.014849315	NA	0.441455329
897	IT	Central Adriatic Sea	37.2.1	Adriatic	43.15611	14.53944	4B	Actinopterygii	Gadiformes	Gadidae	Micromesistius poutassou	Blue whiting	Micpou	oceanic bathypelagic	3.70	FB	NA	NA	NA	NA	NA	FI	Fl	LMW	Petrogenic	WW	NA	0.0001	0.02327	0.02327	0.0005	0.14719	NA	December 2004	01/12/2004	Autumn	W	Perugini et al., 2007_a	2007	2004	9	0.000129709	0.000129709	2.78703E-06	0.000820447	NA	0.014849315	0.04	NA
898	IT	Central Adriatic Sea	37.2.1	Adriatic	43.15611	14.53944	4B	Actinopterygii	Gadiformes	Gadidae	Micromesistius poutassou	Blue whiting	Micpou	oceanic bathypelagic	3.70	FB	NA	NA	NA	NA	NA	FI	Flu	MMW	Pyrolitic	WW	NA	0.00025	0.0009	0.0009	<LOQ	0.00312	NA	December 2004	01/12/2004	Autumn	W	Perugini et al., 2007_a	2007	2004	9	5.01666E-06	5.01666E-06	NA	1.73911E-05	NA	0.014849315	0.04	NA
899	IT	Central Adriatic Sea	37.2.1	Adriatic	43.15611	14.53944	4B	Actinopterygii	Gadiformes	Gadidae	Micromesistius poutassou	Blue whiting	Micpou	oceanic bathypelagic	3.70	FB	NA	NA	NA	NA	NA	FI	Phe	LMW	Petrogenic	WW	NA	0.00005	0.00063	0.00063	0.00047	0.00089	NA	December 2004	01/12/2004	Autumn	W	Perugini et al., 2007_a	2007	2004	9	NA	NA	NA	NA	NA	0.014849315	NA	NA
900	IT	Central Adriatic Sea	37.2.1	Adriatic	43.15611	14.53944	4B	Actinopterygii	Perciformes	Scombridae	Scomber scombrus	Atlantic mackerel	Scosco	oceanic mesopelagic	3.73	FB	NA	NA	NA	NA	NA	FI	Ant	LMW	Petrogenic	WW	NA	0.00005	0.00008	0.00008	<LOQ	0.00018	NA	December 2004	01/12/2004	Autumn	W	Perugini et al., 2007_a	2007	2004	9	5.94567E-08	5.94567E-08	NA	1.33778E-07	NA	0.014849315	0.3	NA
901	IT	Central Adriatic Sea	37.2.1	Adriatic	43.15611	14.53944	4B	Actinopterygii	Perciformes	Scombridae	Scomber scombrus	Atlantic mackerel	Scosco	oceanic mesopelagic	3.73	FB	NA	NA	NA	NA	NA	FI	BaA	HMW	Pyrolitic	WW	NA	0.00005	0.00082	0.00082	0.00038	0.00138	NA	December 2004	01/12/2004	Autumn	W	Perugini et al., 2007_a	2007	2004	9	NA	NA	NA	NA	2.19395E-07	0.014849315	NA	1.2
902	IT	Central Adriatic Sea	37.2.1	Adriatic	43.15611	14.53944	4B	Actinopterygii	Perciformes	Scombridae	Scomber scombrus	Atlantic mackerel	Scosco	oceanic mesopelagic	3.73	FB	NA	NA	NA	NA	NA	FI	BbF	HMW	Pyrolitic	WW	NA	0.00025	<LOQ	NA	<LOQ	<LOQ	NA	December 2004	01/12/2004	Autumn	W	Perugini et al., 2007_a	2007	2004	9	NA	NA	NA	NA	NA	0.014849315	NA	1.2
903	IT	Central Adriatic Sea	37.2.1	Adriatic	43.15611	14.53944	4B	Actinopterygii	Perciformes	Scombridae	Scomber scombrus	Atlantic mackerel	Scosco	oceanic mesopelagic	3.73	FB	NA	NA	NA	NA	NA	FI	BkF	HMW	Pyrolitic	WW	NA	0.00005	0.00007	0.00007	<LOQ	0.00011	NA	December 2004	01/12/2004	Autumn	W	Perugini et al., 2007_a	2007	2004	9	NA	NA	NA	NA	1.87289E-08	0.014849315	NA	1.2
904	IT	Central Adriatic Sea	37.2.1	Adriatic	43.15611	14.53944	4B	Actinopterygii	Perciformes	Scombridae	Scomber scombrus	Atlantic mackerel	Scosco	oceanic mesopelagic	3.73	FB	NA	NA	NA	NA	NA	FI	Chr	HMW	Pyrolitic	WW	NA	0.00005	<LOQ	NA	<LOQ	<LOQ	NA	December 2004	01/12/2004	Autumn	W	Perugini et al., 2007_a	2007	2004	9	NA	NA	NA	NA	NA	0.014849315	NA	0.441455329
905	IT	Central Adriatic Sea	37.2.1	Adriatic	43.15611	14.53944	4B	Actinopterygii	Perciformes	Scombridae	Scomber scombrus	Atlantic mackerel	Scosco	oceanic mesopelagic	3.73	FB	NA	NA	NA	NA	NA	FI	Fl	LMW	Petrogenic	WW	NA	0.0001	0.00523	0.00523	0.00012	0.02662	NA	December 2004	01/12/2004	Autumn	W	Perugini et al., 2007_a	2007	2004	9	2.91524E-05	2.91524E-05	6.68888E-07	0.000148382	NA	0.014849315	0.04	NA
906	IT	Central Adriatic Sea	37.2.1	Adriatic	43.15611	14.53944	4B	Actinopterygii	Perciformes	Scombridae	Scomber scombrus	Atlantic mackerel	Scosco	oceanic mesopelagic	3.73	FB	NA	NA	NA	NA	NA	FI	Flu	MMW	Pyrolitic	WW	NA	0.00025	0.00175	0.00175	<LOQ	0.0061	NA	December 2004	01/12/2004	Autumn	W	Perugini et al., 2007_a	2007	2004	9	9.75462E-06	9.75462E-06	NA	3.40018E-05	NA	0.014849315	0.04	NA
907	IT	Central Adriatic Sea	37.2.1	Adriatic	43.15611	14.53944	4B	Actinopterygii	Perciformes	Scombridae	Scomber scombrus	Atlantic mackerel	Scosco	oceanic mesopelagic	3.73	FB	NA	NA	NA	NA	NA	FI	Phe	LMW	Petrogenic	WW	NA	0.00005	0.00192	0.00192	0.00117	0.00338	NA	December 2004	01/12/2004	Autumn	W	Perugini et al., 2007_a	2007	2004	9	NA	NA	NA	NA	NA	0.014849315	NA	NA
908	IT	Central Adriatic Sea	37.2.1	Adriatic	43.15611	14.53944	4B	Actinopterygii	Gadiformes	Merlucciidae	Merluccius merluccius	European hake	Mermer	neritic epipelagic demersal	4.43	FB	NA	NA	NA	NA	NA	FI	Ant	LMW	Petrogenic	WW	NA	0.00005	0.00032	0.00032	<LOQ	0.0008	NA	December 2004	01/12/2004	Autumn	W	Perugini et al., 2007_a	2007	2004	9	3.40944E-07	3.40944E-07	NA	8.52359E-07	NA	0.021287671	0.3	NA
909	IT	Central Adriatic Sea	37.2.1	Adriatic	43.15611	14.53944	4B	Actinopterygii	Gadiformes	Merlucciidae	Merluccius merluccius	European hake	Mermer	neritic epipelagic demersal	4.43	FB	NA	NA	NA	NA	NA	FI	BaA	HMW	Pyrolitic	WW	NA	0.00005	0.01661	0.01661	0.00034	0.04019	NA	December 2004	01/12/2004	Autumn	W	Perugini et al., 2007_a	2007	2004	9	NA	NA	NA	NA	6.37096E-06	0.021287671	NA	1.2
910	IT	Central Adriatic Sea	37.2.1	Adriatic	43.15611	14.53944	4B	Actinopterygii	Gadiformes	Merlucciidae	Merluccius merluccius	European hake	Mermer	neritic epipelagic demersal	4.43	FB	NA	NA	NA	NA	NA	FI	BbF	HMW	Pyrolitic	WW	NA	0.00025	<LOQ	NA	<LOQ	<LOQ	NA	December 2004	01/12/2004	Autumn	W	Perugini et al., 2007_a	2007	2004	9	NA	NA	NA	NA	NA	0.021287671	NA	1.2
911	IT	Central Adriatic Sea	37.2.1	Adriatic	43.15611	14.53944	4B	Actinopterygii	Gadiformes	Merlucciidae	Merluccius merluccius	European hake	Mermer	neritic epipelagic demersal	4.43	FB	NA	NA	NA	NA	NA	FI	BkF	HMW	Pyrolitic	WW	NA	0.00005	0.00031	0.00031	0.0001	0.00052	NA	December 2004	01/12/2004	Autumn	W	Perugini et al., 2007_a	2007	2004	9	NA	NA	NA	NA	1.18904E-07	0.021287671	NA	1.2
912	IT	Central Adriatic Sea	37.2.1	Adriatic	43.15611	14.53944	4B	Actinopterygii	Gadiformes	Merlucciidae	Merluccius merluccius	European hake	Mermer	neritic epipelagic demersal	4.43	FB	NA	NA	NA	NA	NA	FI	Chr	HMW	Pyrolitic	WW	NA	0.00005	<LOQ	NA	<LOQ	<LOQ	NA	December 2004	01/12/2004	Autumn	W	Perugini et al., 2007_a	2007	2004	9	NA	NA	NA	NA	NA	0.021287671	NA	0.441455329
913	IT	Central Adriatic Sea	37.2.1	Adriatic	43.15611	14.53944	4B	Actinopterygii	Gadiformes	Merlucciidae	Merluccius merluccius	European hake	Mermer	neritic epipelagic demersal	4.43	FB	NA	NA	NA	NA	NA	FI	Fl	LMW	Petrogenic	WW	NA	0.0001	0.02726	0.02726	0.00042	0.16207	NA	December 2004	01/12/2004	Autumn	W	Perugini et al., 2007_a	2007	2004	9	0.000217831	0.000217831	3.35616E-06	0.00129508	NA	0.021287671	0.04	NA
914	IT	Central Adriatic Sea	37.2.1	Adriatic	43.15611	14.53944	4B	Actinopterygii	Gadiformes	Merlucciidae	Merluccius merluccius	European hake	Mermer	neritic epipelagic demersal	4.43	FB	NA	NA	NA	NA	NA	FI	Flu	MMW	Pyrolitic	WW	NA	0.00025	0.00756	0.00756	0.00532	0.00912	NA	December 2004	01/12/2004	Autumn	W	Perugini et al., 2007_a	2007	2004	9	6.0411E-05	6.0411E-05	4.25114E-05	7.28767E-05	NA	0.021287671	0.04	NA
915	IT	Central Adriatic Sea	37.2.1	Adriatic	43.15611	14.53944	4B	Actinopterygii	Gadiformes	Merlucciidae	Merluccius merluccius	European hake	Mermer	neritic epipelagic demersal	4.43	FB	NA	NA	NA	NA	NA	FI	Phe	LMW	Petrogenic	WW	NA	0.00005	0.00193	0.00193	0.00048	0.00895	NA	December 2004	01/12/2004	Autumn	W	Perugini et al., 2007_a	2007	2004	9	NA	NA	NA	NA	NA	0.021287671	NA	NA
916	IT	Central Adriatic Sea	37.2.1	Adriatic	43.15611	14.53944	4B	Actinopterygii	Perciformes	Mullidae	Mullus barbatus	Red mullet	Mulbar	neritic mesopelagic demersal	3.24	FB	NA	NA	NA	NA	NA	FI	Ant	LMW	Petrogenic	WW	NA	0.00005	0.00016	0.00016	0.00005	0.00065	NA	December 2004	01/12/2004	Autumn	W	Perugini et al., 2007_a	2007	2004	9	1.70472E-07	1.70472E-07	5.32725E-08	6.92542E-07	NA	0.021287671	0.3	NA
917	IT	Central Adriatic Sea	37.2.1	Adriatic	43.15611	14.53944	4B	Actinopterygii	Perciformes	Mullidae	Mullus barbatus	Red mullet	Mulbar	neritic mesopelagic demersal	3.24	FB	NA	NA	NA	NA	NA	FI	BaA	HMW	Pyrolitic	WW	NA	0.00005	0.00539	0.00539	0.00152	0.00778	NA	December 2004	01/12/2004	Autumn	W	Perugini et al., 2007_a	2007	2004	9	NA	NA	NA	NA	2.0674E-06	0.021287671	NA	1.2
918	IT	Central Adriatic Sea	37.2.1	Adriatic	43.15611	14.53944	4B	Actinopterygii	Perciformes	Mullidae	Mullus barbatus	Red mullet	Mulbar	neritic mesopelagic demersal	3.24	FB	NA	NA	NA	NA	NA	FI	BbF	HMW	Pyrolitic	WW	NA	0.00025	0.00066	0.00066	<LOQ	0.00109	NA	December 2004	01/12/2004	Autumn	W	Perugini et al., 2007_a	2007	2004	9	NA	NA	NA	NA	2.53151E-07	0.021287671	NA	1.2
919	IT	Central Adriatic Sea	37.2.1	Adriatic	43.15611	14.53944	4B	Actinopterygii	Perciformes	Mullidae	Mullus barbatus	Red mullet	Mulbar	neritic mesopelagic demersal	3.24	FB	NA	NA	NA	NA	NA	FI	BkF	HMW	Pyrolitic	WW	NA	0.00005	0.0001	0.0001	<LOQ	0.00015	NA	December 2004	01/12/2004	Autumn	W	Perugini et al., 2007_a	2007	2004	9	NA	NA	NA	NA	3.83562E-08	0.021287671	NA	1.2
920	IT	Central Adriatic Sea	37.2.1	Adriatic	43.15611	14.53944	4B	Actinopterygii	Perciformes	Mullidae	Mullus barbatus	Red mullet	Mulbar	neritic mesopelagic demersal	3.24	FB	NA	NA	NA	NA	NA	FI	Chr	HMW	Pyrolitic	WW	NA	0.00005	<LOQ	NA	<LOQ	<LOQ	NA	December 2004	01/12/2004	Autumn	W	Perugini et al., 2007_a	2007	2004	9	NA	NA	NA	NA	NA	0.021287671	NA	0.441455329
921	IT	Central Adriatic Sea	37.2.1	Adriatic	43.15611	14.53944	4B	Actinopterygii	Perciformes	Mullidae	Mullus barbatus	Red mullet	Mulbar	neritic mesopelagic demersal	3.24	FB	NA	NA	NA	NA	NA	FI	Fl	LMW	Petrogenic	WW	NA	0.0001	0.00236	0.00236	0.00073	0.00708	NA	December 2004	01/12/2004	Autumn	W	Perugini et al., 2007_a	2007	2004	9	1.88584E-05	1.88584E-05	5.83333E-06	5.65753E-05	NA	0.021287671	0.04	NA
922	IT	Central Adriatic Sea	37.2.1	Adriatic	43.15611	14.53944	4B	Actinopterygii	Perciformes	Mullidae	Mullus barbatus	Red mullet	Mulbar	neritic mesopelagic demersal	3.24	FB	NA	NA	NA	NA	NA	FI	Flu	MMW	Pyrolitic	WW	NA	0.00025	0.00364	0.00364	0.00245	0.00478	NA	December 2004	01/12/2004	Autumn	W	Perugini et al., 2007_a	2007	2004	9	2.90868E-05	2.90868E-05	1.95776E-05	3.81963E-05	NA	0.021287671	0.04	NA
923	IT	Central Adriatic Sea	37.2.1	Adriatic	43.15611	14.53944	4B	Actinopterygii	Perciformes	Mullidae	Mullus barbatus	Red mullet	Mulbar	neritic mesopelagic demersal	3.24	FB	NA	NA	NA	NA	NA	FI	Phe	LMW	Petrogenic	WW	NA	0.00005	0.00388	0.00388	0.00115	0.01479	NA	December 2004	01/12/2004	Autumn	W	Perugini et al., 2007_a	2007	2004	9	NA	NA	NA	NA	NA	0.021287671	NA	NA
924	IT	Central Adriatic Sea	37.2.1	Adriatic	43.15611	14.53944	4B	Malacostraca	Decapoda	Nephropidae	Nephrops norvegicus	Norway lobster	Nepnor	neritic mesopelagic benthic	3.67	SLB	NA	NA	NA	NA	NA	SO	Flu	MMW	Pyrolitic	WW	0.00021	0.00017	0.00067	0.00067	0.0003	0.00096	NA	December 2004	01/12/2004	Autumn	W	Perugini et al., 2007	2007	2004	10	1.53657E-06	1.53657E-06	6.88017E-07	2.20165E-06	NA	0.006109589	0.04	NA
925	IT	Gulf of Naples	37.1.3	Tyrrhenian	40.69191	14.17448	2	Malacostraca	Decapoda	Aristeidae	Aristeus antennatus	Blue and red shrimp	Ariant	oceanic bathypelagic demersal	3.30	SLB	NA	NA	NA	NA	NA	SO	Ant	LMW	Petrogenic	WW	0.00015	0.00013	0.0019	0.0019	0.00131	0.00283	NA	July 2004	01/07/2004	Summer	W	Perugini et al., 2007	2007	2004	10	5.86203E-07	5.86203E-07	4.04171E-07	8.73133E-07	NA	0.006164384	0.3	NA
926	IT	Gulf of Naples	37.1.3	Tyrrhenian	40.69191	14.17448	2	Malacostraca	Decapoda	Aristeidae	Aristeus antennatus	Blue and red shrimp	Ariant	oceanic bathypelagic demersal	3.30	SLB	NA	NA	NA	NA	NA	SO	BaA	HMW	Pyrolitic	WW	0.00015	0.00012	0.00394	0.00394	0.00325	0.0054	NA	July 2004	01/07/2004	Summer	W	Perugini et al., 2007	2007	2004	10	NA	NA	NA	NA	4.37616E-07	0.006164384	NA	1.2
927	IT	Gulf of Naples	37.1.3	Tyrrhenian	40.69191	14.17448	2	Malacostraca	Decapoda	Aristeidae	Aristeus antennatus	Blue and red shrimp	Ariant	oceanic bathypelagic demersal	3.30	SLB	NA	NA	NA	NA	NA	SO	BaP	HMW	Pyrolitic	WW	0.0001	0.00007	<LOQ	0.00005	<LOQ	<LOQ	NA	July 2004	01/07/2004	Summer	W	Perugini et al., 2007	2007	2004	10	NA	1.54264E-05	NA	NA	1.3421E-08	0.006164384	0.0003	2.9
928	IT	Gulf of Naples	37.1.3	Tyrrhenian	40.69191	14.17448	2	Malacostraca	Decapoda	Aristeidae	Aristeus antennatus	Blue and red shrimp	Ariant	oceanic bathypelagic demersal	3.30	SLB	NA	NA	NA	NA	NA	SO	BbF	HMW	Pyrolitic	WW	0.00006	0.00005	<LOQ	0.00003	<LOQ	<LOQ	NA	July 2004	01/07/2004	Summer	W	Perugini et al., 2007	2007	2004	10	NA	NA	NA	NA	3.3321E-09	0.006164384	NA	1.2
929	IT	Gulf of Naples	37.1.3	Tyrrhenian	40.69191	14.17448	2	Malacostraca	Decapoda	Aristeidae	Aristeus antennatus	Blue and red shrimp	Ariant	oceanic bathypelagic demersal	3.30	SLB	NA	NA	NA	NA	NA	SO	BghiP	HMW	Pyrolitic	WW	0.00024	0.00016	<LOQ	0.00012	<LOQ	<LOQ	NA	July 2004	01/07/2004	Summer	W	Perugini et al., 2007	2007	2004	10	NA	NA	NA	NA	NA	0.006164384	NA	NA
930	IT	Gulf of Naples	37.1.3	Tyrrhenian	40.69191	14.17448	2	Malacostraca	Decapoda	Aristeidae	Aristeus antennatus	Blue and red shrimp	Ariant	oceanic bathypelagic demersal	3.30	SLB	NA	NA	NA	NA	NA	SO	BkF	HMW	Pyrolitic	WW	0.00002	0.00001	0.00222	0.00222	0.00142	0.00303	NA	July 2004	01/07/2004	Summer	W	Perugini et al., 2007	2007	2004	10	NA	NA	NA	NA	2.46575E-07	0.006164384	NA	1.2
931	IT	Gulf of Naples	37.1.3	Tyrrhenian	40.69191	14.17448	2	Malacostraca	Decapoda	Aristeidae	Aristeus antennatus	Blue and red shrimp	Ariant	oceanic bathypelagic demersal	3.30	SLB	NA	NA	NA	NA	NA	SO	Chr	HMW	Pyrolitic	WW	0.00018	0.00016	0.00045	0.00045	0.00022	0.00063	NA	July 2004	01/07/2004	Summer	W	Perugini et al., 2007	2007	2004	10	NA	NA	NA	NA	1.83872E-08	0.006164384	NA	0.441455329
932	IT	Gulf of Naples	37.1.3	Tyrrhenian	40.69191	14.17448	2	Malacostraca	Decapoda	Aristeidae	Aristeus antennatus	Blue and red shrimp	Ariant	oceanic bathypelagic demersal	3.30	SLB	NA	NA	NA	NA	NA	SO	DahA	HMW	Pyrolitic	WW	0.00008	0.00006	<LOQ	0.00004	<LOQ	<LOQ	NA	July 2004	01/07/2004	Summer	W	Perugini et al., 2007	2007	2004	10	NA	NA	NA	NA	1.51796E-08	0.006164384	NA	4.1
933	IT	Gulf of Naples	37.1.3	Tyrrhenian	40.69191	14.17448	2	Malacostraca	Decapoda	Aristeidae	Aristeus antennatus	Blue and red shrimp	Ariant	oceanic bathypelagic demersal	3.30	SLB	NA	NA	NA	NA	NA	SO	Flu	MMW	Pyrolitic	WW	0.00021	0.00017	0.00114	0.00114	0.00083	0.00162	NA	July 2004	01/07/2004	Summer	W	Perugini et al., 2007	2007	2004	10	2.63791E-06	2.63791E-06	1.92058E-06	3.74861E-06	NA	0.006164384	0.04	NA
934	IT	Gulf of Naples	37.1.3	Tyrrhenian	40.69191	14.17448	2	Malacostraca	Decapoda	Aristeidae	Aristeus antennatus	Blue and red shrimp	Ariant	oceanic bathypelagic demersal	3.30	SLB	NA	NA	NA	NA	NA	SO	InP	HMW	Pyrolitic	WW	0.00026	0.00021	<LOQ	0.00013	<LOQ	<LOQ	NA	July 2004	01/07/2004	Summer	W	Perugini et al., 2007	2007	2004	10	NA	NA	NA	NA	1.44391E-08	0.006164384	NA	1.2
935	IT	Gulf of Naples	37.1.3	Tyrrhenian	40.69191	14.17448	2	Malacostraca	Decapoda	Aristeidae	Aristeus antennatus	Blue and red shrimp	Ariant	oceanic bathypelagic demersal	3.30	SLB	NA	NA	NA	NA	NA	SO	Pyr	MMW	Pyrolitic	WW	0.00062	0.00049	0.00362	0.00362	0.00181	0.00578	NA	July 2004	01/07/2004	Summer	W	Perugini et al., 2007	2007	2004	10	1.11687E-05	1.11687E-05	5.58435E-06	1.78329E-05	NA	0.006164384	0.03	NA
936	IT	Gulf of Naples	37.1.3	Tyrrhenian	40.69191	14.17448	2	Cephalopoda	Oegopsida	Ommastrephidae	Todarodes sagittatus	European flying squid	Todsag	oceanic bathypelagic benthic	4.40	SLB	NA	NA	NA	NA	NA	SO	Ant	LMW	Petrogenic	WW	0.00015	0.00013	0.00367	0.00367	0.00275	0.00435	NA	July 2004	01/07/2004	Summer	W	Perugini et al., 2007	2007	2004	10	2.05323E-06	2.05323E-06	1.53852E-06	2.43367E-06	NA	0.011178082	0.3	NA
937	IT	Gulf of Naples	37.1.3	Tyrrhenian	40.69191	14.17448	2	Cephalopoda	Oegopsida	Ommastrephidae	Todarodes sagittatus	European flying squid	Todsag	oceanic bathypelagic benthic	4.40	SLB	NA	NA	NA	NA	NA	SO	BaA	HMW	Pyrolitic	WW	0.00015	0.00012	0.00252	0.00252	0.00146	0.00347	NA	July 2004	01/07/2004	Summer	W	Perugini et al., 2007	2007	2004	10	NA	NA	NA	NA	5.07545E-07	0.011178082	NA	1.2
938	IT	Gulf of Naples	37.1.3	Tyrrhenian	40.69191	14.17448	2	Cephalopoda	Oegopsida	Ommastrephidae	Todarodes sagittatus	European flying squid	Todsag	oceanic bathypelagic benthic	4.40	SLB	NA	NA	NA	NA	NA	SO	BaP	HMW	Pyrolitic	WW	0.0001	0.00007	<LOQ	0.00005	<LOQ	0	NA	July 2004	01/07/2004	Summer	W	Perugini et al., 2007	2007	2004	10	NA	2.79732E-05	NA	0	2.43367E-08	0.011178082	0.0003	2.9
939	IT	Gulf of Naples	37.1.3	Tyrrhenian	40.69191	14.17448	2	Cephalopoda	Oegopsida	Ommastrephidae	Todarodes sagittatus	European flying squid	Todsag	oceanic bathypelagic benthic	4.40	SLB	NA	NA	NA	NA	NA	SO	BbF	HMW	Pyrolitic	WW	0.00006	0.00005	0.00121	0.00121	0.00077	0.00189	NA	July 2004	01/07/2004	Summer	W	Perugini et al., 2007	2007	2004	10	NA	NA	NA	NA	2.43702E-07	0.011178082	NA	1.2
940	IT	Gulf of Naples	37.1.3	Tyrrhenian	40.69191	14.17448	2	Cephalopoda	Oegopsida	Ommastrephidae	Todarodes sagittatus	European flying squid	Todsag	oceanic bathypelagic benthic	4.40	SLB	NA	NA	NA	NA	NA	SO	BghiP	HMW	Pyrolitic	WW	0.00024	0.00016	<LOQ	0.00012	<LOQ	0	NA	July 2004	01/07/2004	Summer	W	Perugini et al., 2007	2007	2004	10	NA	NA	NA	NA	NA	0.011178082	NA	NA
941	IT	Gulf of Naples	37.1.3	Tyrrhenian	40.69191	14.17448	2	Cephalopoda	Oegopsida	Ommastrephidae	Todarodes sagittatus	European flying squid	Todsag	oceanic bathypelagic benthic	4.40	SLB	NA	NA	NA	NA	NA	SO	BkF	HMW	Pyrolitic	WW	0.00002	0.00001	0.00182	0.00182	0.00156	0.00224	NA	July 2004	01/07/2004	Summer	W	Perugini et al., 2007	2007	2004	10	NA	NA	NA	NA	3.66561E-07	0.011178082	NA	1.2
942	IT	Gulf of Naples	37.1.3	Tyrrhenian	40.69191	14.17448	2	Cephalopoda	Oegopsida	Ommastrephidae	Todarodes sagittatus	European flying squid	Todsag	oceanic bathypelagic benthic	4.40	SLB	NA	NA	NA	NA	NA	SO	Chr	HMW	Pyrolitic	WW	0.00018	0.00016	<LOQ	0.00009	<LOQ	0	NA	July 2004	01/07/2004	Summer	W	Perugini et al., 2007	2007	2004	10	NA	NA	NA	NA	6.66841E-09	0.011178082	NA	0.441455329
943	IT	Gulf of Naples	37.1.3	Tyrrhenian	40.69191	14.17448	2	Cephalopoda	Oegopsida	Ommastrephidae	Todarodes sagittatus	European flying squid	Todsag	oceanic bathypelagic benthic	4.40	SLB	NA	NA	NA	NA	NA	SO	DahA	HMW	Pyrolitic	WW	0.00008	0.00006	<LOQ	0.00004	<LOQ	0	NA	July 2004	01/07/2004	Summer	W	Perugini et al., 2007	2007	2004	10	NA	NA	NA	NA	2.75256E-08	0.011178082	NA	4.1
944	IT	Gulf of Naples	37.1.3	Tyrrhenian	40.69191	14.17448	2	Cephalopoda	Oegopsida	Ommastrephidae	Todarodes sagittatus	European flying squid	Todsag	oceanic bathypelagic benthic	4.40	SLB	NA	NA	NA	NA	NA	SO	Flu	MMW	Pyrolitic	WW	0.00021	0.00017	0.00224	0.00224	0.00127	0.00303	NA	July 2004	01/07/2004	Summer	W	Perugini et al., 2007	2007	2004	10	9.39899E-06	9.39899E-06	5.32889E-06	1.27138E-05	NA	0.011178082	0.04	NA
945	IT	Gulf of Naples	37.1.3	Tyrrhenian	40.69191	14.17448	2	Cephalopoda	Oegopsida	Ommastrephidae	Todarodes sagittatus	European flying squid	Todsag	oceanic bathypelagic benthic	4.40	SLB	NA	NA	NA	NA	NA	SO	InP	HMW	Pyrolitic	WW	0.00026	0.00021	<LOQ	0.00013	<LOQ	0	NA	July 2004	01/07/2004	Summer	W	Perugini et al., 2007	2007	2004	10	NA	NA	NA	NA	2.61829E-08	0.011178082	NA	1.2
946	IT	Gulf of Naples	37.1.3	Tyrrhenian	40.69191	14.17448	2	Cephalopoda	Oegopsida	Ommastrephidae	Todarodes sagittatus	European flying squid	Todsag	oceanic bathypelagic benthic	4.40	SLB	NA	NA	NA	NA	NA	SO	Pyr	MMW	Pyrolitic	WW	0.00062	0.00049	0.00492	0.00492	0.00326	0.00723	NA	July 2004	01/07/2004	Summer	W	Perugini et al., 2007	2007	2004	10	2.75256E-05	2.75256E-05	1.82385E-05	4.04492E-05	NA	0.011178082	0.03	NA
947	IT	Gulf of Naples	37.1.3	Tyrrhenian	40.69191	14.17448	2	Bivalvia	Mytiloida	Mytilidae	Mytilus galloprovincialis	Mediterranean mussel	Mytgal	neritic epipelagic benthic	2.69	SLB	NA	NA	NA	NA	NA	SO	Ant	LMW	Petrogenic	WW	0.00015	0.00013	0.0136	0.0136	0.00939	0.01662	NA	July 2004	01/07/2004	Summer	W	Perugini et al., 2007	2007	2004	10	9.99575E-06	9.99575E-06	6.90148E-06	1.22154E-05	NA	0.014684932	0.3	NA
948	IT	Gulf of Naples	37.1.3	Tyrrhenian	40.69191	14.17448	2	Bivalvia	Mytiloida	Mytilidae	Mytilus galloprovincialis	Mediterranean mussel	Mytgal	neritic epipelagic benthic	2.69	SLB	NA	NA	NA	NA	NA	SO	BaA	HMW	Pyrolitic	WW	0.00015	0.00012	0.00146	0.00146	0.00044	0.00196	NA	July 2004	01/07/2004	Summer	W	Perugini et al., 2007	2007	2004	10	NA	NA	NA	NA	3.86306E-07	0.014684932	NA	1.2
949	IT	Gulf of Naples	37.1.3	Tyrrhenian	40.69191	14.17448	2	Bivalvia	Mytiloida	Mytilidae	Mytilus galloprovincialis	Mediterranean mussel	Mytgal	neritic epipelagic benthic	2.69	SLB	NA	NA	NA	NA	NA	SO	BaP	HMW	Pyrolitic	WW	0.0001	0.00007	0.00161	0.00161	0.00031	0.00267	NA	July 2004	01/07/2004	Summer	W	Perugini et al., 2007	2007	2004	10	0.00118332	0.00118332	0.000227844	0.001962401	1.02949E-06	0.014684932	0.0003	2.9
950	IT	Gulf of Naples	37.1.3	Tyrrhenian	40.69191	14.17448	2	Bivalvia	Mytiloida	Mytilidae	Mytilus galloprovincialis	Mediterranean mussel	Mytgal	neritic epipelagic benthic	2.69	SLB	NA	NA	NA	NA	NA	SO	BbF	HMW	Pyrolitic	WW	0.00006	0.00005	0.00952	0.00952	0.00258	0.01471	NA	July 2004	01/07/2004	Summer	W	Perugini et al., 2007	2007	2004	10	NA	NA	NA	NA	2.51893E-06	0.014684932	NA	1.2
951	IT	Gulf of Naples	37.1.3	Tyrrhenian	40.69191	14.17448	2	Bivalvia	Mytiloida	Mytilidae	Mytilus galloprovincialis	Mediterranean mussel	Mytgal	neritic epipelagic benthic	2.69	SLB	NA	NA	NA	NA	NA	SO	BghiP	HMW	Pyrolitic	WW	0.00024	0.00016	0.0046	0.0046	<LOQ	0.00737	NA	July 2004	01/07/2004	Summer	W	Perugini et al., 2007	2007	2004	10	NA	NA	NA	NA	NA	0.014684932	NA	NA
952	IT	Gulf of Naples	37.1.3	Tyrrhenian	40.69191	14.17448	2	Bivalvia	Mytiloida	Mytilidae	Mytilus galloprovincialis	Mediterranean mussel	Mytgal	neritic epipelagic benthic	2.69	SLB	NA	NA	NA	NA	NA	SO	BkF	HMW	Pyrolitic	WW	0.00002	0.00001	0.00241	0.00241	0.00068	0.0038	NA	July 2004	01/07/2004	Summer	W	Perugini et al., 2007	2007	2004	10	NA	NA	NA	NA	6.3767E-07	0.014684932	NA	1.2
953	IT	Gulf of Naples	37.1.3	Tyrrhenian	40.69191	14.17448	2	Bivalvia	Mytiloida	Mytilidae	Mytilus galloprovincialis	Mediterranean mussel	Mytgal	neritic epipelagic benthic	2.69	SLB	NA	NA	NA	NA	NA	SO	Chr	HMW	Pyrolitic	WW	0.00018	0.00016	0.00474	0.00474	0.0006	0.00822	NA	July 2004	01/07/2004	Summer	W	Perugini et al., 2007	2007	2004	10	NA	NA	NA	NA	4.61384E-07	0.014684932	NA	0.441455329
954	IT	Gulf of Naples	37.1.3	Tyrrhenian	40.69191	14.17448	2	Bivalvia	Mytiloida	Mytilidae	Mytilus galloprovincialis	Mediterranean mussel	Mytgal	neritic epipelagic benthic	2.69	SLB	NA	NA	NA	NA	NA	SO	DahA	HMW	Pyrolitic	WW	0.00008	0.00006	0.00045	0.00045	<LOQ	0.00096	NA	July 2004	01/07/2004	Summer	W	Perugini et al., 2007	2007	2004	10	NA	NA	NA	NA	4.06812E-07	0.014684932	NA	4.1
955	IT	Gulf of Naples	37.1.3	Tyrrhenian	40.69191	14.17448	2	Bivalvia	Mytiloida	Mytilidae	Mytilus galloprovincialis	Mediterranean mussel	Mytgal	neritic epipelagic benthic	2.69	SLB	NA	NA	NA	NA	NA	SO	Flu	MMW	Pyrolitic	WW	0.00021	0.00017	0.01245	0.01245	0.00947	0.01473	NA	July 2004	01/07/2004	Summer	W	Perugini et al., 2007	2007	2004	10	6.86289E-05	6.86289E-05	5.22021E-05	8.11971E-05	NA	0.014684932	0.04	NA
956	IT	Gulf of Naples	37.1.3	Tyrrhenian	40.69191	14.17448	2	Bivalvia	Mytiloida	Mytilidae	Mytilus galloprovincialis	Mediterranean mussel	Mytgal	neritic epipelagic benthic	2.69	SLB	NA	NA	NA	NA	NA	SO	InP	HMW	Pyrolitic	WW	0.00026	0.00021	0.00353	0.00353	0.00157	0.00595	NA	July 2004	01/07/2004	Summer	W	Perugini et al., 2007	2007	2004	10	NA	NA	NA	NA	9.34015E-07	0.014684932	NA	1.2
957	IT	Gulf of Naples	37.1.3	Tyrrhenian	40.69191	14.17448	2	Bivalvia	Mytiloida	Mytilidae	Mytilus galloprovincialis	Mediterranean mussel	Mytgal	neritic epipelagic benthic	2.69	SLB	NA	NA	NA	NA	NA	SO	Pyr	MMW	Pyrolitic	WW	0.00062	0.00049	0.02323	0.02323	0.01644	0.02995	NA	July 2004	01/07/2004	Summer	W	Perugini et al., 2007	2007	2004	10	0.000170736	0.000170736	0.000120831	0.000220127	NA	0.014684932	0.03	NA
958	IT	Gulf of Naples	37.1.3	Tyrrhenian	40.69191	14.17448	2	Actinopterygii	Gadiformes	Gadidae	Micromesistius poutassou	Blue whiting	Micpou	oceanic bathypelagic	3.70	FB	NA	NA	NA	NA	NA	FI	Ant	LMW	Petrogenic	WW	0.00015	0.00013	0.00336	0.00336	0.00042	0.00547	NA	July 2004	01/07/2004	Summer	W	Perugini et al., 2007	2007	2004	10	2.49718E-06	2.49718E-06	3.12148E-07	4.06535E-06	NA	0.014849315	0.3	NA
959	IT	Gulf of Naples	37.1.3	Tyrrhenian	40.69191	14.17448	2	Actinopterygii	Gadiformes	Gadidae	Micromesistius poutassou	Blue whiting	Micpou	oceanic bathypelagic	3.70	FB	NA	NA	NA	NA	NA	FI	BaA	HMW	Pyrolitic	WW	0.00015	0.00012	0.00357	0.00357	0.00277	0.00453	NA	July 2004	01/07/2004	Summer	W	Perugini et al., 2007	2007	2004	10	NA	NA	NA	NA	9.55172E-07	0.014849315	NA	1.2
960	IT	Gulf of Naples	37.1.3	Tyrrhenian	40.69191	14.17448	2	Actinopterygii	Gadiformes	Gadidae	Micromesistius poutassou	Blue whiting	Micpou	oceanic bathypelagic	3.70	FB	NA	NA	NA	NA	NA	FI	BaP	HMW	Pyrolitic	WW	0.0001	0.00007	<LOQ	0.00005	<LOQ	<LOQ	NA	July 2004	01/07/2004	Summer	W	Perugini et al., 2007	2007	2004	10	NA	3.71604E-05	NA	NA	3.23296E-08	0.014849315	0.0003	2.9
961	IT	Gulf of Naples	37.1.3	Tyrrhenian	40.69191	14.17448	2	Actinopterygii	Gadiformes	Gadidae	Micromesistius poutassou	Blue whiting	Micpou	oceanic bathypelagic	3.70	FB	NA	NA	NA	NA	NA	FI	BbF	HMW	Pyrolitic	WW	0.00006	0.00005	0.00324	0.00324	0.00266	0.00411	NA	July 2004	01/07/2004	Summer	W	Perugini et al., 2007	2007	2004	10	NA	NA	NA	NA	8.66879E-07	0.014849315	NA	1.2
962	IT	Gulf of Naples	37.1.3	Tyrrhenian	40.69191	14.17448	2	Actinopterygii	Gadiformes	Gadidae	Micromesistius poutassou	Blue whiting	Micpou	oceanic bathypelagic	3.70	FB	NA	NA	NA	NA	NA	FI	BghiP	HMW	Pyrolitic	WW	0.00024	0.00016	<LOQ	0.00012	<LOQ	<LOQ	NA	July 2004	01/07/2004	Summer	W	Perugini et al., 2007	2007	2004	10	NA	NA	NA	NA	NA	0.014849315	NA	NA
963	IT	Gulf of Naples	37.1.3	Tyrrhenian	40.69191	14.17448	2	Actinopterygii	Gadiformes	Gadidae	Micromesistius poutassou	Blue whiting	Micpou	oceanic bathypelagic	3.70	FB	NA	NA	NA	NA	NA	FI	BkF	HMW	Pyrolitic	WW	0.00002	0.00001	0.00111	0.00111	0.0007	0.00138	NA	July 2004	01/07/2004	Summer	W	Perugini et al., 2007	2007	2004	10	NA	NA	NA	NA	2.96986E-07	0.014849315	NA	1.2
964	IT	Gulf of Naples	37.1.3	Tyrrhenian	40.69191	14.17448	2	Actinopterygii	Gadiformes	Gadidae	Micromesistius poutassou	Blue whiting	Micpou	oceanic bathypelagic	3.70	FB	NA	NA	NA	NA	NA	FI	Chr	HMW	Pyrolitic	WW	0.00018	0.00016	0.00076	0.00076	0.00034	0.00111	NA	July 2004	01/07/2004	Summer	W	Perugini et al., 2007	2007	2004	10	NA	NA	NA	NA	7.48053E-08	0.014849315	NA	0.441455329
965	IT	Gulf of Naples	37.1.3	Tyrrhenian	40.69191	14.17448	2	Actinopterygii	Gadiformes	Gadidae	Micromesistius poutassou	Blue whiting	Micpou	oceanic bathypelagic	3.70	FB	NA	NA	NA	NA	NA	FI	DahA	HMW	Pyrolitic	WW	0.00008	0.00006	<LOQ	0.00004	<LOQ	<LOQ	NA	July 2004	01/07/2004	Summer	W	Perugini et al., 2007	2007	2004	10	NA	NA	NA	NA	3.65659E-08	0.014849315	NA	4.1
966	IT	Gulf of Naples	37.1.3	Tyrrhenian	40.69191	14.17448	2	Actinopterygii	Gadiformes	Gadidae	Micromesistius poutassou	Blue whiting	Micpou	oceanic bathypelagic	3.70	FB	NA	NA	NA	NA	NA	FI	Flu	MMW	Pyrolitic	WW	0.00021	0.00017	0.00107	0.00107	0.00074	0.0012	NA	July 2004	01/07/2004	Summer	W	Perugini et al., 2007	2007	2004	10	5.96425E-06	5.96425E-06	4.12481E-06	6.68888E-06	NA	0.014849315	0.04	NA
967	IT	Gulf of Naples	37.1.3	Tyrrhenian	40.69191	14.17448	2	Actinopterygii	Gadiformes	Gadidae	Micromesistius poutassou	Blue whiting	Micpou	oceanic bathypelagic	3.70	FB	NA	NA	NA	NA	NA	FI	InP	HMW	Pyrolitic	WW	0.00026	0.00021	<LOQ	0.00013	<LOQ	<LOQ	NA	July 2004	01/07/2004	Summer	W	Perugini et al., 2007	2007	2004	10	NA	NA	NA	NA	3.47822E-08	0.014849315	NA	1.2
968	IT	Gulf of Naples	37.1.3	Tyrrhenian	40.69191	14.17448	2	Actinopterygii	Gadiformes	Gadidae	Micromesistius poutassou	Blue whiting	Micpou	oceanic bathypelagic	3.70	FB	NA	NA	NA	NA	NA	FI	Pyr	MMW	Pyrolitic	WW	0.00062	0.00049	0.003	0.003	0.00102	0.00426	NA	July 2004	01/07/2004	Summer	W	Perugini et al., 2007	2007	2004	10	2.22963E-05	2.22963E-05	7.58073E-06	3.16607E-05	NA	0.014849315	0.03	NA
969	IT	Gulf of Naples	37.1.3	Tyrrhenian	40.69191	14.17448	2	Actinopterygii	Perciformes	Scombridae	Scomber scombrus	Atlantic mackerel	Scosco	oceanic mesopelagic	3.73	FB	NA	NA	NA	NA	NA	FI	Ant	LMW	Petrogenic	WW	0.00015	0.00013	0.00282	0.00282	0.0018	0.00403	NA	July 2004	01/07/2004	Summer	W	Perugini et al., 2007	2007	2004	10	2.09585E-06	2.09585E-06	1.33778E-06	2.99513E-06	NA	0.014849315	0.3	NA
970	IT	Gulf of Naples	37.1.3	Tyrrhenian	40.69191	14.17448	2	Actinopterygii	Perciformes	Scombridae	Scomber scombrus	Atlantic mackerel	Scosco	oceanic mesopelagic	3.73	FB	NA	NA	NA	NA	NA	FI	BaA	HMW	Pyrolitic	WW	0.00015	0.00012	0.00145	0.00145	0.0009	0.0021	NA	July 2004	01/07/2004	Summer	W	Perugini et al., 2007	2007	2004	10	NA	NA	NA	NA	3.87955E-07	0.014849315	NA	1.2
971	IT	Gulf of Naples	37.1.3	Tyrrhenian	40.69191	14.17448	2	Actinopterygii	Perciformes	Scombridae	Scomber scombrus	Atlantic mackerel	Scosco	oceanic mesopelagic	3.73	FB	NA	NA	NA	NA	NA	FI	BaP	HMW	Pyrolitic	WW	0.0001	0.00007	<LOQ	0.00005	<LOQ	<LOQ	NA	July 2004	01/07/2004	Summer	W	Perugini et al., 2007	2007	2004	10	NA	3.71604E-05	NA	NA	3.23296E-08	0.014849315	0.0003	2.9
972	IT	Gulf of Naples	37.1.3	Tyrrhenian	40.69191	14.17448	2	Actinopterygii	Perciformes	Scombridae	Scomber scombrus	Atlantic mackerel	Scosco	oceanic mesopelagic	3.73	FB	NA	NA	NA	NA	NA	FI	BbF	HMW	Pyrolitic	WW	0.00006	0.00005	0.00578	0.00578	0.00154	0.01339	NA	July 2004	01/07/2004	Summer	W	Perugini et al., 2007	2007	2004	10	NA	NA	NA	NA	1.54647E-06	0.014849315	NA	1.2
973	IT	Gulf of Naples	37.1.3	Tyrrhenian	40.69191	14.17448	2	Actinopterygii	Perciformes	Scombridae	Scomber scombrus	Atlantic mackerel	Scosco	oceanic mesopelagic	3.73	FB	NA	NA	NA	NA	NA	FI	BghiP	HMW	Pyrolitic	WW	0.00024	0.00016	<LOQ	0.00012	<LOQ	<LOQ	NA	July 2004	01/07/2004	Summer	W	Perugini et al., 2007	2007	2004	10	NA	NA	NA	NA	NA	0.014849315	NA	NA
974	IT	Gulf of Naples	37.1.3	Tyrrhenian	40.69191	14.17448	2	Actinopterygii	Perciformes	Scombridae	Scomber scombrus	Atlantic mackerel	Scosco	oceanic mesopelagic	3.73	FB	NA	NA	NA	NA	NA	FI	BkF	HMW	Pyrolitic	WW	0.00002	0.00001	0.00076	0.00076	<LOQ	0.00126	NA	July 2004	01/07/2004	Summer	W	Perugini et al., 2007	2007	2004	10	NA	NA	NA	NA	2.03342E-07	0.014849315	NA	1.2
975	IT	Gulf of Naples	37.1.3	Tyrrhenian	40.69191	14.17448	2	Actinopterygii	Perciformes	Scombridae	Scomber scombrus	Atlantic mackerel	Scosco	oceanic mesopelagic	3.73	FB	NA	NA	NA	NA	NA	FI	Chr	HMW	Pyrolitic	WW	0.00018	0.00016	0.00037	0.00037	<LOQ	0.00054	NA	July 2004	01/07/2004	Summer	W	Perugini et al., 2007	2007	2004	10	NA	NA	NA	NA	3.64184E-08	0.014849315	NA	0.441455329
976	IT	Gulf of Naples	37.1.3	Tyrrhenian	40.69191	14.17448	2	Actinopterygii	Perciformes	Scombridae	Scomber scombrus	Atlantic mackerel	Scosco	oceanic mesopelagic	3.73	FB	NA	NA	NA	NA	NA	FI	DahA	HMW	Pyrolitic	WW	0.00008	0.00006	<LOQ	0.00004	<LOQ	<LOQ	NA	July 2004	01/07/2004	Summer	W	Perugini et al., 2007	2007	2004	10	NA	NA	NA	NA	3.65659E-08	0.014849315	NA	4.1
977	IT	Gulf of Naples	37.1.3	Tyrrhenian	40.69191	14.17448	2	Actinopterygii	Perciformes	Scombridae	Scomber scombrus	Atlantic mackerel	Scosco	oceanic mesopelagic	3.73	FB	NA	NA	NA	NA	NA	FI	Flu	MMW	Pyrolitic	WW	0.00021	0.00017	0.00095	0.00095	<LOQ	0.00257	NA	July 2004	01/07/2004	Summer	W	Perugini et al., 2007	2007	2004	10	5.29536E-06	5.29536E-06	NA	1.43254E-05	NA	0.014849315	0.04	NA
978	IT	Gulf of Naples	37.1.3	Tyrrhenian	40.69191	14.17448	2	Actinopterygii	Perciformes	Scombridae	Scomber scombrus	Atlantic mackerel	Scosco	oceanic mesopelagic	3.73	FB	NA	NA	NA	NA	NA	FI	InP	HMW	Pyrolitic	WW	0.00026	0.00021	<LOQ	0.00013	<LOQ	<LOQ	NA	July 2004	01/07/2004	Summer	W	Perugini et al., 2007	2007	2004	10	NA	NA	NA	NA	3.47822E-08	0.014849315	NA	1.2
979	IT	Gulf of Naples	37.1.3	Tyrrhenian	40.69191	14.17448	2	Actinopterygii	Perciformes	Scombridae	Scomber scombrus	Atlantic mackerel	Scosco	oceanic mesopelagic	3.73	FB	NA	NA	NA	NA	NA	FI	Pyr	MMW	Pyrolitic	WW	0.00062	0.00049	0.00314	0.00314	0.00131	0.00536	NA	July 2004	01/07/2004	Summer	W	Perugini et al., 2007	2007	2004	10	2.33368E-05	2.33368E-05	9.73604E-06	3.9836E-05	NA	0.014849315	0.03	NA
980	IT	Gulf of Naples	37.1.3	Tyrrhenian	40.69191	14.17448	2	Actinopterygii	Gadiformes	Merlucciidae	Merluccius merluccius	European hake	Mermer	neritic epipelagic demersal	4.43	FB	NA	NA	NA	NA	NA	FI	Ant	LMW	Petrogenic	WW	0.00015	0.00013	0.00012	0.00012	<LOQ	0.00024	NA	July 2004	01/07/2004	Summer	W	Perugini et al., 2007	2007	2004	10	1.27854E-07	1.27854E-07	NA	2.55708E-07	NA	0.021287671	0.3	NA
981	IT	Gulf of Naples	37.1.3	Tyrrhenian	40.69191	14.17448	2	Actinopterygii	Gadiformes	Merlucciidae	Merluccius merluccius	European hake	Mermer	neritic epipelagic demersal	4.43	FB	NA	NA	NA	NA	NA	FI	BaA	HMW	Pyrolitic	WW	0.00015	0.00012	0.00312	0.00312	0.00161	0.00408	NA	July 2004	01/07/2004	Summer	W	Perugini et al., 2007	2007	2004	10	NA	NA	NA	NA	1.19671E-06	0.021287671	NA	1.2
982	IT	Gulf of Naples	37.1.3	Tyrrhenian	40.69191	14.17448	2	Actinopterygii	Gadiformes	Merlucciidae	Merluccius merluccius	European hake	Mermer	neritic epipelagic demersal	4.43	FB	NA	NA	NA	NA	NA	FI	BaP	HMW	Pyrolitic	WW	0.0001	0.00007	<LOQ	0.00005	<LOQ	0	NA	July 2004	01/07/2004	Summer	W	Perugini et al., 2007	2007	2004	10	NA	5.32725E-05	NA	0	4.6347E-08	0.021287671	0.0003	2.9
983	IT	Gulf of Naples	37.1.3	Tyrrhenian	40.69191	14.17448	2	Actinopterygii	Gadiformes	Merlucciidae	Merluccius merluccius	European hake	Mermer	neritic epipelagic demersal	4.43	FB	NA	NA	NA	NA	NA	FI	BbF	HMW	Pyrolitic	WW	0.00006	0.00005	<LOQ	0.00003	<LOQ	0	NA	July 2004	01/07/2004	Summer	W	Perugini et al., 2007	2007	2004	10	NA	NA	NA	NA	1.15068E-08	0.021287671	NA	1.2
984	IT	Gulf of Naples	37.1.3	Tyrrhenian	40.69191	14.17448	2	Actinopterygii	Gadiformes	Merlucciidae	Merluccius merluccius	European hake	Mermer	neritic epipelagic demersal	4.43	FB	NA	NA	NA	NA	NA	FI	BghiP	HMW	Pyrolitic	WW	0.00024	0.00016	<LOQ	0.00012	<LOQ	0	NA	July 2004	01/07/2004	Summer	W	Perugini et al., 2007	2007	2004	10	NA	NA	NA	NA	NA	0.021287671	NA	NA
985	IT	Gulf of Naples	37.1.3	Tyrrhenian	40.69191	14.17448	2	Actinopterygii	Gadiformes	Merlucciidae	Merluccius merluccius	European hake	Mermer	neritic epipelagic demersal	4.43	FB	NA	NA	NA	NA	NA	FI	BkF	HMW	Pyrolitic	WW	0.00002	0.00001	0.00165	0.00165	0.00136	0.00215	NA	July 2004	01/07/2004	Summer	W	Perugini et al., 2007	2007	2004	10	NA	NA	NA	NA	6.32877E-07	0.021287671	NA	1.2
986	IT	Gulf of Naples	37.1.3	Tyrrhenian	40.69191	14.17448	2	Actinopterygii	Gadiformes	Merlucciidae	Merluccius merluccius	European hake	Mermer	neritic epipelagic demersal	4.43	FB	NA	NA	NA	NA	NA	FI	Chr	HMW	Pyrolitic	WW	0.00018	0.00016	0.00056	0.00056	0.00028	0.00091	NA	July 2004	01/07/2004	Summer	W	Perugini et al., 2007	2007	2004	10	NA	NA	NA	NA	7.90185E-08	0.021287671	NA	0.441455329
987	IT	Gulf of Naples	37.1.3	Tyrrhenian	40.69191	14.17448	2	Actinopterygii	Gadiformes	Merlucciidae	Merluccius merluccius	European hake	Mermer	neritic epipelagic demersal	4.43	FB	NA	NA	NA	NA	NA	FI	DahA	HMW	Pyrolitic	WW	0.00008	0.00006	<LOQ	0.00004	<LOQ	0	NA	July 2004	01/07/2004	Summer	W	Perugini et al., 2007	2007	2004	10	NA	NA	NA	NA	5.24201E-08	0.021287671	NA	4.1
988	IT	Gulf of Naples	37.1.3	Tyrrhenian	40.69191	14.17448	2	Actinopterygii	Gadiformes	Merlucciidae	Merluccius merluccius	European hake	Mermer	neritic epipelagic demersal	4.43	FB	NA	NA	NA	NA	NA	FI	Flu	MMW	Pyrolitic	WW	0.00021	0.00017	<LOQ	0.000105	<LOQ	0	NA	July 2004	01/07/2004	Summer	W	Perugini et al., 2007	2007	2004	10	NA	8.39041E-07	NA	0	NA	0.021287671	0.04	NA
989	IT	Gulf of Naples	37.1.3	Tyrrhenian	40.69191	14.17448	2	Actinopterygii	Gadiformes	Merlucciidae	Merluccius merluccius	European hake	Mermer	neritic epipelagic demersal	4.43	FB	NA	NA	NA	NA	NA	FI	InP	HMW	Pyrolitic	WW	0.00026	0.00021	<LOQ	0.00013	<LOQ	0	NA	July 2004	01/07/2004	Summer	W	Perugini et al., 2007	2007	2004	10	NA	NA	NA	NA	4.9863E-08	0.021287671	NA	1.2
990	IT	Gulf of Naples	37.1.3	Tyrrhenian	40.69191	14.17448	2	Actinopterygii	Gadiformes	Merlucciidae	Merluccius merluccius	European hake	Mermer	neritic epipelagic demersal	4.43	FB	NA	NA	NA	NA	NA	FI	Pyr	MMW	Pyrolitic	WW	0.00062	0.00049	<LOQ	0.00031	<LOQ	0	NA	July 2004	01/07/2004	Summer	W	Perugini et al., 2007	2007	2004	10	NA	3.30289E-06	NA	0	NA	0.021287671	0.03	NA
991	IT	Gulf of Naples	37.1.3	Tyrrhenian	40.69191	14.17448	2	Actinopterygii	Perciformes	Mullidae	Mullus barbatus	Red mullet	Mulbar	neritic mesopelagic demersal	3.24	FB	NA	NA	NA	NA	NA	FI	Ant	LMW	Petrogenic	WW	0.00015	0.00013	0.00391	0.00391	0.00242	0.00623	NA	July 2004	01/07/2004	Summer	W	Perugini et al., 2007	2007	2004	10	4.16591E-06	4.16591E-06	2.57839E-06	6.63775E-06	NA	0.021287671	0.3	NA
992	IT	Gulf of Naples	37.1.3	Tyrrhenian	40.69191	14.17448	2	Actinopterygii	Perciformes	Mullidae	Mullus barbatus	Red mullet	Mulbar	neritic mesopelagic demersal	3.24	FB	NA	NA	NA	NA	NA	FI	BaA	HMW	Pyrolitic	WW	0.00015	0.00012	0.0031	0.0031	0.00171	0.00431	NA	July 2004	01/07/2004	Summer	W	Perugini et al., 2007	2007	2004	10	NA	NA	NA	NA	1.18904E-06	0.021287671	NA	1.2
993	IT	Gulf of Naples	37.1.3	Tyrrhenian	40.69191	14.17448	2	Actinopterygii	Perciformes	Mullidae	Mullus barbatus	Red mullet	Mulbar	neritic mesopelagic demersal	3.24	FB	NA	NA	NA	NA	NA	FI	BaP	HMW	Pyrolitic	WW	0.0001	0.00007	<LOQ	0.00005	<LOQ	<LOQ	NA	July 2004	01/07/2004	Summer	W	Perugini et al., 2007	2007	2004	10	NA	5.32725E-05	NA	NA	4.6347E-08	0.021287671	0.0003	2.9
994	IT	Gulf of Naples	37.1.3	Tyrrhenian	40.69191	14.17448	2	Actinopterygii	Perciformes	Mullidae	Mullus barbatus	Red mullet	Mulbar	neritic mesopelagic demersal	3.24	FB	NA	NA	NA	NA	NA	FI	BbF	HMW	Pyrolitic	WW	0.00006	0.00005	0.0047	0.0047	0.00204	0.00651	NA	July 2004	01/07/2004	Summer	W	Perugini et al., 2007	2007	2004	10	NA	NA	NA	NA	1.80274E-06	0.021287671	NA	1.2
995	IT	Gulf of Naples	37.1.3	Tyrrhenian	40.69191	14.17448	2	Actinopterygii	Perciformes	Mullidae	Mullus barbatus	Red mullet	Mulbar	neritic mesopelagic demersal	3.24	FB	NA	NA	NA	NA	NA	FI	BghiP	HMW	Pyrolitic	WW	0.00024	0.00016	<LOQ	0.00012	<LOQ	<LOQ	NA	July 2004	01/07/2004	Summer	W	Perugini et al., 2007	2007	2004	10	NA	NA	NA	NA	NA	0.021287671	NA	NA
996	IT	Gulf of Naples	37.1.3	Tyrrhenian	40.69191	14.17448	2	Actinopterygii	Perciformes	Mullidae	Mullus barbatus	Red mullet	Mulbar	neritic mesopelagic demersal	3.24	FB	NA	NA	NA	NA	NA	FI	BkF	HMW	Pyrolitic	WW	0.00002	0.00001	0.00079	0.00079	<LOQ	0.00148	NA	July 2004	01/07/2004	Summer	W	Perugini et al., 2007	2007	2004	10	NA	NA	NA	NA	3.03014E-07	0.021287671	NA	1.2
997	IT	Gulf of Naples	37.1.3	Tyrrhenian	40.69191	14.17448	2	Actinopterygii	Perciformes	Mullidae	Mullus barbatus	Red mullet	Mulbar	neritic mesopelagic demersal	3.24	FB	NA	NA	NA	NA	NA	FI	Chr	HMW	Pyrolitic	WW	0.00018	0.00016	<LOQ	0.00009	<LOQ	<LOQ	NA	July 2004	01/07/2004	Summer	W	Perugini et al., 2007	2007	2004	10	NA	NA	NA	NA	1.26994E-08	0.021287671	NA	0.441455329
998	IT	Gulf of Naples	37.1.3	Tyrrhenian	40.69191	14.17448	2	Actinopterygii	Perciformes	Mullidae	Mullus barbatus	Red mullet	Mulbar	neritic mesopelagic demersal	3.24	FB	NA	NA	NA	NA	NA	FI	DahA	HMW	Pyrolitic	WW	0.00008	0.00006	<LOQ	0.00004	<LOQ	<LOQ	NA	July 2004	01/07/2004	Summer	W	Perugini et al., 2007	2007	2004	10	NA	NA	NA	NA	5.24201E-08	0.021287671	NA	4.1
999	IT	Gulf of Naples	37.1.3	Tyrrhenian	40.69191	14.17448	2	Actinopterygii	Perciformes	Mullidae	Mullus barbatus	Red mullet	Mulbar	neritic mesopelagic demersal	3.24	FB	NA	NA	NA	NA	NA	FI	Flu	MMW	Pyrolitic	WW	0.00021	0.00017	0.0006	0.0006	0.00023	0.0013	NA	July 2004	01/07/2004	Summer	W	Perugini et al., 2007	2007	2004	10	4.79452E-06	4.79452E-06	1.8379E-06	1.03881E-05	NA	0.021287671	0.04	NA
1000	IT	Gulf of Naples	37.1.3	Tyrrhenian	40.69191	14.17448	2	Actinopterygii	Perciformes	Mullidae	Mullus barbatus	Red mullet	Mulbar	neritic mesopelagic demersal	3.24	FB	NA	NA	NA	NA	NA	FI	InP	HMW	Pyrolitic	WW	0.00026	0.00021	<LOQ	0.00013	<LOQ	<LOQ	NA	July 2004	01/07/2004	Summer	W	Perugini et al., 2007	2007	2004	10	NA	NA	NA	NA	4.9863E-08	0.021287671	NA	1.2
1001	IT	Gulf of Naples	37.1.3	Tyrrhenian	40.69191	14.17448	2	Actinopterygii	Perciformes	Mullidae	Mullus barbatus	Red mullet	Mulbar	neritic mesopelagic demersal	3.24	FB	NA	NA	NA	NA	NA	FI	Pyr	MMW	Pyrolitic	WW	0.00062	0.00049	0.00476	0.00476	0.00285	0.00752	NA	July 2004	01/07/2004	Summer	W	Perugini et al., 2007	2007	2004	10	5.07154E-05	5.07154E-05	3.03653E-05	8.01218E-05	NA	0.021287671	0.03	NA
1002	IT	Gulf of Naples	37.1.3	Tyrrhenian	40.69191	14.17448	2	Malacostraca	Decapoda	Aristeidae	Aristeus antennatus	Blue and red shrimp	Ariant	oceanic bathypelagic demersal	3.30	SLB	NA	NA	NA	NA	NA	SO	Ant	LMW	Petrogenic	WW	0.00015	0.00013	0.00235	0.00235	0.00173	0.00299	NA	December 2004	01/12/2004	Autumn	W	Perugini et al., 2007	2007	2004	10	7.2504E-07	7.2504E-07	5.33753E-07	9.22498E-07	NA	0.006164384	0.3	NA
1003	IT	Gulf of Naples	37.1.3	Tyrrhenian	40.69191	14.17448	2	Malacostraca	Decapoda	Aristeidae	Aristeus antennatus	Blue and red shrimp	Ariant	oceanic bathypelagic demersal	3.30	SLB	NA	NA	NA	NA	NA	SO	BaA	HMW	Pyrolitic	WW	0.00015	0.00012	0.00353	0.00353	0.00263	0.00493	NA	December 2004	01/12/2004	Autumn	W	Perugini et al., 2007	2007	2004	10	NA	NA	NA	NA	3.92077E-07	0.006164384	NA	1.2
1004	IT	Gulf of Naples	37.1.3	Tyrrhenian	40.69191	14.17448	2	Malacostraca	Decapoda	Aristeidae	Aristeus antennatus	Blue and red shrimp	Ariant	oceanic bathypelagic demersal	3.30	SLB	NA	NA	NA	NA	NA	SO	BaP	HMW	Pyrolitic	WW	0.0001	0.00007	<LOQ	0.00005	<LOQ	<LOQ	NA	December 2004	01/12/2004	Autumn	W	Perugini et al., 2007	2007	2004	10	NA	1.54264E-05	NA	NA	1.3421E-08	0.006164384	0.0003	2.9
1005	IT	Gulf of Naples	37.1.3	Tyrrhenian	40.69191	14.17448	2	Malacostraca	Decapoda	Aristeidae	Aristeus antennatus	Blue and red shrimp	Ariant	oceanic bathypelagic demersal	3.30	SLB	NA	NA	NA	NA	NA	SO	BbF	HMW	Pyrolitic	WW	0.00006	0.00005	<LOQ	0.00003	<LOQ	<LOQ	NA	December 2004	01/12/2004	Autumn	W	Perugini et al., 2007	2007	2004	10	NA	NA	NA	NA	3.3321E-09	0.006164384	NA	1.2
1006	IT	Gulf of Naples	37.1.3	Tyrrhenian	40.69191	14.17448	2	Malacostraca	Decapoda	Aristeidae	Aristeus antennatus	Blue and red shrimp	Ariant	oceanic bathypelagic demersal	3.30	SLB	NA	NA	NA	NA	NA	SO	BghiP	HMW	Pyrolitic	WW	0.00024	0.00016	<LOQ	0.00012	<LOQ	<LOQ	NA	December 2004	01/12/2004	Autumn	W	Perugini et al., 2007	2007	2004	10	NA	NA	NA	NA	NA	0.006164384	NA	NA
1007	IT	Gulf of Naples	37.1.3	Tyrrhenian	40.69191	14.17448	2	Malacostraca	Decapoda	Aristeidae	Aristeus antennatus	Blue and red shrimp	Ariant	oceanic bathypelagic demersal	3.30	SLB	NA	NA	NA	NA	NA	SO	BkF	HMW	Pyrolitic	WW	0.00002	0.00001	0.00121	0.00121	0.00011	0.00269	NA	December 2004	01/12/2004	Autumn	W	Perugini et al., 2007	2007	2004	10	NA	NA	NA	NA	1.34395E-07	0.006164384	NA	1.2
1008	IT	Gulf of Naples	37.1.3	Tyrrhenian	40.69191	14.17448	2	Malacostraca	Decapoda	Aristeidae	Aristeus antennatus	Blue and red shrimp	Ariant	oceanic bathypelagic demersal	3.30	SLB	NA	NA	NA	NA	NA	SO	Chr	HMW	Pyrolitic	WW	0.00018	0.00016	0.00061	0.00061	0.00019	0.00125	NA	December 2004	01/12/2004	Autumn	W	Perugini et al., 2007	2007	2004	10	NA	NA	NA	NA	2.49248E-08	0.006164384	NA	0.441455329
1009	IT	Gulf of Naples	37.1.3	Tyrrhenian	40.69191	14.17448	2	Malacostraca	Decapoda	Aristeidae	Aristeus antennatus	Blue and red shrimp	Ariant	oceanic bathypelagic demersal	3.30	SLB	NA	NA	NA	NA	NA	SO	DahA	HMW	Pyrolitic	WW	0.00008	0.00006	<LOQ	0.00004	<LOQ	<LOQ	NA	December 2004	01/12/2004	Autumn	W	Perugini et al., 2007	2007	2004	10	NA	NA	NA	NA	1.51796E-08	0.006164384	NA	4.1
1010	IT	Gulf of Naples	37.1.3	Tyrrhenian	40.69191	14.17448	2	Malacostraca	Decapoda	Aristeidae	Aristeus antennatus	Blue and red shrimp	Ariant	oceanic bathypelagic demersal	3.30	SLB	NA	NA	NA	NA	NA	SO	Flu	MMW	Pyrolitic	WW	0.00021	0.00017	0.00074	0.00074	<LOQ	0.00118	NA	December 2004	01/12/2004	Autumn	W	Perugini et al., 2007	2007	2004	10	1.71233E-06	1.71233E-06	NA	2.73047E-06	NA	0.006164384	0.04	NA
1011	IT	Gulf of Naples	37.1.3	Tyrrhenian	40.69191	14.17448	2	Malacostraca	Decapoda	Aristeidae	Aristeus antennatus	Blue and red shrimp	Ariant	oceanic bathypelagic demersal	3.30	SLB	NA	NA	NA	NA	NA	SO	InP	HMW	Pyrolitic	WW	0.00026	0.00021	<LOQ	0.00013	<LOQ	<LOQ	NA	December 2004	01/12/2004	Autumn	W	Perugini et al., 2007	2007	2004	10	NA	NA	NA	NA	1.44391E-08	0.006164384	NA	1.2
1012	IT	Gulf of Naples	37.1.3	Tyrrhenian	40.69191	14.17448	2	Malacostraca	Decapoda	Aristeidae	Aristeus antennatus	Blue and red shrimp	Ariant	oceanic bathypelagic demersal	3.30	SLB	NA	NA	NA	NA	NA	SO	Pyr	MMW	Pyrolitic	WW	0.00062	0.00049	0.00221	0.00221	0.00132	0.00363	NA	December 2004	01/12/2004	Autumn	W	Perugini et al., 2007	2007	2004	10	6.81846E-06	6.81846E-06	4.07257E-06	1.11996E-05	NA	0.006164384	0.03	NA
1013	IT	Gulf of Naples	37.1.3	Tyrrhenian	40.69191	14.17448	2	Cephalopoda	Oegopsida	Ommastrephidae	Todarodes sagittatus	European flying squid	Todsag	oceanic bathypelagic benthic	4.40	SLB	NA	NA	NA	NA	NA	SO	Ant	LMW	Petrogenic	WW	0.00015	0.00013	0.00366	0.00366	0.00277	0.00494	NA	December 2004	01/12/2004	Autumn	W	Perugini et al., 2007	2007	2004	10	2.04764E-06	2.04764E-06	1.54971E-06	2.76375E-06	NA	0.011178082	0.3	NA
1014	IT	Gulf of Naples	37.1.3	Tyrrhenian	40.69191	14.17448	2	Cephalopoda	Oegopsida	Ommastrephidae	Todarodes sagittatus	European flying squid	Todsag	oceanic bathypelagic benthic	4.40	SLB	NA	NA	NA	NA	NA	SO	BaA	HMW	Pyrolitic	WW	0.00015	0.00012	0.00956	0.00956	0.00301	0.01819	NA	December 2004	01/12/2004	Autumn	W	Perugini et al., 2007	2007	2004	10	NA	NA	NA	NA	1.92545E-06	0.011178082	NA	1.2
1015	IT	Gulf of Naples	37.1.3	Tyrrhenian	40.69191	14.17448	2	Cephalopoda	Oegopsida	Ommastrephidae	Todarodes sagittatus	European flying squid	Todsag	oceanic bathypelagic benthic	4.40	SLB	NA	NA	NA	NA	NA	SO	BaP	HMW	Pyrolitic	WW	0.0001	0.00007	<LOQ	0.00005	<LOQ	<LOQ	NA	December 2004	01/12/2004	Autumn	W	Perugini et al., 2007	2007	2004	10	NA	2.79732E-05	NA	NA	2.43367E-08	0.011178082	0.0003	2.9
1016	IT	Gulf of Naples	37.1.3	Tyrrhenian	40.69191	14.17448	2	Cephalopoda	Oegopsida	Ommastrephidae	Todarodes sagittatus	European flying squid	Todsag	oceanic bathypelagic benthic	4.40	SLB	NA	NA	NA	NA	NA	SO	BbF	HMW	Pyrolitic	WW	0.00006	0.00005	0.00177	0.00177	0.00059	0.0027	NA	December 2004	01/12/2004	Autumn	W	Perugini et al., 2007	2007	2004	10	NA	NA	NA	NA	3.5649E-07	0.011178082	NA	1.2
1017	IT	Gulf of Naples	37.1.3	Tyrrhenian	40.69191	14.17448	2	Cephalopoda	Oegopsida	Ommastrephidae	Todarodes sagittatus	European flying squid	Todsag	oceanic bathypelagic benthic	4.40	SLB	NA	NA	NA	NA	NA	SO	BghiP	HMW	Pyrolitic	WW	0.00024	0.00016	<LOQ	0.00012	<LOQ	<LOQ	NA	December 2004	01/12/2004	Autumn	W	Perugini et al., 2007	2007	2004	10	NA	NA	NA	NA	NA	0.011178082	NA	NA
1018	IT	Gulf of Naples	37.1.3	Tyrrhenian	40.69191	14.17448	2	Cephalopoda	Oegopsida	Ommastrephidae	Todarodes sagittatus	European flying squid	Todsag	oceanic bathypelagic benthic	4.40	SLB	NA	NA	NA	NA	NA	SO	BkF	HMW	Pyrolitic	WW	0.00002	0.00001	0.00268	0.00268	0.00237	0.0036	NA	December 2004	01/12/2004	Autumn	W	Perugini et al., 2007	2007	2004	10	NA	NA	NA	NA	5.3977E-07	0.011178082	NA	1.2
1019	IT	Gulf of Naples	37.1.3	Tyrrhenian	40.69191	14.17448	2	Cephalopoda	Oegopsida	Ommastrephidae	Todarodes sagittatus	European flying squid	Todsag	oceanic bathypelagic benthic	4.40	SLB	NA	NA	NA	NA	NA	SO	Chr	HMW	Pyrolitic	WW	0.00018	0.00016	0.04601	0.04601	0.02033	0.08812	NA	December 2004	01/12/2004	Autumn	W	Perugini et al., 2007	2007	2004	10	NA	NA	NA	NA	3.40904E-06	0.011178082	NA	0.441455329
1020	IT	Gulf of Naples	37.1.3	Tyrrhenian	40.69191	14.17448	2	Cephalopoda	Oegopsida	Ommastrephidae	Todarodes sagittatus	European flying squid	Todsag	oceanic bathypelagic benthic	4.40	SLB	NA	NA	NA	NA	NA	SO	DahA	HMW	Pyrolitic	WW	0.00008	0.00006	<LOQ	0.00004	<LOQ	<LOQ	NA	December 2004	01/12/2004	Autumn	W	Perugini et al., 2007	2007	2004	10	NA	NA	NA	NA	2.75256E-08	0.011178082	NA	4.1
1021	IT	Gulf of Naples	37.1.3	Tyrrhenian	40.69191	14.17448	2	Cephalopoda	Oegopsida	Ommastrephidae	Todarodes sagittatus	European flying squid	Todsag	oceanic bathypelagic benthic	4.40	SLB	NA	NA	NA	NA	NA	SO	Flu	MMW	Pyrolitic	WW	0.00021	0.00017	0.00189	0.00189	0.0013	0.00247	NA	December 2004	01/12/2004	Autumn	W	Perugini et al., 2007	2007	2004	10	7.9304E-06	7.9304E-06	5.45477E-06	1.03641E-05	NA	0.011178082	0.04	NA
1022	IT	Gulf of Naples	37.1.3	Tyrrhenian	40.69191	14.17448	2	Cephalopoda	Oegopsida	Ommastrephidae	Todarodes sagittatus	European flying squid	Todsag	oceanic bathypelagic benthic	4.40	SLB	NA	NA	NA	NA	NA	SO	InP	HMW	Pyrolitic	WW	0.00026	0.00021	<LOQ	0.00013	<LOQ	<LOQ	NA	December 2004	01/12/2004	Autumn	W	Perugini et al., 2007	2007	2004	10	NA	NA	NA	NA	2.61829E-08	0.011178082	NA	1.2
1023	IT	Gulf of Naples	37.1.3	Tyrrhenian	40.69191	14.17448	2	Cephalopoda	Oegopsida	Ommastrephidae	Todarodes sagittatus	European flying squid	Todsag	oceanic bathypelagic benthic	4.40	SLB	NA	NA	NA	NA	NA	SO	Pyr	MMW	Pyrolitic	WW	0.00062	0.00049	0.00565	0.00565	0.00454	0.00796	NA	December 2004	01/12/2004	Autumn	W	Perugini et al., 2007	2007	2004	10	3.16097E-05	3.16097E-05	2.53996E-05	4.45333E-05	NA	0.011178082	0.03	NA
1024	IT	Gulf of Naples	37.1.3	Tyrrhenian	40.69191	14.17448	2	Bivalvia	Mytiloida	Mytilidae	Mytilus galloprovincialis	Mediterranean mussel	Mytgal	neritic epipelagic benthic	2.69	SLB	NA	NA	NA	NA	NA	SO	Ant	LMW	Petrogenic	WW	0.00015	0.00013	0.01363	0.01363	0.01197	0.01634	NA	December 2004	01/12/2004	Autumn	W	Perugini et al., 2007	2007	2004	10	1.00178E-05	1.00178E-05	8.79773E-06	1.20096E-05	NA	0.014684932	0.3	NA
1025	IT	Gulf of Naples	37.1.3	Tyrrhenian	40.69191	14.17448	2	Bivalvia	Mytiloida	Mytilidae	Mytilus galloprovincialis	Mediterranean mussel	Mytgal	neritic epipelagic benthic	2.69	SLB	NA	NA	NA	NA	NA	SO	BaA	HMW	Pyrolitic	WW	0.00015	0.00012	0.00605	0.00605	0.00473	0.00738	NA	December 2004	01/12/2004	Autumn	W	Perugini et al., 2007	2007	2004	10	NA	NA	NA	NA	1.60079E-06	0.014684932	NA	1.2
1026	IT	Gulf of Naples	37.1.3	Tyrrhenian	40.69191	14.17448	2	Bivalvia	Mytiloida	Mytilidae	Mytilus galloprovincialis	Mediterranean mussel	Mytgal	neritic epipelagic benthic	2.69	SLB	NA	NA	NA	NA	NA	SO	BaP	HMW	Pyrolitic	WW	0.0001	0.00007	0.01162	0.01162	0.00842	0.01351	NA	December 2004	01/12/2004	Autumn	W	Perugini et al., 2007	2007	2004	10	0.008540486	0.008540486	0.006188545	0.009929601	7.43022E-06	0.014684932	0.0003	2.9
1027	IT	Gulf of Naples	37.1.3	Tyrrhenian	40.69191	14.17448	2	Bivalvia	Mytiloida	Mytilidae	Mytilus galloprovincialis	Mediterranean mussel	Mytgal	neritic epipelagic benthic	2.69	SLB	NA	NA	NA	NA	NA	SO	BbF	HMW	Pyrolitic	WW	0.00006	0.00005	0.0191	0.0191	0.0157	0.02274	NA	December 2004	01/12/2004	Autumn	W	Perugini et al., 2007	2007	2004	10	NA	NA	NA	NA	5.05373E-06	0.014684932	NA	1.2
1028	IT	Gulf of Naples	37.1.3	Tyrrhenian	40.69191	14.17448	2	Bivalvia	Mytiloida	Mytilidae	Mytilus galloprovincialis	Mediterranean mussel	Mytgal	neritic epipelagic benthic	2.69	SLB	NA	NA	NA	NA	NA	SO	BghiP	HMW	Pyrolitic	WW	0.00024	0.00016	0.01093	0.01093	0.00961	0.01606	NA	December 2004	01/12/2004	Autumn	W	Perugini et al., 2007	2007	2004	10	NA	NA	NA	NA	NA	0.014684932	NA	NA
1029	IT	Gulf of Naples	37.1.3	Tyrrhenian	40.69191	14.17448	2	Bivalvia	Mytiloida	Mytilidae	Mytilus galloprovincialis	Mediterranean mussel	Mytgal	neritic epipelagic benthic	2.69	SLB	NA	NA	NA	NA	NA	SO	BkF	HMW	Pyrolitic	WW	0.00002	0.00001	0.00582	0.00582	0.00502	0.00723	NA	December 2004	01/12/2004	Autumn	W	Perugini et al., 2007	2007	2004	10	NA	NA	NA	NA	1.53993E-06	0.014684932	NA	1.2
1030	IT	Gulf of Naples	37.1.3	Tyrrhenian	40.69191	14.17448	2	Bivalvia	Mytiloida	Mytilidae	Mytilus galloprovincialis	Mediterranean mussel	Mytgal	neritic epipelagic benthic	2.69	SLB	NA	NA	NA	NA	NA	SO	Chr	HMW	Pyrolitic	WW	0.00018	0.00016	0.01654	0.01654	0.01204	0.02023	NA	December 2004	01/12/2004	Autumn	W	Perugini et al., 2007	2007	2004	10	NA	NA	NA	NA	1.60998E-06	0.014684932	NA	0.441455329
1031	IT	Gulf of Naples	37.1.3	Tyrrhenian	40.69191	14.17448	2	Bivalvia	Mytiloida	Mytilidae	Mytilus galloprovincialis	Mediterranean mussel	Mytgal	neritic epipelagic benthic	2.69	SLB	NA	NA	NA	NA	NA	SO	DahA	HMW	Pyrolitic	WW	0.00008	0.00006	0.00118	0.00118	0.00063	0.00144	NA	December 2004	01/12/2004	Autumn	W	Perugini et al., 2007	2007	2004	10	NA	NA	NA	NA	1.06675E-06	0.014684932	NA	4.1
1032	IT	Gulf of Naples	37.1.3	Tyrrhenian	40.69191	14.17448	2	Bivalvia	Mytiloida	Mytilidae	Mytilus galloprovincialis	Mediterranean mussel	Mytgal	neritic epipelagic benthic	2.69	SLB	NA	NA	NA	NA	NA	SO	Flu	MMW	Pyrolitic	WW	0.00021	0.00017	0.04057	0.04057	0.03398	0.0491	NA	December 2004	01/12/2004	Autumn	W	Perugini et al., 2007	2007	2004	10	0.000223637	0.000223637	0.00018731	0.000270657	NA	0.014684932	0.04	NA
1033	IT	Gulf of Naples	37.1.3	Tyrrhenian	40.69191	14.17448	2	Bivalvia	Mytiloida	Mytilidae	Mytilus galloprovincialis	Mediterranean mussel	Mytgal	neritic epipelagic benthic	2.69	SLB	NA	NA	NA	NA	NA	SO	InP	HMW	Pyrolitic	WW	0.00026	0.00021	0.00918	0.00918	0.00699	0.01095	NA	December 2004	01/12/2004	Autumn	W	Perugini et al., 2007	2007	2004	10	NA	NA	NA	NA	2.42897E-06	0.014684932	NA	1.2
1034	IT	Gulf of Naples	37.1.3	Tyrrhenian	40.69191	14.17448	2	Bivalvia	Mytiloida	Mytilidae	Mytilus galloprovincialis	Mediterranean mussel	Mytgal	neritic epipelagic benthic	2.69	SLB	NA	NA	NA	NA	NA	SO	Pyr	MMW	Pyrolitic	WW	0.00062	0.00049	0.04047	0.04047	0.034	0.04735	NA	December 2004	01/12/2004	Autumn	W	Perugini et al., 2007	2007	2004	10	0.000297447	0.000297447	0.000249894	0.000348014	NA	0.014684932	0.03	NA
1035	IT	Gulf of Naples	37.1.3	Tyrrhenian	40.69191	14.17448	2	Actinopterygii	Gadiformes	Gadidae	Micromesistius poutassou	Blue whiting	Micpou	oceanic bathypelagic	3.70	FB	NA	NA	NA	NA	NA	FI	Ant	LMW	Petrogenic	WW	0.00015	0.00013	0.0055	0.0055	0.00353	0.00695	NA	December 2004	01/12/2004	Autumn	W	Perugini et al., 2007	2007	2004	10	4.08765E-06	4.08765E-06	2.62353E-06	5.1653E-06	NA	0.014849315	0.3	NA
1036	IT	Gulf of Naples	37.1.3	Tyrrhenian	40.69191	14.17448	2	Actinopterygii	Gadiformes	Gadidae	Micromesistius poutassou	Blue whiting	Micpou	oceanic bathypelagic	3.70	FB	NA	NA	NA	NA	NA	FI	BaA	HMW	Pyrolitic	WW	0.00015	0.00012	0.00338	0.00338	0.00223	0.00431	NA	December 2004	01/12/2004	Autumn	W	Perugini et al., 2007	2007	2004	10	NA	NA	NA	NA	9.04337E-07	0.014849315	NA	1.2
1037	IT	Gulf of Naples	37.1.3	Tyrrhenian	40.69191	14.17448	2	Actinopterygii	Gadiformes	Gadidae	Micromesistius poutassou	Blue whiting	Micpou	oceanic bathypelagic	3.70	FB	NA	NA	NA	NA	NA	FI	BaP	HMW	Pyrolitic	WW	0.0001	0.00007	<LOQ	0.00005	<LOQ	<LOQ	NA	December 2004	01/12/2004	Autumn	W	Perugini et al., 2007	2007	2004	10	NA	3.71604E-05	NA	NA	3.23296E-08	0.014849315	0.0003	2.9
1038	IT	Gulf of Naples	37.1.3	Tyrrhenian	40.69191	14.17448	2	Actinopterygii	Gadiformes	Gadidae	Micromesistius poutassou	Blue whiting	Micpou	oceanic bathypelagic	3.70	FB	NA	NA	NA	NA	NA	FI	BbF	HMW	Pyrolitic	WW	0.00006	0.00005	0.00468	0.00468	0.00312	0.00727	NA	December 2004	01/12/2004	Autumn	W	Perugini et al., 2007	2007	2004	10	NA	NA	NA	NA	1.25216E-06	0.014849315	NA	1.2
1039	IT	Gulf of Naples	37.1.3	Tyrrhenian	40.69191	14.17448	2	Actinopterygii	Gadiformes	Gadidae	Micromesistius poutassou	Blue whiting	Micpou	oceanic bathypelagic	3.70	FB	NA	NA	NA	NA	NA	FI	BghiP	HMW	Pyrolitic	WW	0.00024	0.00016	<LOQ	0.00012	<LOQ	<LOQ	NA	December 2004	01/12/2004	Autumn	W	Perugini et al., 2007	2007	2004	10	NA	NA	NA	NA	NA	0.014849315	NA	NA
1040	IT	Gulf of Naples	37.1.3	Tyrrhenian	40.69191	14.17448	2	Actinopterygii	Gadiformes	Gadidae	Micromesistius poutassou	Blue whiting	Micpou	oceanic bathypelagic	3.70	FB	NA	NA	NA	NA	NA	FI	BkF	HMW	Pyrolitic	WW	0.00002	0.00001	0.00043	0.00043	0.00014	0.00077	NA	December 2004	01/12/2004	Autumn	W	Perugini et al., 2007	2007	2004	10	NA	NA	NA	NA	1.15049E-07	0.014849315	NA	1.2
1041	IT	Gulf of Naples	37.1.3	Tyrrhenian	40.69191	14.17448	2	Actinopterygii	Gadiformes	Gadidae	Micromesistius poutassou	Blue whiting	Micpou	oceanic bathypelagic	3.70	FB	NA	NA	NA	NA	NA	FI	Chr	HMW	Pyrolitic	WW	0.00018	0.00016	0.00081	0.00081	0.00036	0.00109	NA	December 2004	01/12/2004	Autumn	W	Perugini et al., 2007	2007	2004	10	NA	NA	NA	NA	7.97267E-08	0.014849315	NA	0.441455329
1042	IT	Gulf of Naples	37.1.3	Tyrrhenian	40.69191	14.17448	2	Actinopterygii	Gadiformes	Gadidae	Micromesistius poutassou	Blue whiting	Micpou	oceanic bathypelagic	3.70	FB	NA	NA	NA	NA	NA	FI	DahA	HMW	Pyrolitic	WW	0.00008	0.00006	<LOQ	0.00004	<LOQ	<LOQ	NA	December 2004	01/12/2004	Autumn	W	Perugini et al., 2007	2007	2004	10	NA	NA	NA	NA	3.65659E-08	0.014849315	NA	4.1
1043	IT	Gulf of Naples	37.1.3	Tyrrhenian	40.69191	14.17448	2	Actinopterygii	Gadiformes	Gadidae	Micromesistius poutassou	Blue whiting	Micpou	oceanic bathypelagic	3.70	FB	NA	NA	NA	NA	NA	FI	Flu	MMW	Pyrolitic	WW	0.00021	0.00017	0.00179	0.00179	0.00128	0.0024	NA	December 2004	01/12/2004	Autumn	W	Perugini et al., 2007	2007	2004	10	9.97758E-06	9.97758E-06	7.13481E-06	1.33778E-05	NA	0.014849315	0.04	NA
1044	IT	Gulf of Naples	37.1.3	Tyrrhenian	40.69191	14.17448	2	Actinopterygii	Gadiformes	Gadidae	Micromesistius poutassou	Blue whiting	Micpou	oceanic bathypelagic	3.70	FB	NA	NA	NA	NA	NA	FI	InP	HMW	Pyrolitic	WW	0.00026	0.00021	<LOQ	0.00013	<LOQ	<LOQ	NA	December 2004	01/12/2004	Autumn	W	Perugini et al., 2007	2007	2004	10	NA	NA	NA	NA	3.47822E-08	0.014849315	NA	1.2
1045	IT	Gulf of Naples	37.1.3	Tyrrhenian	40.69191	14.17448	2	Actinopterygii	Gadiformes	Gadidae	Micromesistius poutassou	Blue whiting	Micpou	oceanic bathypelagic	3.70	FB	NA	NA	NA	NA	NA	FI	Pyr	MMW	Pyrolitic	WW	0.00062	0.00049	0.00418	0.00418	0.00276	0.00534	NA	December 2004	01/12/2004	Autumn	W	Perugini et al., 2007	2007	2004	10	3.10661E-05	3.10661E-05	2.05126E-05	3.96874E-05	NA	0.014849315	0.03	NA
1046	IT	Gulf of Naples	37.1.3	Tyrrhenian	40.69191	14.17448	2	Actinopterygii	Perciformes	Scombridae	Scomber scombrus	Atlantic mackerel	Scosco	oceanic mesopelagic	3.73	FB	NA	NA	NA	NA	NA	FI	Ant	LMW	Petrogenic	WW	0.00015	0.00013	0.00218	0.00218	0.0012	0.00393	NA	December 2004	01/12/2004	Autumn	W	Perugini et al., 2007	2007	2004	10	1.6202E-06	1.6202E-06	8.91851E-07	2.92081E-06	NA	0.014849315	0.3	NA
1047	IT	Gulf of Naples	37.1.3	Tyrrhenian	40.69191	14.17448	2	Actinopterygii	Perciformes	Scombridae	Scomber scombrus	Atlantic mackerel	Scosco	oceanic mesopelagic	3.73	FB	NA	NA	NA	NA	NA	FI	BaA	HMW	Pyrolitic	WW	0.00015	0.00012	0.00207	0.00207	0.00119	0.00281	NA	December 2004	01/12/2004	Autumn	W	Perugini et al., 2007	2007	2004	10	NA	NA	NA	NA	5.53839E-07	0.014849315	NA	1.2
1048	IT	Gulf of Naples	37.1.3	Tyrrhenian	40.69191	14.17448	2	Actinopterygii	Perciformes	Scombridae	Scomber scombrus	Atlantic mackerel	Scosco	oceanic mesopelagic	3.73	FB	NA	NA	NA	NA	NA	FI	BaP	HMW	Pyrolitic	WW	0.0001	0.00007	<LOQ	0.00005	<LOQ	<LOQ	NA	December 2004	01/12/2004	Autumn	W	Perugini et al., 2007	2007	2004	10	NA	3.71604E-05	NA	NA	3.23296E-08	0.014849315	0.0003	2.9
1049	IT	Gulf of Naples	37.1.3	Tyrrhenian	40.69191	14.17448	2	Actinopterygii	Perciformes	Scombridae	Scomber scombrus	Atlantic mackerel	Scosco	oceanic mesopelagic	3.73	FB	NA	NA	NA	NA	NA	FI	BbF	HMW	Pyrolitic	WW	0.00006	0.00005	0.00672	0.00672	0.00236	0.01681	NA	December 2004	01/12/2004	Autumn	W	Perugini et al., 2007	2007	2004	10	NA	NA	NA	NA	1.79797E-06	0.014849315	NA	1.2
1050	IT	Gulf of Naples	37.1.3	Tyrrhenian	40.69191	14.17448	2	Actinopterygii	Perciformes	Scombridae	Scomber scombrus	Atlantic mackerel	Scosco	oceanic mesopelagic	3.73	FB	NA	NA	NA	NA	NA	FI	BghiP	HMW	Pyrolitic	WW	0.00024	0.00016	<LOQ	0.00012	<LOQ	<LOQ	NA	December 2004	01/12/2004	Autumn	W	Perugini et al., 2007	2007	2004	10	NA	NA	NA	NA	NA	0.014849315	NA	NA
1051	IT	Gulf of Naples	37.1.3	Tyrrhenian	40.69191	14.17448	2	Actinopterygii	Perciformes	Scombridae	Scomber scombrus	Atlantic mackerel	Scosco	oceanic mesopelagic	3.73	FB	NA	NA	NA	NA	NA	FI	BkF	HMW	Pyrolitic	WW	0.00002	0.00001	0.00174	0.00174	0.00108	0.00265	NA	December 2004	01/12/2004	Autumn	W	Perugini et al., 2007	2007	2004	10	NA	NA	NA	NA	4.65546E-07	0.014849315	NA	1.2
1052	IT	Gulf of Naples	37.1.3	Tyrrhenian	40.69191	14.17448	2	Actinopterygii	Perciformes	Scombridae	Scomber scombrus	Atlantic mackerel	Scosco	oceanic mesopelagic	3.73	FB	NA	NA	NA	NA	NA	FI	Chr	HMW	Pyrolitic	WW	0.00018	0.00016	0.00121	0.00121	0.00037	0.00226	NA	December 2004	01/12/2004	Autumn	W	Perugini et al., 2007	2007	2004	10	NA	NA	NA	NA	1.19098E-07	0.014849315	NA	0.441455329
1053	IT	Gulf of Naples	37.1.3	Tyrrhenian	40.69191	14.17448	2	Actinopterygii	Perciformes	Scombridae	Scomber scombrus	Atlantic mackerel	Scosco	oceanic mesopelagic	3.73	FB	NA	NA	NA	NA	NA	FI	DahA	HMW	Pyrolitic	WW	0.00008	0.00006	<LOQ	0.00004	<LOQ	<LOQ	NA	December 2004	01/12/2004	Autumn	W	Perugini et al., 2007	2007	2004	10	NA	NA	NA	NA	3.65659E-08	0.014849315	NA	4.1
1054	IT	Gulf of Naples	37.1.3	Tyrrhenian	40.69191	14.17448	2	Actinopterygii	Perciformes	Scombridae	Scomber scombrus	Atlantic mackerel	Scosco	oceanic mesopelagic	3.73	FB	NA	NA	NA	NA	NA	FI	Flu	MMW	Pyrolitic	WW	0.00021	0.00017	0.00047	0.00047	<LOQ	0.00127	NA	December 2004	01/12/2004	Autumn	W	Perugini et al., 2007	2007	2004	10	2.61981E-06	2.61981E-06	NA	7.07907E-06	NA	0.014849315	0.04	NA
1055	IT	Gulf of Naples	37.1.3	Tyrrhenian	40.69191	14.17448	2	Actinopterygii	Perciformes	Scombridae	Scomber scombrus	Atlantic mackerel	Scosco	oceanic mesopelagic	3.73	FB	NA	NA	NA	NA	NA	FI	InP	HMW	Pyrolitic	WW	0.00026	0.00021	<LOQ	0.00013	<LOQ	<LOQ	NA	December 2004	01/12/2004	Autumn	W	Perugini et al., 2007	2007	2004	10	NA	NA	NA	NA	3.47822E-08	0.014849315	NA	1.2
1056	IT	Gulf of Naples	37.1.3	Tyrrhenian	40.69191	14.17448	2	Actinopterygii	Perciformes	Scombridae	Scomber scombrus	Atlantic mackerel	Scosco	oceanic mesopelagic	3.73	FB	NA	NA	NA	NA	NA	FI	Pyr	MMW	Pyrolitic	WW	0.00062	0.00049	0.00174	0.00174	0.00066	0.00291	NA	December 2004	01/12/2004	Autumn	W	Perugini et al., 2007	2007	2004	10	1.29318E-05	1.29318E-05	4.90518E-06	2.16274E-05	NA	0.014849315	0.03	NA
1057	IT	Gulf of Naples	37.1.3	Tyrrhenian	40.69191	14.17448	2	Actinopterygii	Gadiformes	Merlucciidae	Merluccius merluccius	European hake	Mermer	neritic epipelagic demersal	4.43	FB	NA	NA	NA	NA	NA	FI	Ant	LMW	Petrogenic	WW	0.00015	0.00013	0.0014	0.0014	0.0002	0.0042	NA	December 2004	01/12/2004	Autumn	W	Perugini et al., 2007	2007	2004	10	1.49163E-06	1.49163E-06	2.1309E-07	4.47489E-06	NA	0.021287671	0.3	NA
1058	IT	Gulf of Naples	37.1.3	Tyrrhenian	40.69191	14.17448	2	Actinopterygii	Gadiformes	Merlucciidae	Merluccius merluccius	European hake	Mermer	neritic epipelagic demersal	4.43	FB	NA	NA	NA	NA	NA	FI	BaA	HMW	Pyrolitic	WW	0.00015	0.00012	0.00284	0.00284	0.00148	0.00404	NA	December 2004	01/12/2004	Autumn	W	Perugini et al., 2007	2007	2004	10	NA	NA	NA	NA	1.08932E-06	0.021287671	NA	1.2
1059	IT	Gulf of Naples	37.1.3	Tyrrhenian	40.69191	14.17448	2	Actinopterygii	Gadiformes	Merlucciidae	Merluccius merluccius	European hake	Mermer	neritic epipelagic demersal	4.43	FB	NA	NA	NA	NA	NA	FI	BaP	HMW	Pyrolitic	WW	0.0001	0.00007	<LOQ	0.00005	<LOQ	<LOQ	NA	December 2004	01/12/2004	Autumn	W	Perugini et al., 2007	2007	2004	10	NA	5.32725E-05	NA	NA	4.6347E-08	0.021287671	0.0003	2.9
1060	IT	Gulf of Naples	37.1.3	Tyrrhenian	40.69191	14.17448	2	Actinopterygii	Gadiformes	Merlucciidae	Merluccius merluccius	European hake	Mermer	neritic epipelagic demersal	4.43	FB	NA	NA	NA	NA	NA	FI	BbF	HMW	Pyrolitic	WW	0.00006	0.00005	<LOQ	0.00003	<LOQ	<LOQ	NA	December 2004	01/12/2004	Autumn	W	Perugini et al., 2007	2007	2004	10	NA	NA	NA	NA	1.15068E-08	0.021287671	NA	1.2
1061	IT	Gulf of Naples	37.1.3	Tyrrhenian	40.69191	14.17448	2	Actinopterygii	Gadiformes	Merlucciidae	Merluccius merluccius	European hake	Mermer	neritic epipelagic demersal	4.43	FB	NA	NA	NA	NA	NA	FI	BghiP	HMW	Pyrolitic	WW	0.00024	0.00016	<LOQ	0.00012	<LOQ	<LOQ	NA	December 2004	01/12/2004	Autumn	W	Perugini et al., 2007	2007	2004	10	NA	NA	NA	NA	NA	0.021287671	NA	NA
1062	IT	Gulf of Naples	37.1.3	Tyrrhenian	40.69191	14.17448	2	Actinopterygii	Gadiformes	Merlucciidae	Merluccius merluccius	European hake	Mermer	neritic epipelagic demersal	4.43	FB	NA	NA	NA	NA	NA	FI	BkF	HMW	Pyrolitic	WW	0.00002	0.00001	0.00145	0.00145	0.00098	0.00193	NA	December 2004	01/12/2004	Autumn	W	Perugini et al., 2007	2007	2004	10	NA	NA	NA	NA	5.56164E-07	0.021287671	NA	1.2
1063	IT	Gulf of Naples	37.1.3	Tyrrhenian	40.69191	14.17448	2	Actinopterygii	Gadiformes	Merlucciidae	Merluccius merluccius	European hake	Mermer	neritic epipelagic demersal	4.43	FB	NA	NA	NA	NA	NA	FI	Chr	HMW	Pyrolitic	WW	0.00018	0.00016	0.00064	0.00064	0.00034	0.00088	NA	December 2004	01/12/2004	Autumn	W	Perugini et al., 2007	2007	2004	10	NA	NA	NA	NA	9.03068E-08	0.021287671	NA	0.441455329
1064	IT	Gulf of Naples	37.1.3	Tyrrhenian	40.69191	14.17448	2	Actinopterygii	Gadiformes	Merlucciidae	Merluccius merluccius	European hake	Mermer	neritic epipelagic demersal	4.43	FB	NA	NA	NA	NA	NA	FI	DahA	HMW	Pyrolitic	WW	0.00008	0.00006	<LOQ	0.00004	<LOQ	<LOQ	NA	December 2004	01/12/2004	Autumn	W	Perugini et al., 2007	2007	2004	10	NA	NA	NA	NA	5.24201E-08	0.021287671	NA	4.1
1065	IT	Gulf of Naples	37.1.3	Tyrrhenian	40.69191	14.17448	2	Actinopterygii	Gadiformes	Merlucciidae	Merluccius merluccius	European hake	Mermer	neritic epipelagic demersal	4.43	FB	NA	NA	NA	NA	NA	FI	Flu	MMW	Pyrolitic	WW	0.00021	0.00017	0.00035	0.00035	<LOQ	0.00098	NA	December 2004	01/12/2004	Autumn	W	Perugini et al., 2007	2007	2004	10	2.7968E-06	2.7968E-06	NA	7.83105E-06	NA	0.021287671	0.04	NA
1066	IT	Gulf of Naples	37.1.3	Tyrrhenian	40.69191	14.17448	2	Actinopterygii	Gadiformes	Merlucciidae	Merluccius merluccius	European hake	Mermer	neritic epipelagic demersal	4.43	FB	NA	NA	NA	NA	NA	FI	InP	HMW	Pyrolitic	WW	0.00026	0.00021	<LOQ	0.00013	<LOQ	<LOQ	NA	December 2004	01/12/2004	Autumn	W	Perugini et al., 2007	2007	2004	10	NA	NA	NA	NA	4.9863E-08	0.021287671	NA	1.2
1067	IT	Gulf of Naples	37.1.3	Tyrrhenian	40.69191	14.17448	2	Actinopterygii	Gadiformes	Merlucciidae	Merluccius merluccius	European hake	Mermer	neritic epipelagic demersal	4.43	FB	NA	NA	NA	NA	NA	FI	Pyr	MMW	Pyrolitic	WW	0.00062	0.00049	<LOQ	0.00031	<LOQ	<LOQ	NA	December 2004	01/12/2004	Autumn	W	Perugini et al., 2007	2007	2004	10	NA	3.30289E-06	NA	NA	NA	0.021287671	0.03	NA
1068	IT	Gulf of Naples	37.1.3	Tyrrhenian	40.69191	14.17448	2	Actinopterygii	Perciformes	Mullidae	Mullus barbatus	Red mullet	Mulbar	neritic mesopelagic demersal	3.24	FB	NA	NA	NA	NA	NA	FI	Ant	LMW	Petrogenic	WW	0.00015	0.00013	0.00271	0.00271	0.00173	0.00638	NA	December 2004	01/12/2004	Autumn	W	Perugini et al., 2007	2007	2004	10	2.88737E-06	2.88737E-06	1.84323E-06	6.79756E-06	NA	0.021287671	0.3	NA
1069	IT	Gulf of Naples	37.1.3	Tyrrhenian	40.69191	14.17448	2	Actinopterygii	Perciformes	Mullidae	Mullus barbatus	Red mullet	Mulbar	neritic mesopelagic demersal	3.24	FB	NA	NA	NA	NA	NA	FI	BaA	HMW	Pyrolitic	WW	0.00015	0.00012	0.00265	0.00265	0.00178	0.00339	NA	December 2004	01/12/2004	Autumn	W	Perugini et al., 2007	2007	2004	10	NA	NA	NA	NA	1.01644E-06	0.021287671	NA	1.2
1070	IT	Gulf of Naples	37.1.3	Tyrrhenian	40.69191	14.17448	2	Actinopterygii	Perciformes	Mullidae	Mullus barbatus	Red mullet	Mulbar	neritic mesopelagic demersal	3.24	FB	NA	NA	NA	NA	NA	FI	BaP	HMW	Pyrolitic	WW	0.0001	0.00007	<LOQ	0.00005	<LOQ	<LOQ	NA	December 2004	01/12/2004	Autumn	W	Perugini et al., 2007	2007	2004	10	NA	5.32725E-05	NA	NA	4.6347E-08	0.021287671	0.0003	2.9
1071	IT	Gulf of Naples	37.1.3	Tyrrhenian	40.69191	14.17448	2	Actinopterygii	Perciformes	Mullidae	Mullus barbatus	Red mullet	Mulbar	neritic mesopelagic demersal	3.24	FB	NA	NA	NA	NA	NA	FI	BbF	HMW	Pyrolitic	WW	0.00006	0.00005	0.0046	0.0046	0.00419	0.00565	NA	December 2004	01/12/2004	Autumn	W	Perugini et al., 2007	2007	2004	10	NA	NA	NA	NA	1.76438E-06	0.021287671	NA	1.2
1072	IT	Gulf of Naples	37.1.3	Tyrrhenian	40.69191	14.17448	2	Actinopterygii	Perciformes	Mullidae	Mullus barbatus	Red mullet	Mulbar	neritic mesopelagic demersal	3.24	FB	NA	NA	NA	NA	NA	FI	BghiP	HMW	Pyrolitic	WW	0.00024	0.00016	<LOQ	0.00012	<LOQ	<LOQ	NA	December 2004	01/12/2004	Autumn	W	Perugini et al., 2007	2007	2004	10	NA	NA	NA	NA	NA	0.021287671	NA	NA
1073	IT	Gulf of Naples	37.1.3	Tyrrhenian	40.69191	14.17448	2	Actinopterygii	Perciformes	Mullidae	Mullus barbatus	Red mullet	Mulbar	neritic mesopelagic demersal	3.24	FB	NA	NA	NA	NA	NA	FI	BkF	HMW	Pyrolitic	WW	0.00002	0.00001	0.00086	0.00086	0.00018	0.00134	NA	December 2004	01/12/2004	Autumn	W	Perugini et al., 2007	2007	2004	10	NA	NA	NA	NA	3.29863E-07	0.021287671	NA	1.2
1074	IT	Gulf of Naples	37.1.3	Tyrrhenian	40.69191	14.17448	2	Actinopterygii	Perciformes	Mullidae	Mullus barbatus	Red mullet	Mulbar	neritic mesopelagic demersal	3.24	FB	NA	NA	NA	NA	NA	FI	Chr	HMW	Pyrolitic	WW	0.00018	0.00016	<LOQ	0.00009	<LOQ	<LOQ	NA	December 2004	01/12/2004	Autumn	W	Perugini et al., 2007	2007	2004	10	NA	NA	NA	NA	1.26994E-08	0.021287671	NA	0.441455329
1075	IT	Gulf of Naples	37.1.3	Tyrrhenian	40.69191	14.17448	2	Actinopterygii	Perciformes	Mullidae	Mullus barbatus	Red mullet	Mulbar	neritic mesopelagic demersal	3.24	FB	NA	NA	NA	NA	NA	FI	DahA	HMW	Pyrolitic	WW	0.00008	0.00006	<LOQ	0.00004	<LOQ	<LOQ	NA	December 2004	01/12/2004	Autumn	W	Perugini et al., 2007	2007	2004	10	NA	NA	NA	NA	5.24201E-08	0.021287671	NA	4.1
1076	IT	Gulf of Naples	37.1.3	Tyrrhenian	40.69191	14.17448	2	Actinopterygii	Perciformes	Mullidae	Mullus barbatus	Red mullet	Mulbar	neritic mesopelagic demersal	3.24	FB	NA	NA	NA	NA	NA	FI	Flu	MMW	Pyrolitic	WW	0.00021	0.00017	0.00042	0.00042	<LOQ	0.00108	NA	December 2004	01/12/2004	Autumn	W	Perugini et al., 2007	2007	2004	10	3.35616E-06	3.35616E-06	NA	8.63014E-06	NA	0.021287671	0.04	NA
1077	IT	Gulf of Naples	37.1.3	Tyrrhenian	40.69191	14.17448	2	Actinopterygii	Perciformes	Mullidae	Mullus barbatus	Red mullet	Mulbar	neritic mesopelagic demersal	3.24	FB	NA	NA	NA	NA	NA	FI	InP	HMW	Pyrolitic	WW	0.00026	0.00021	<LOQ	0.00013	<LOQ	<LOQ	NA	December 2004	01/12/2004	Autumn	W	Perugini et al., 2007	2007	2004	10	NA	NA	NA	NA	4.9863E-08	0.021287671	NA	1.2
1078	IT	Gulf of Naples	37.1.3	Tyrrhenian	40.69191	14.17448	2	Actinopterygii	Perciformes	Mullidae	Mullus barbatus	Red mullet	Mulbar	neritic mesopelagic demersal	3.24	FB	NA	NA	NA	NA	NA	FI	Pyr	MMW	Pyrolitic	WW	0.00062	0.00049	0.00319	0.00319	0.0024	0.00491	NA	December 2004	01/12/2004	Autumn	W	Perugini et al., 2007	2007	2004	10	3.39878E-05	3.39878E-05	2.55708E-05	5.23135E-05	NA	0.021287671	0.03	NA
1079	HR	Gulf of Rijeka (Bakar)	37.2.1	Adriatic	45.30126	14.54477	2	Bivalvia	Mytiloida	Mytilidae	Mytilus galloprovincialis	Mediterranean mussel	Mytgal	neritic epipelagic benthic	2.69	SLB	NA	4.5	NA	NA	NA	WH	Ace	LMW	Petrogenic	WW	NA	0.0001	0.024	0.024	NA	NA	3	NA	NA	NA	W	Bihari et al., 2007	2007	NA	11	8.81978E-05	8.81978E-05	NA	NA	NA	0.014684932	0.06	NA
1080	HR	Gulf of Rijeka (Bakar)	37.2.1	Adriatic	45.30126	14.54477	2	Bivalvia	Mytiloida	Mytilidae	Mytilus galloprovincialis	Mediterranean mussel	Mytgal	neritic epipelagic benthic	2.69	SLB	NA	4.5	NA	NA	NA	WH	Ant	LMW	Petrogenic	WW	NA	0.0001	0.013	0.013	NA	NA	3	NA	NA	NA	W	Bihari et al., 2007	2007	NA	11	9.55476E-06	9.55476E-06	NA	NA	NA	0.014684932	0.3	NA
1081	HR	Gulf of Rijeka (Bakar)	37.2.1	Adriatic	45.30126	14.54477	2	Bivalvia	Mytiloida	Mytilidae	Mytilus galloprovincialis	Mediterranean mussel	Mytgal	neritic epipelagic benthic	2.69	SLB	NA	4.5	NA	NA	NA	WH	BaA	HMW	Pyrolitic	WW	NA	0.0001	0.0025	0.0025	NA	NA	3	NA	NA	NA	W	Bihari et al., 2007	2007	NA	11	NA	NA	NA	NA	6.61483E-07	0.014684932	NA	1.2
1082	HR	Gulf of Rijeka (Bakar)	37.2.1	Adriatic	45.30126	14.54477	2	Bivalvia	Mytiloida	Mytilidae	Mytilus galloprovincialis	Mediterranean mussel	Mytgal	neritic epipelagic benthic	2.69	SLB	NA	4.5	NA	NA	NA	WH	BaP	HMW	Pyrolitic	WW	NA	0.0001	<LOD	0.00005	NA	NA	3	NA	NA	NA	W	Bihari et al., 2007	2007	NA	11	NA	3.67491E-05	NA	NA	3.19717E-08	0.014684932	0.0003	2.9
1083	HR	Gulf of Rijeka (Bakar)	37.2.1	Adriatic	45.30126	14.54477	2	Bivalvia	Mytiloida	Mytilidae	Mytilus galloprovincialis	Mediterranean mussel	Mytgal	neritic epipelagic benthic	2.69	SLB	NA	4.5	NA	NA	NA	WH	BbF+BkF	HMW	Pyrolitic	WW	NA	0.0001	<LOD	0.00005	NA	NA	3	NA	NA	NA	W	Bihari et al., 2007	2007	NA	11	NA	NA	NA	NA	NA	0.014684932	NA	NA
1084	HR	Gulf of Rijeka (Bakar)	37.2.1	Adriatic	45.30126	14.54477	2	Bivalvia	Mytiloida	Mytilidae	Mytilus galloprovincialis	Mediterranean mussel	Mytgal	neritic epipelagic benthic	2.69	SLB	NA	4.5	NA	NA	NA	WH	Chr	HMW	Pyrolitic	WW	NA	0.0001	<LOD	0.00005	NA	NA	3	NA	NA	NA	W	Bihari et al., 2007	2007	NA	11	NA	NA	NA	NA	4.86692E-09	0.014684932	NA	0.441455329
[truncated: 9,620 more rows]
[truncated: 9 more columns]
